# Supplementary material for: El cortijo andaluz: : su origen, desarrollo y transformaciones recientes en la campiña de Córdoba
Source: Royal Society of Chemistry journal article supplement (doi:10.1039/d2ob02058k), 1989-01-01

## Supporting Information-II NMR Spectral Data

### Asymmetric synthesis of perhydroepoxyethanoindole cores *via* sequential [4+2]- addition/reduction/fluoroannulation reactions

Madavi S. Prasad,<sup>\*a</sup> and Murugesan Sivaprakash,<sup>a</sup>

*Asymmetric Synthesis and Catalysis Laboratory, Department of Chemistry, Central University of Tamil Nadu, Thiruvavur, 610 005, India*

[shivaprasad@cutn.ac.in](mailto:shivaprasad@cutn.ac.in) and [shivacutn@gmail.com](mailto:shivacutn@gmail.com)

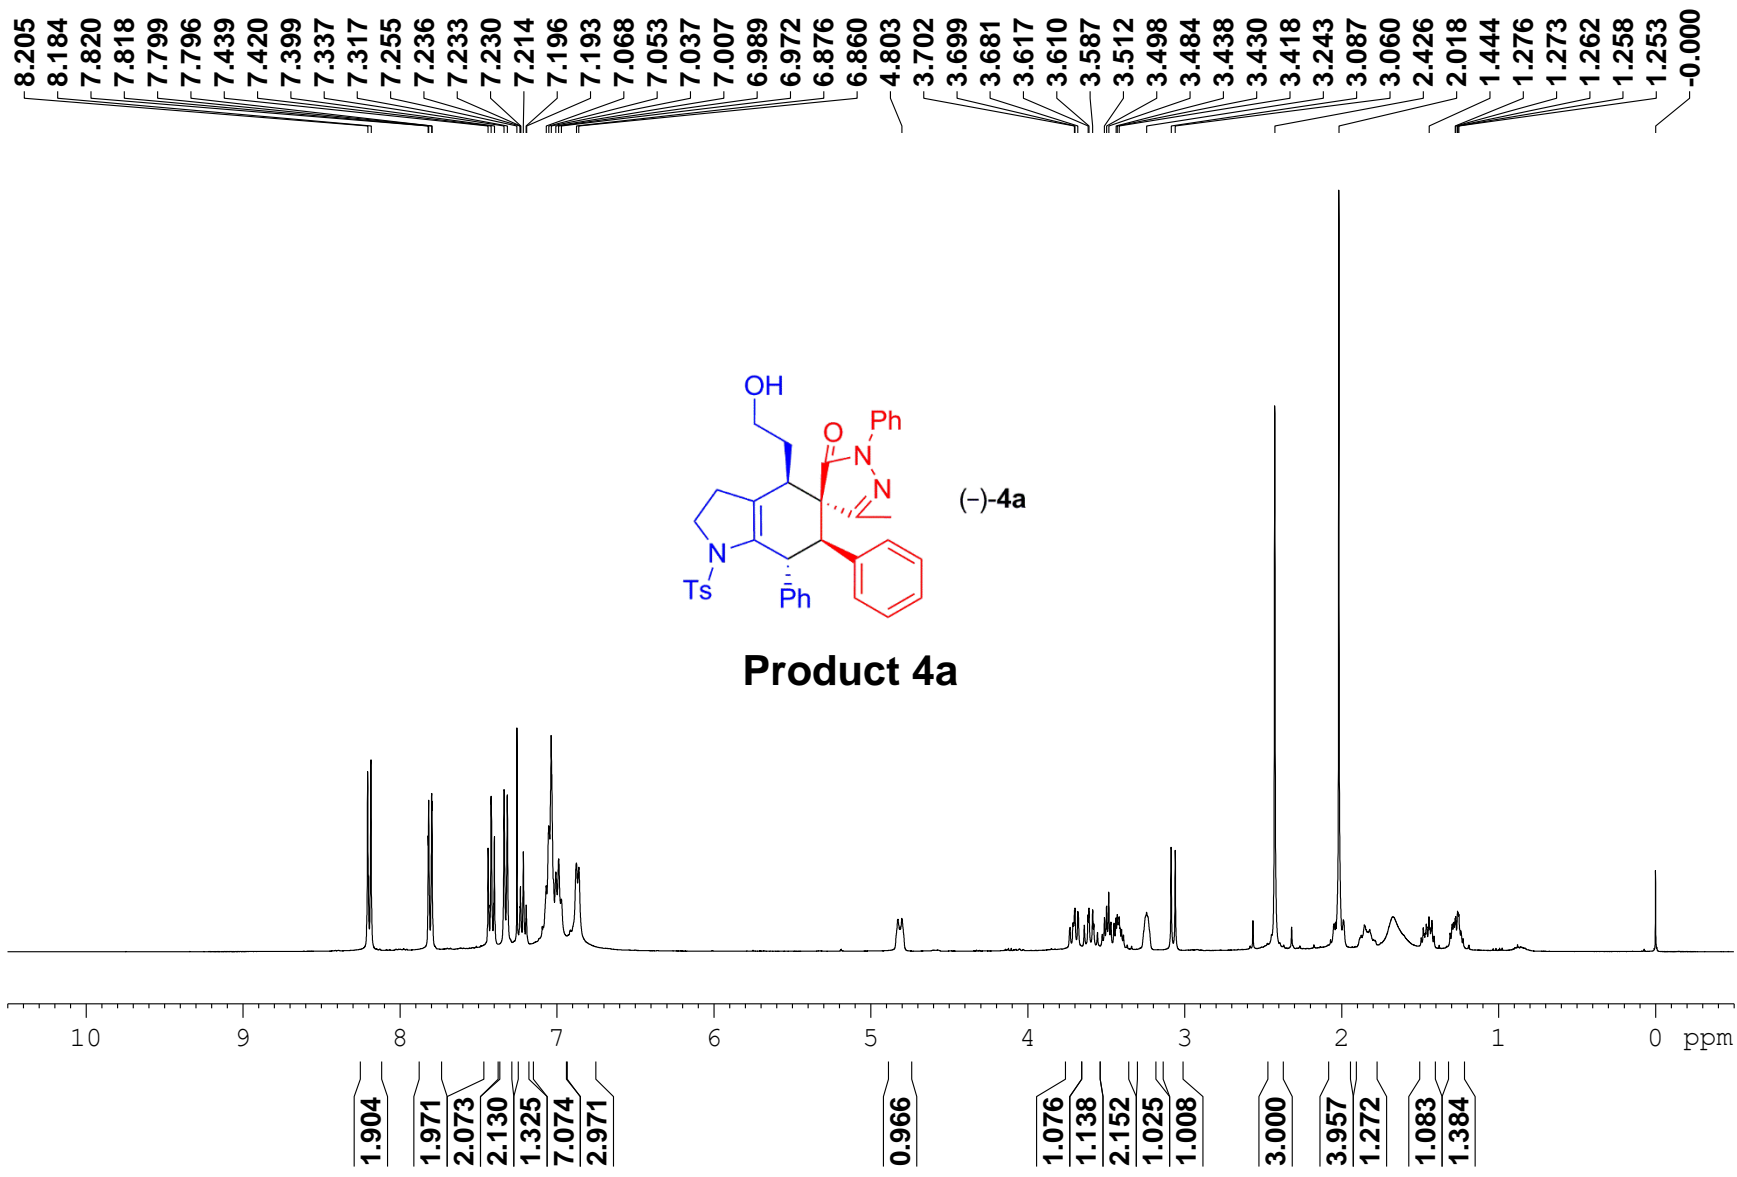

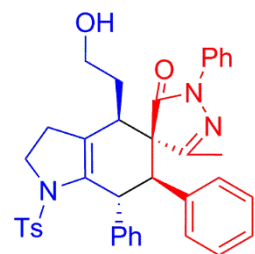

(-)-4a

**Product 4a**

172.80  
161.80  
143.46  
140.74  
139.29  
137.79  
136.85  
134.53  
129.34  
128.83  
128.38  
128.20  
127.66  
127.59  
126.10  
125.18  
119.20

77.37  
77.06  
76.74  
61.83  
60.01  
56.29  
49.84  
44.65  
36.00  
31.58  
30.73  
21.66  
14.03

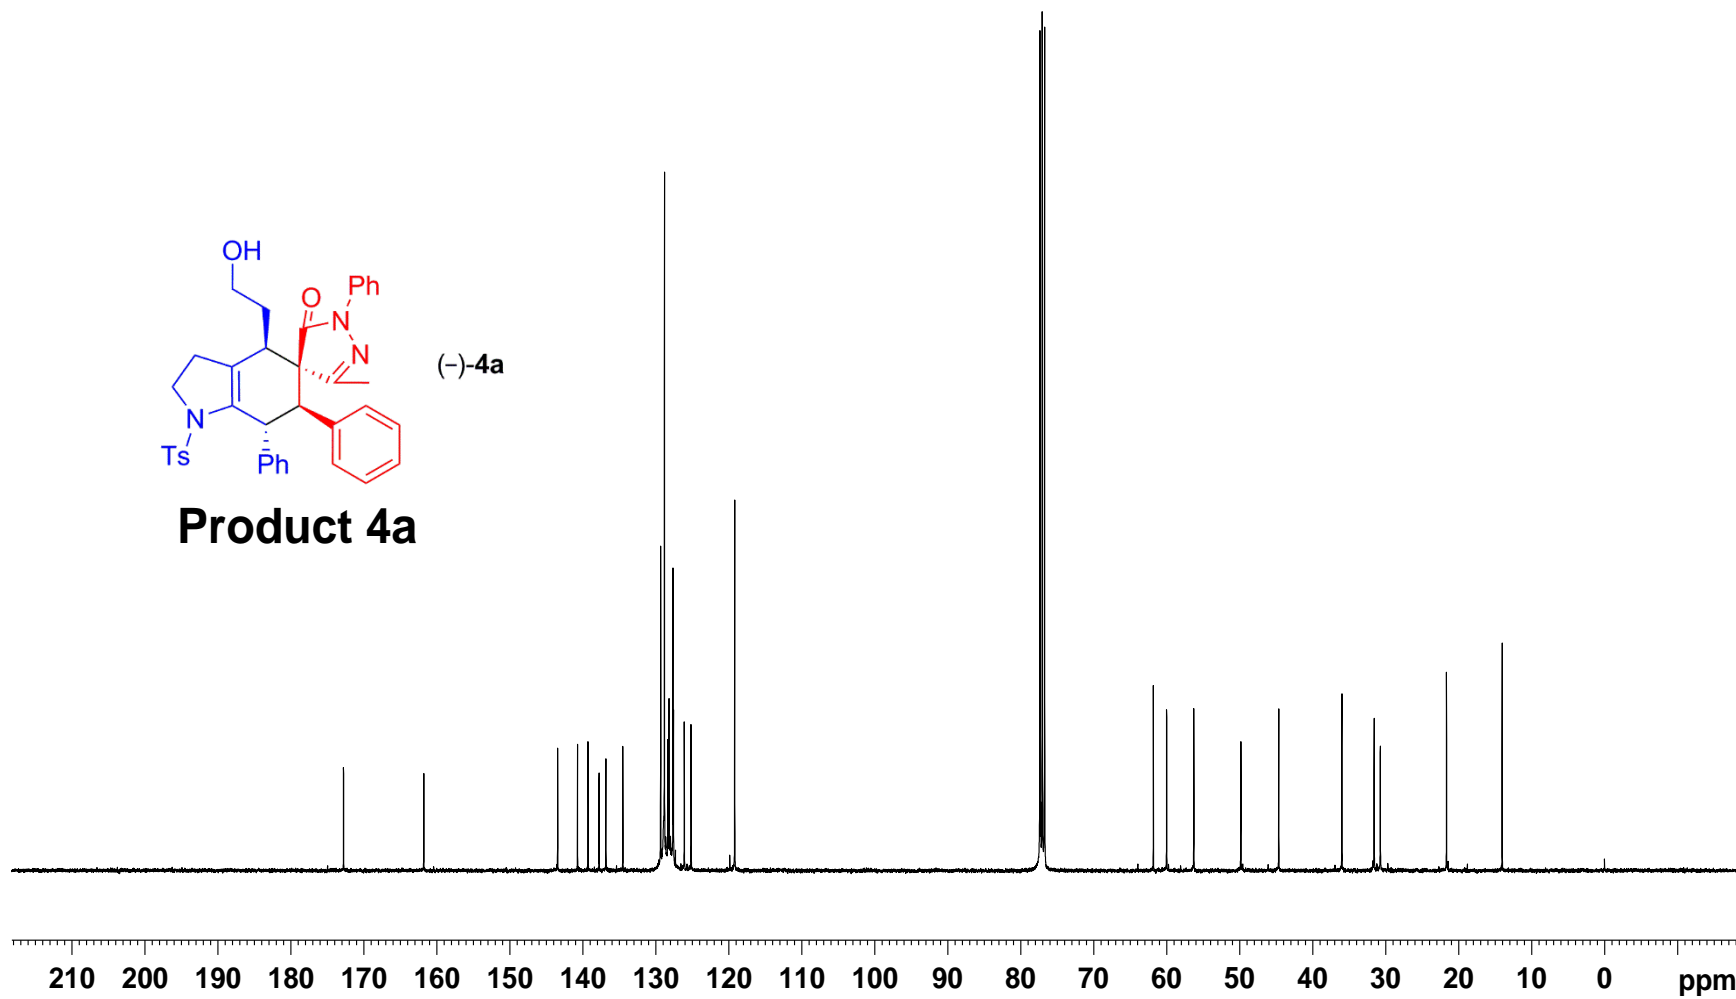

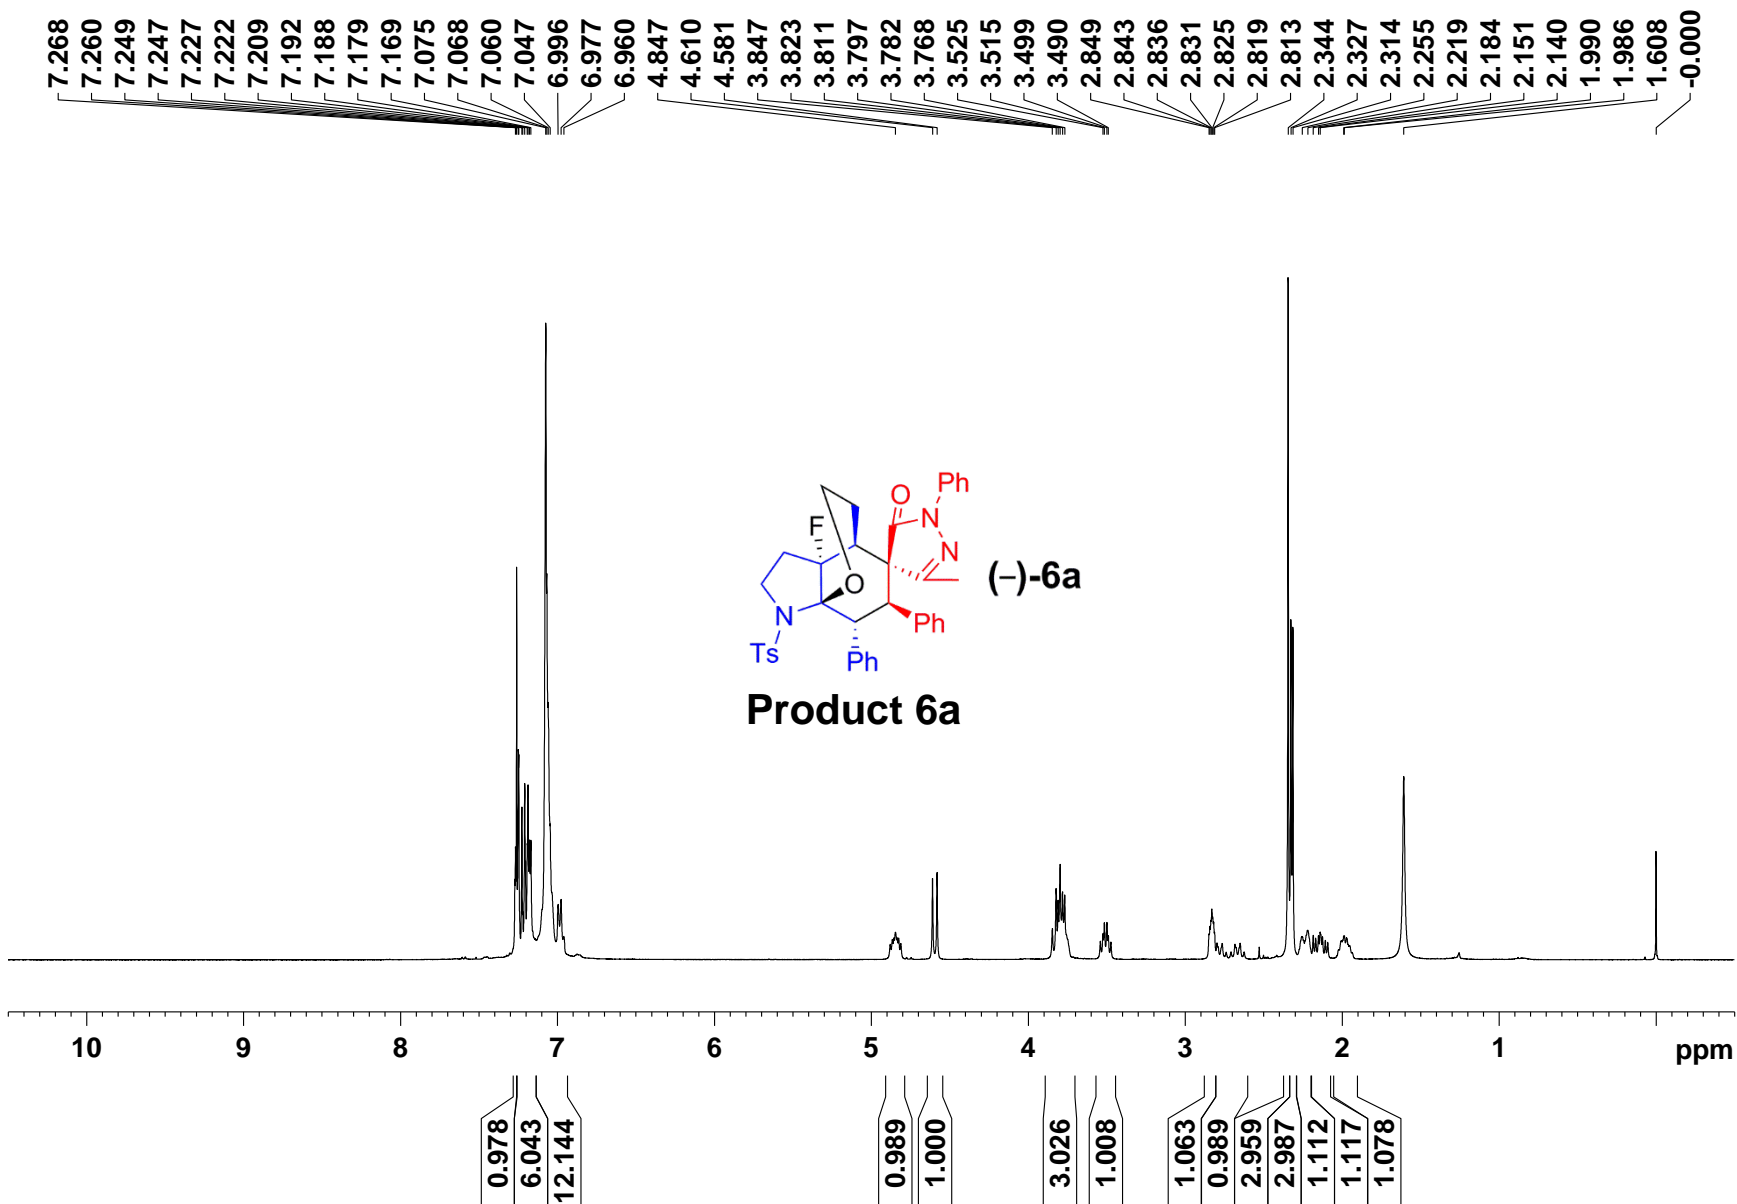

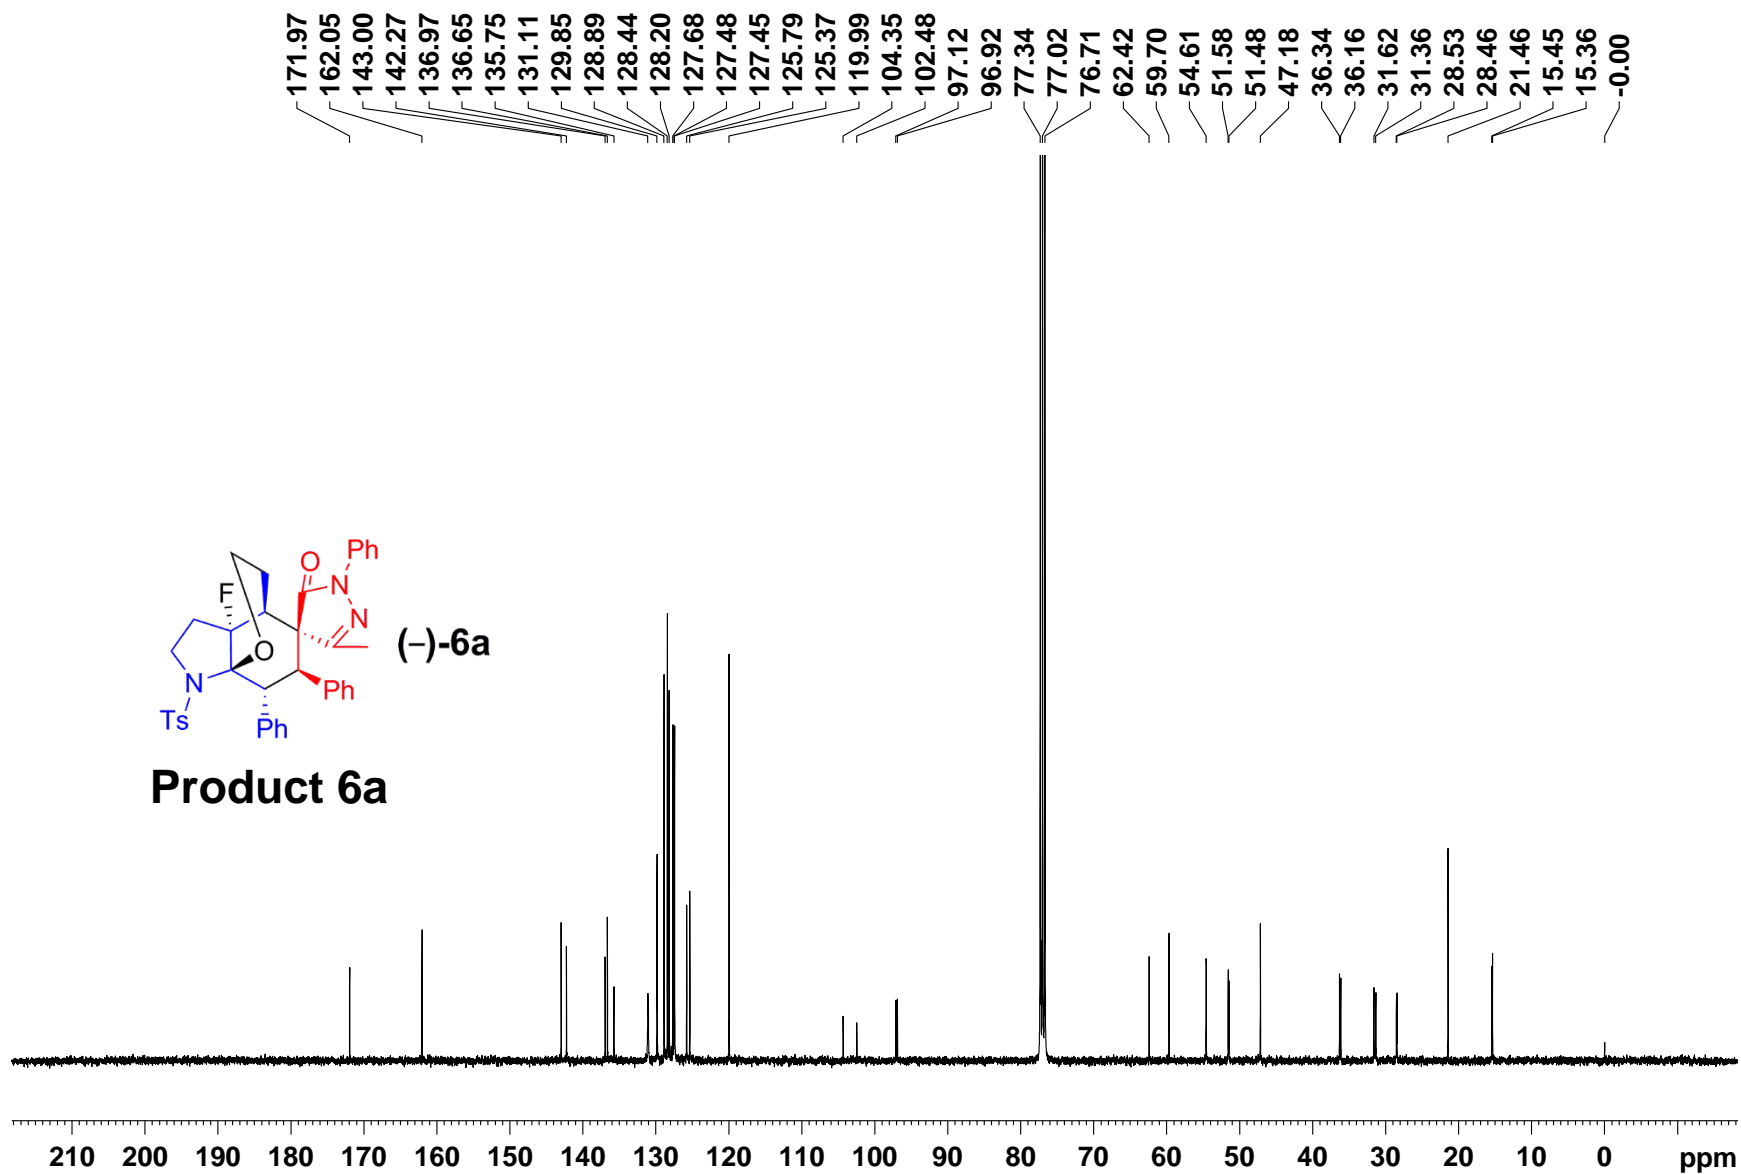

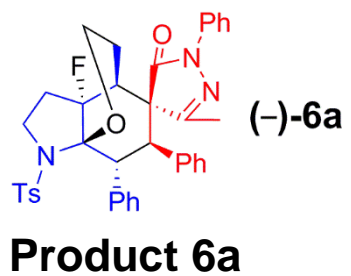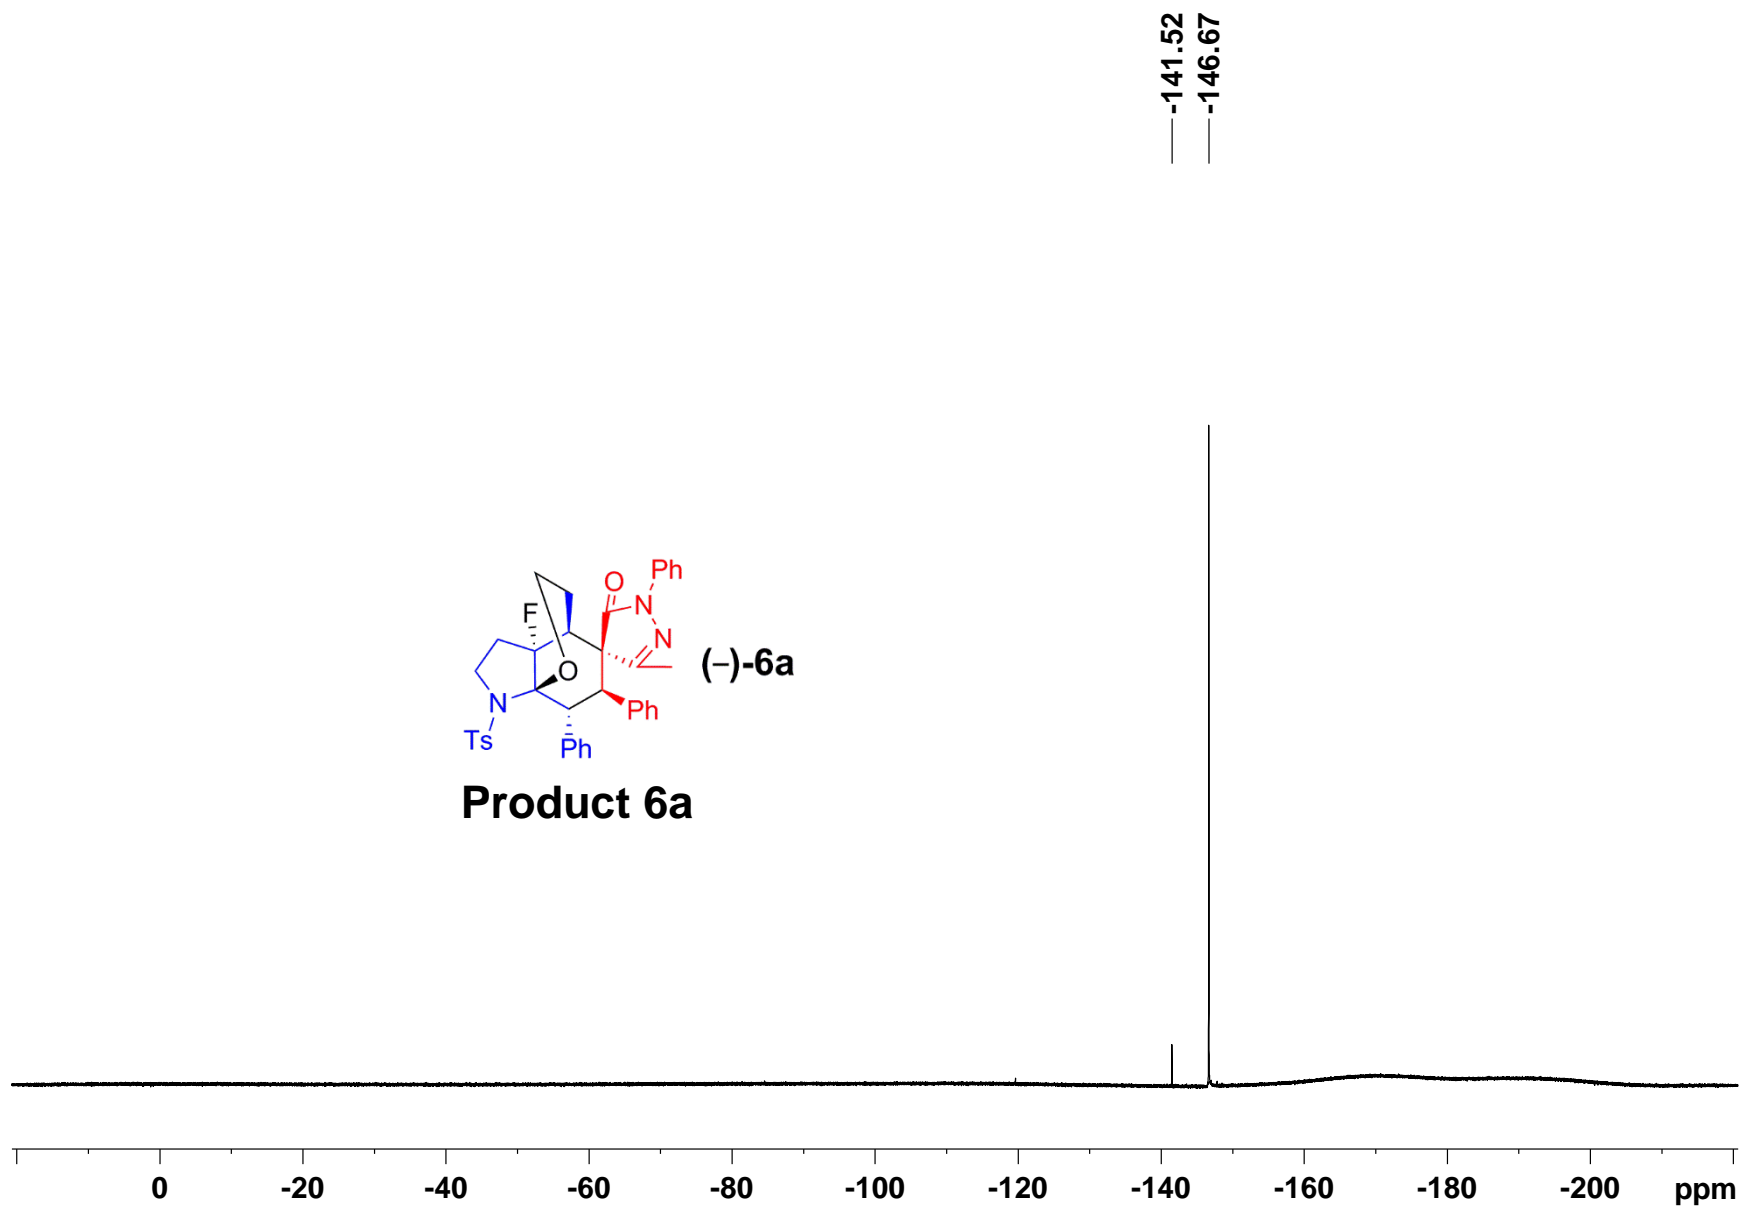

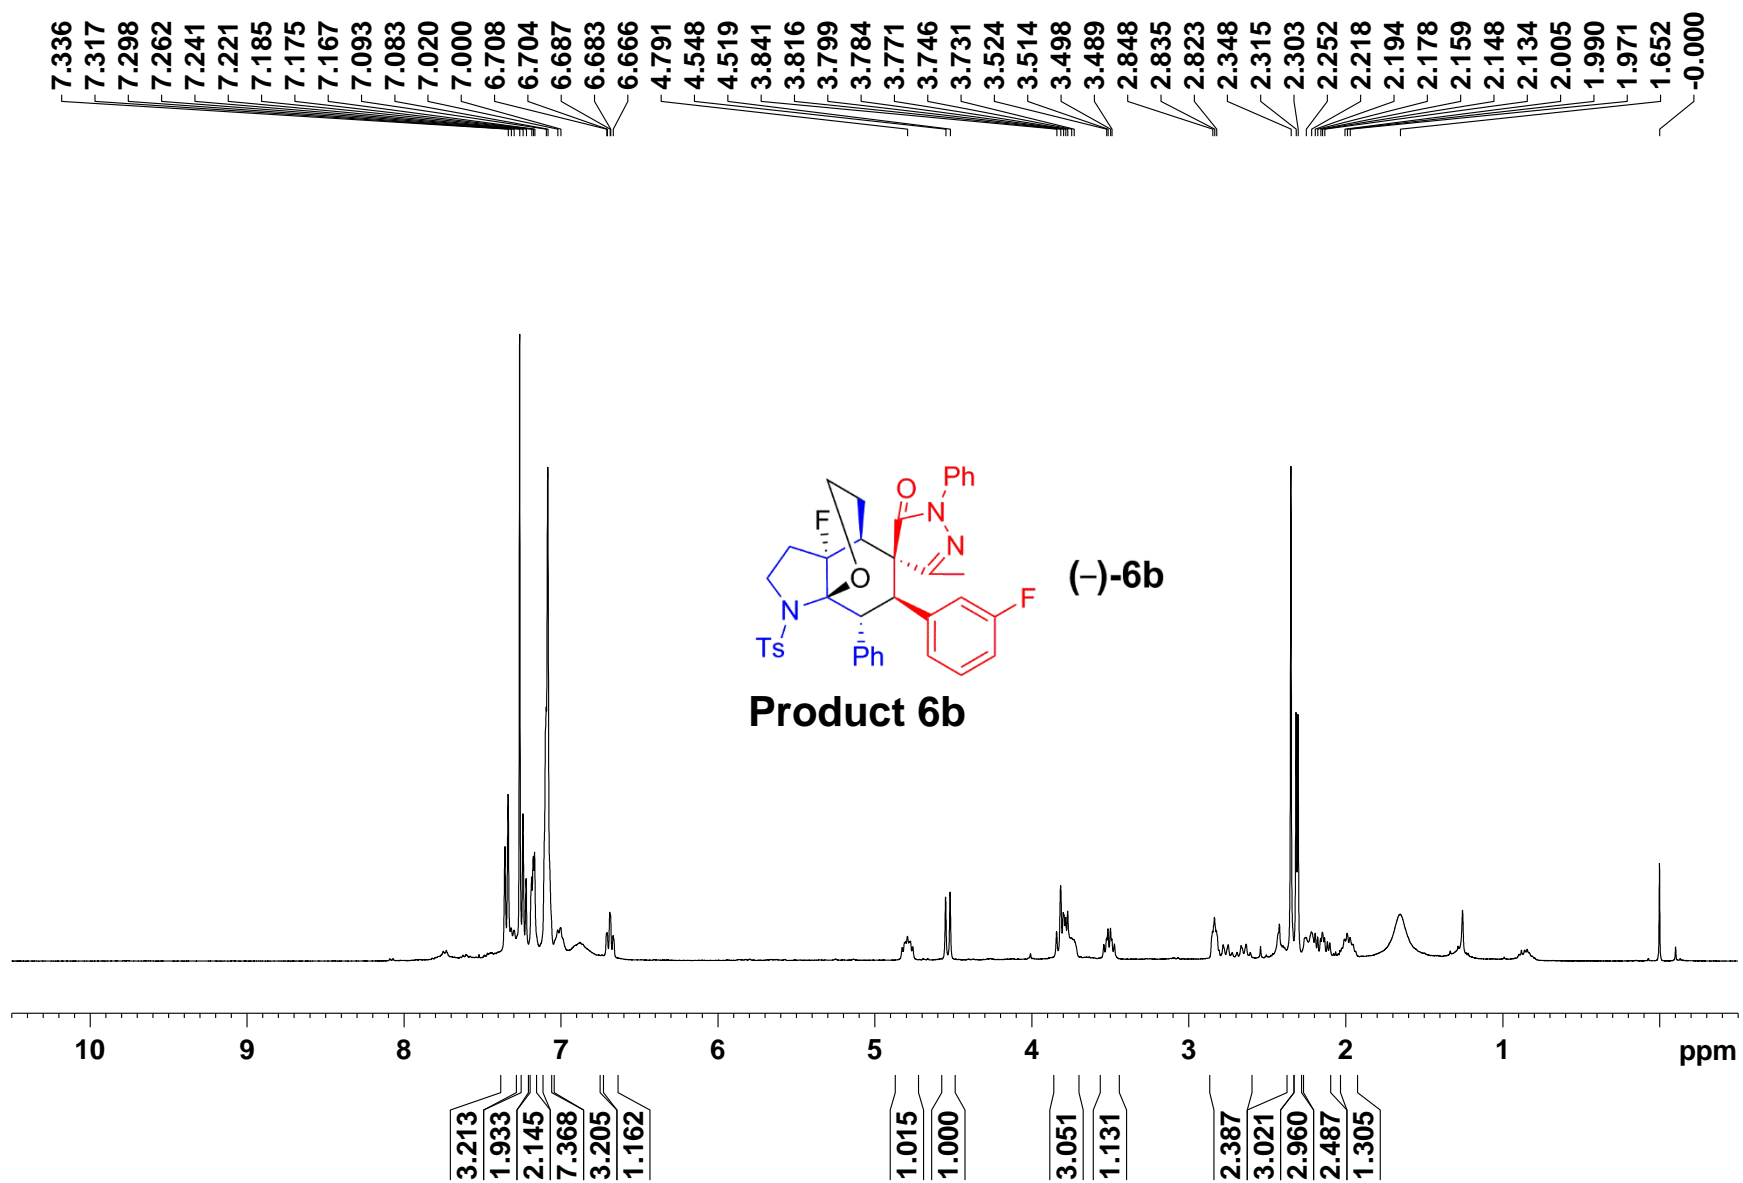

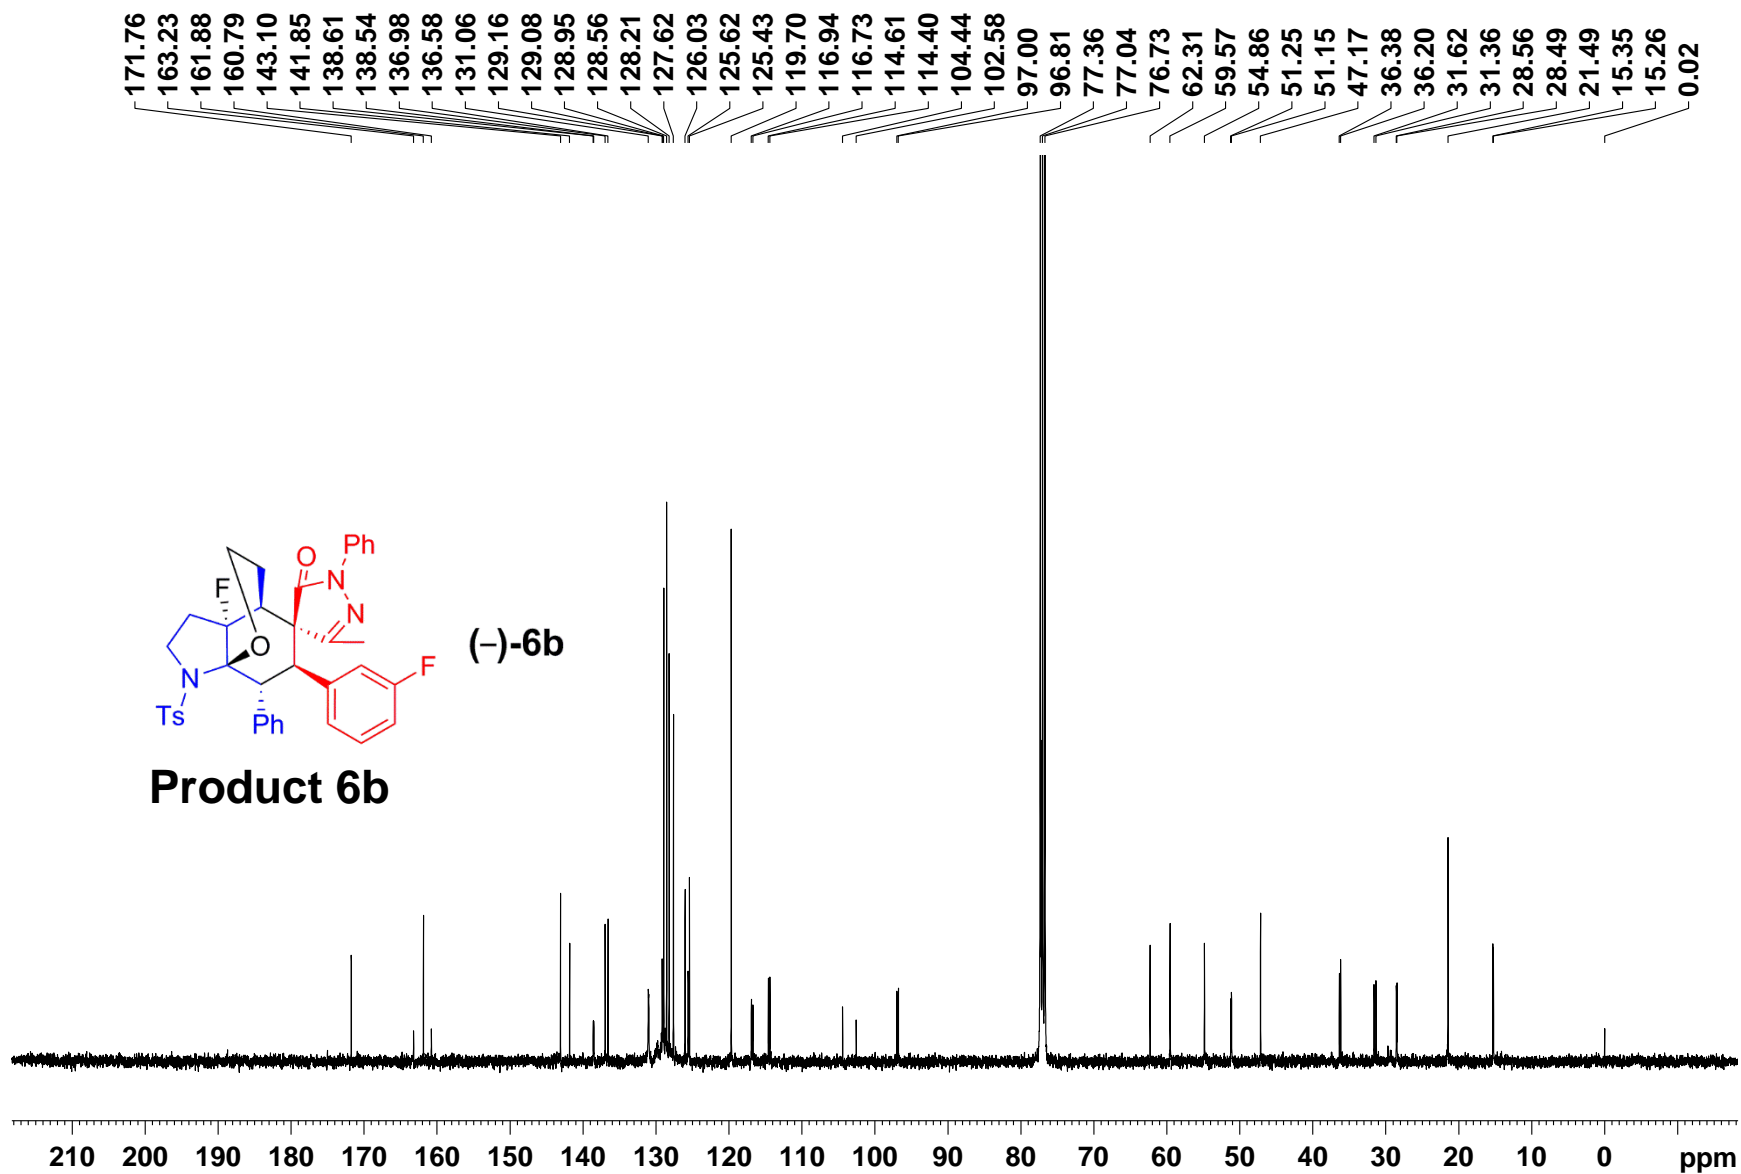



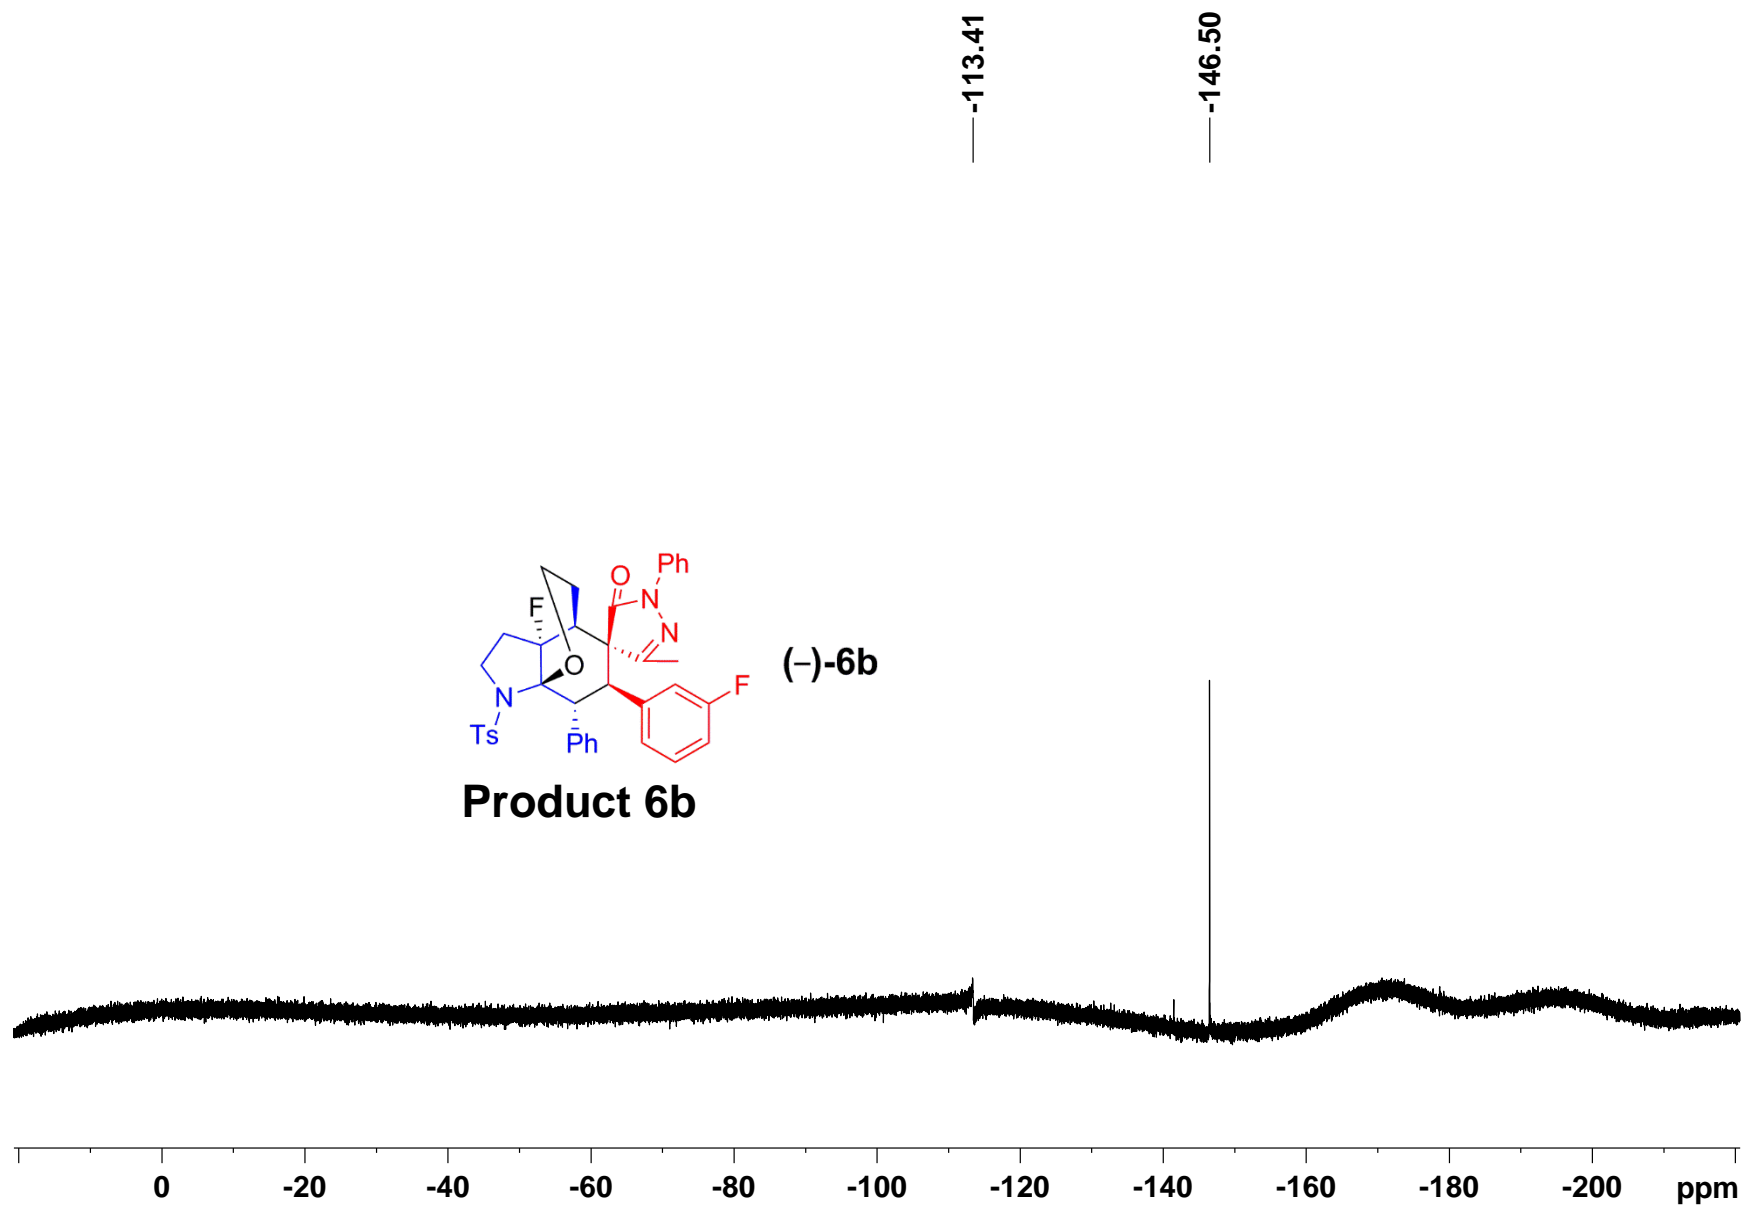

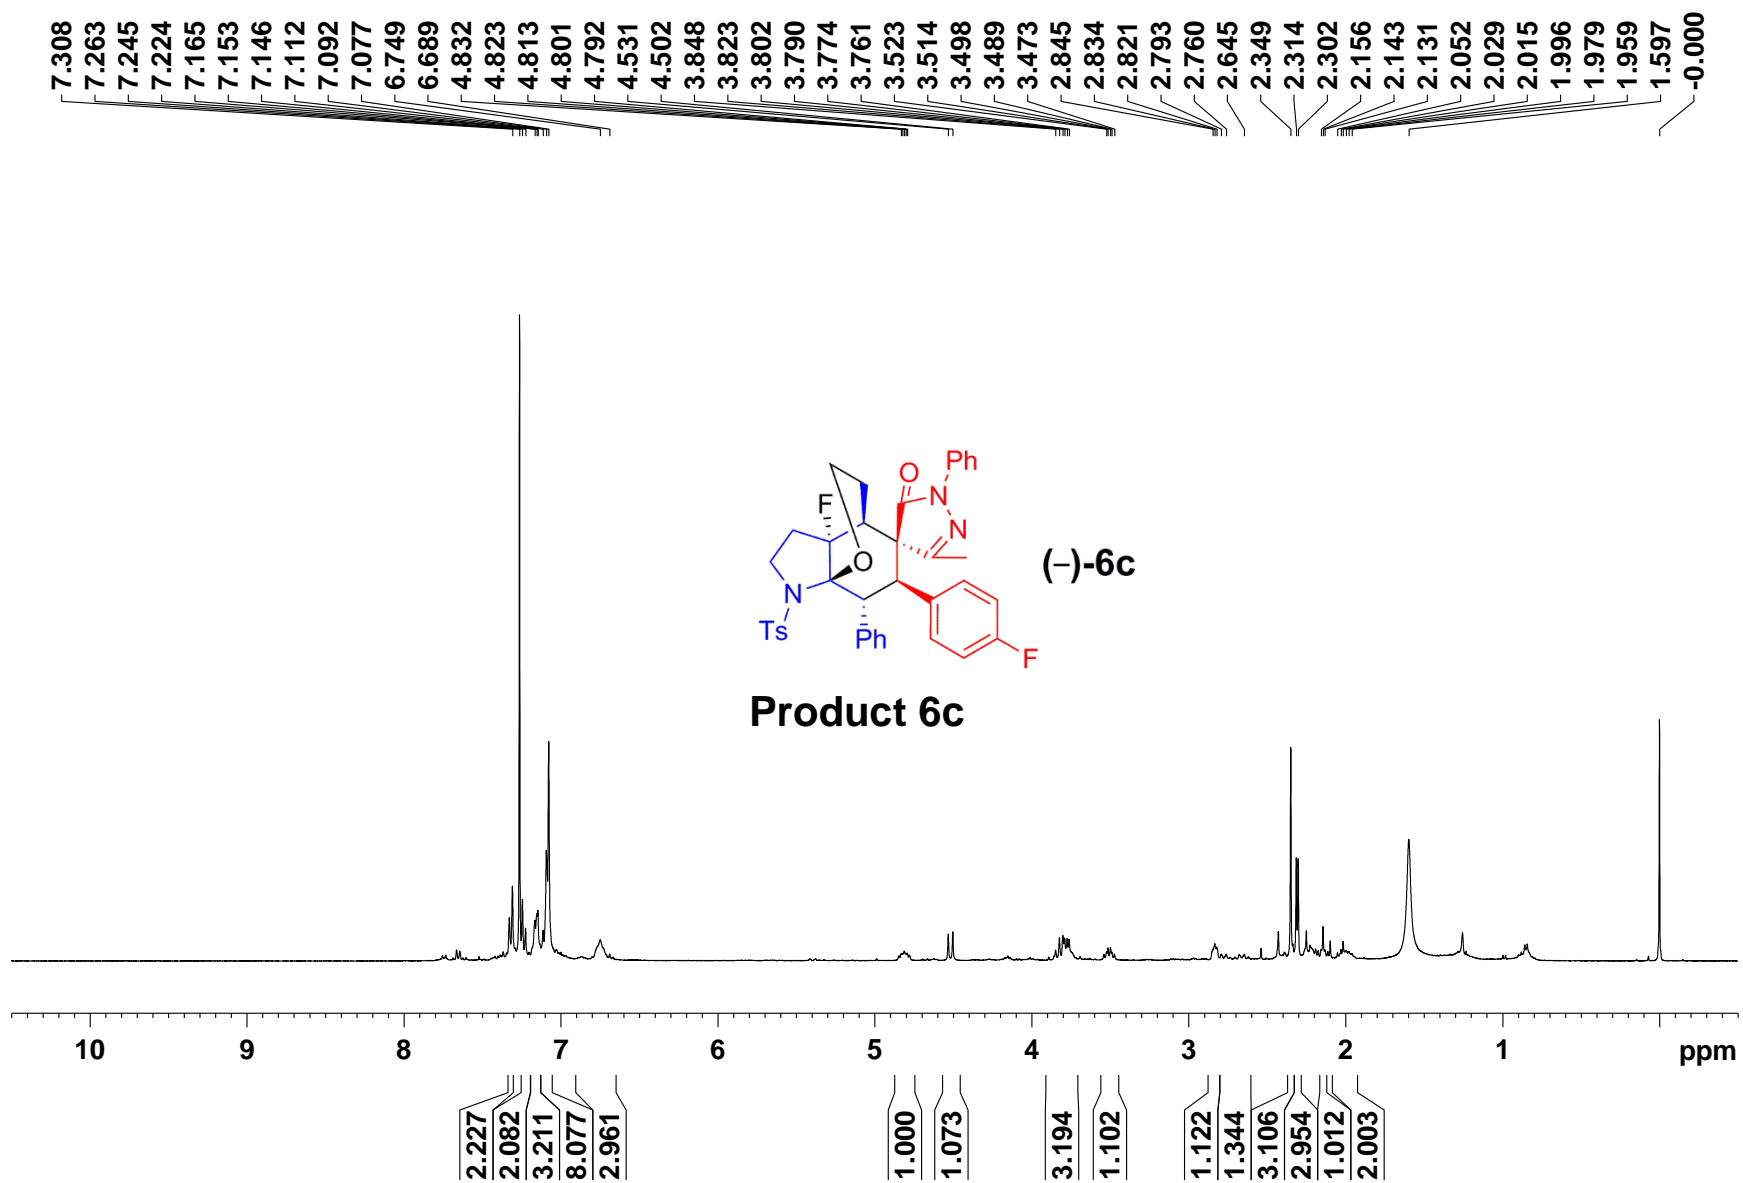

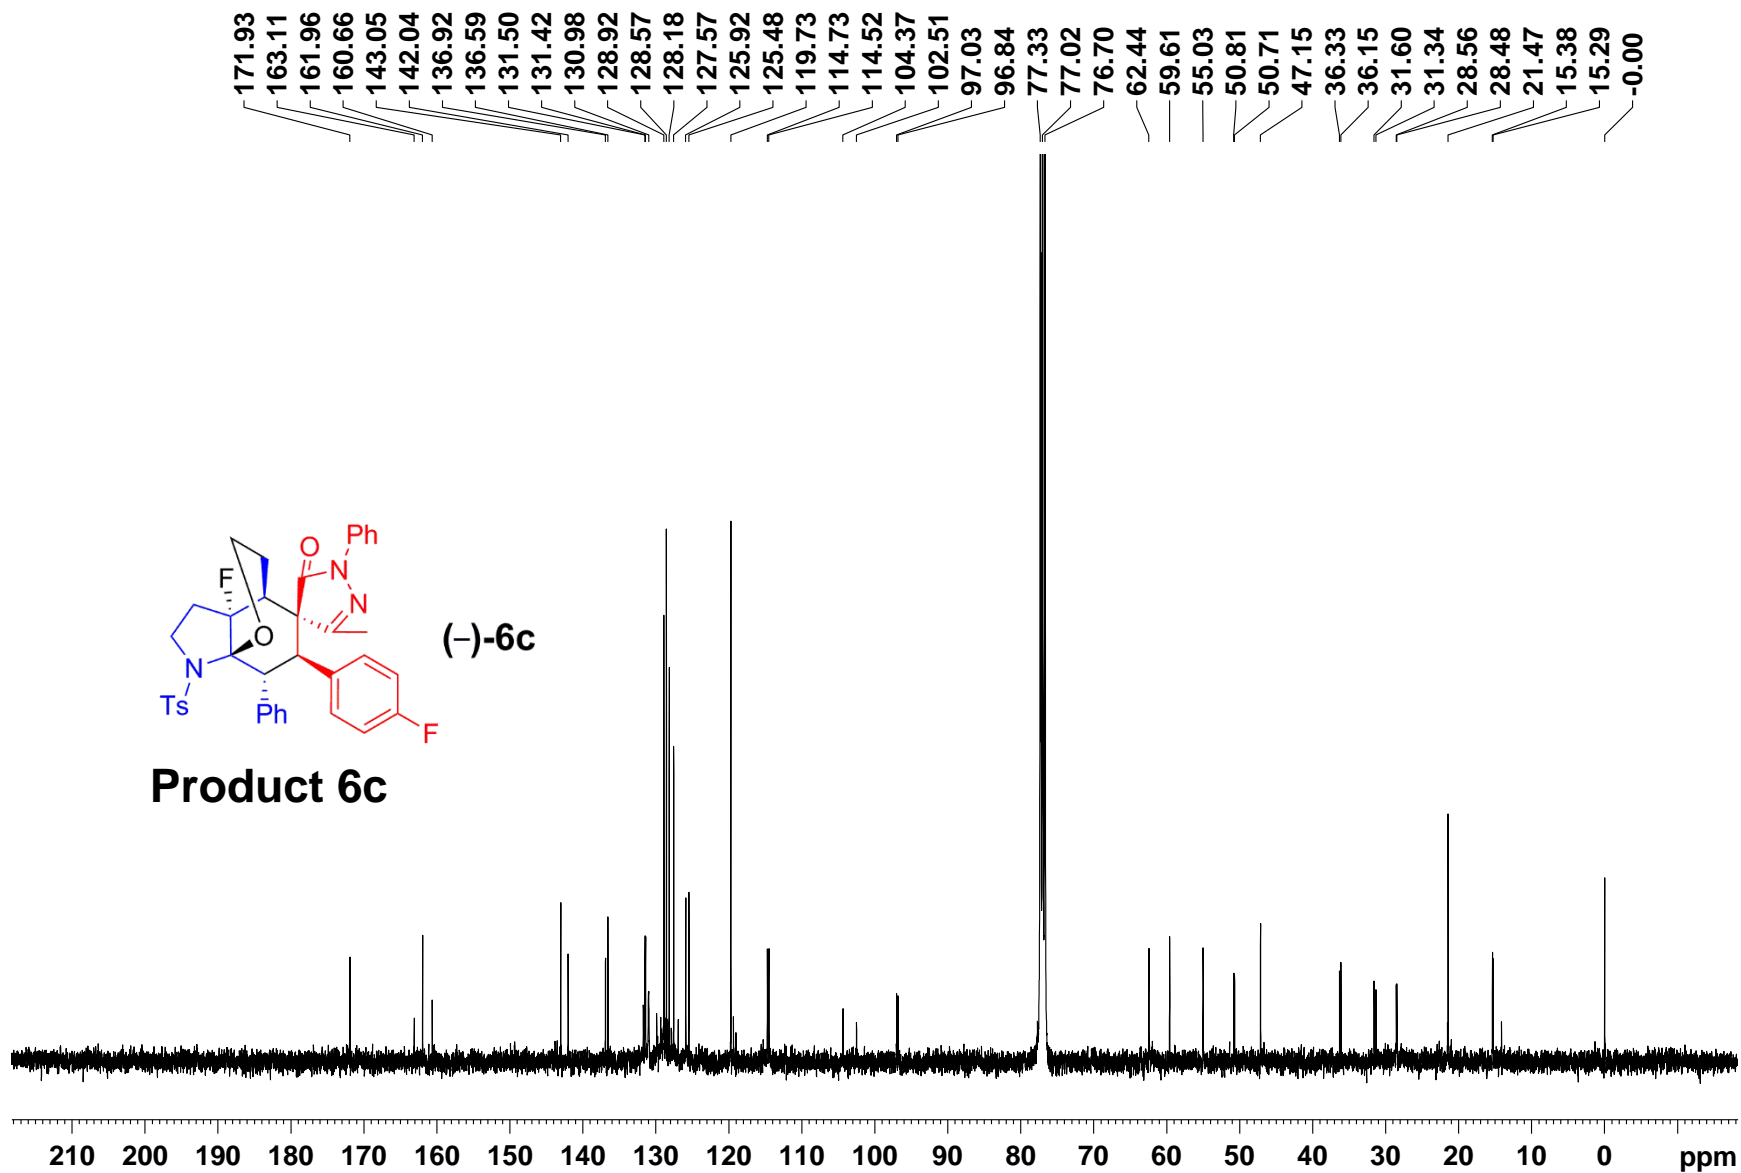

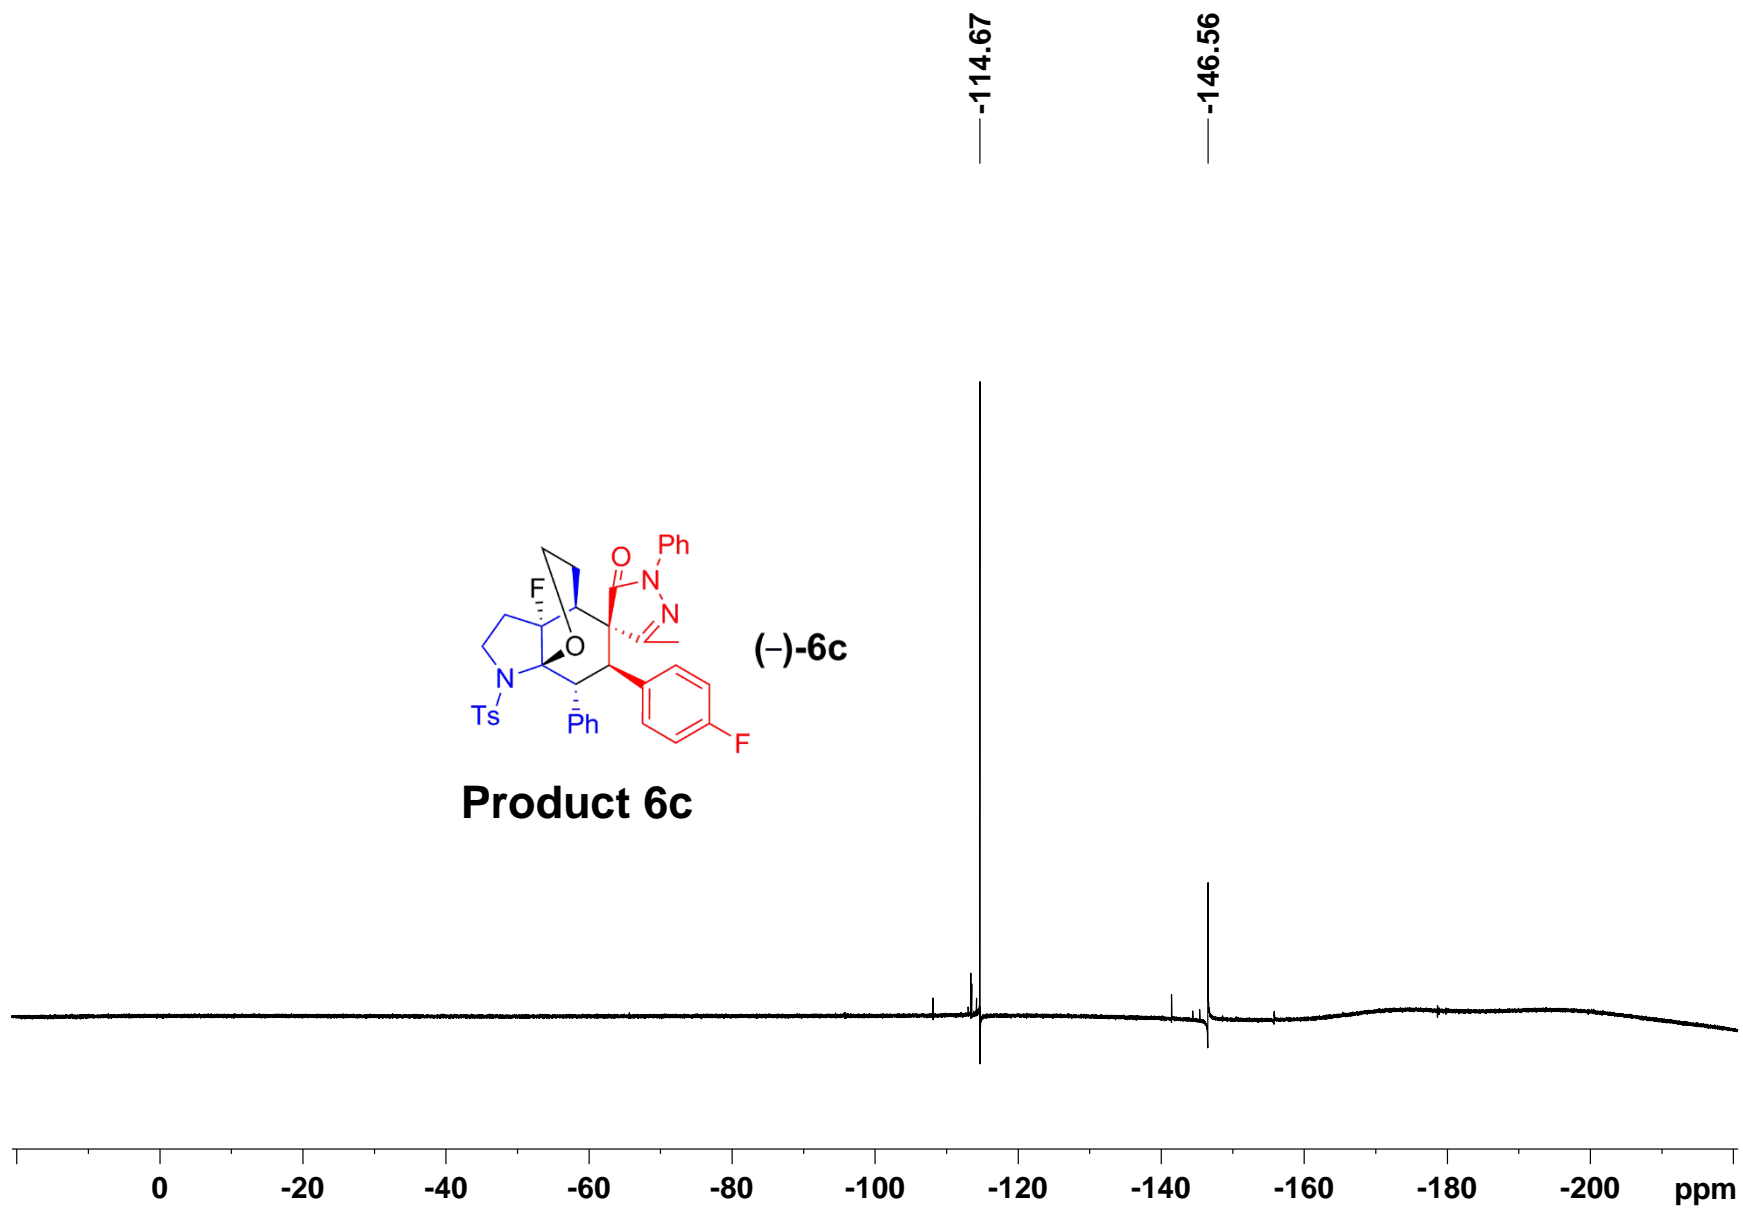

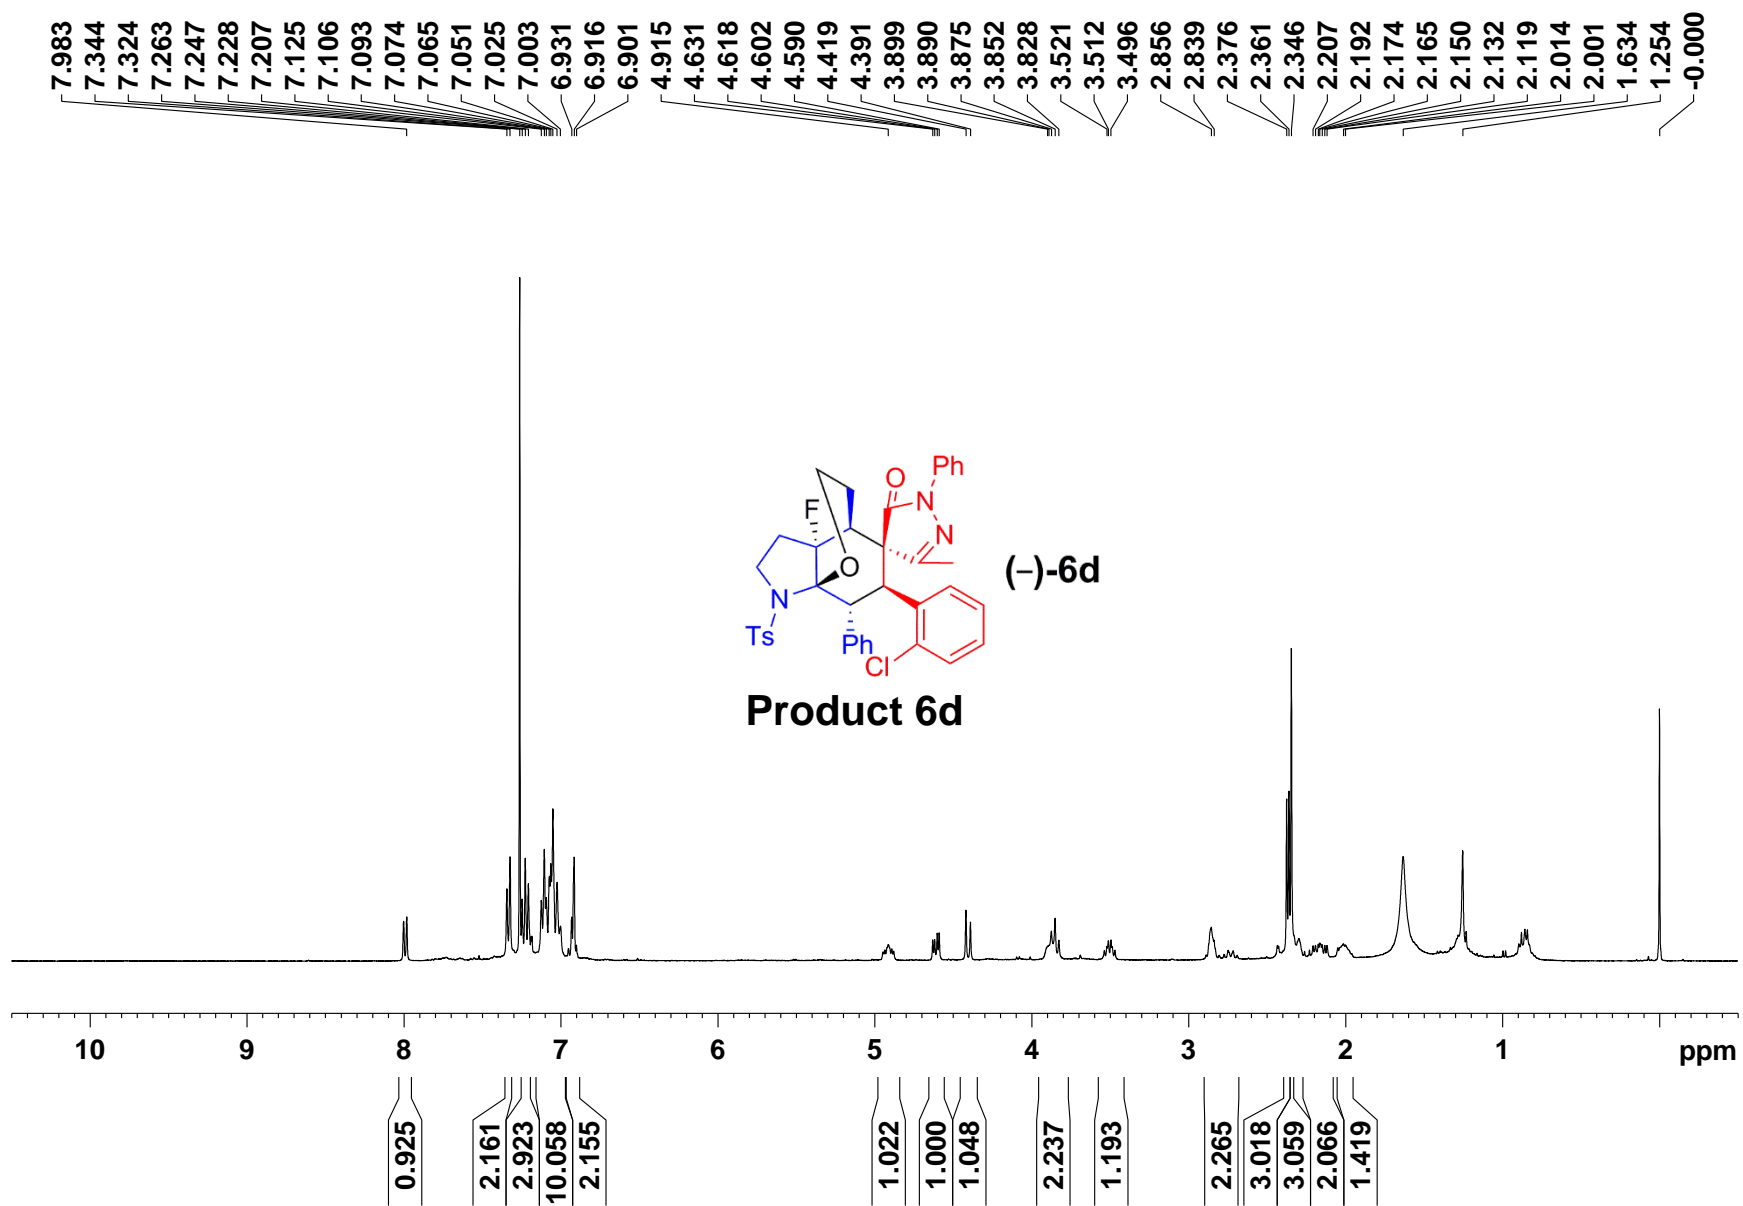

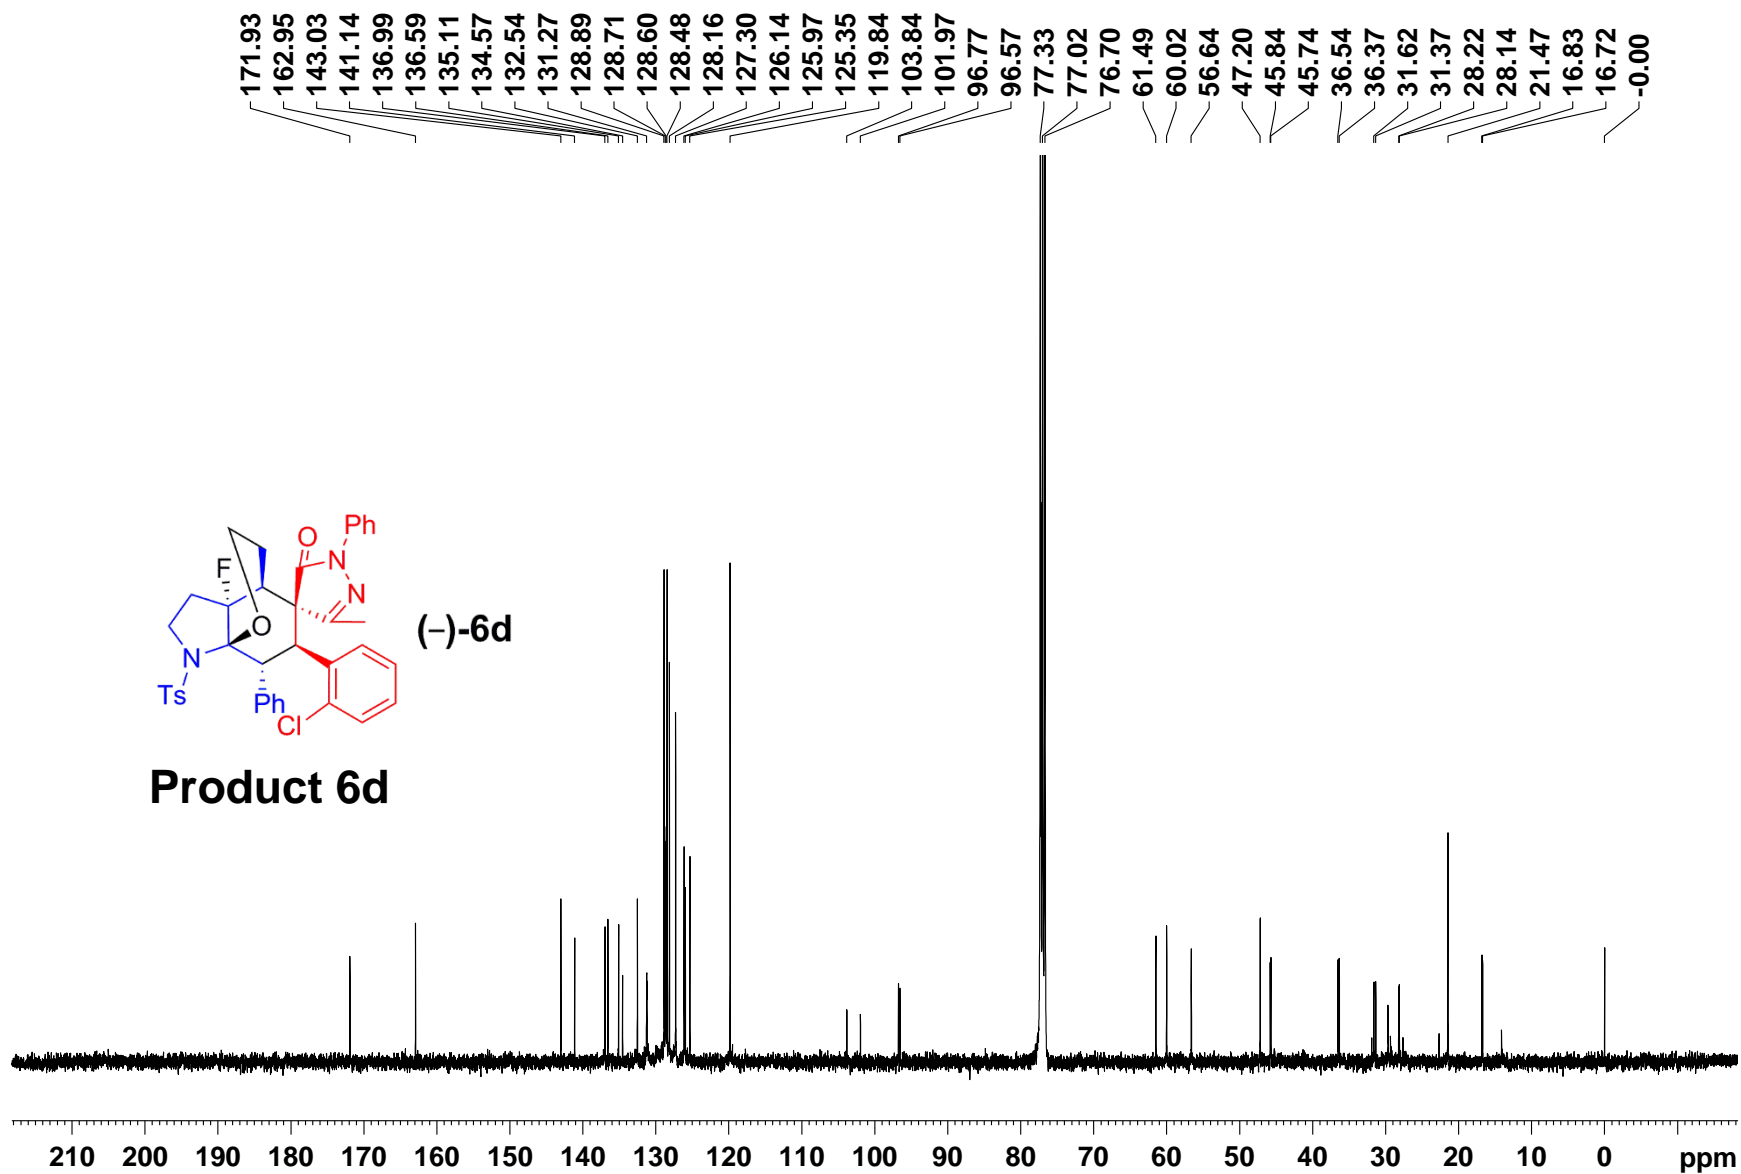

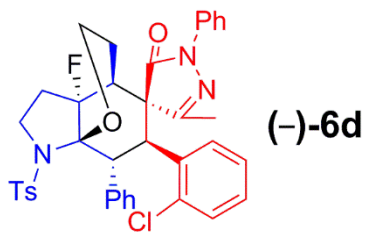

Product 6d

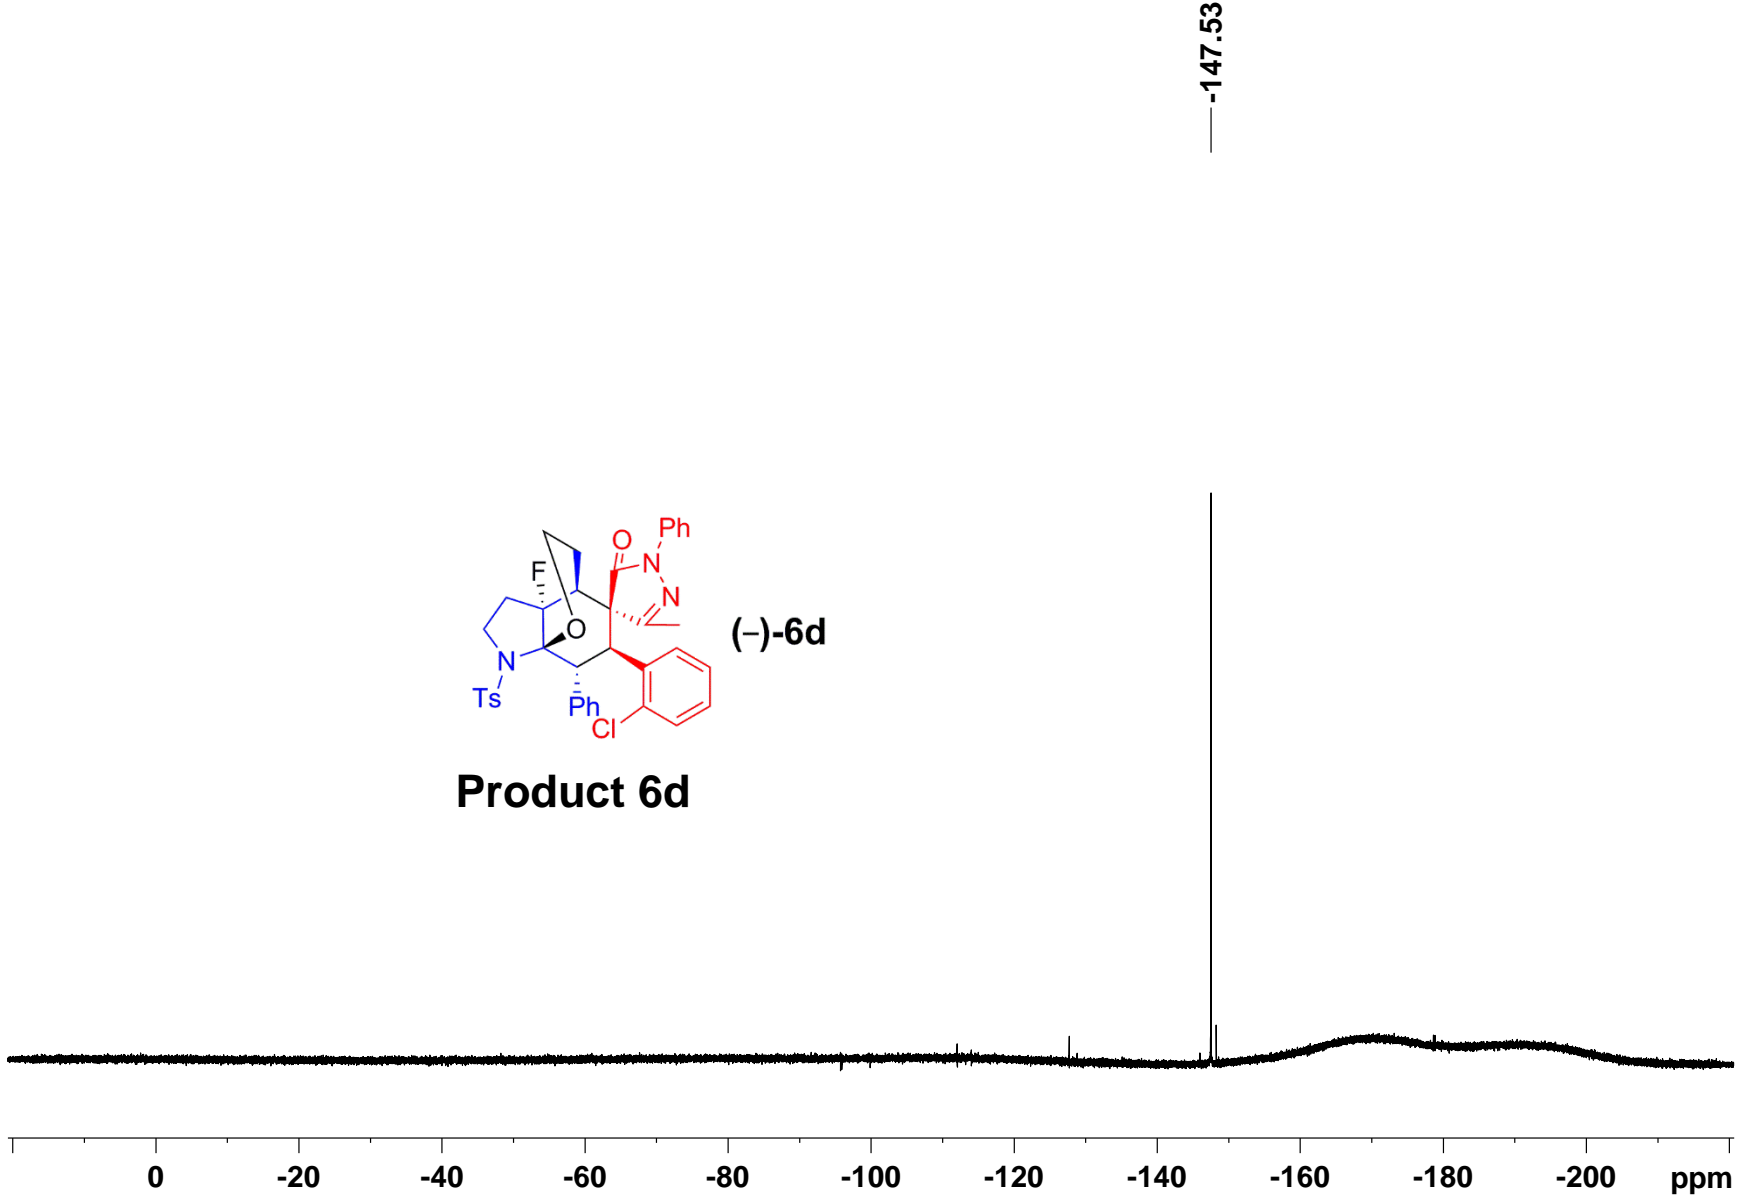

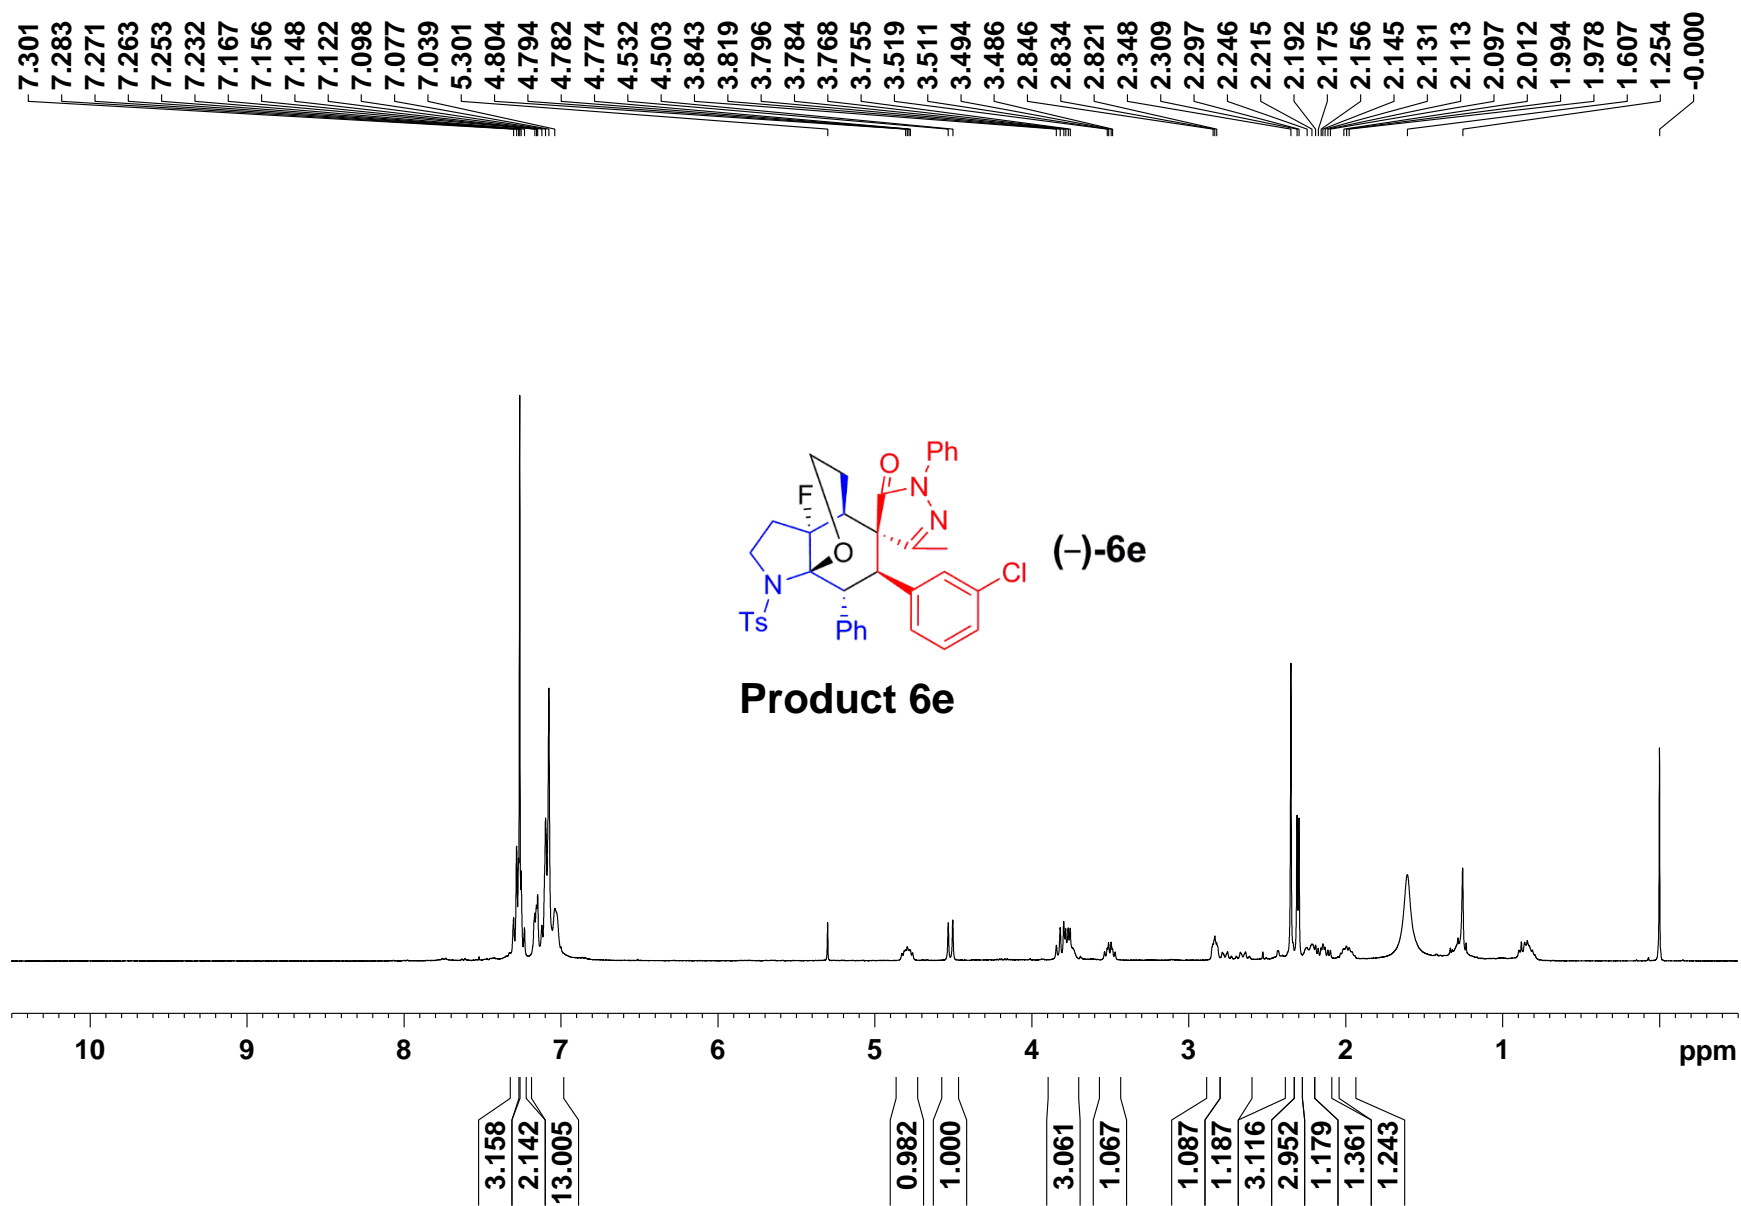



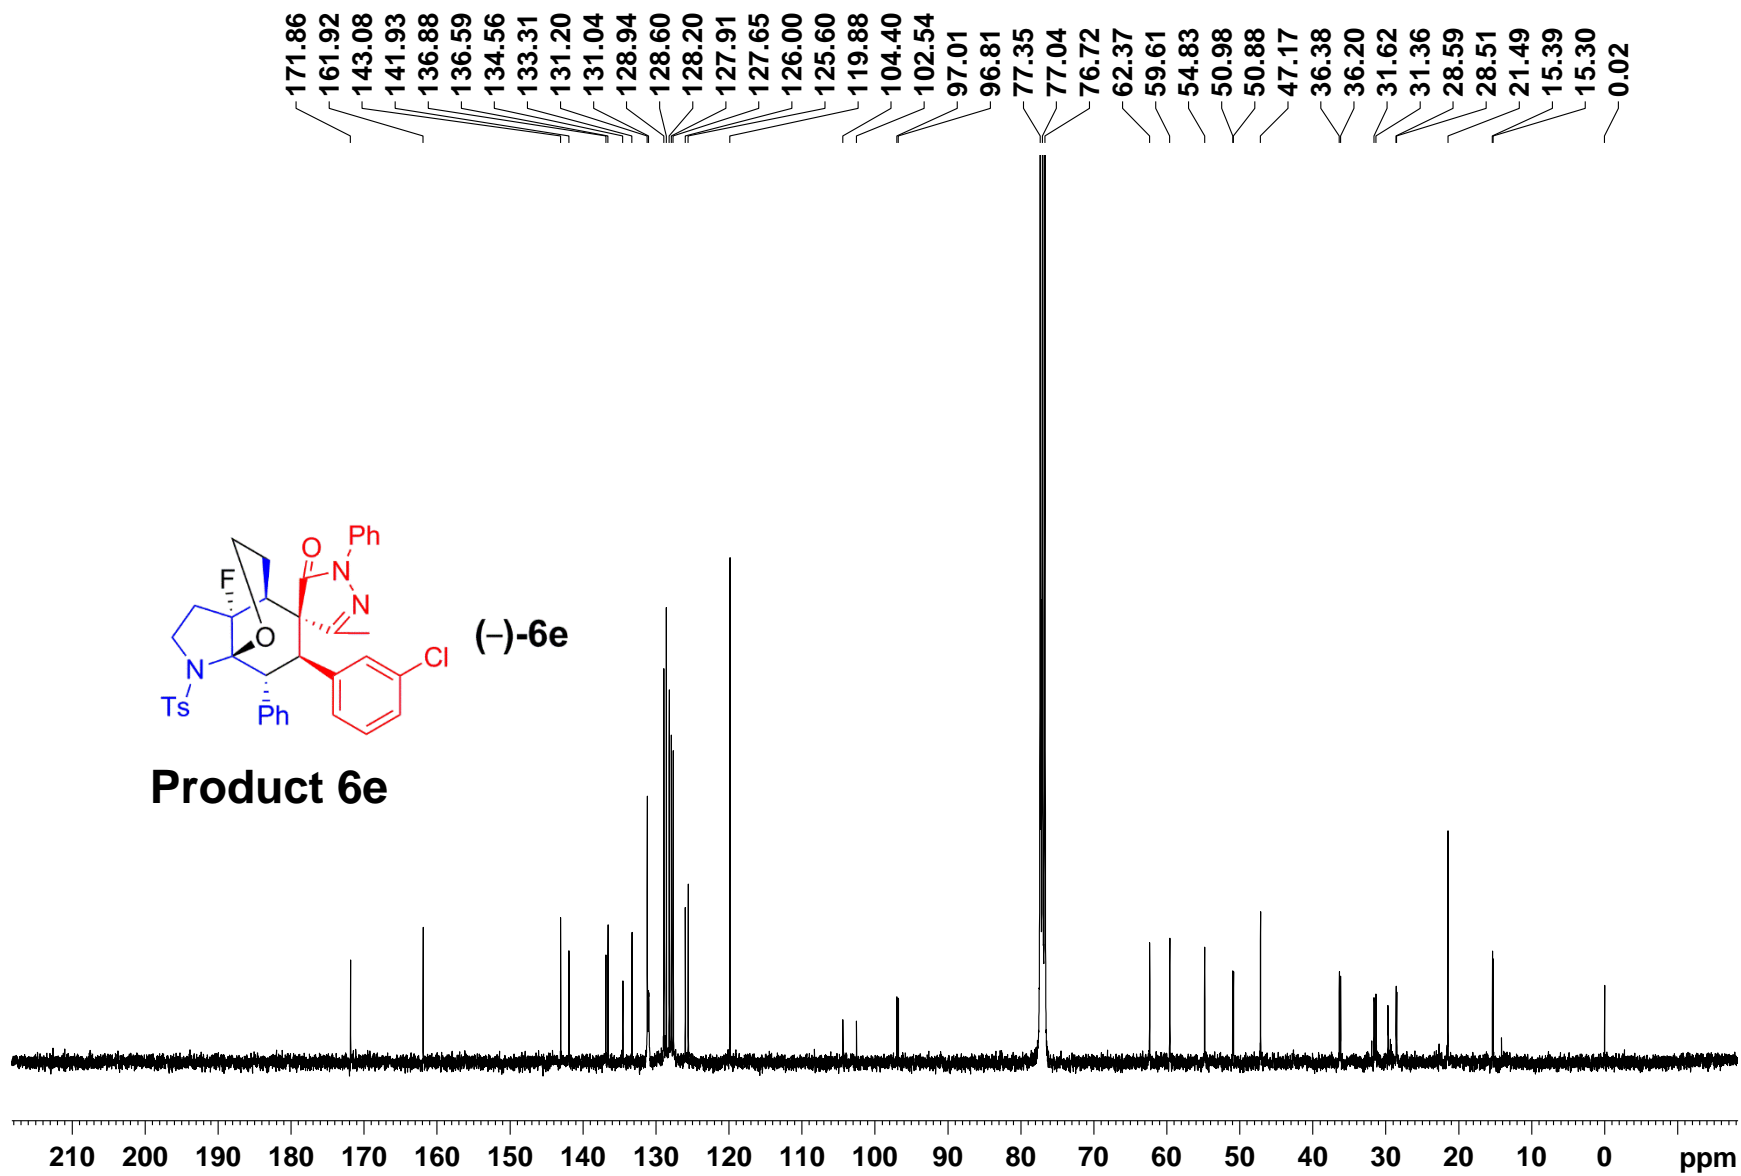

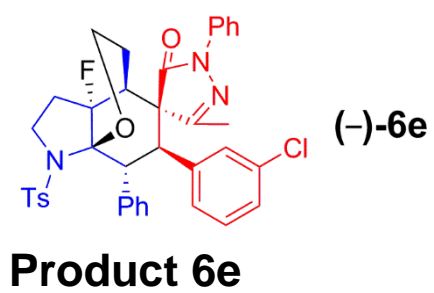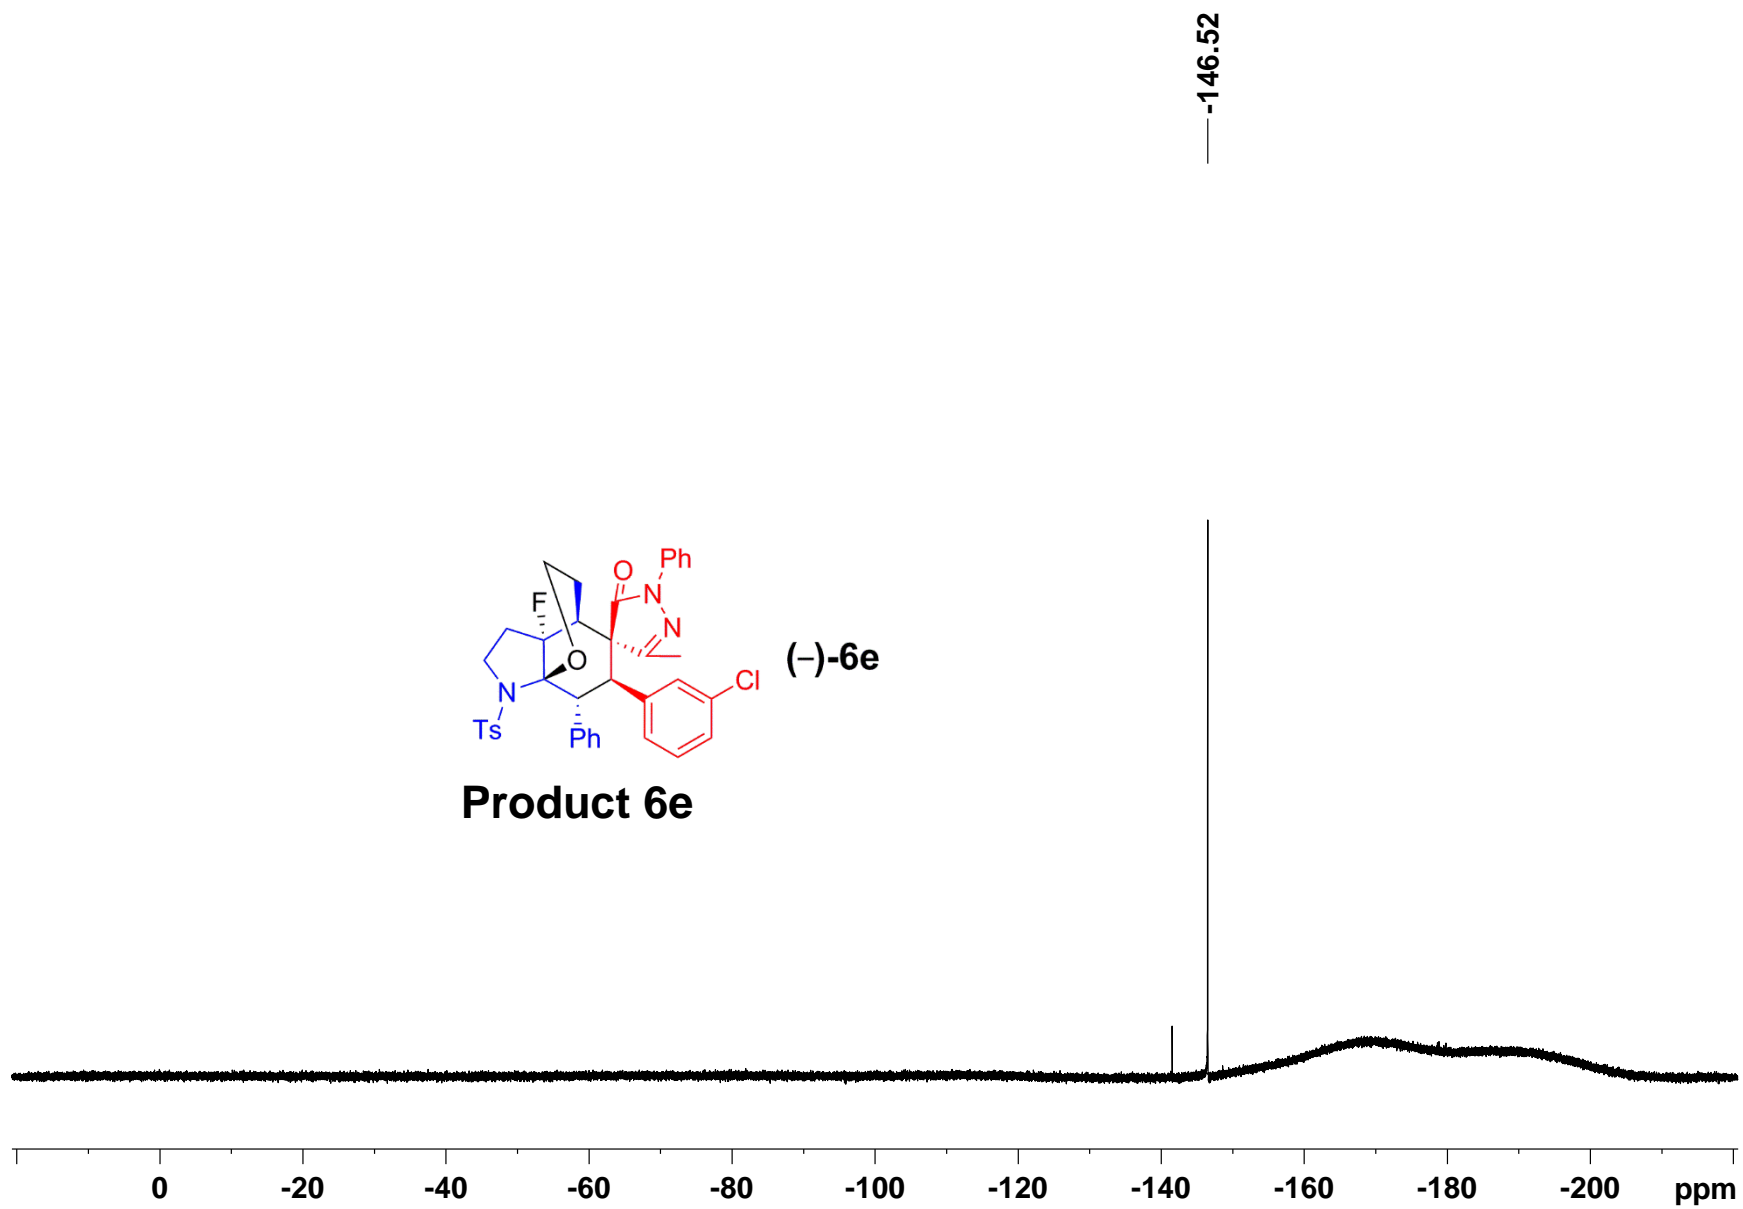

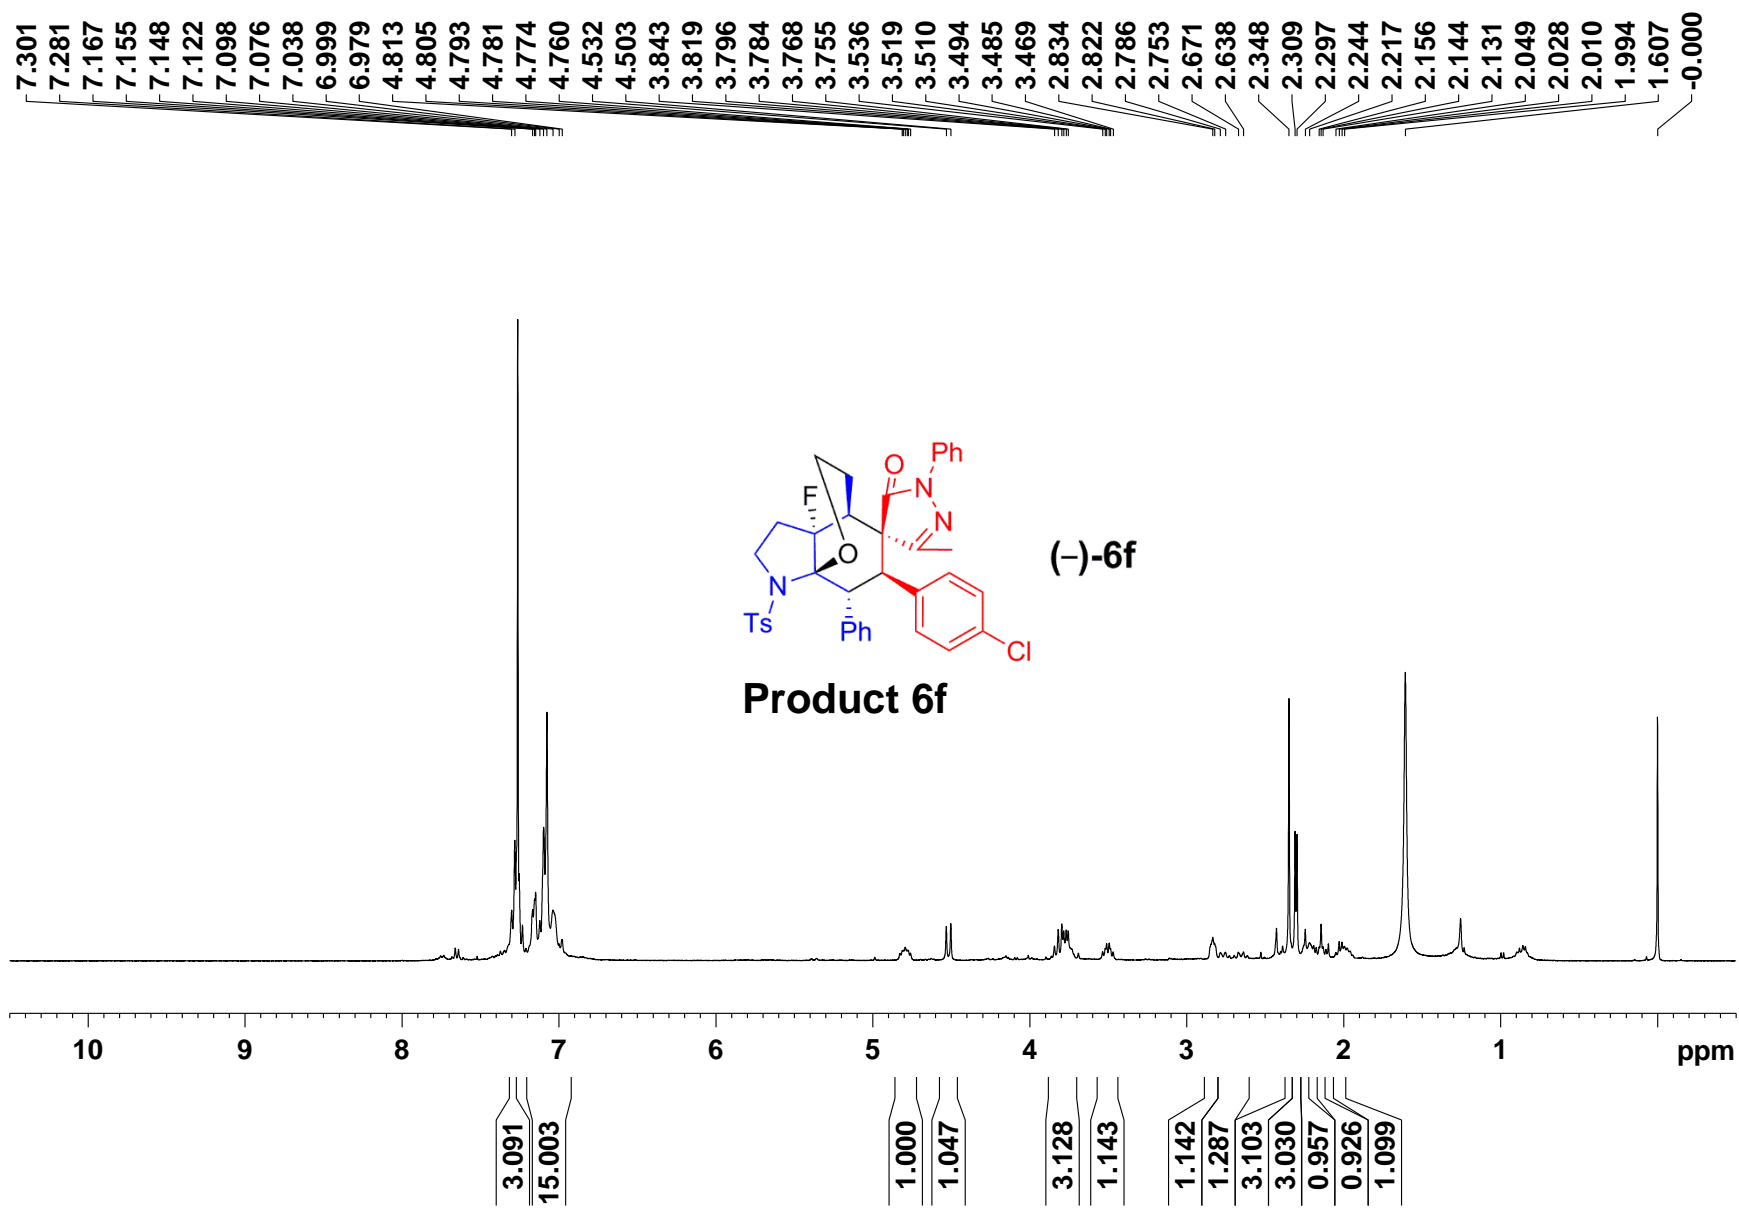

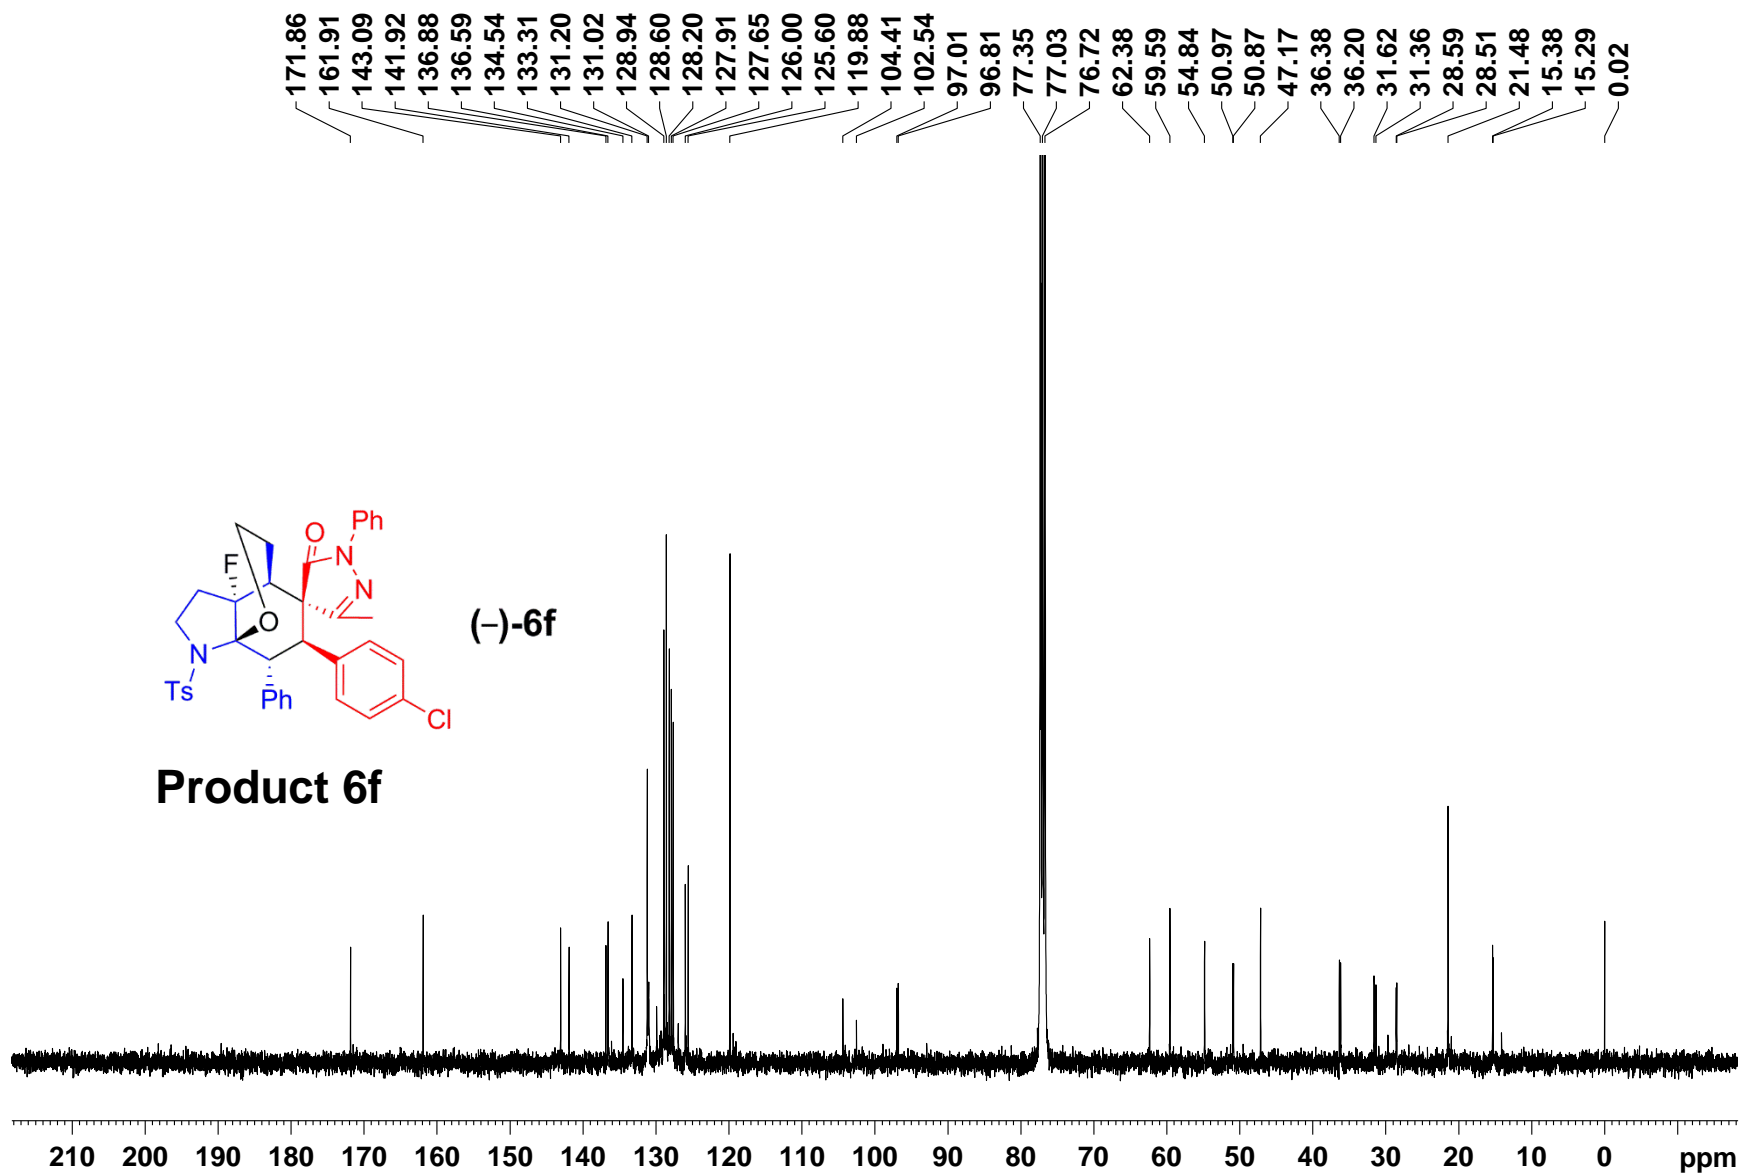

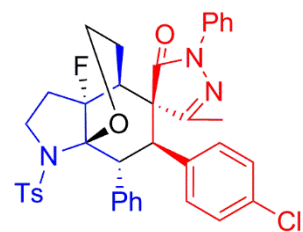

(-)-6f

Product 6f

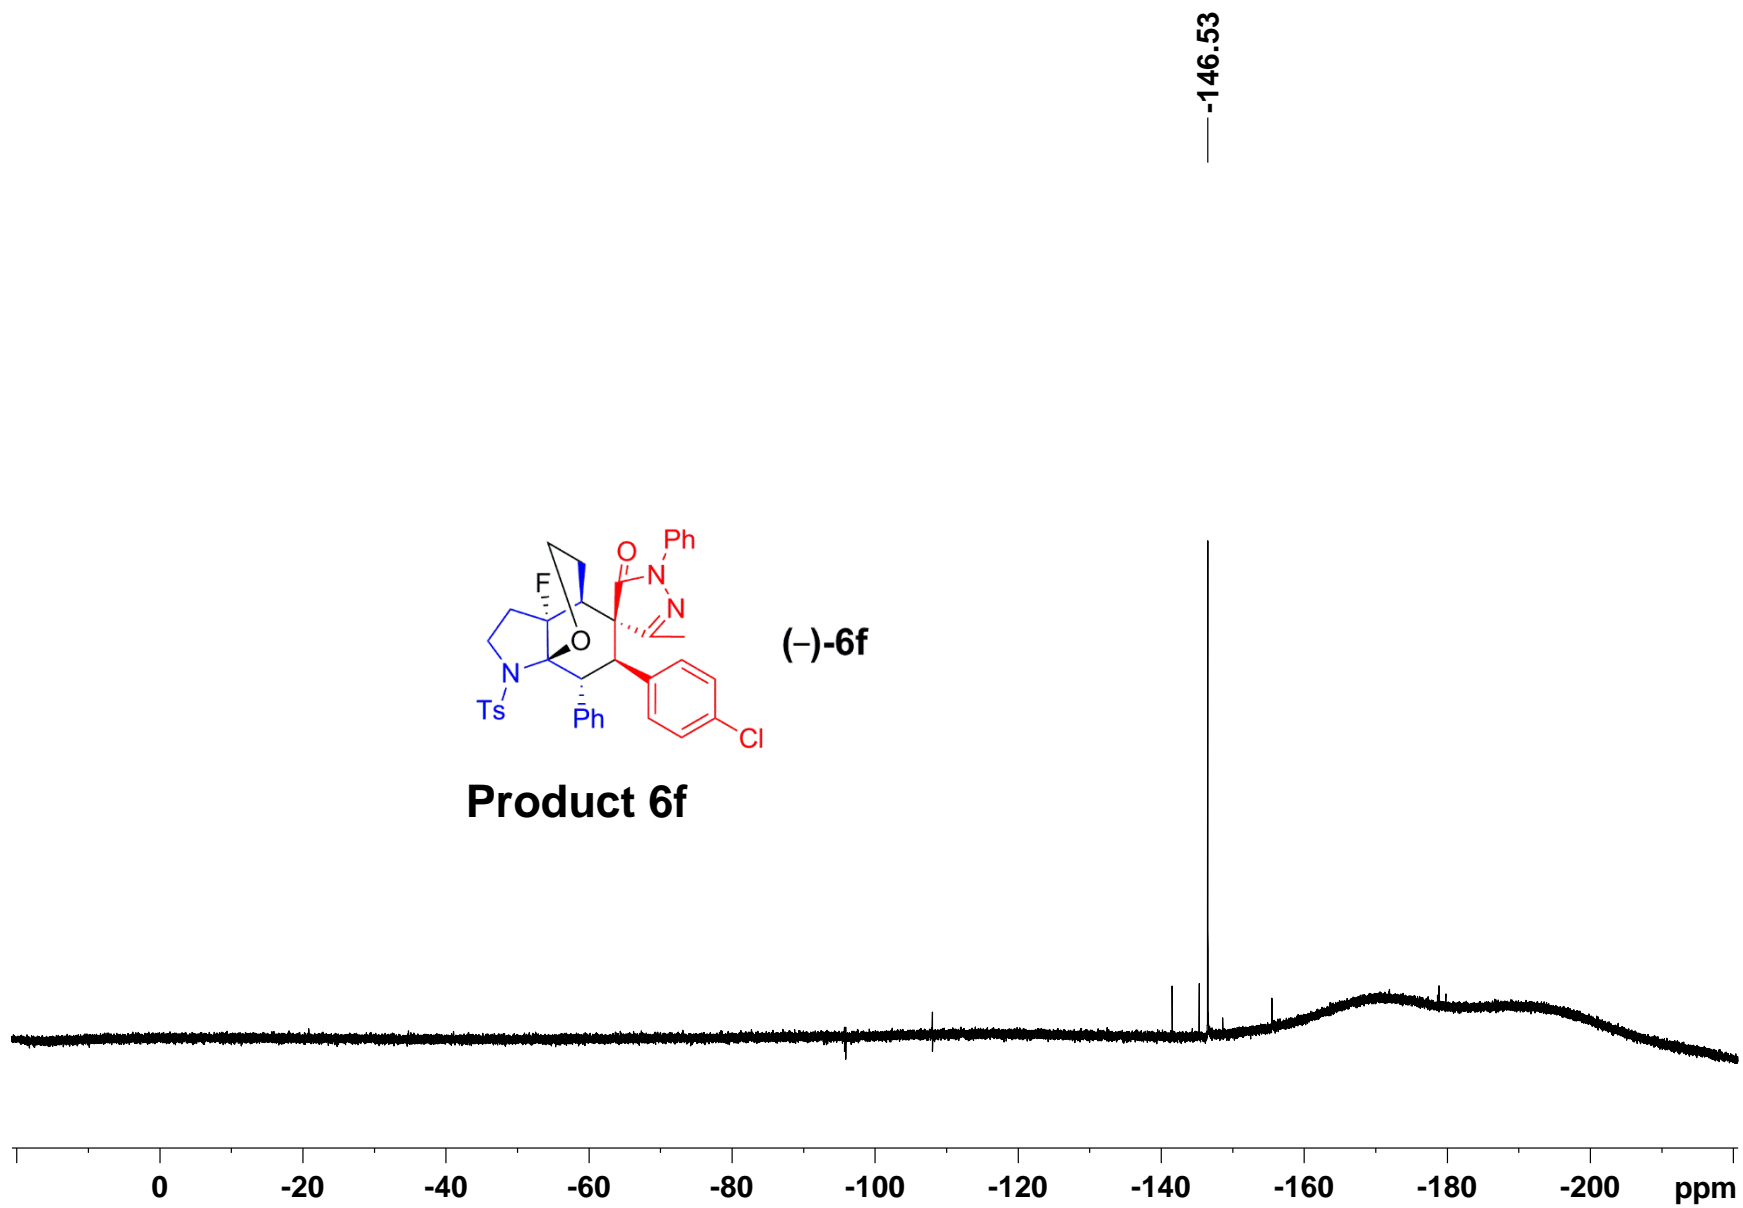

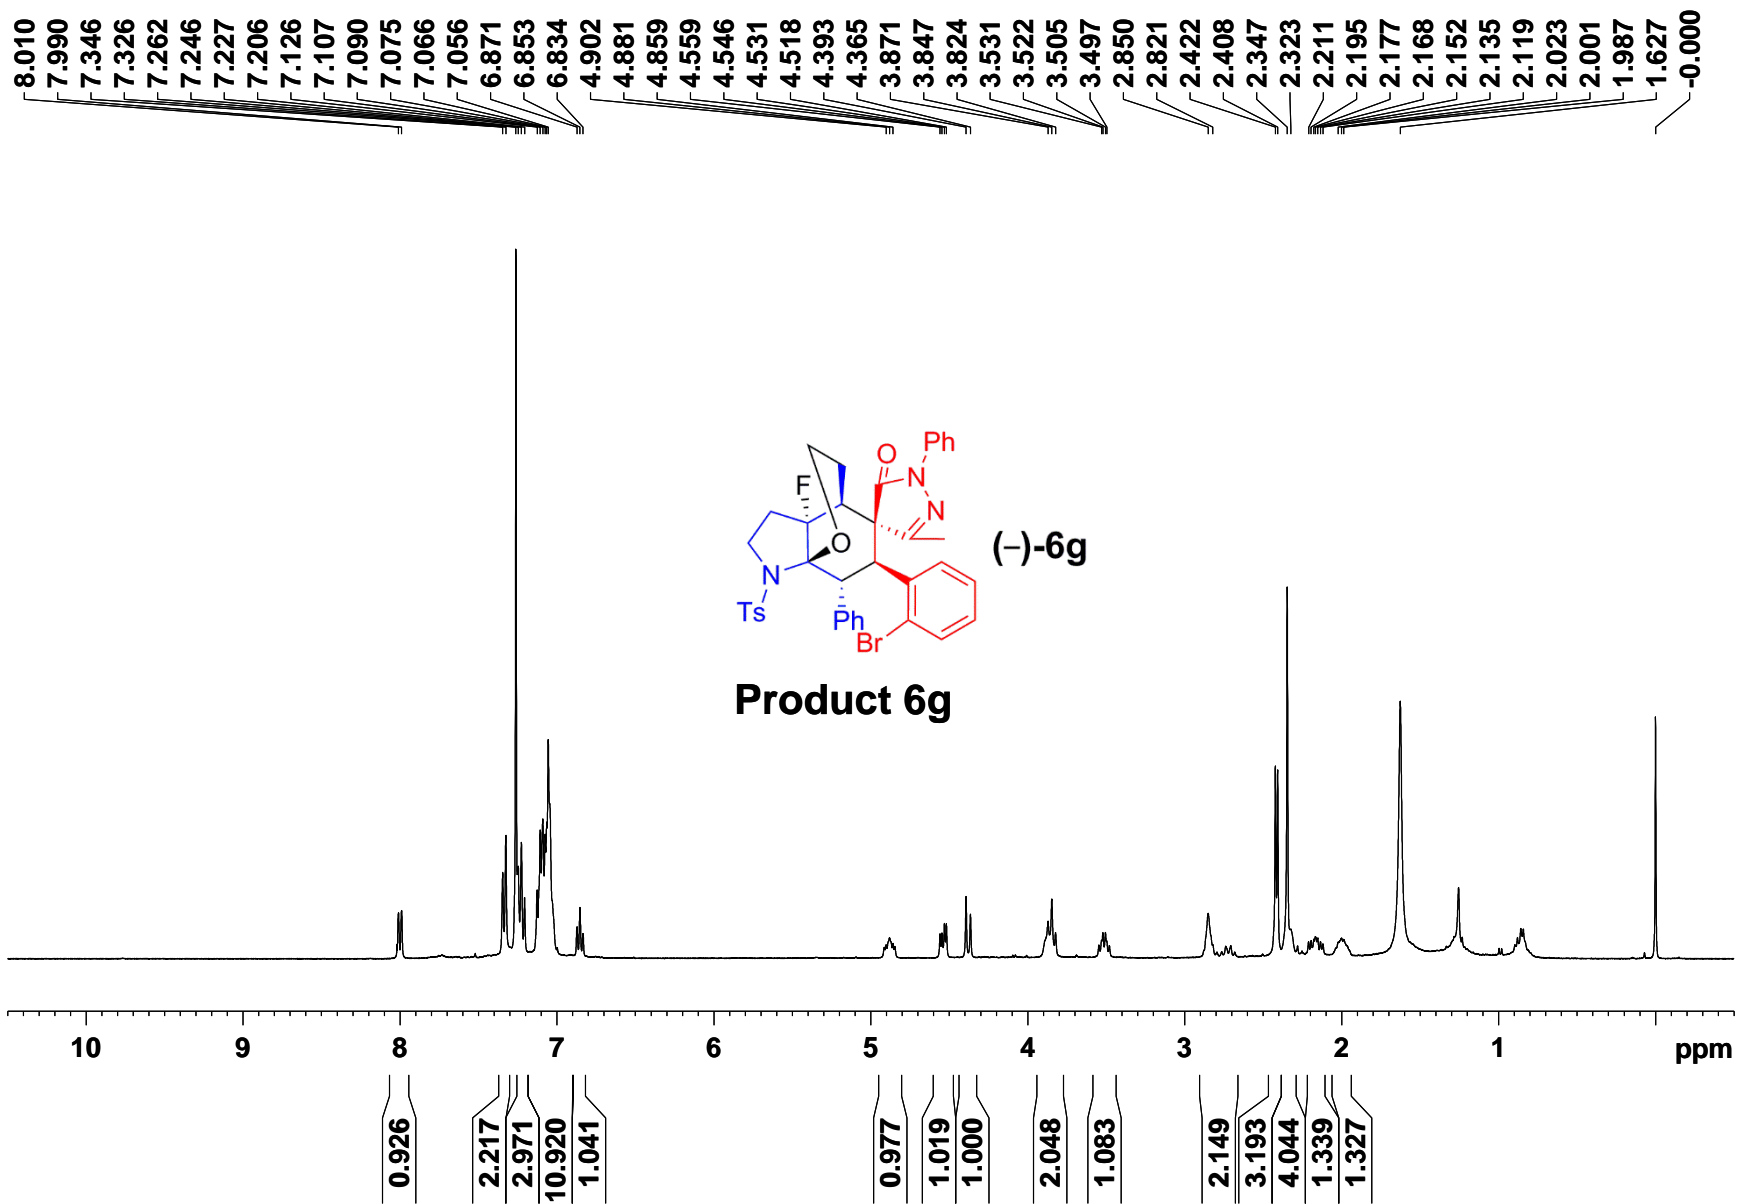

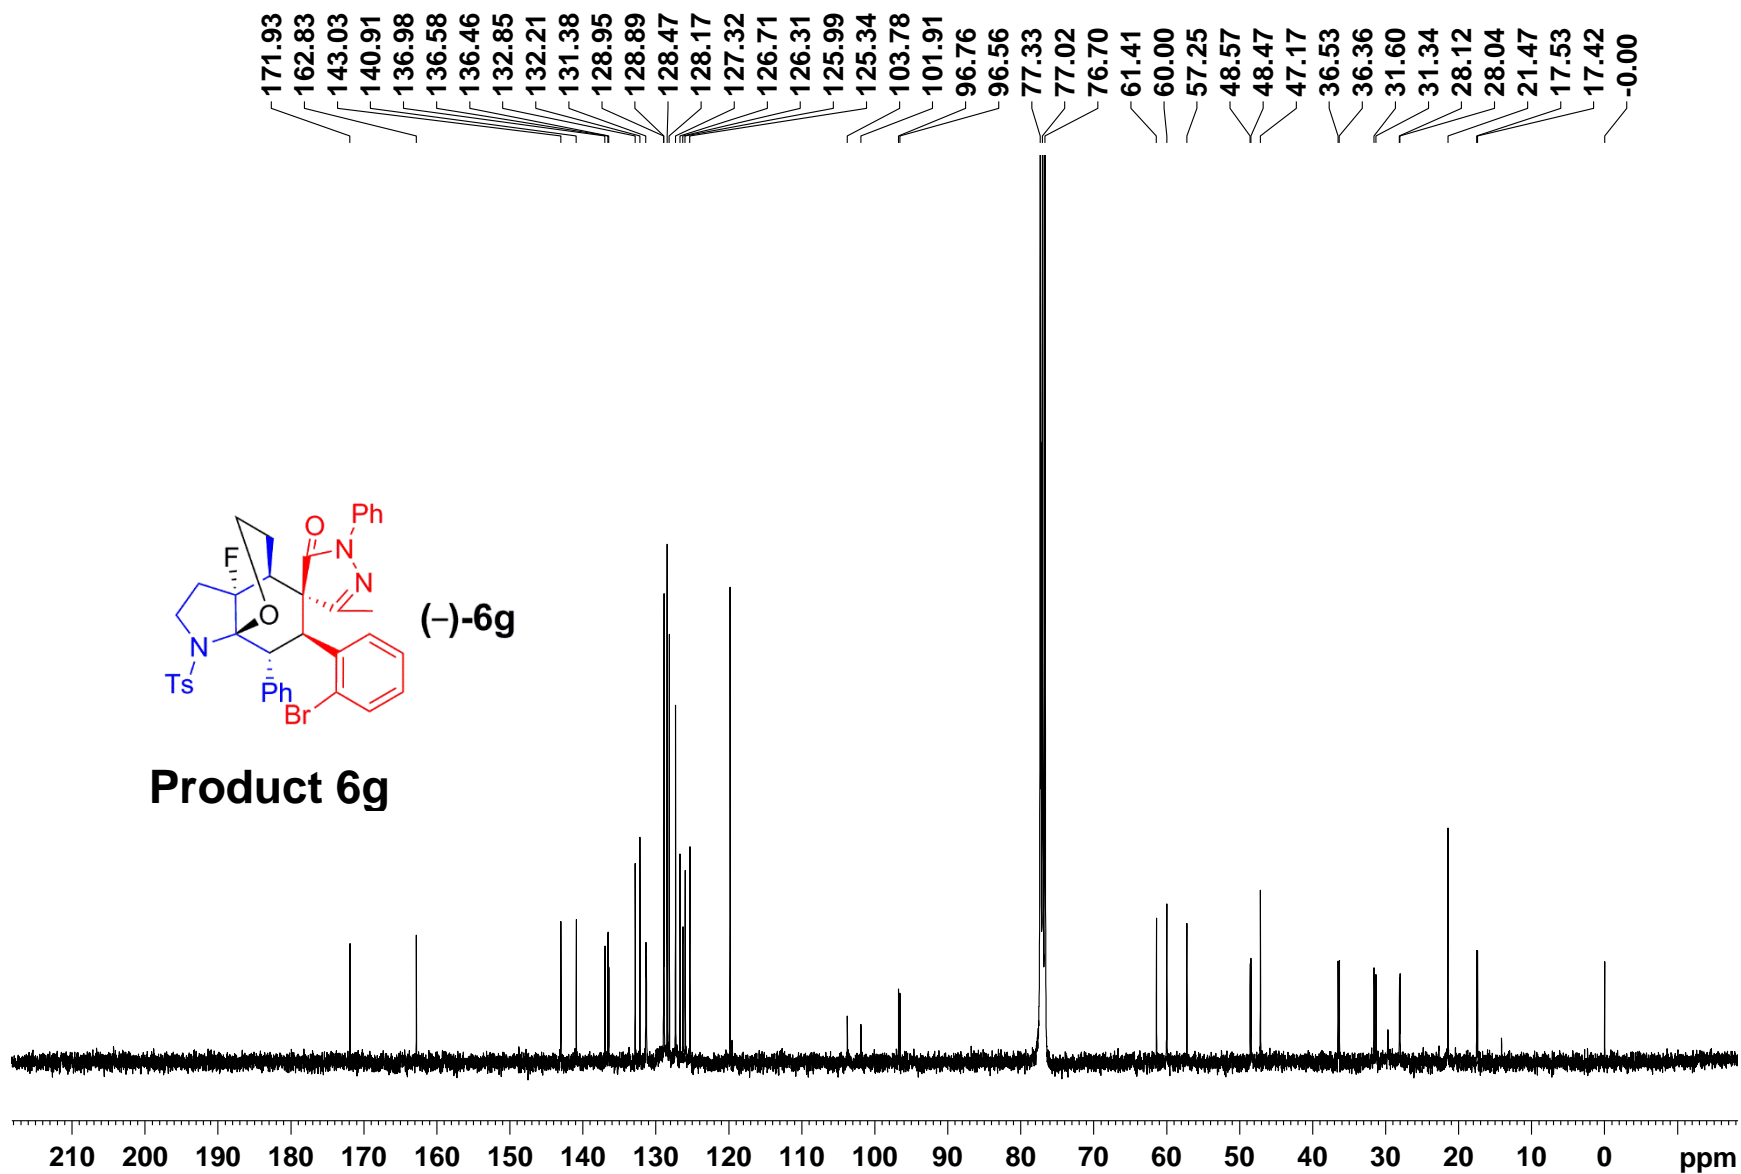

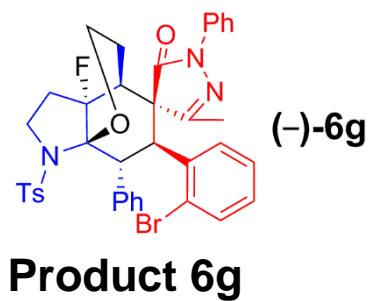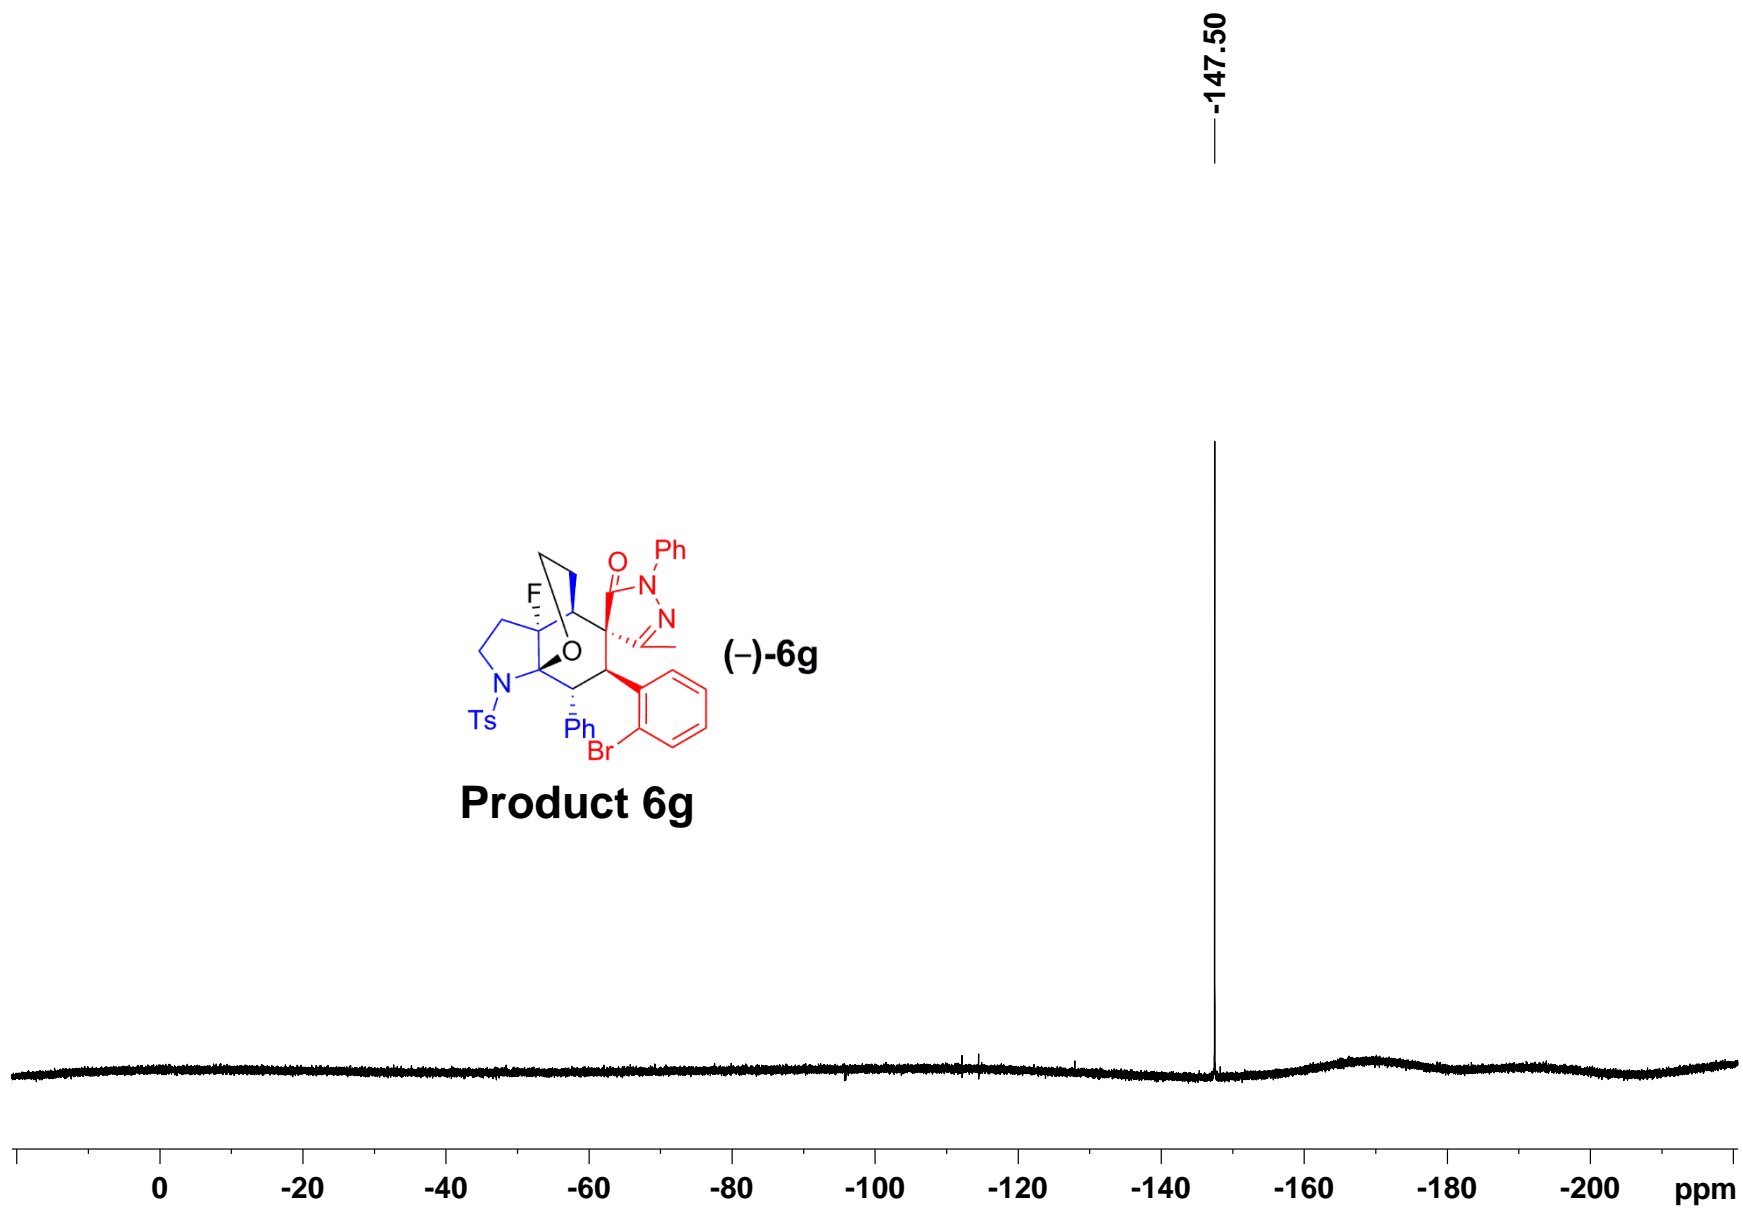



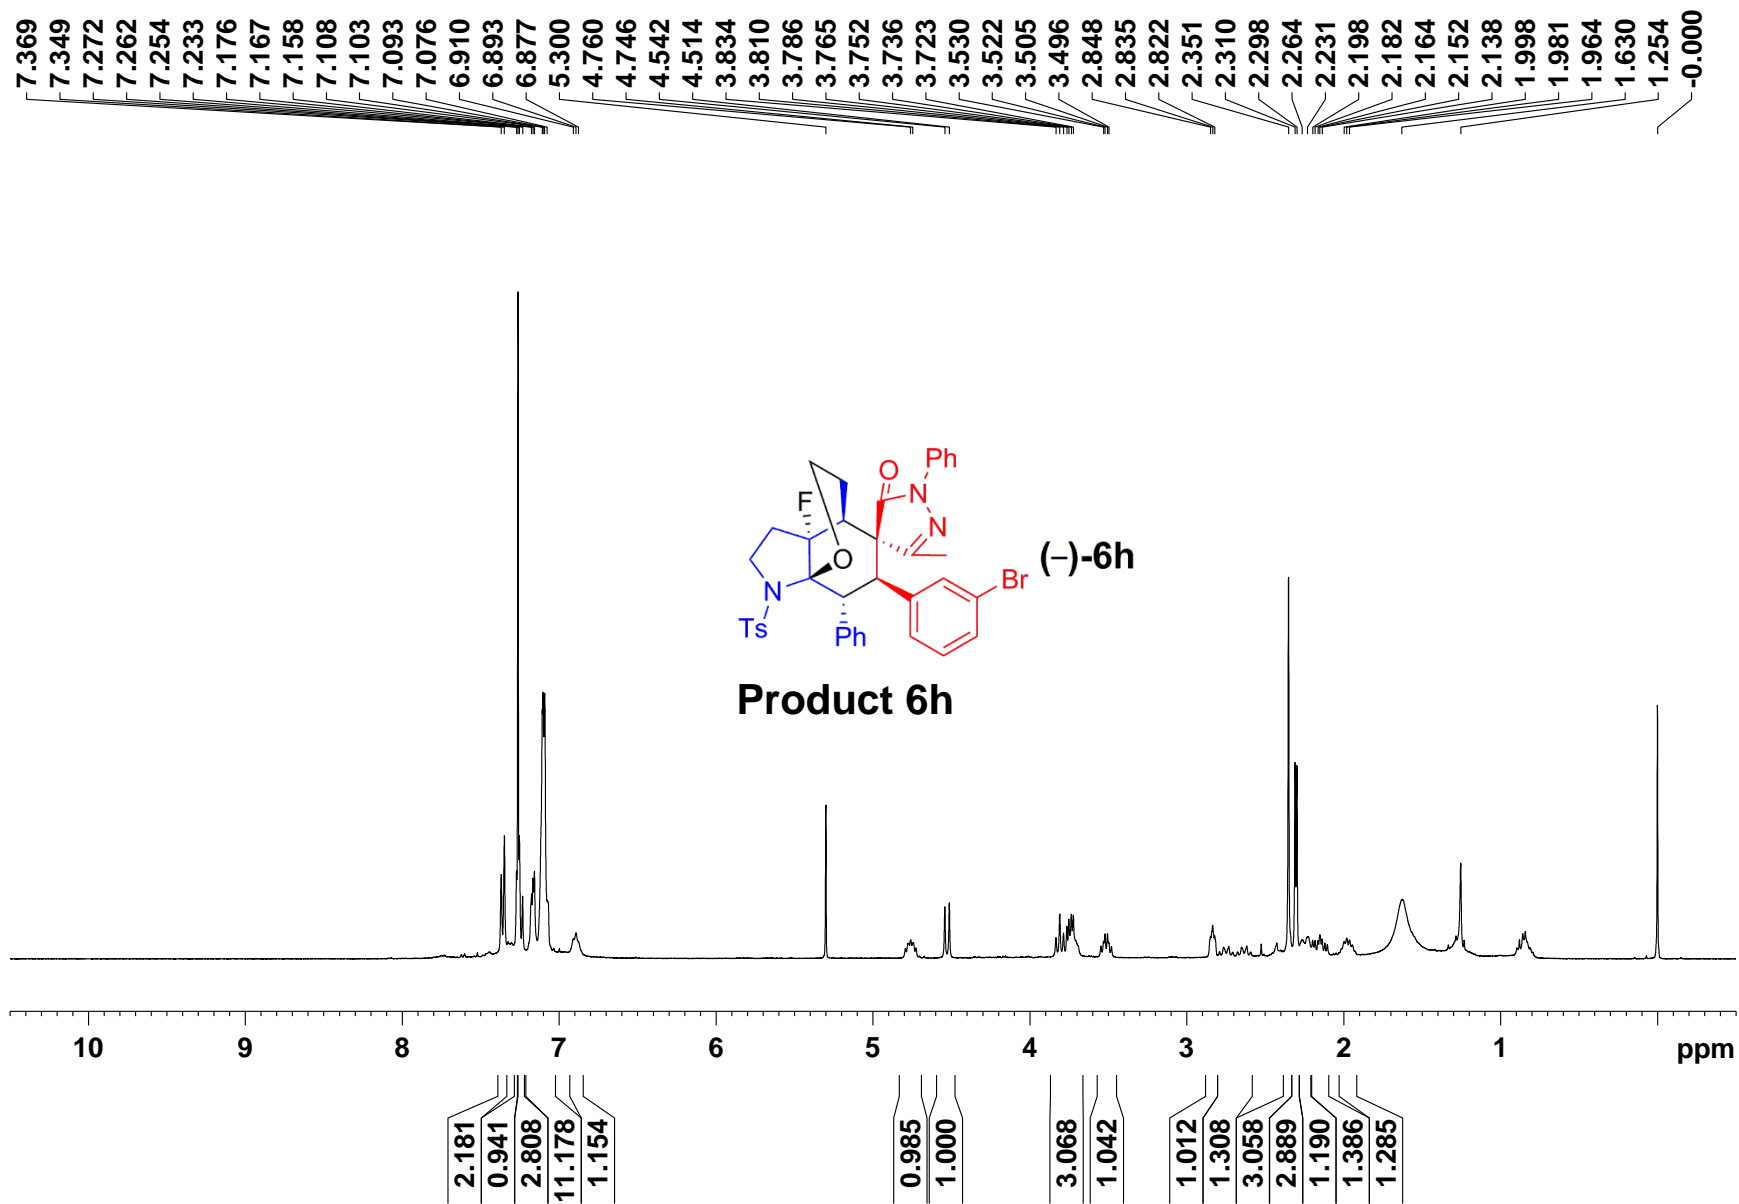

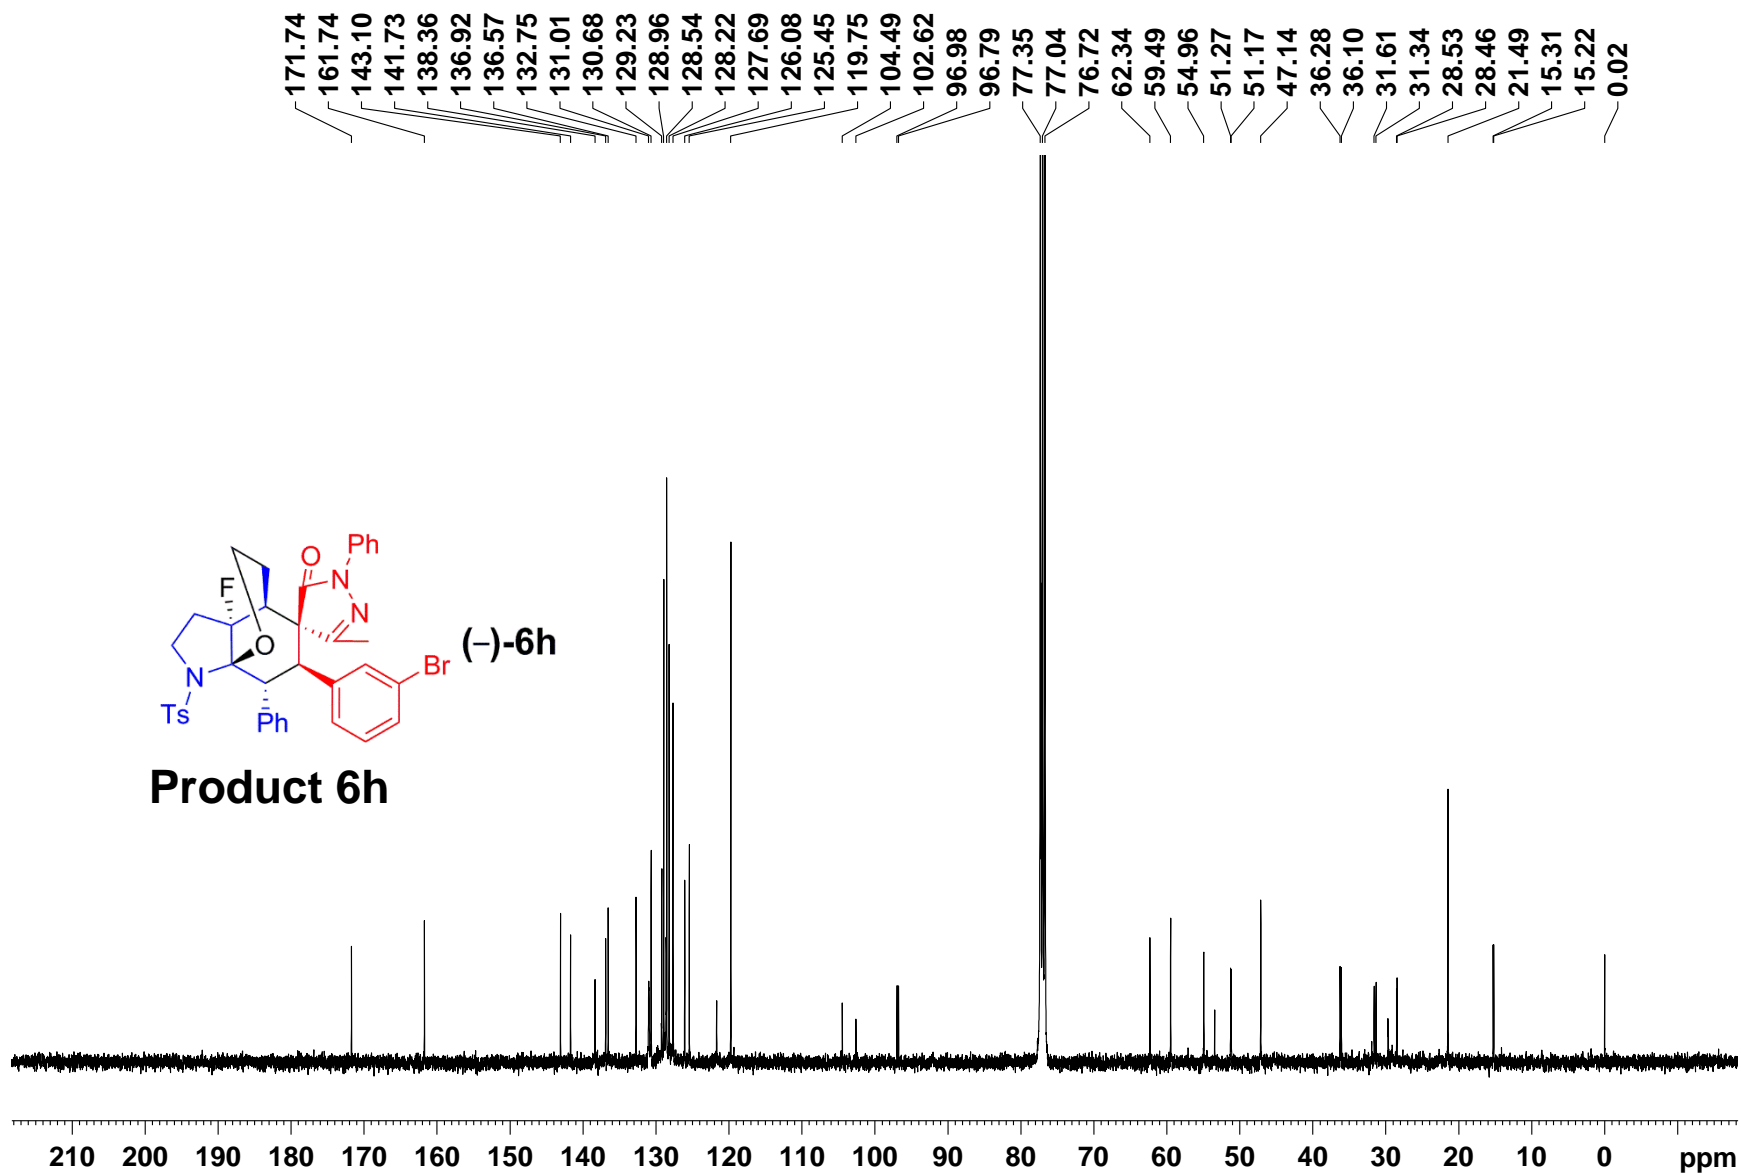

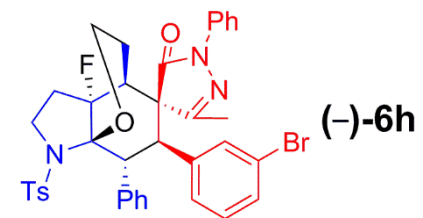

Product 6h

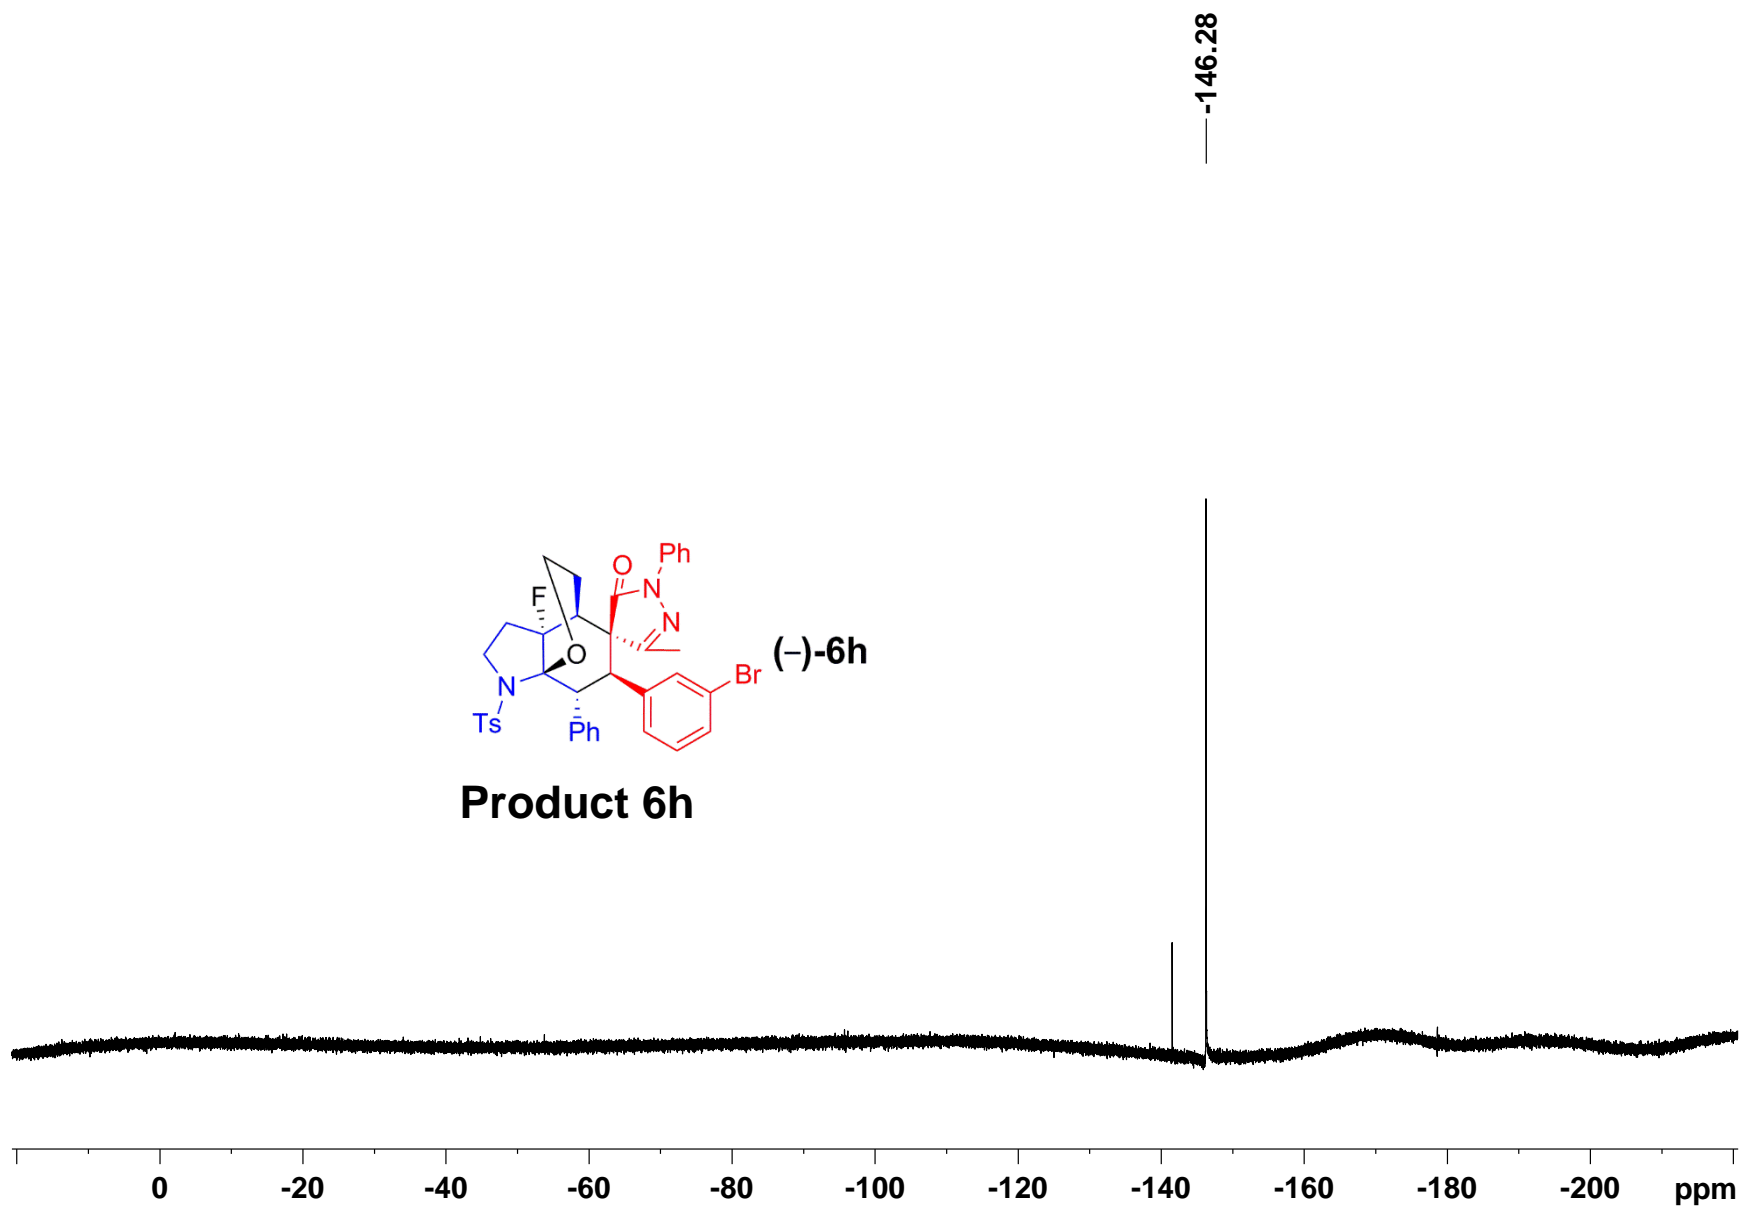

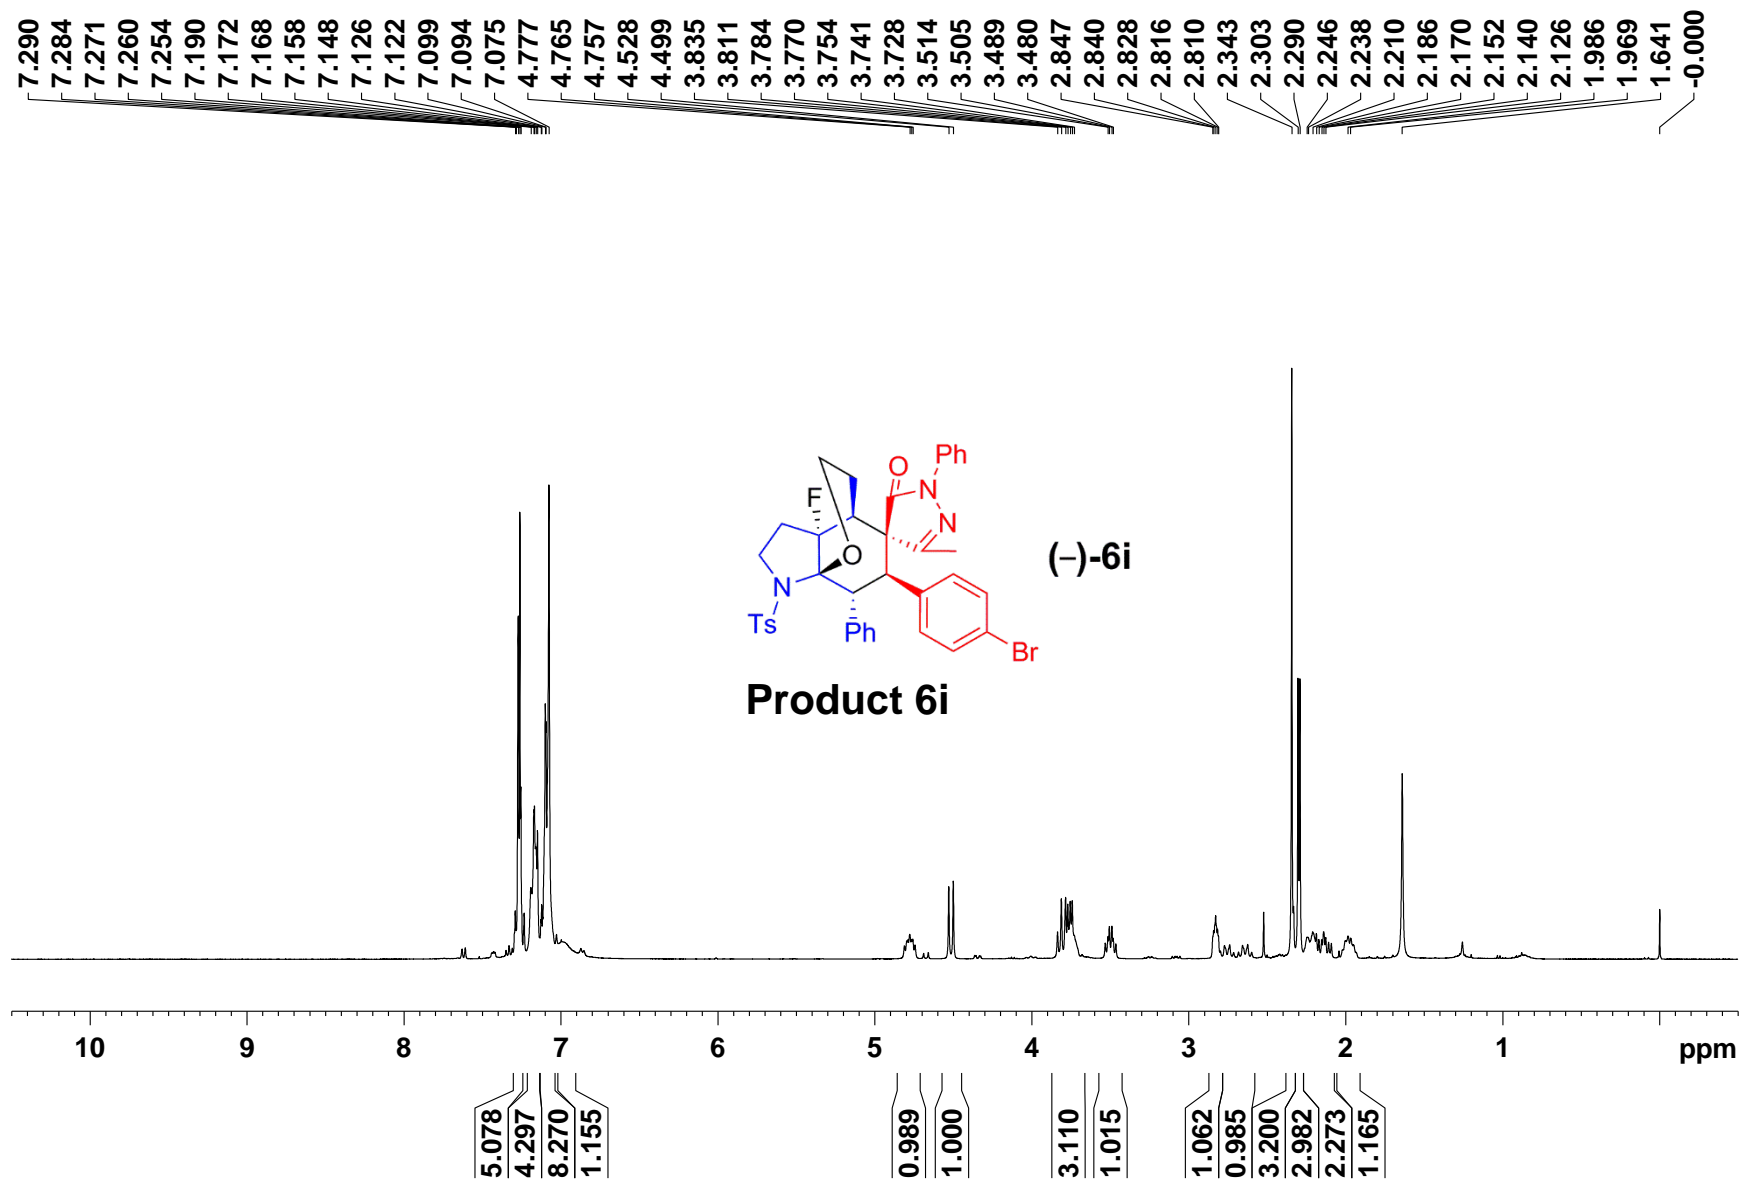

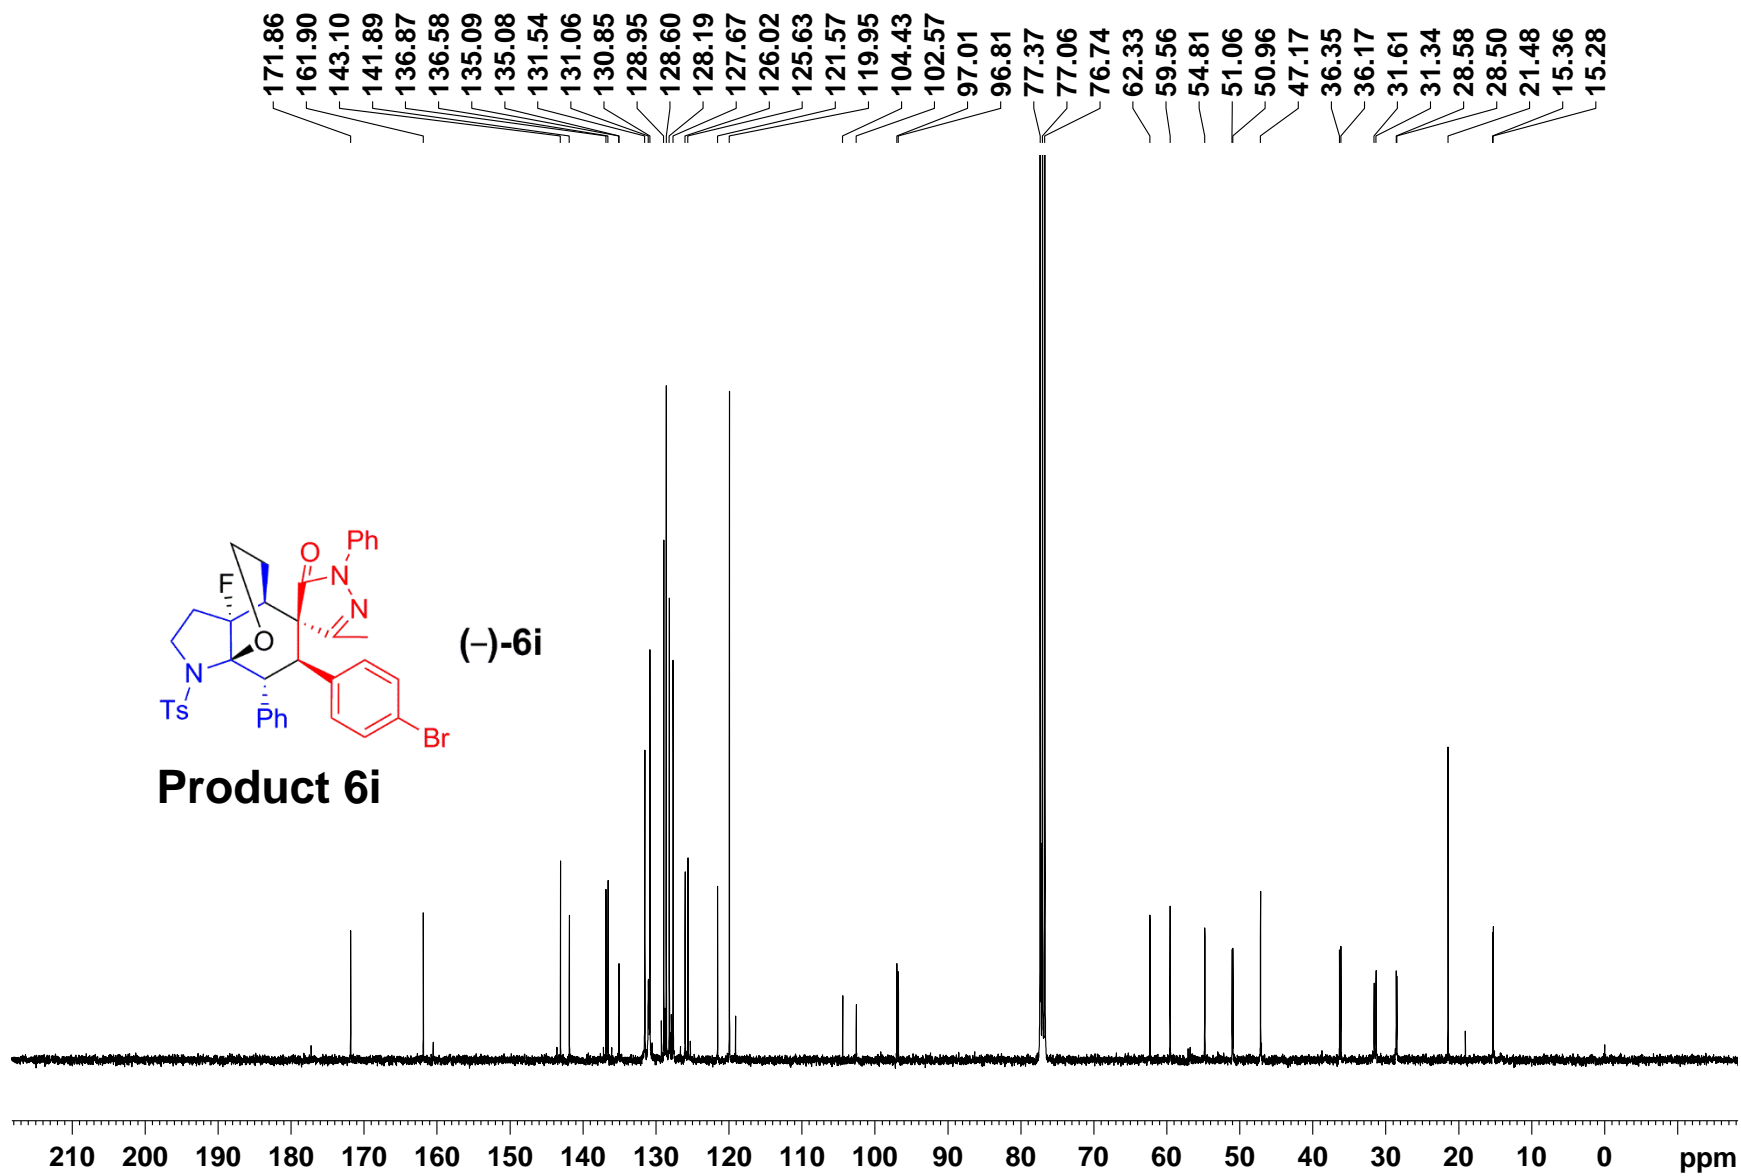

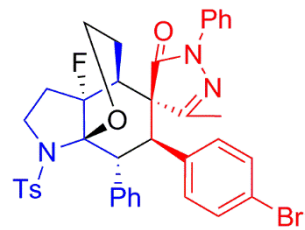

(-)-6i

Product 6i

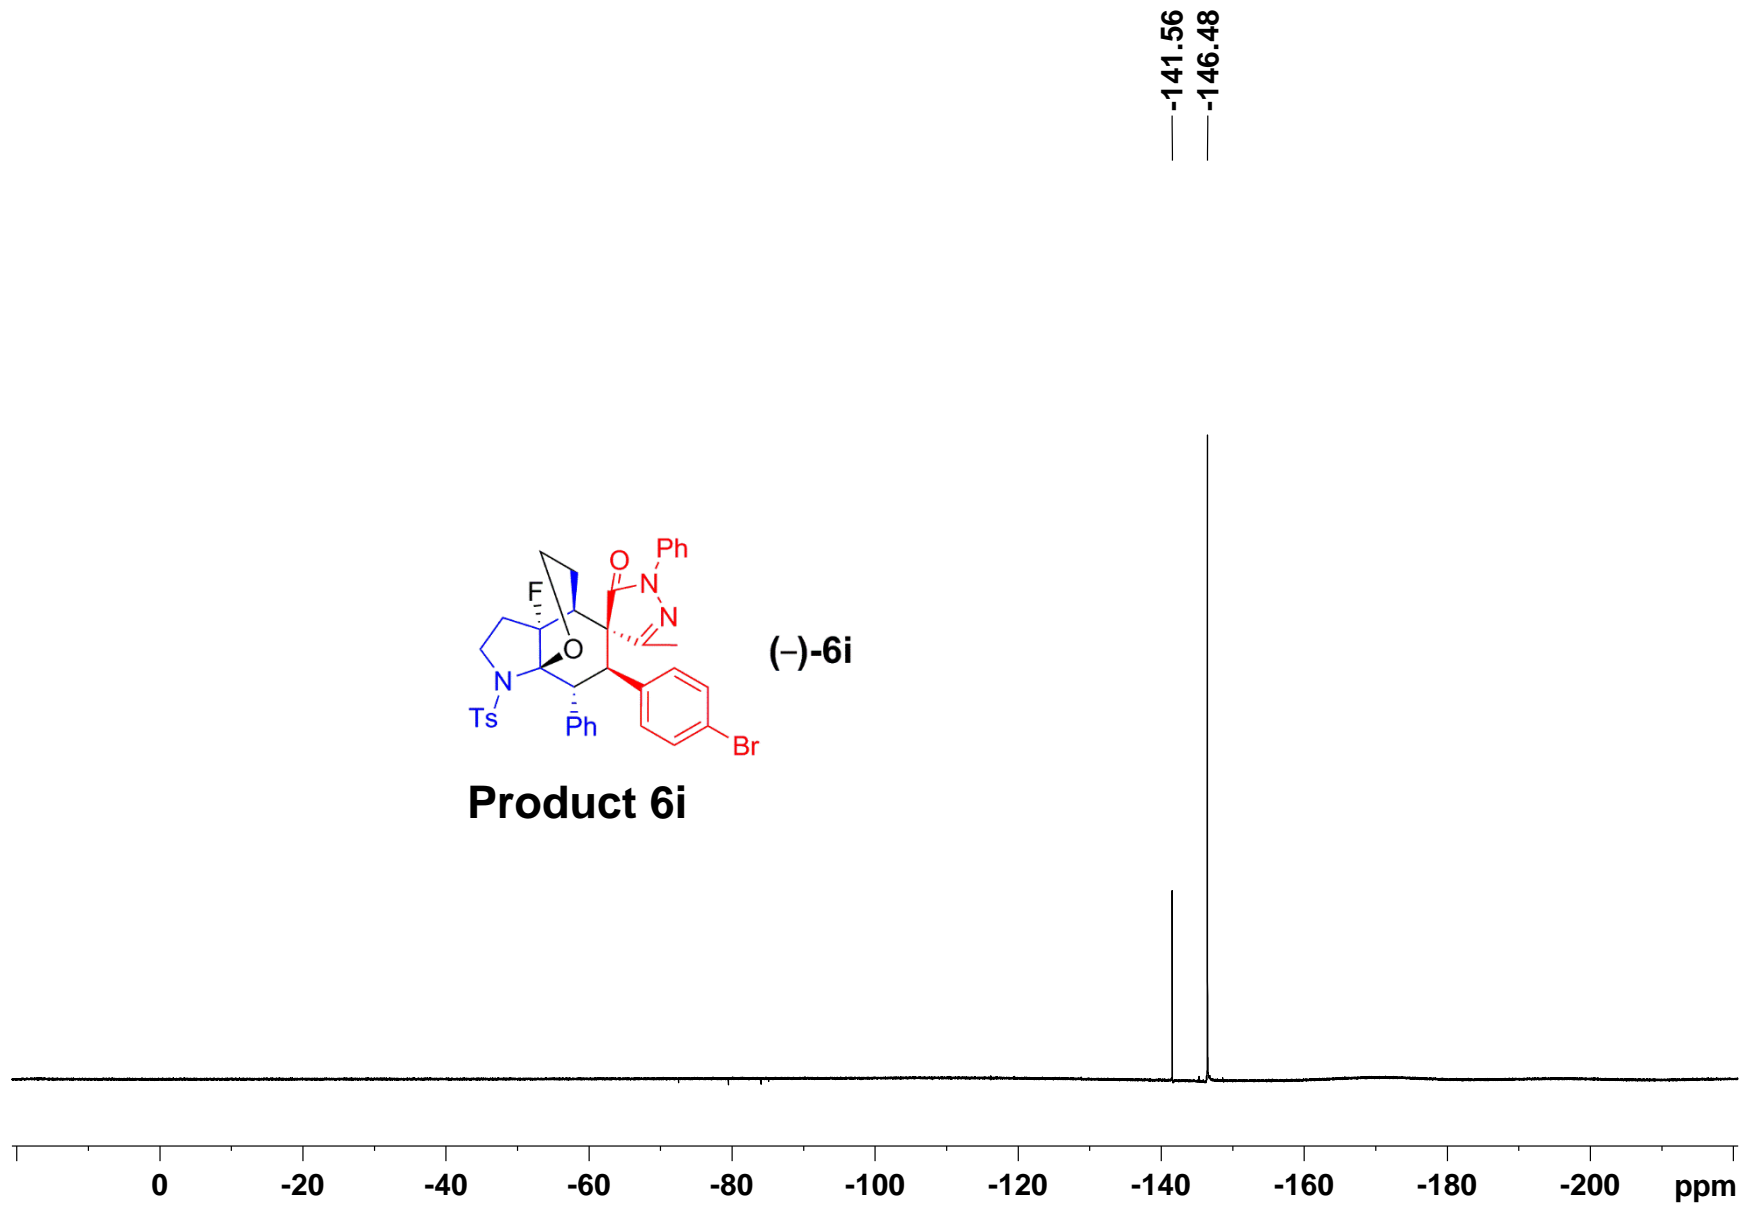

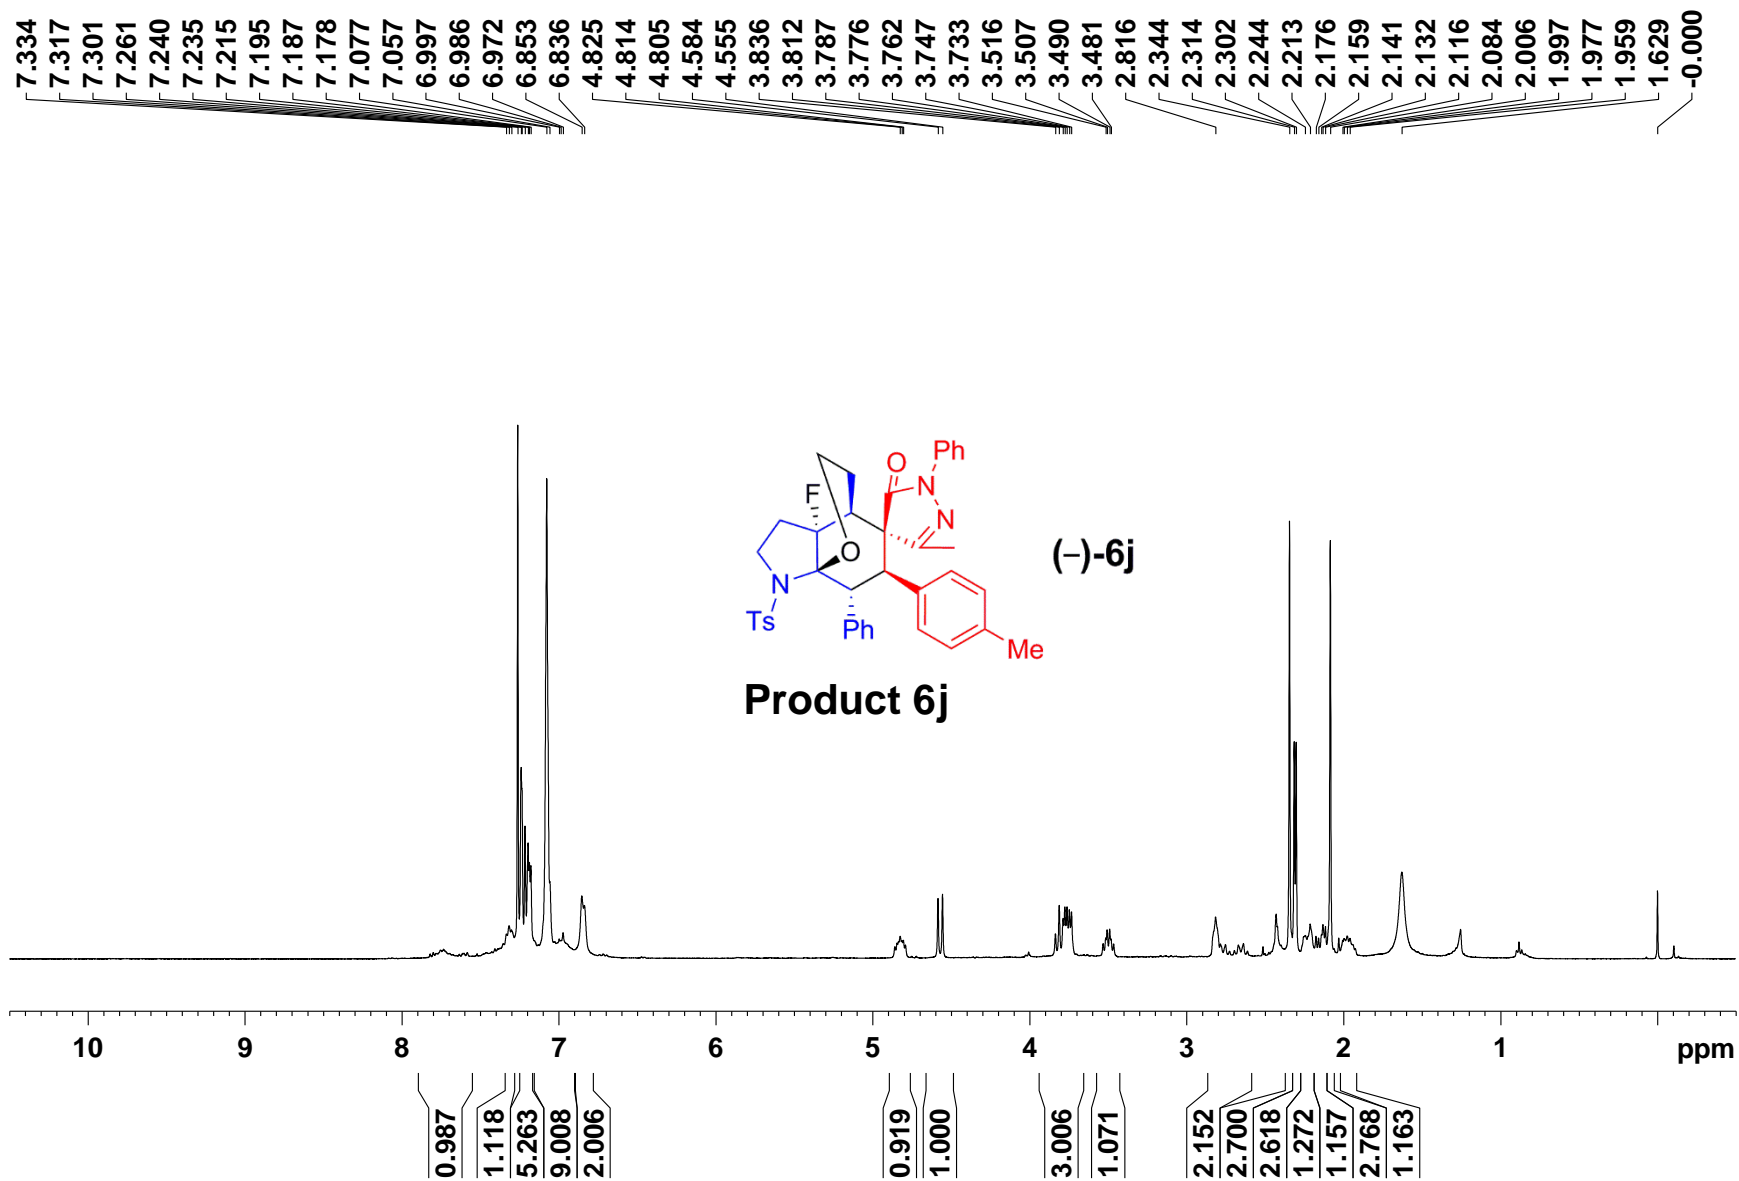

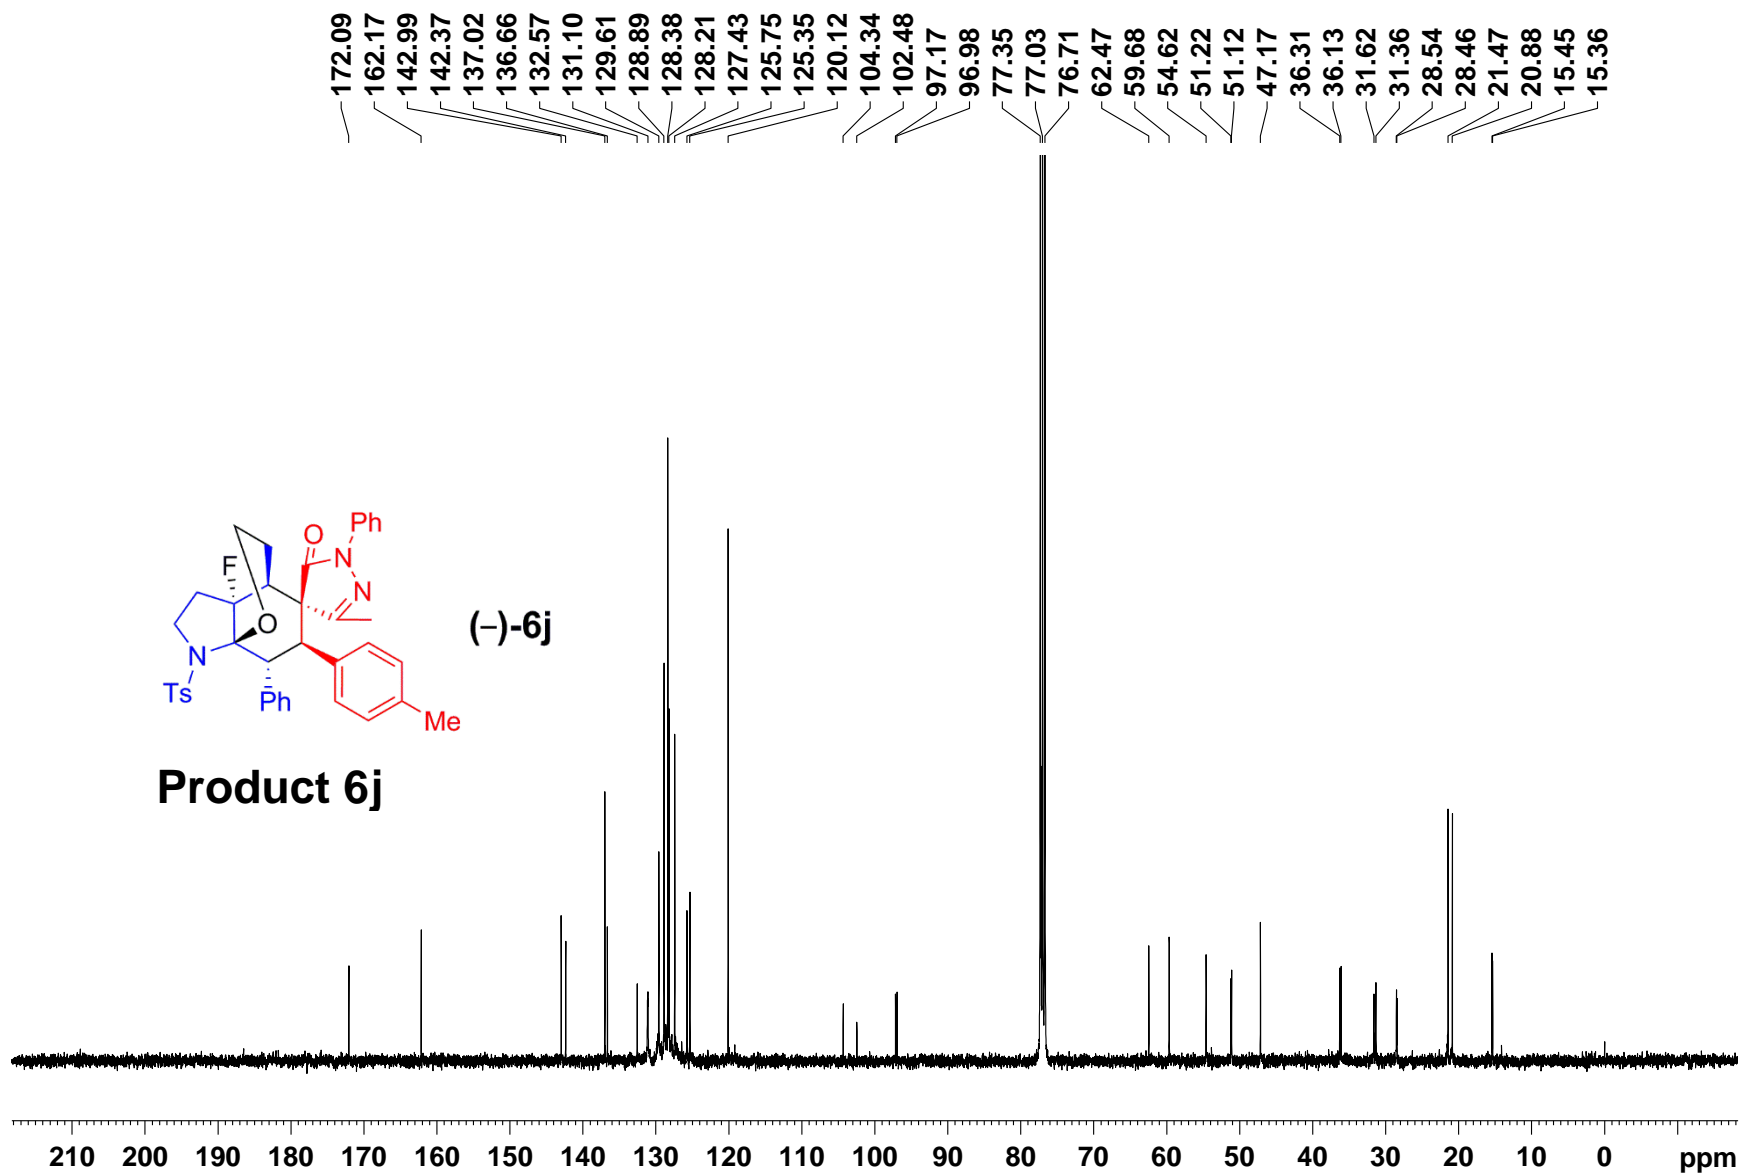



-146.74

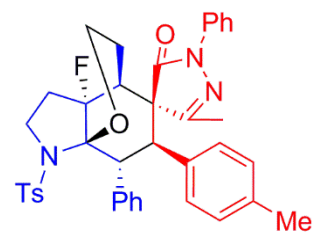

(-)-6j

Product 6j

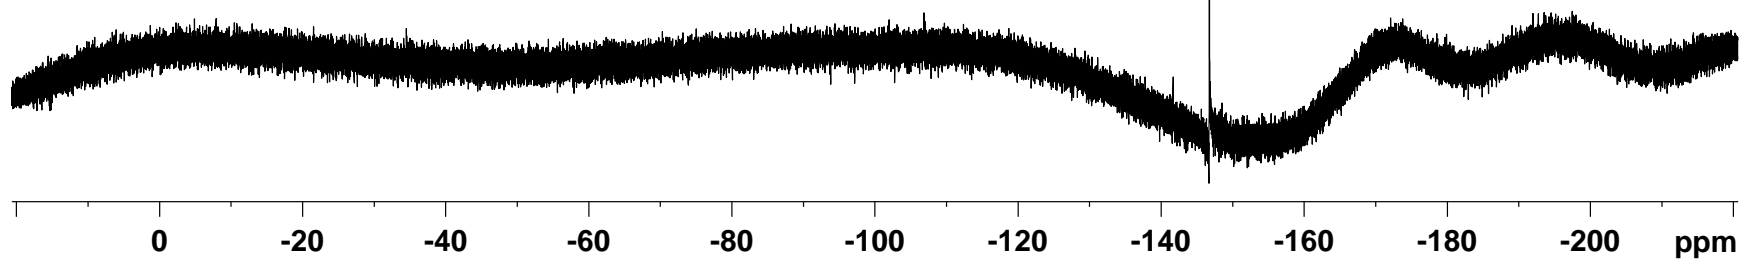

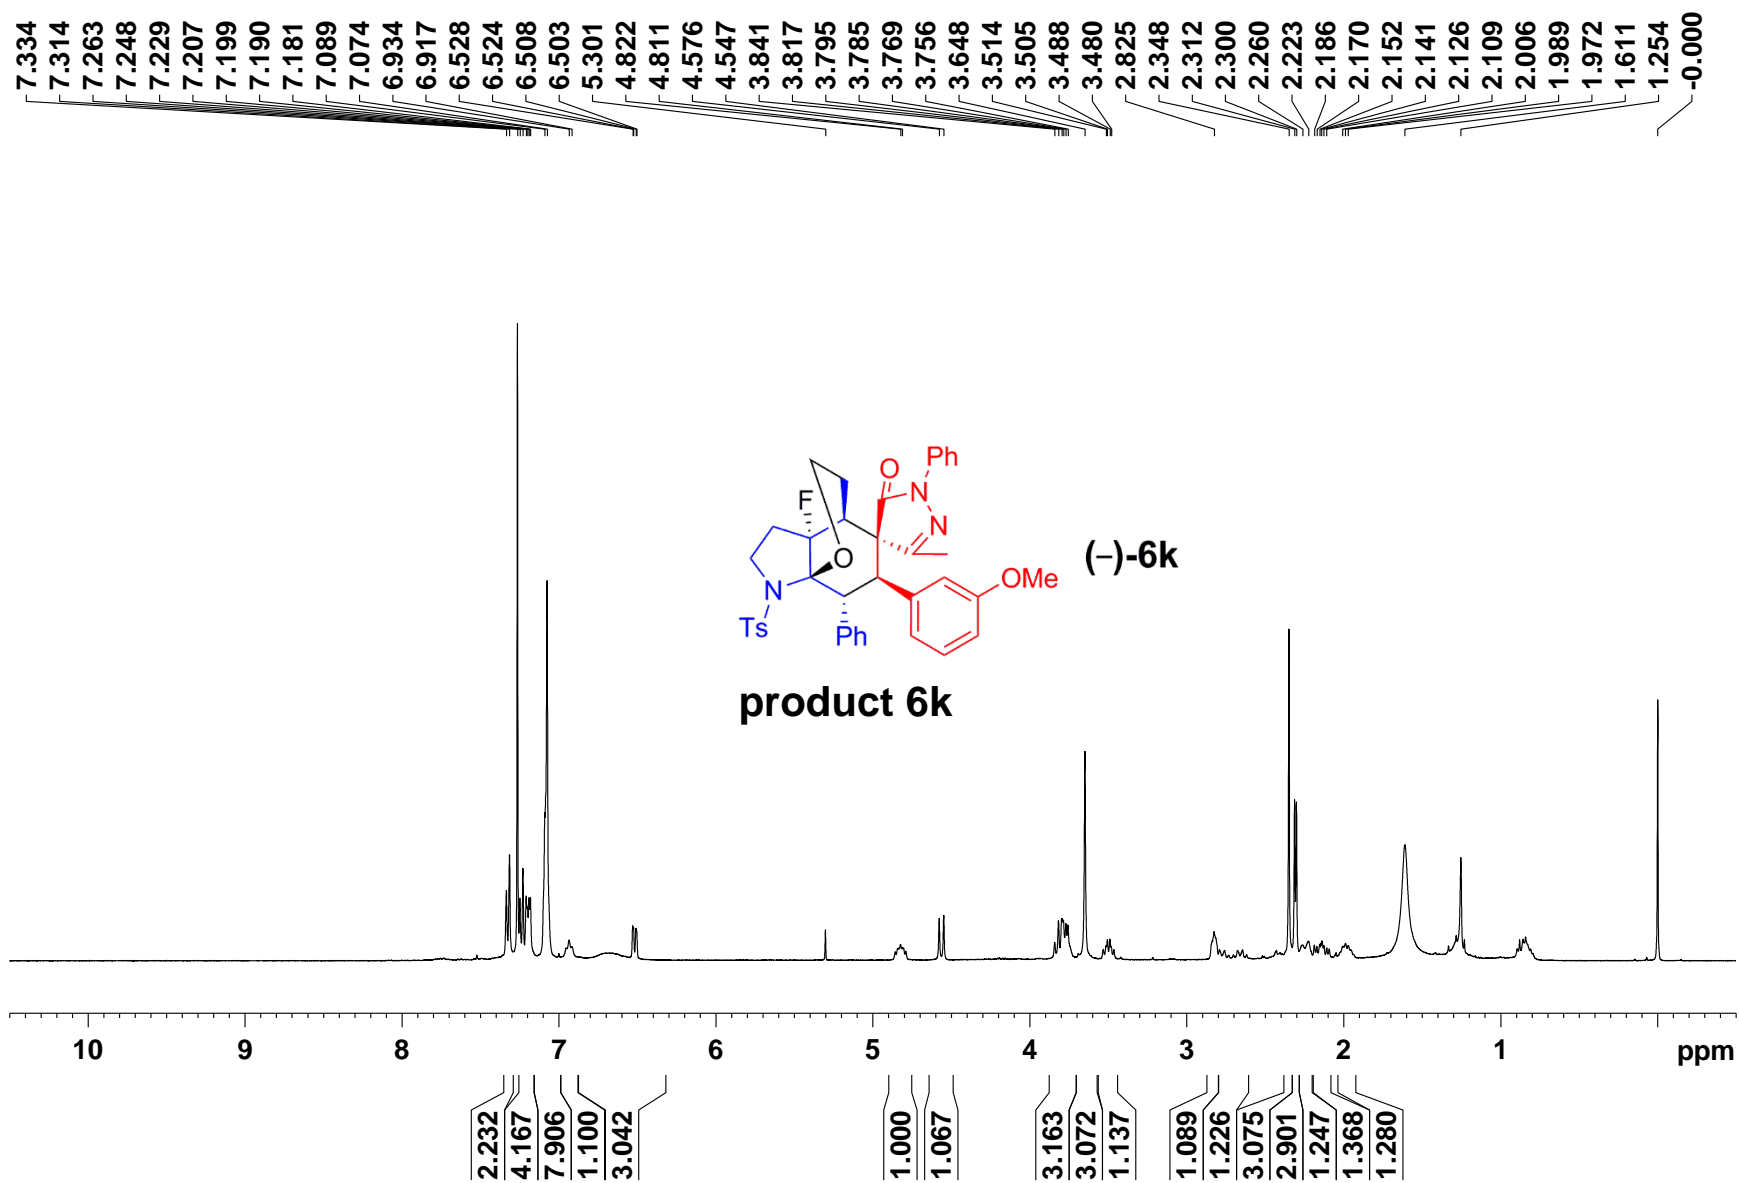

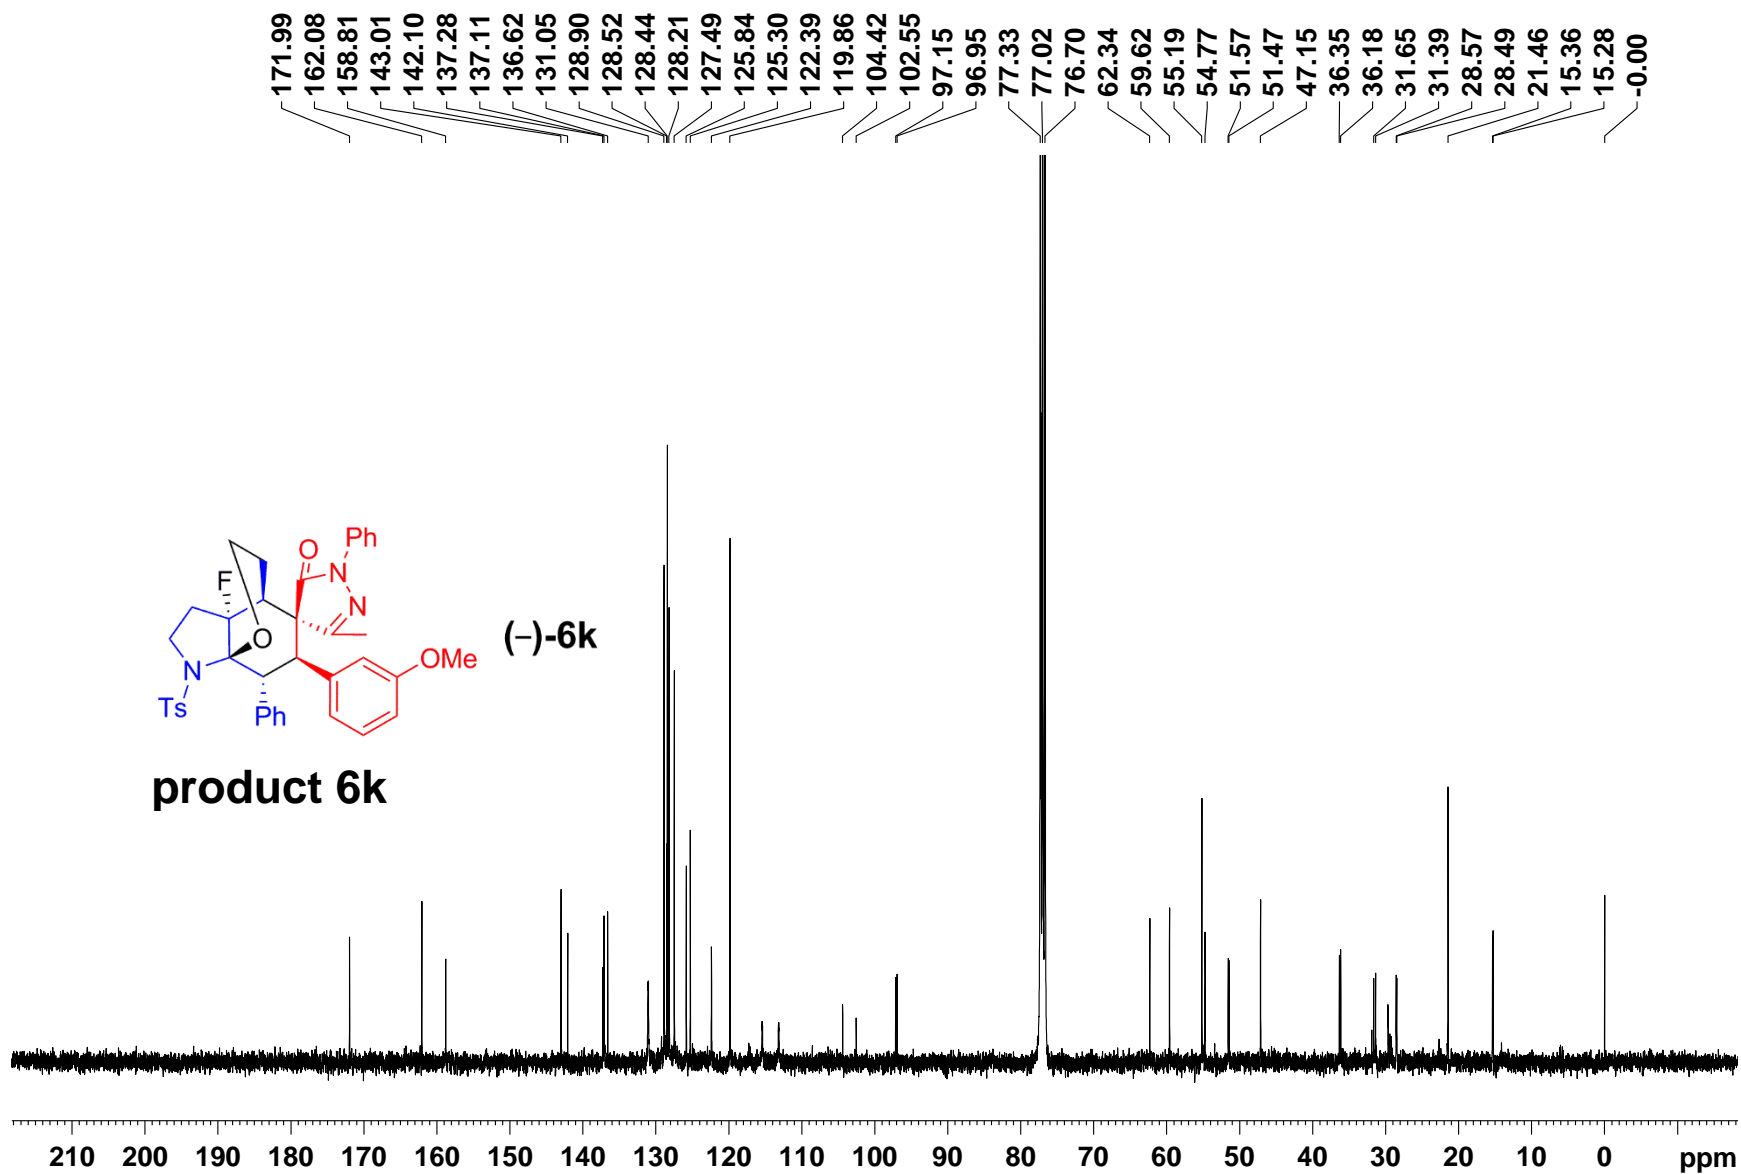

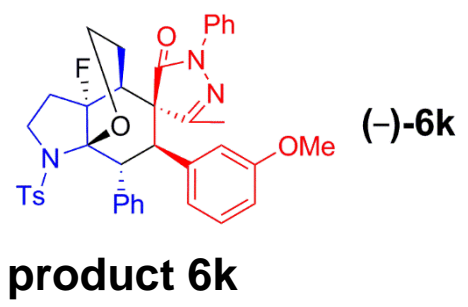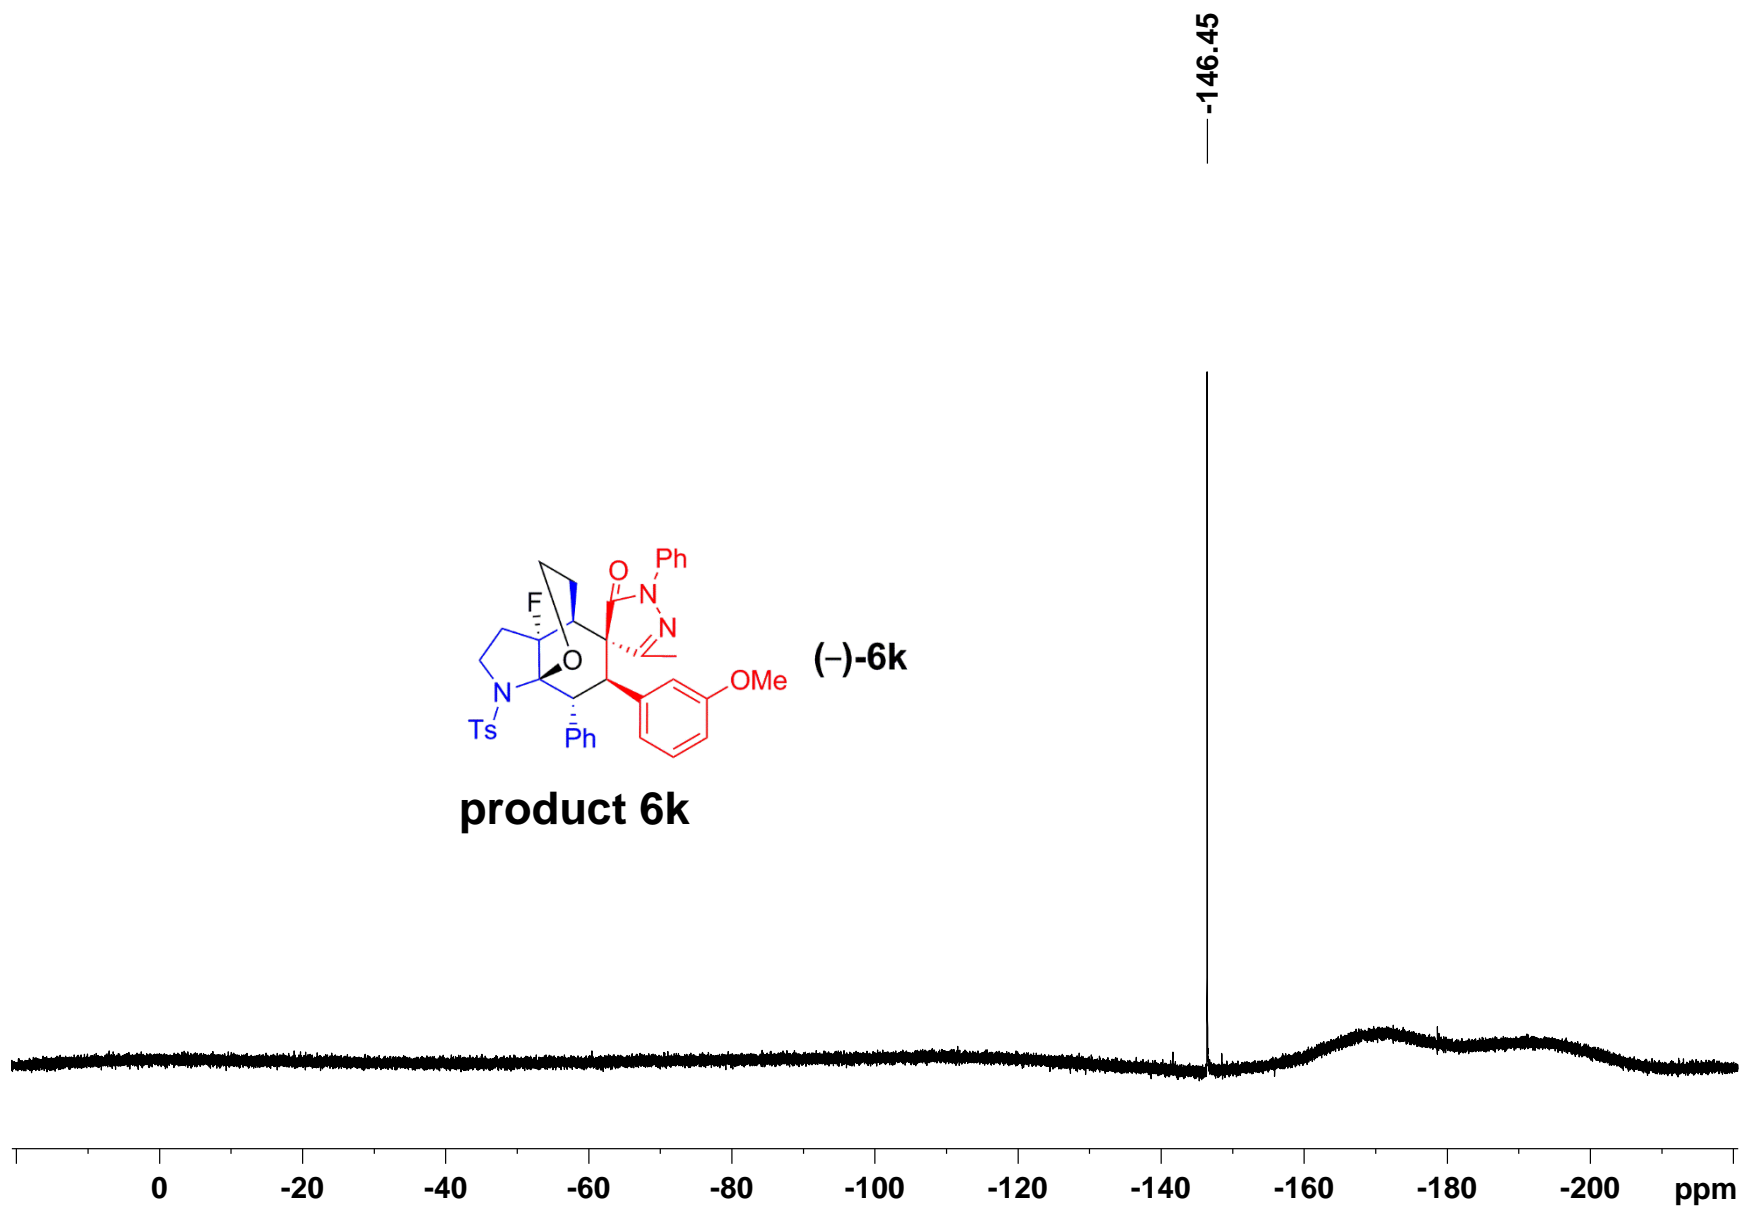

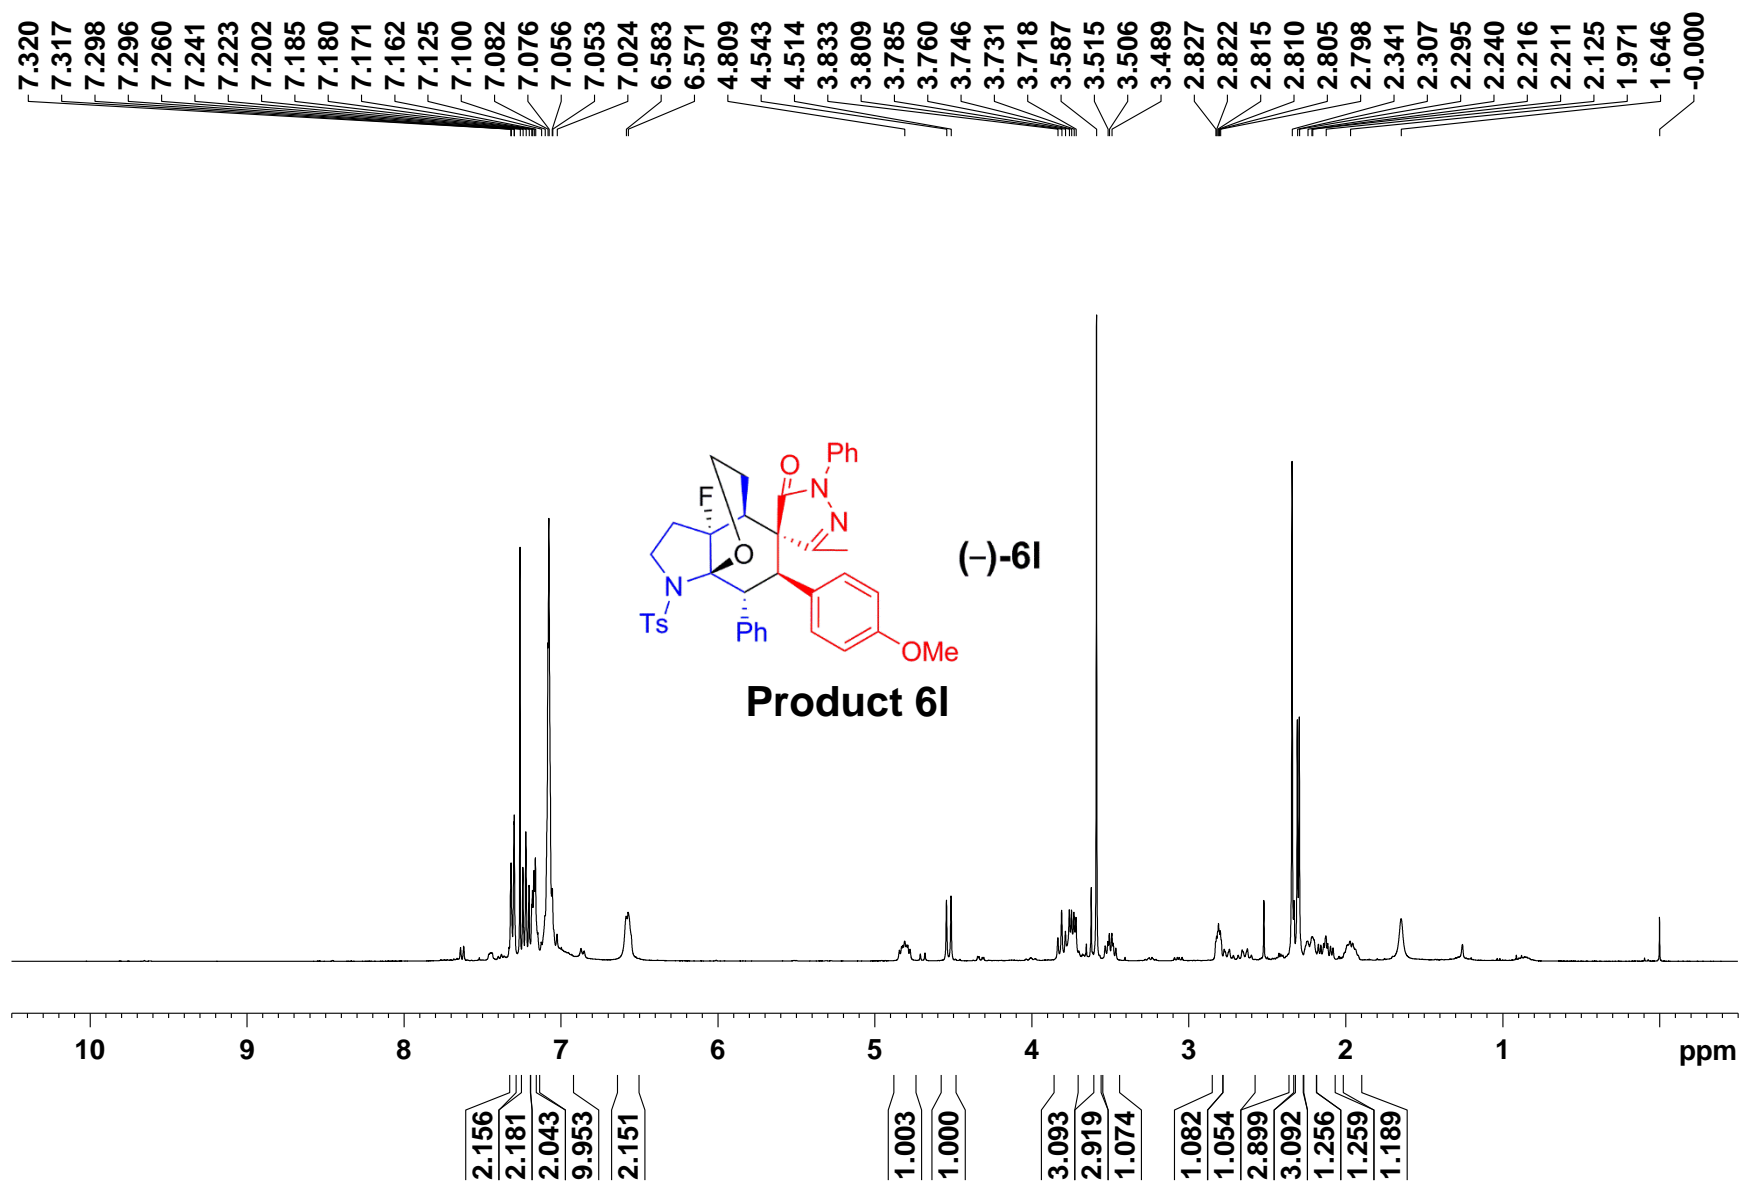

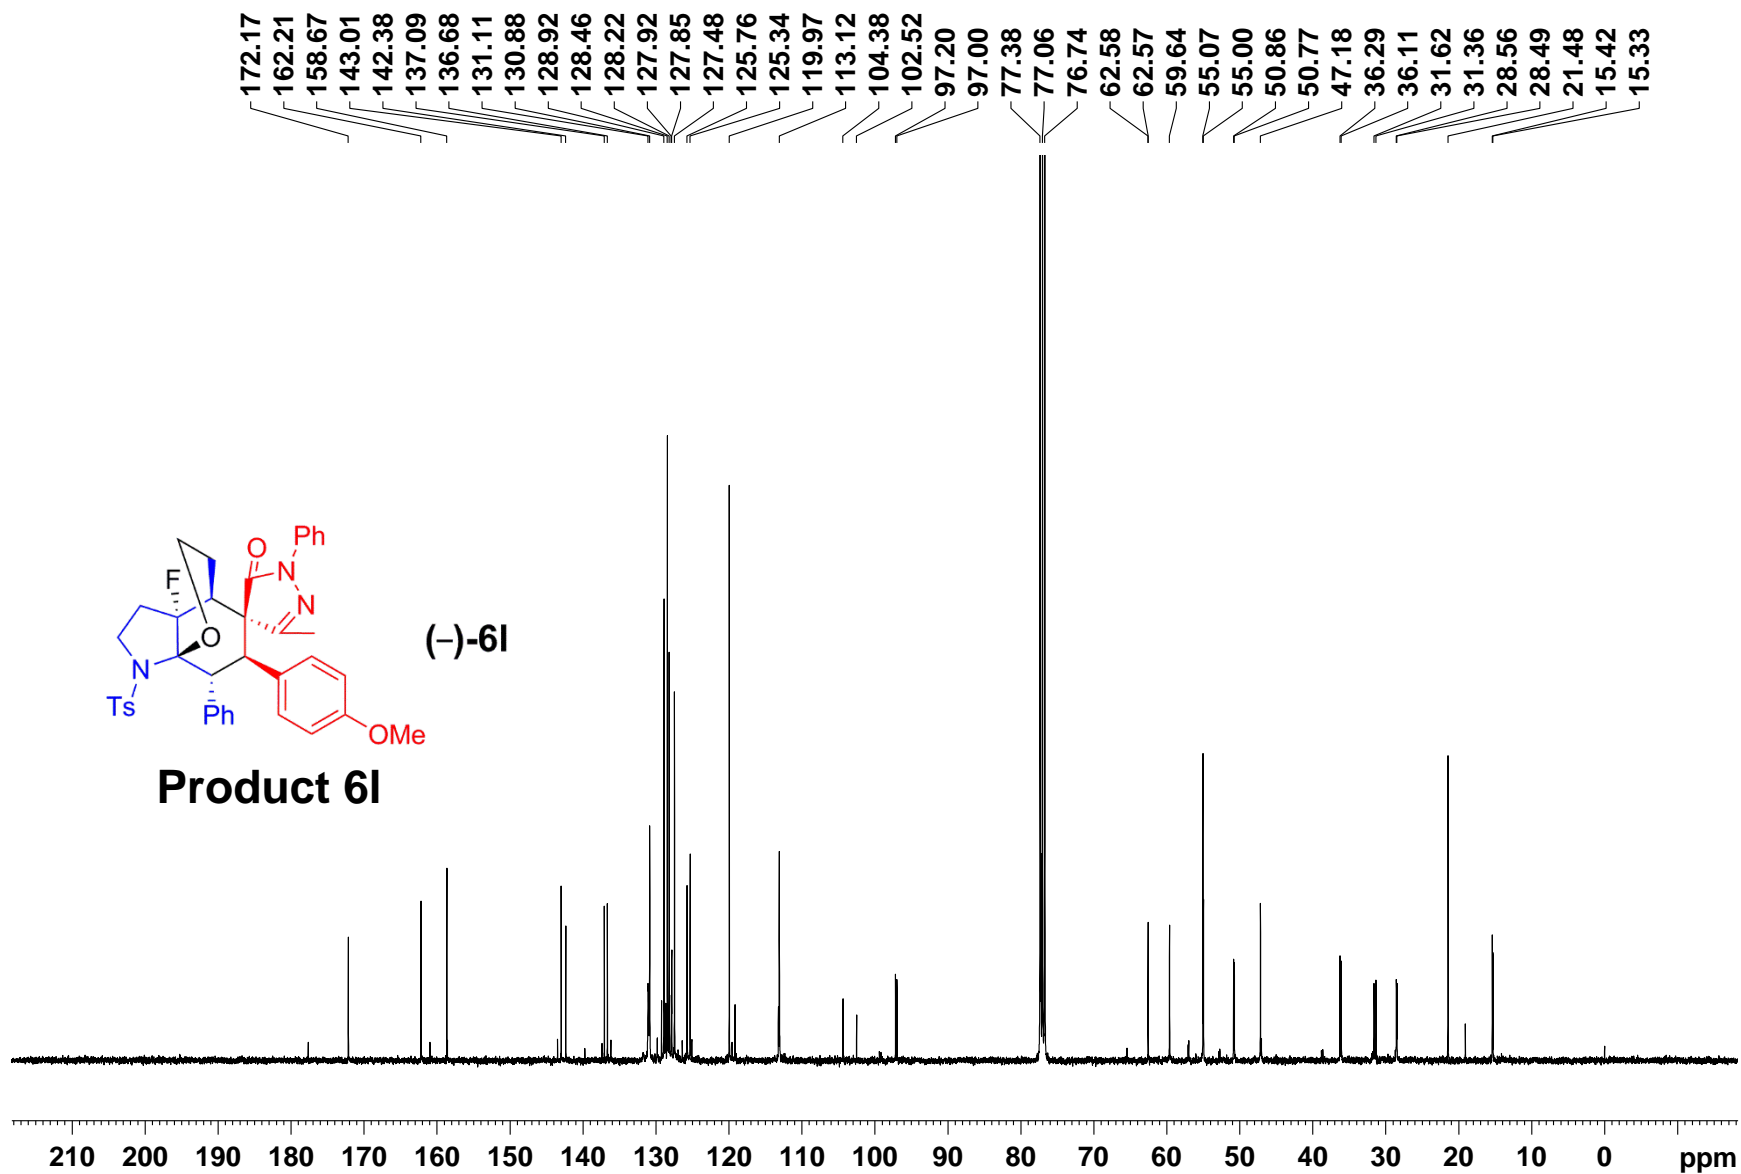

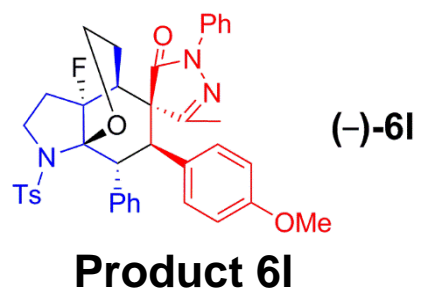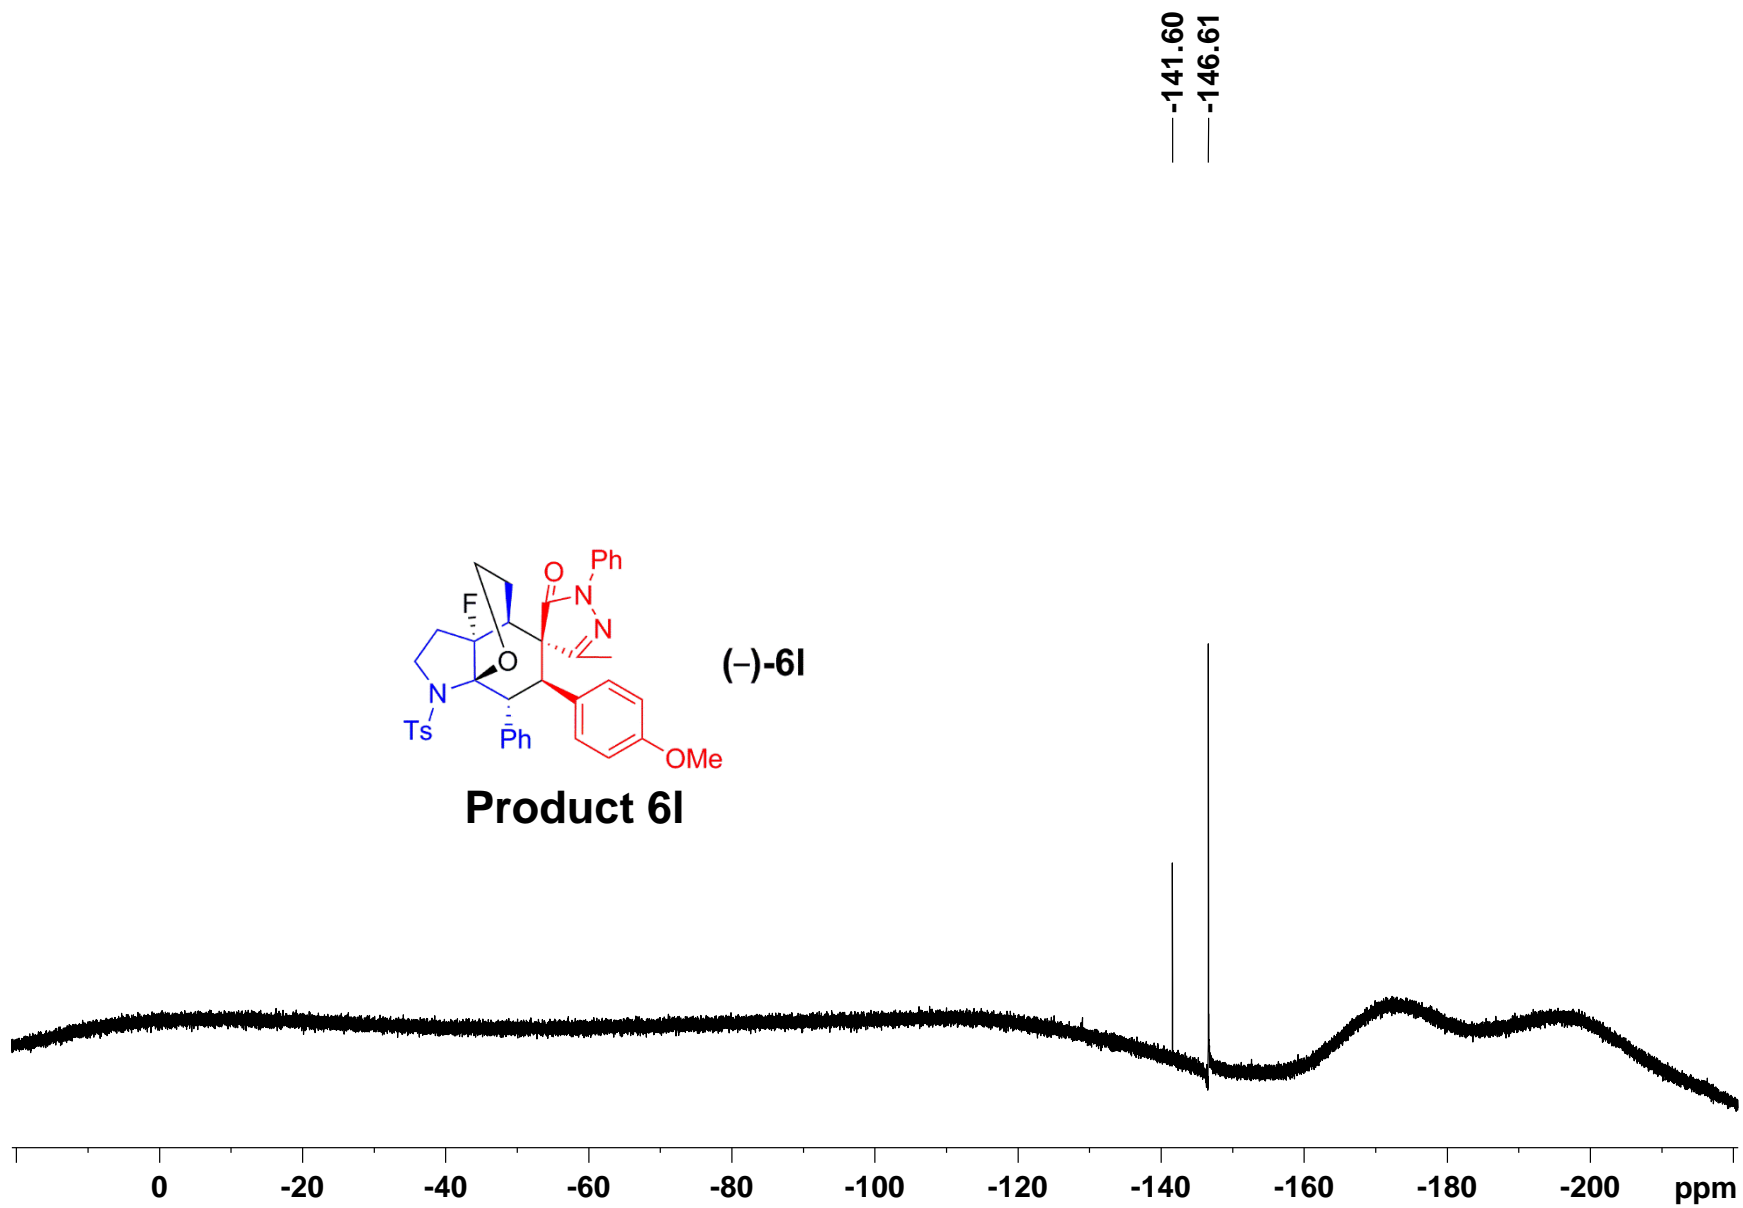

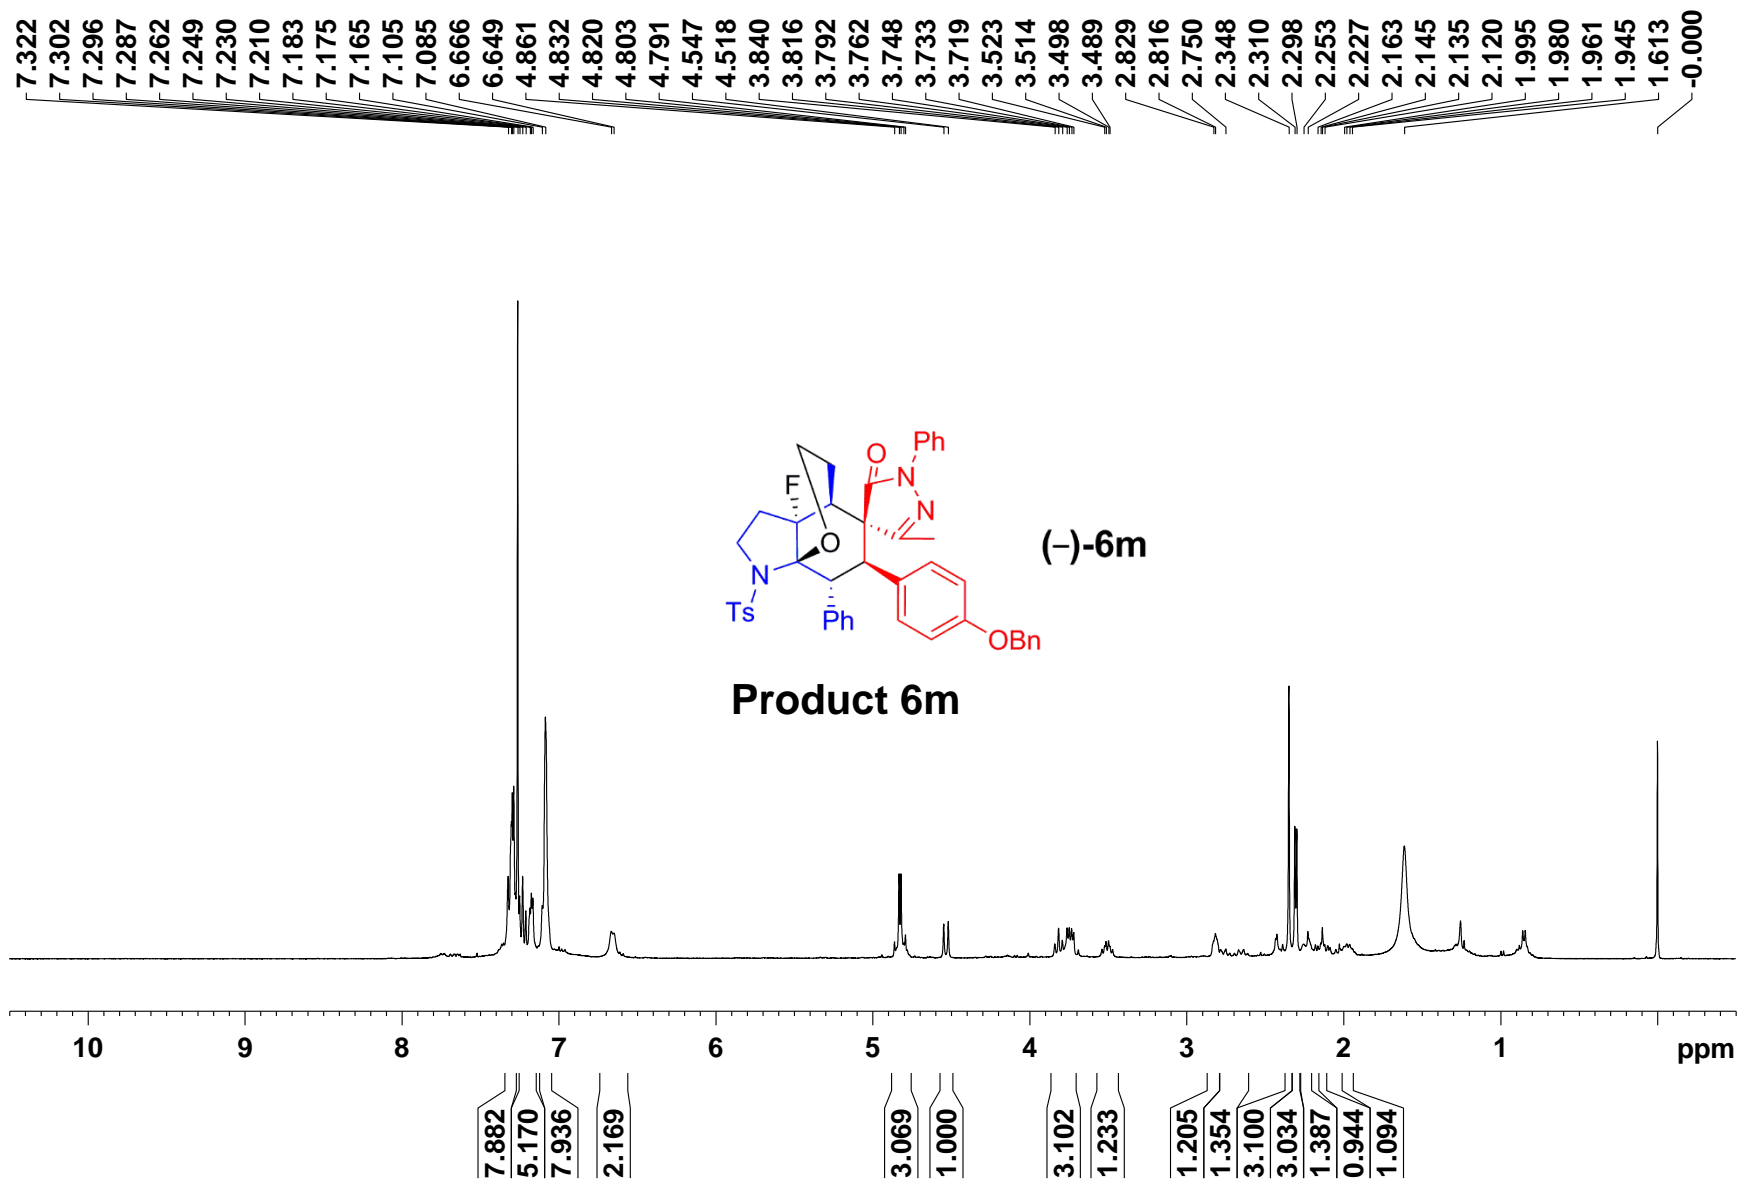



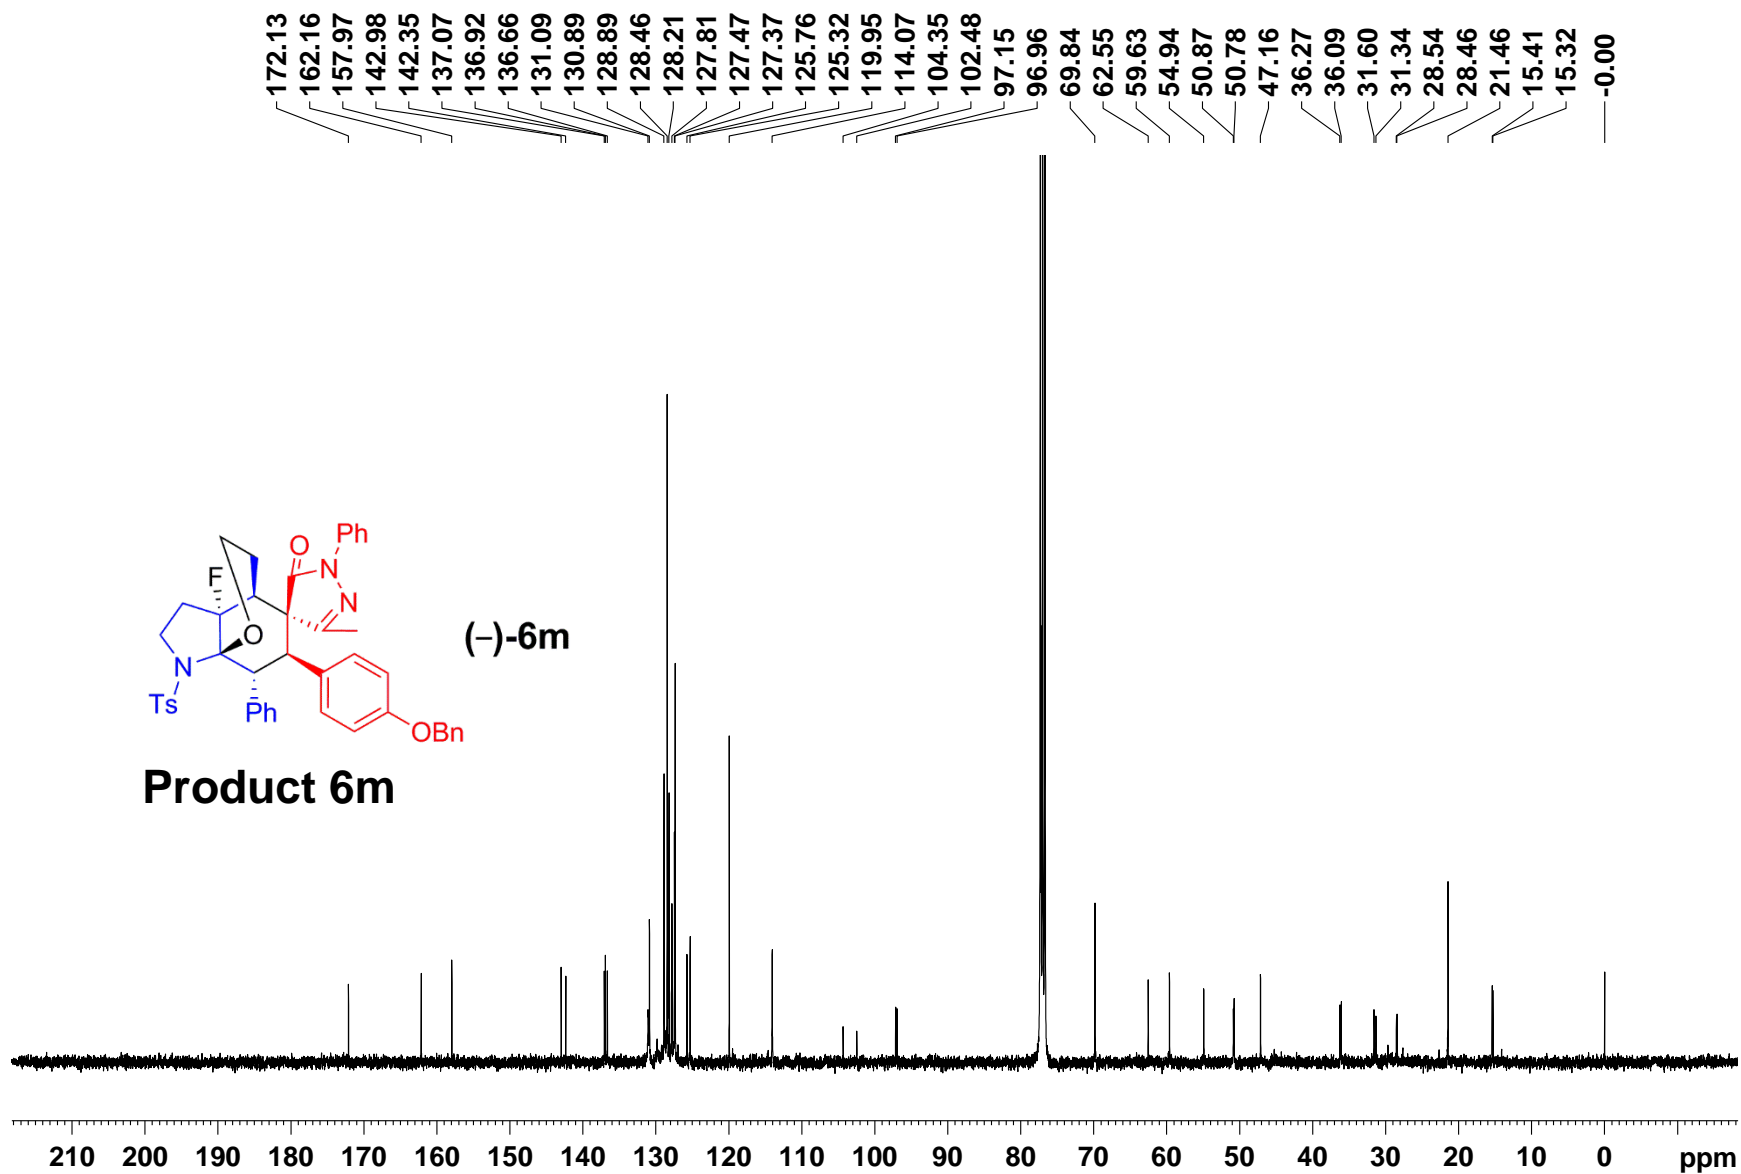

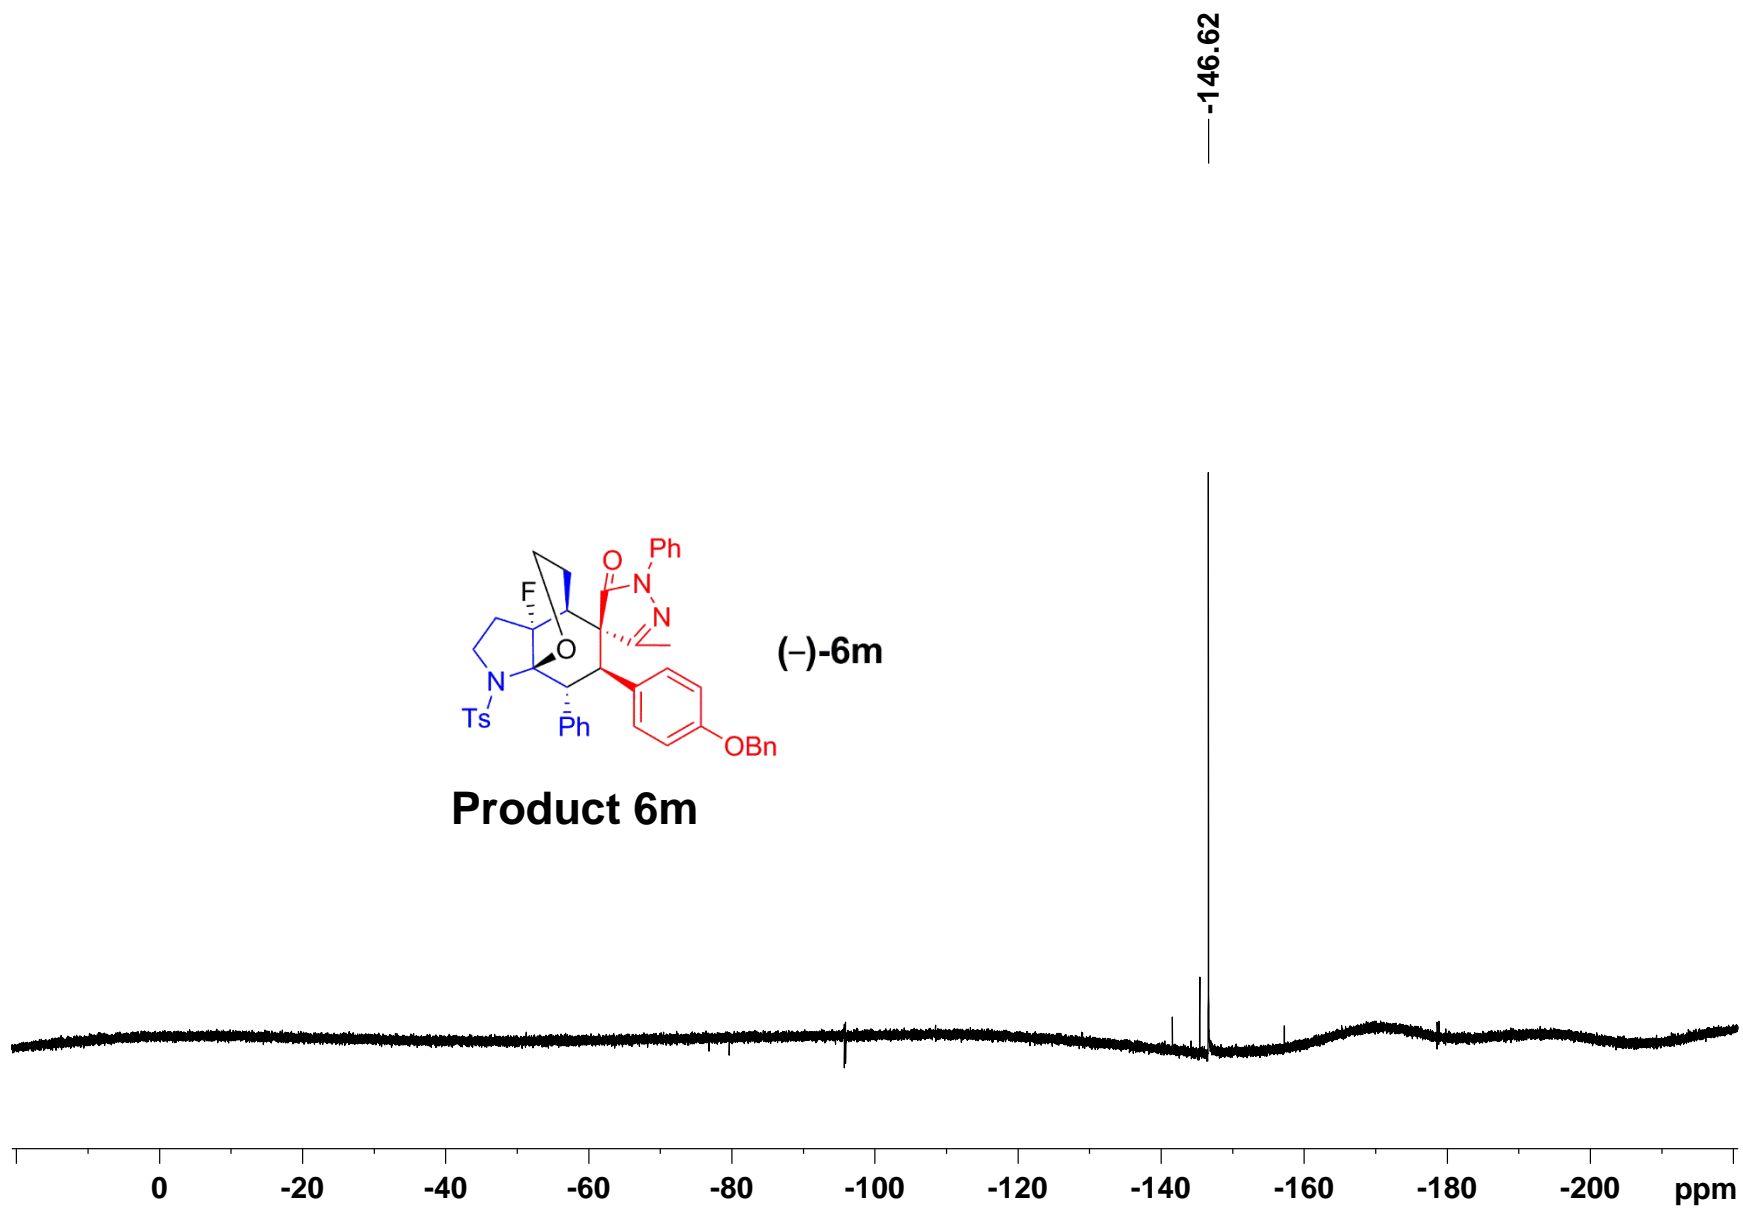

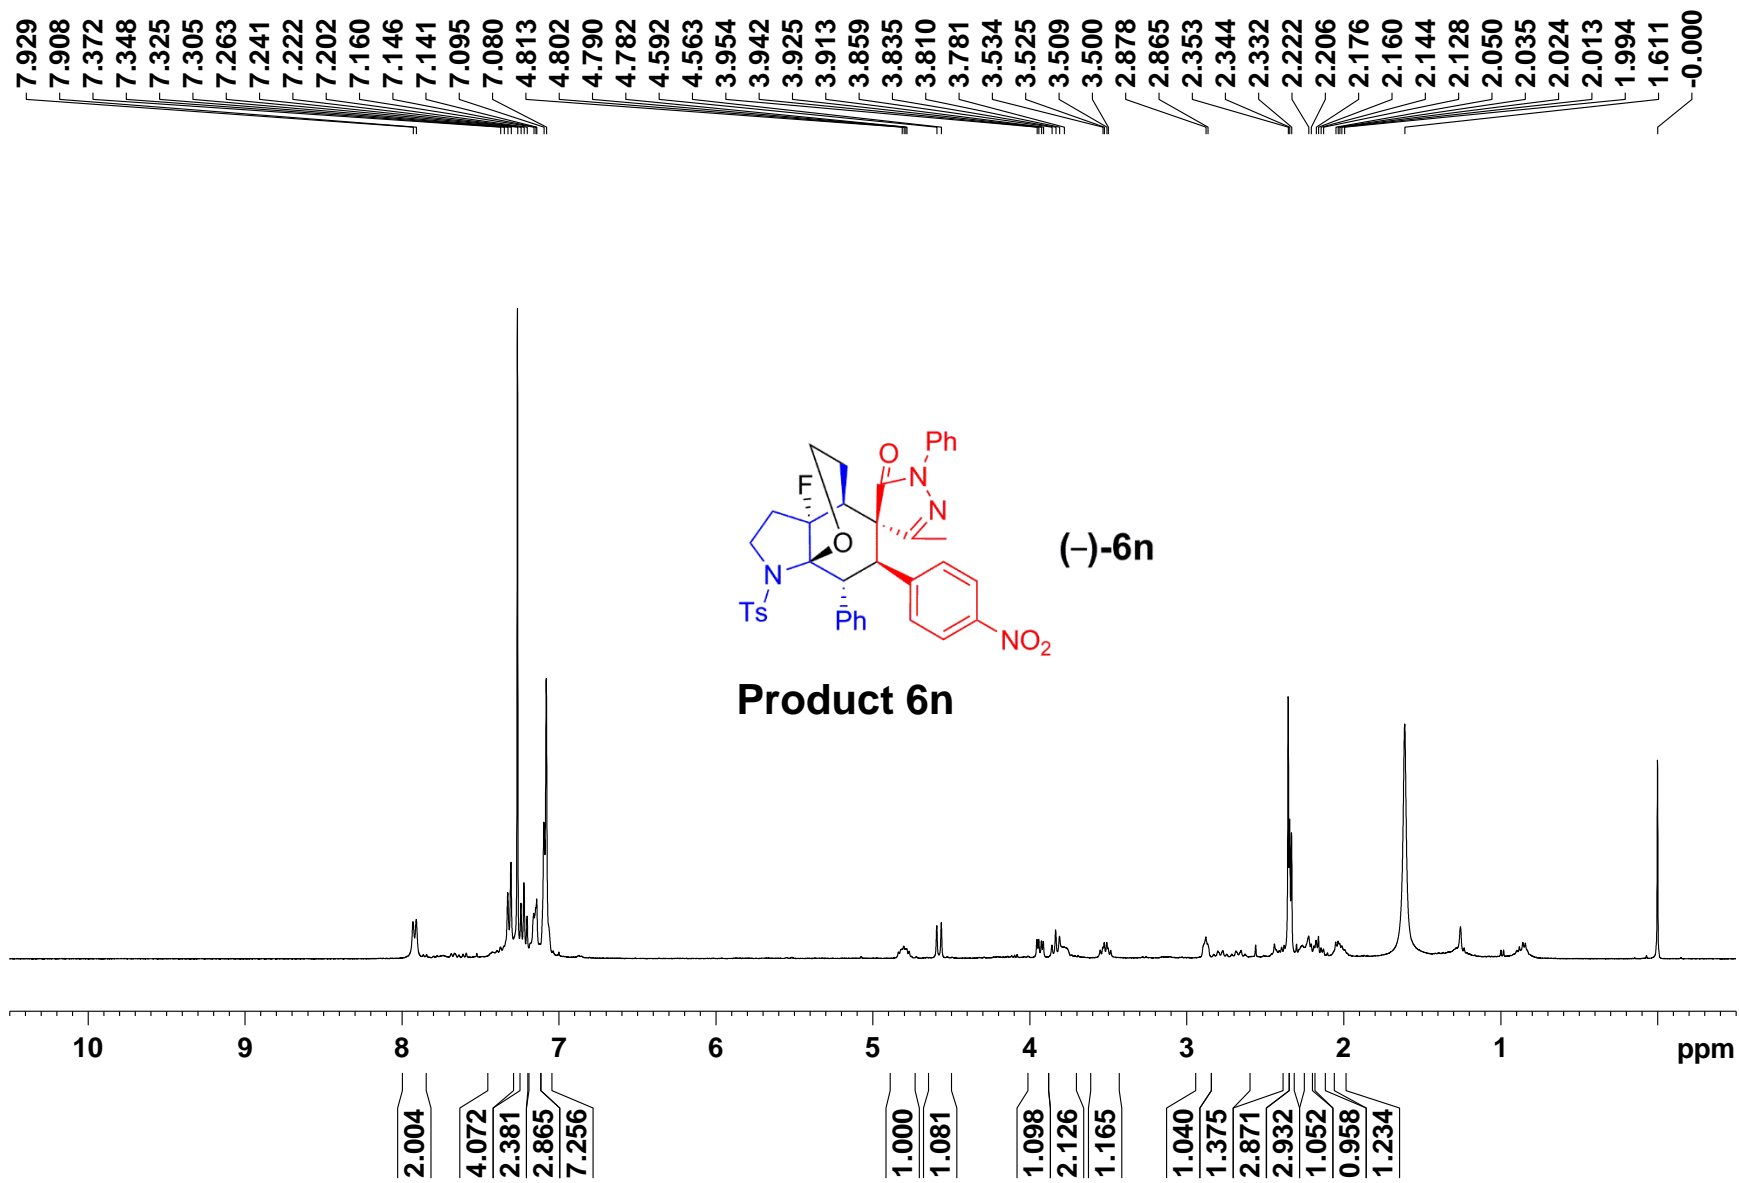

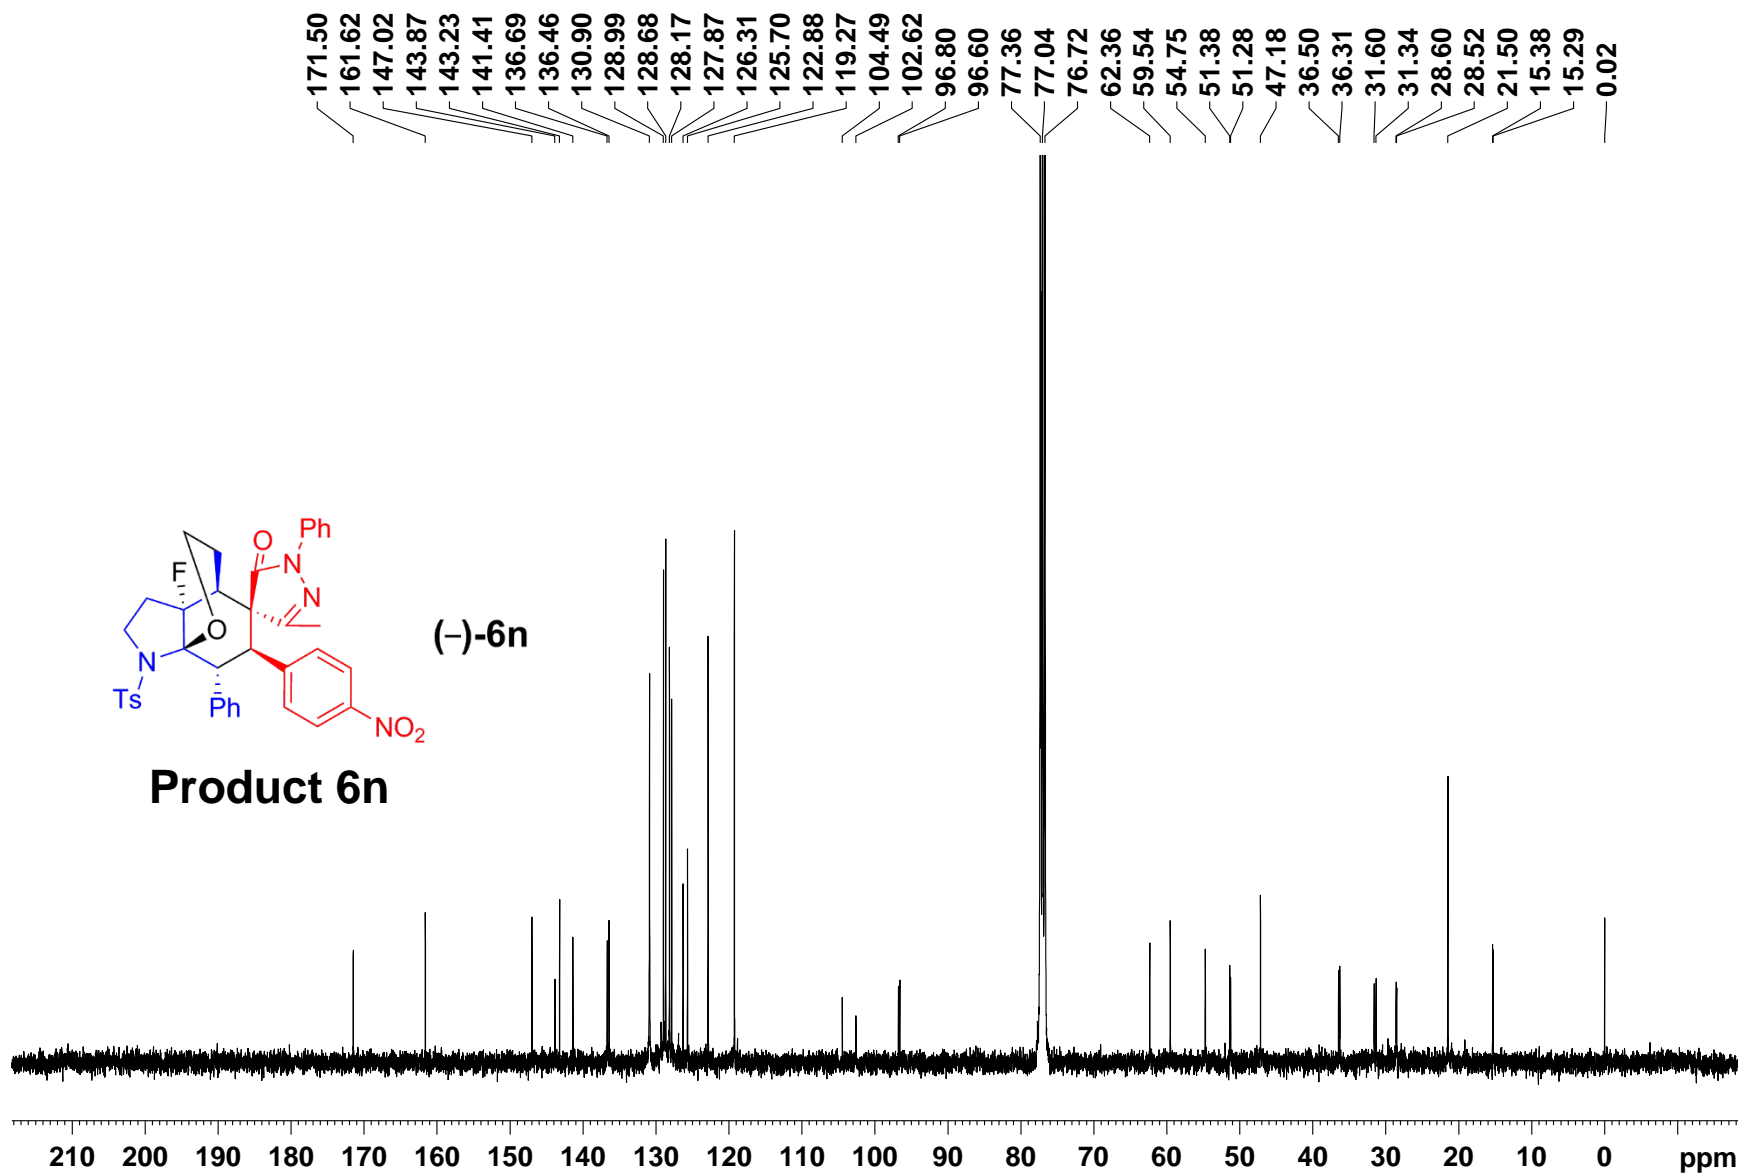

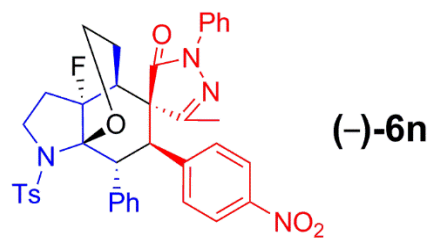

**Product 6n**

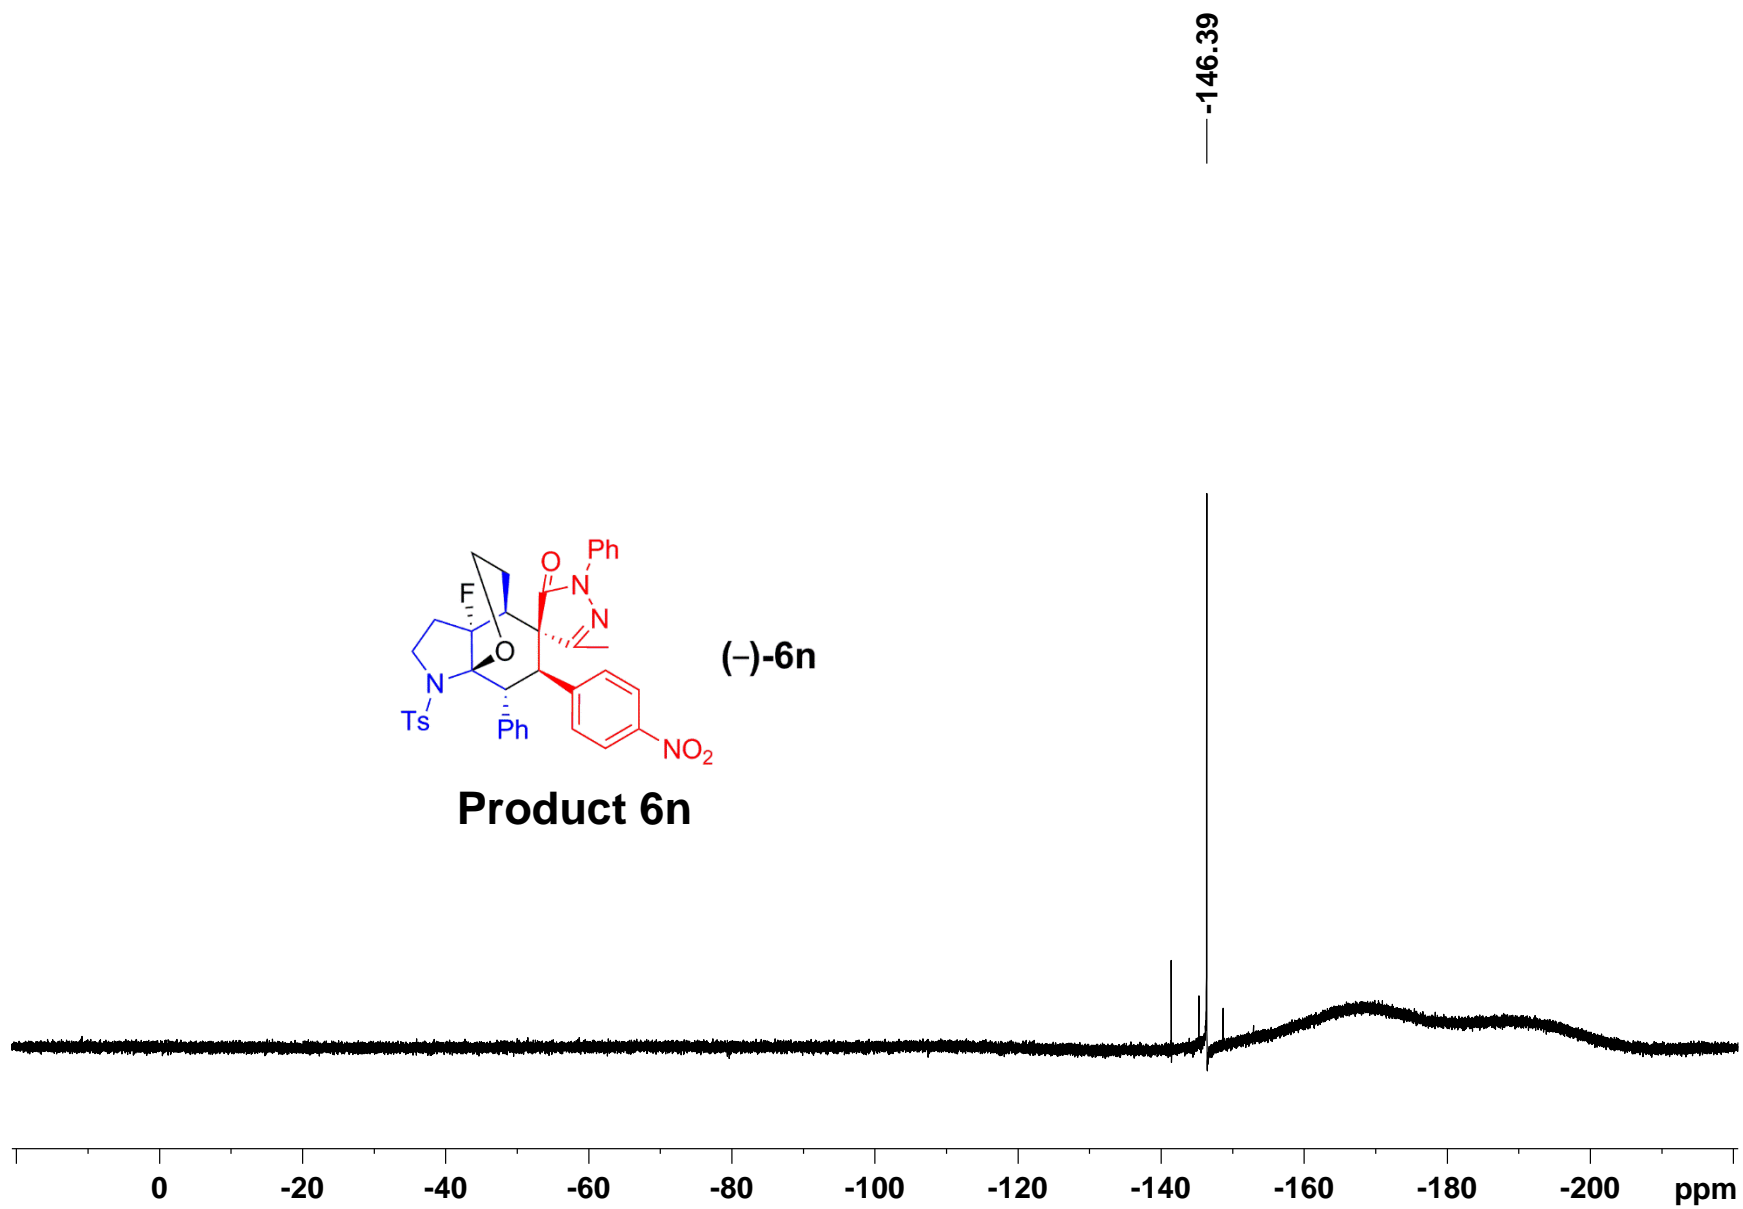

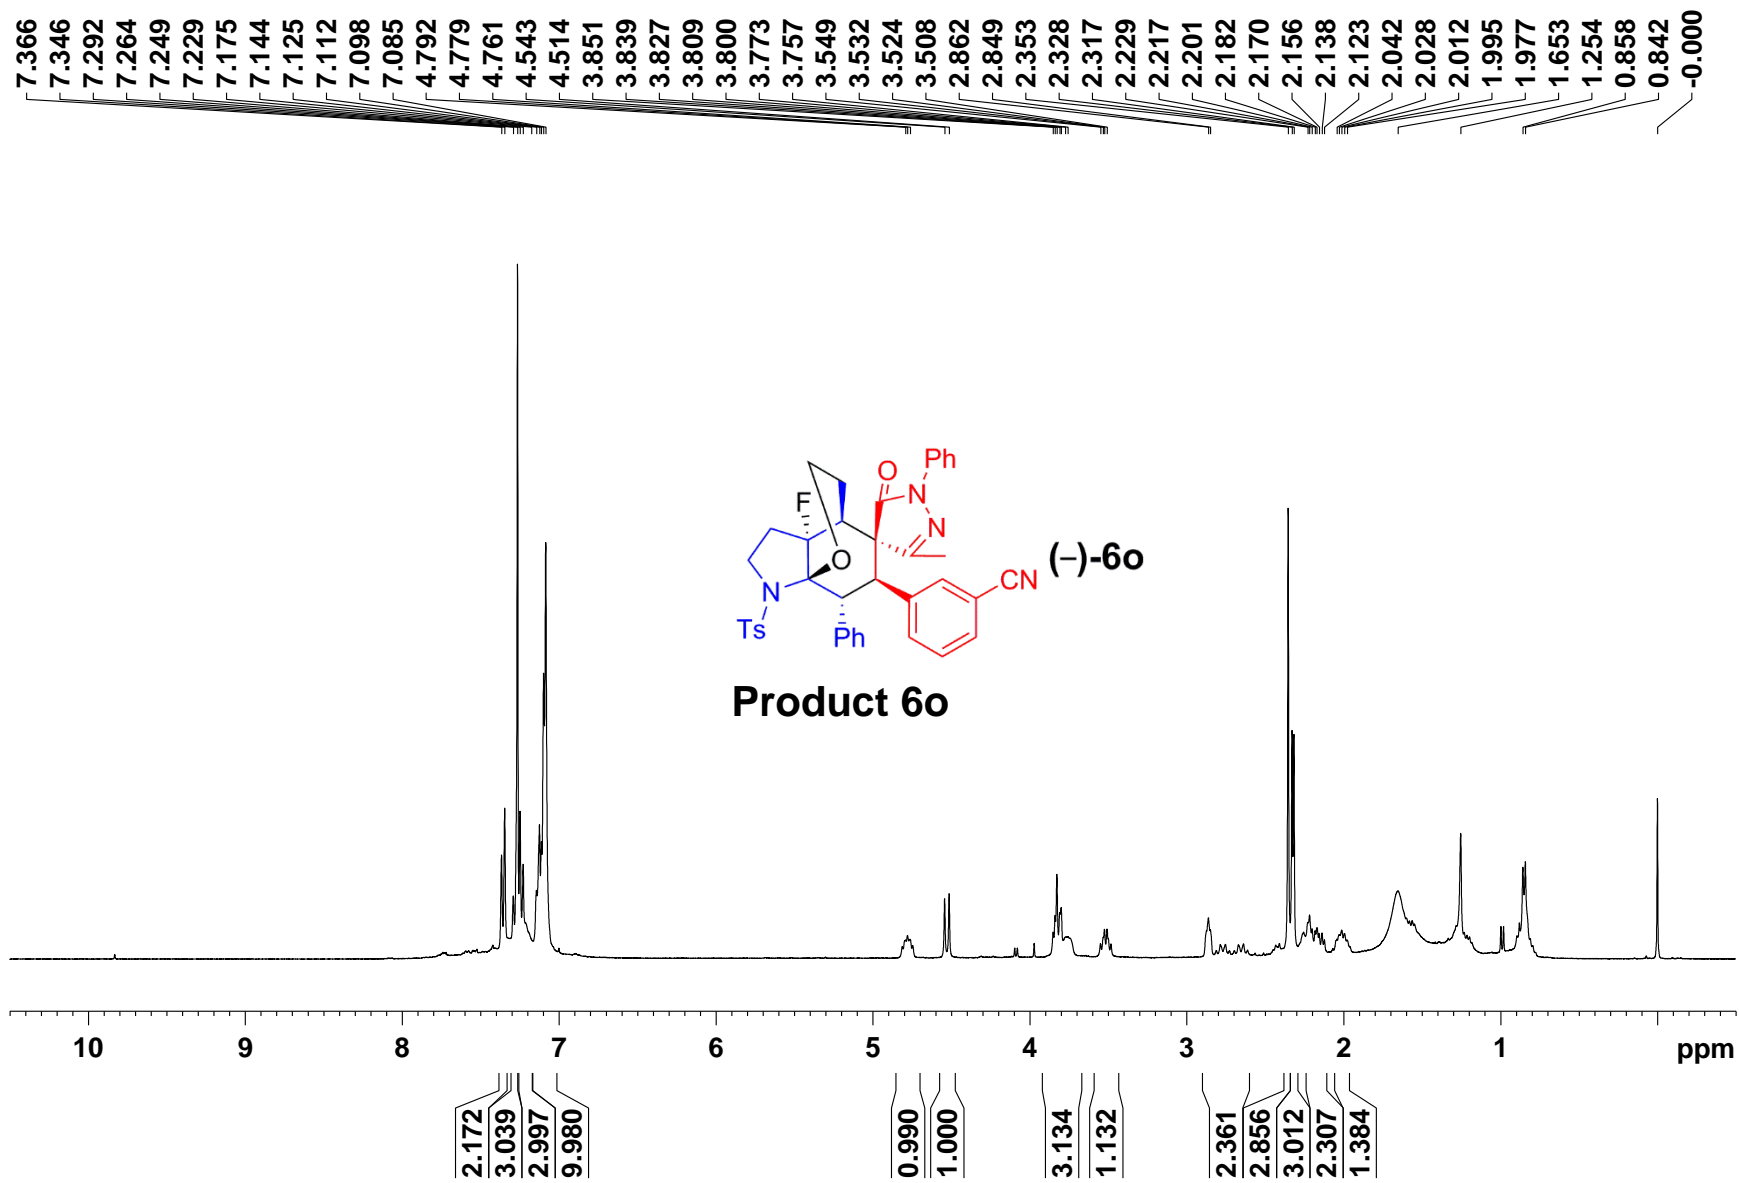

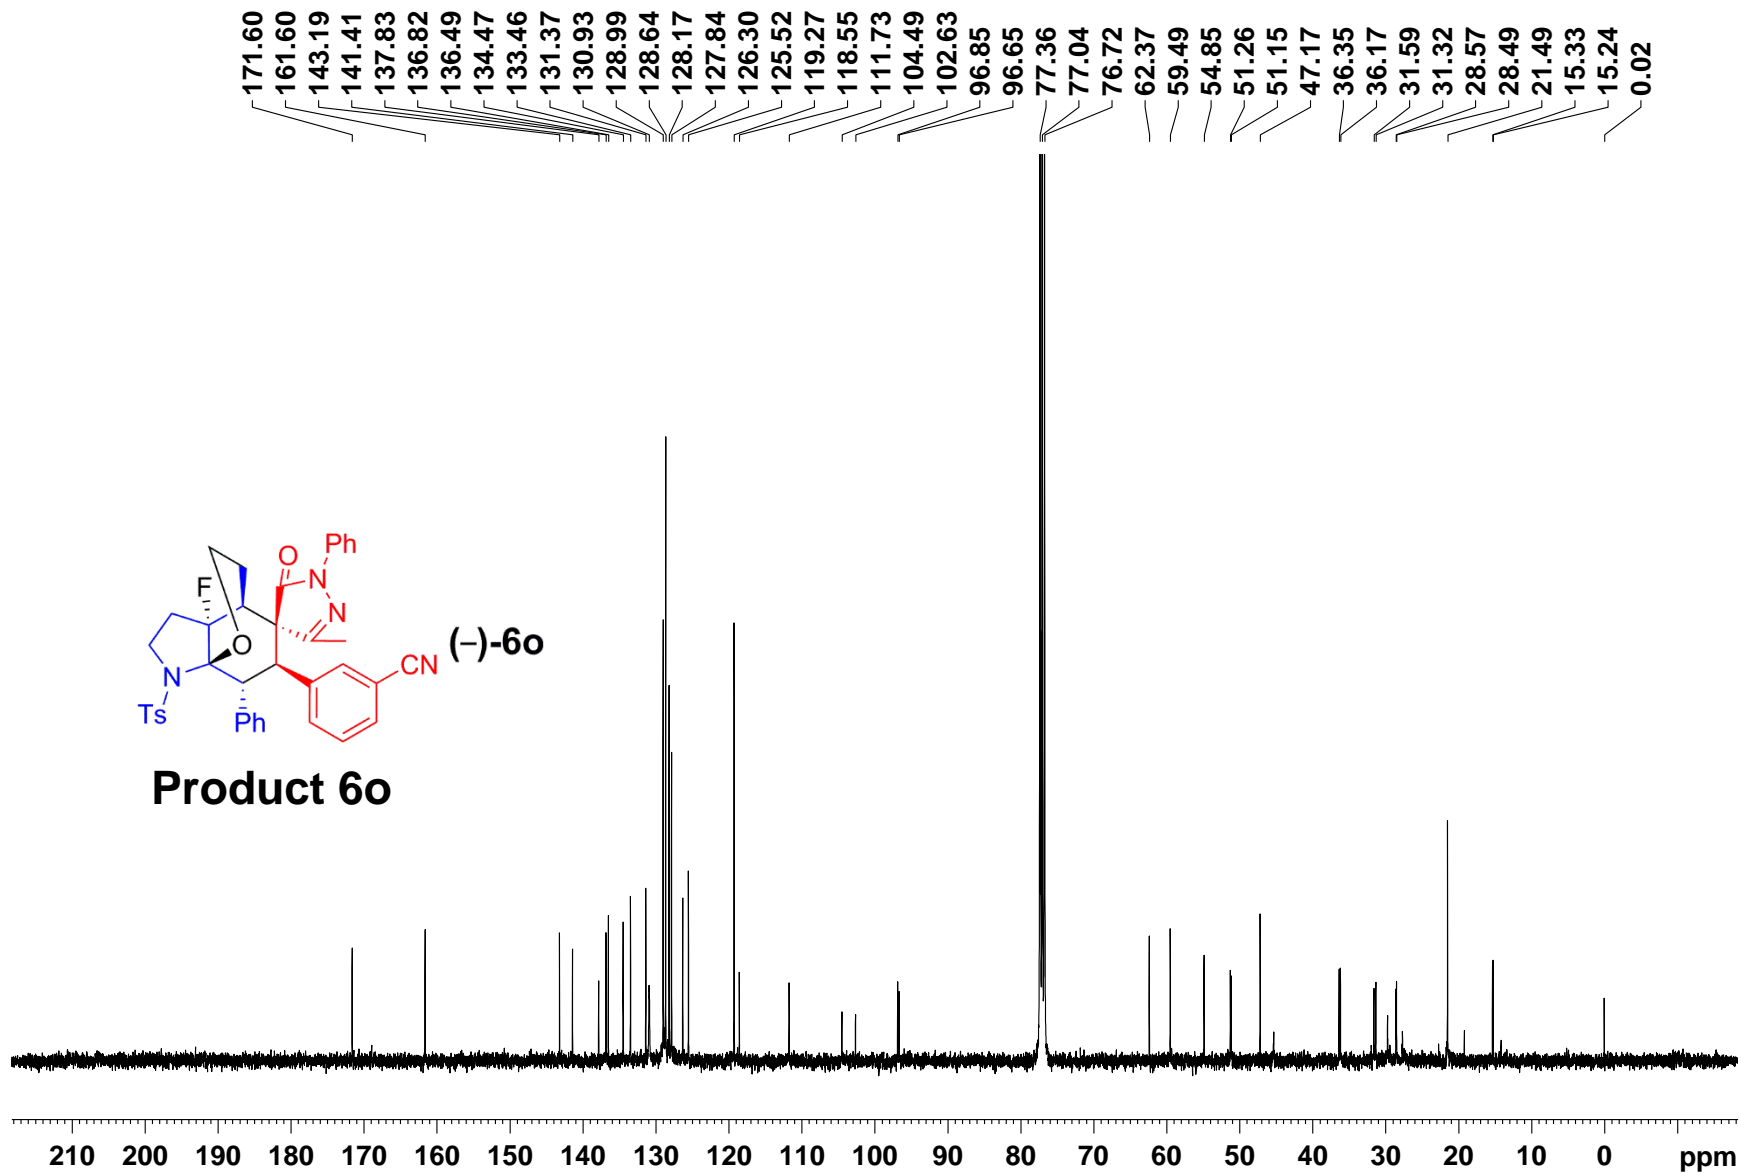

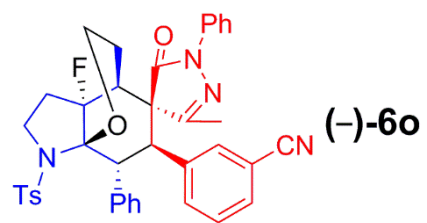

Product 6o

-146.36

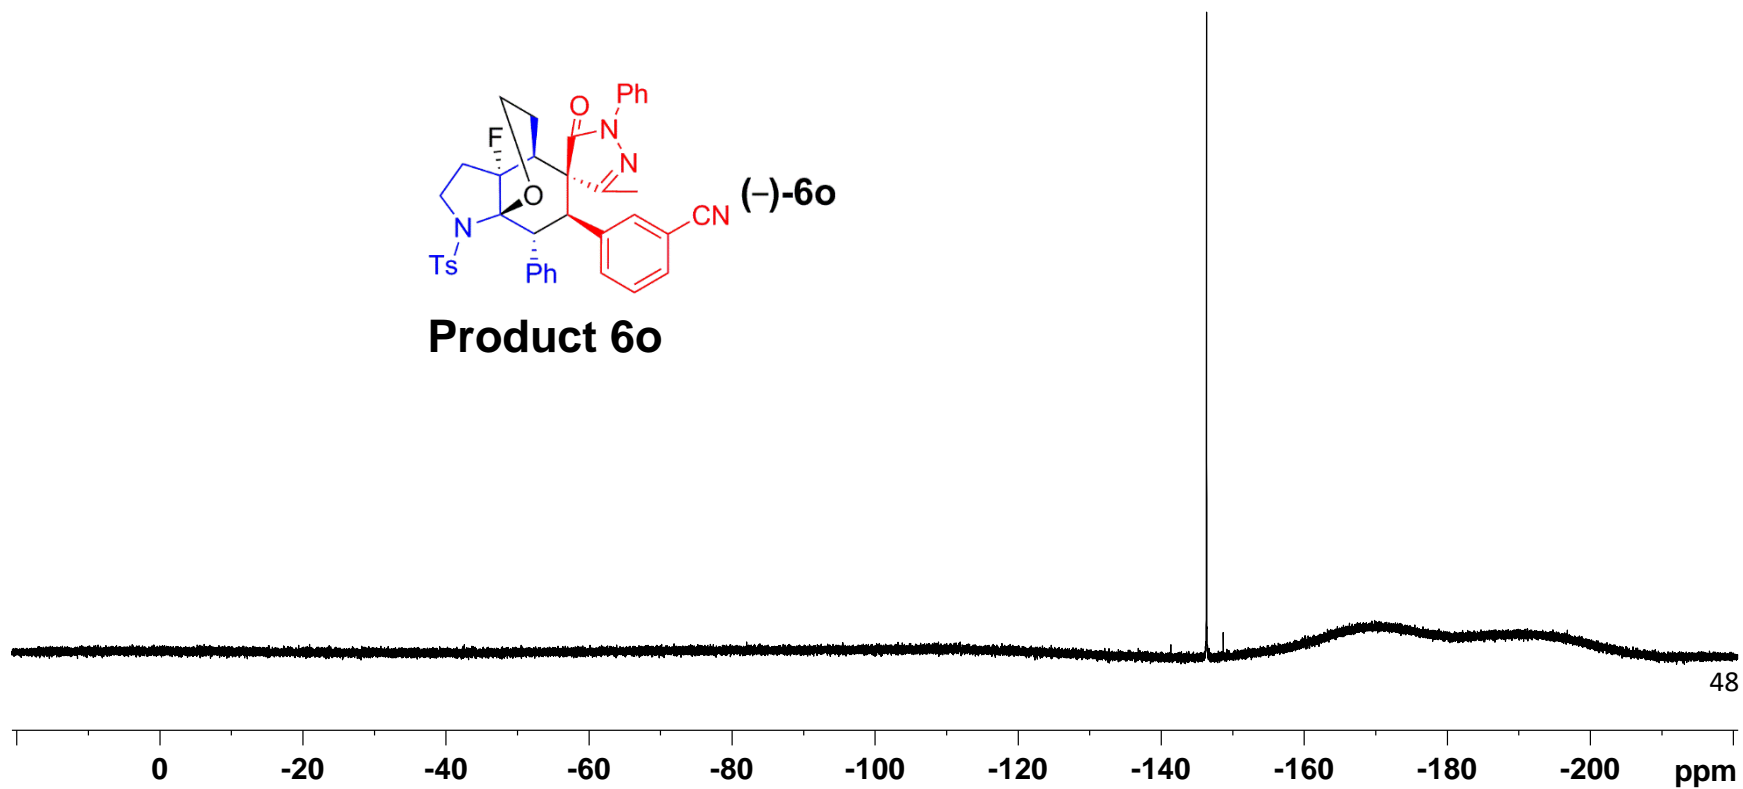



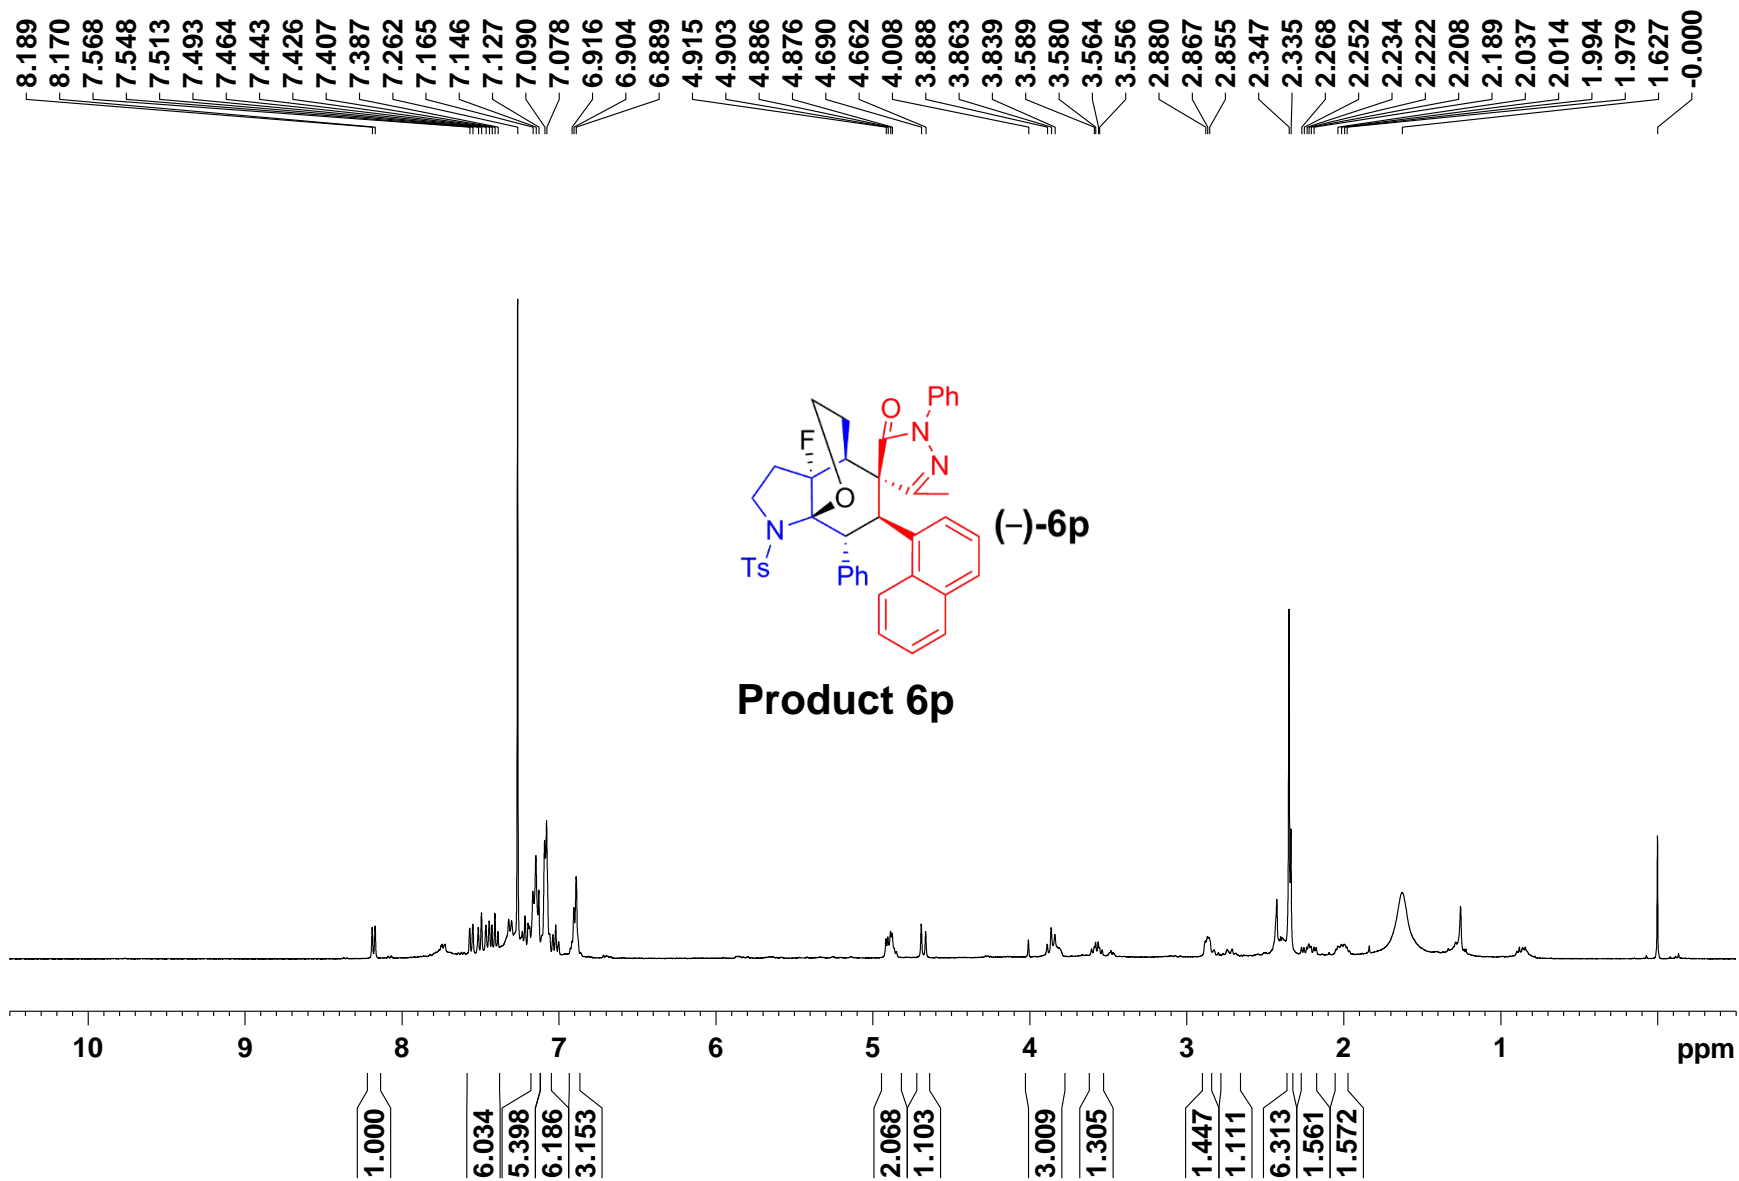

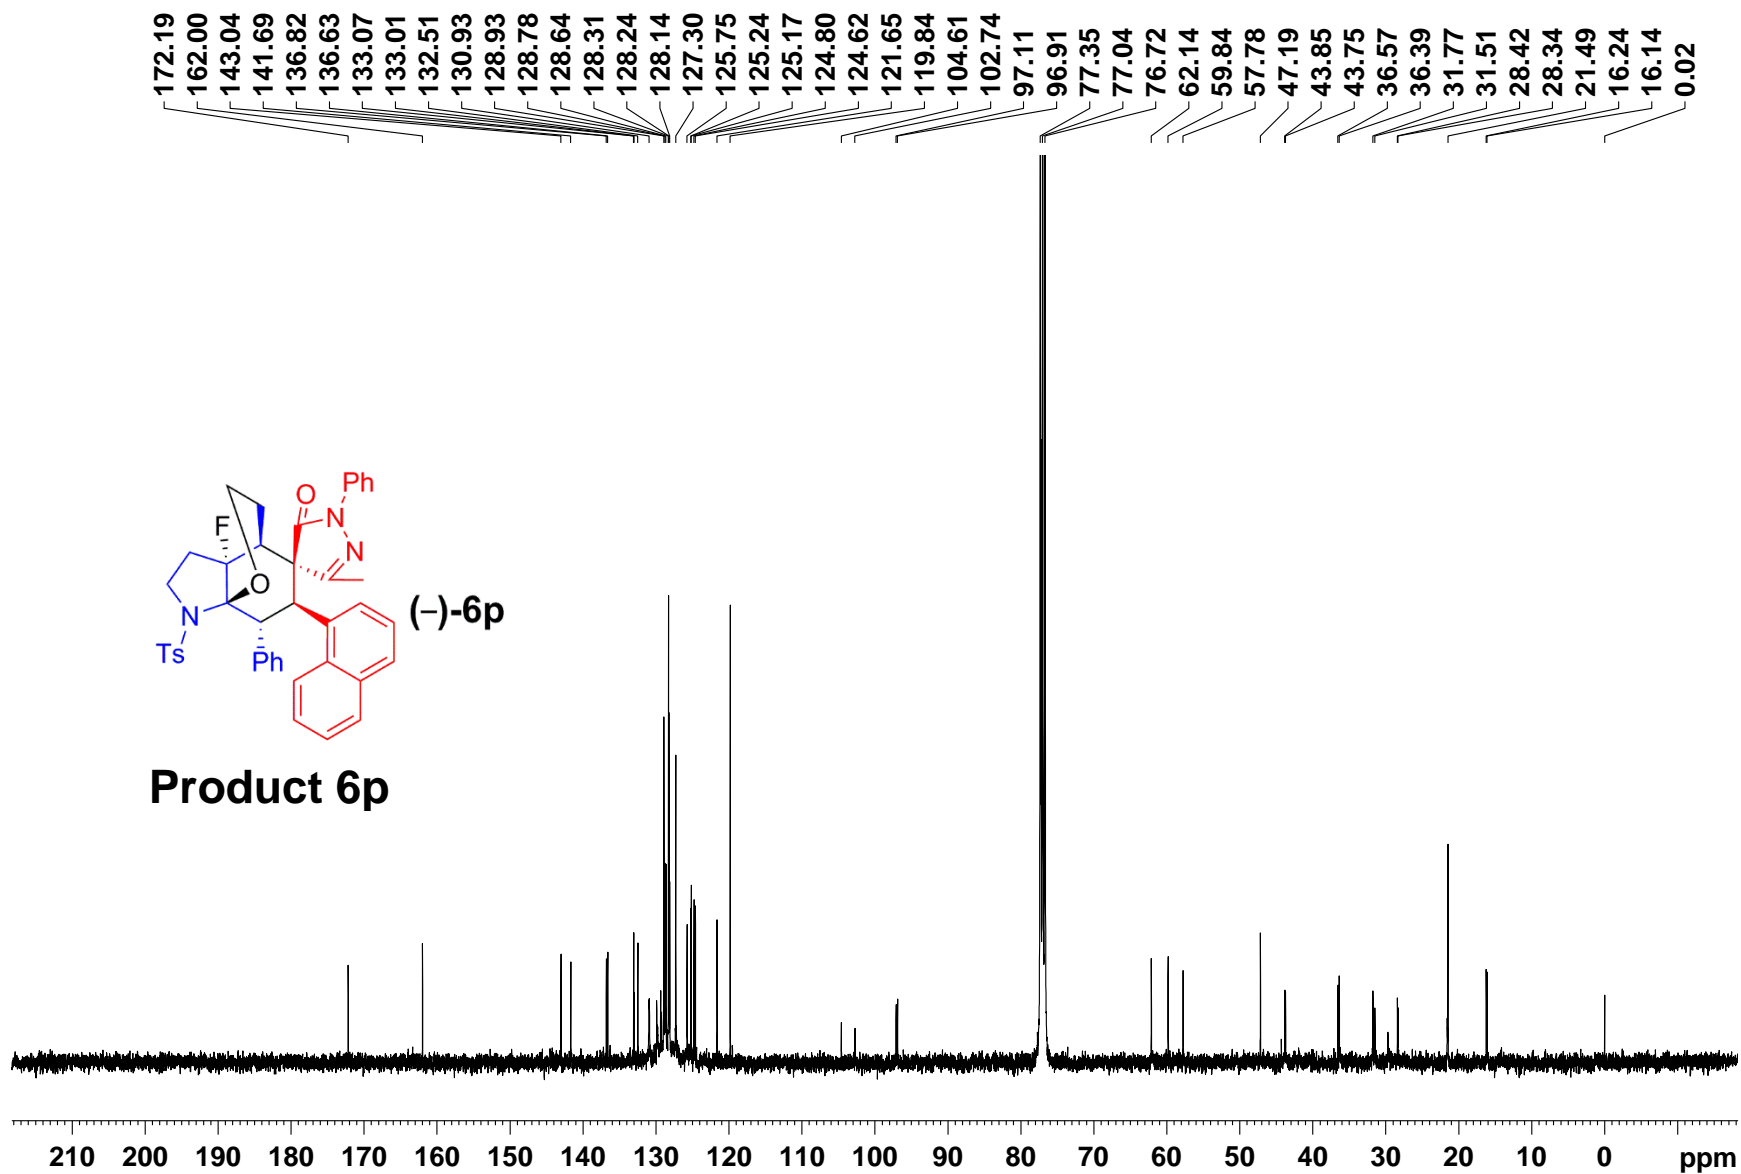

— -146.17

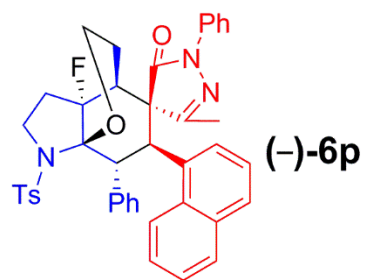

(-)-6p

**Product 6p**

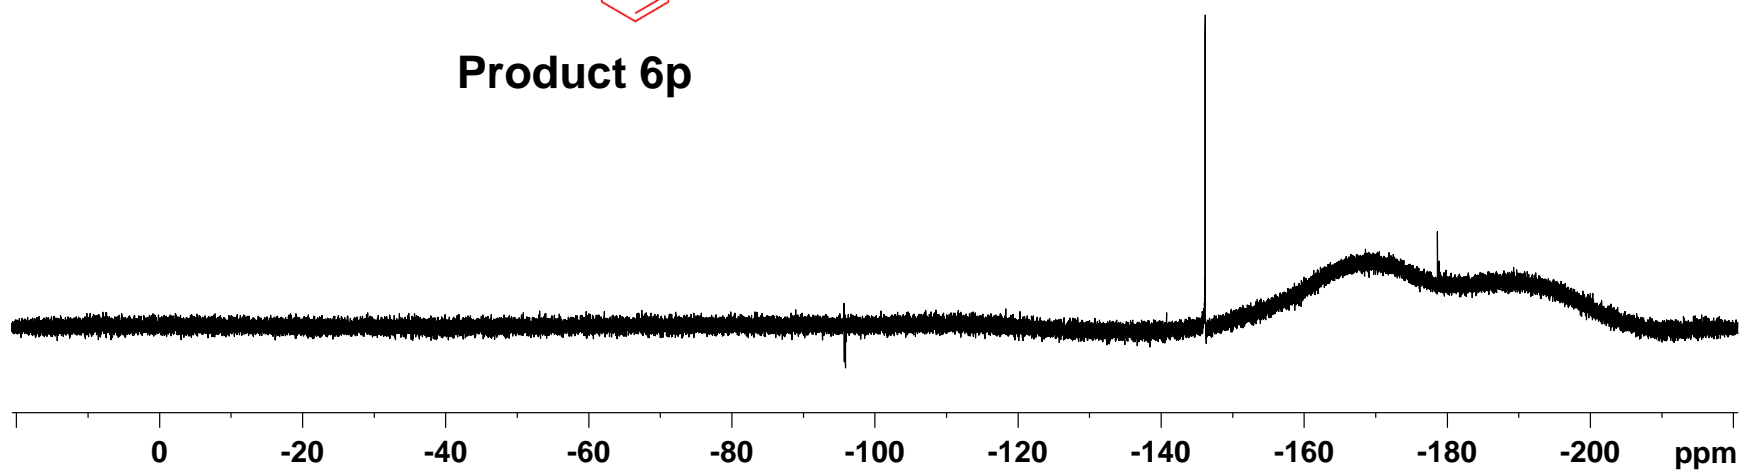

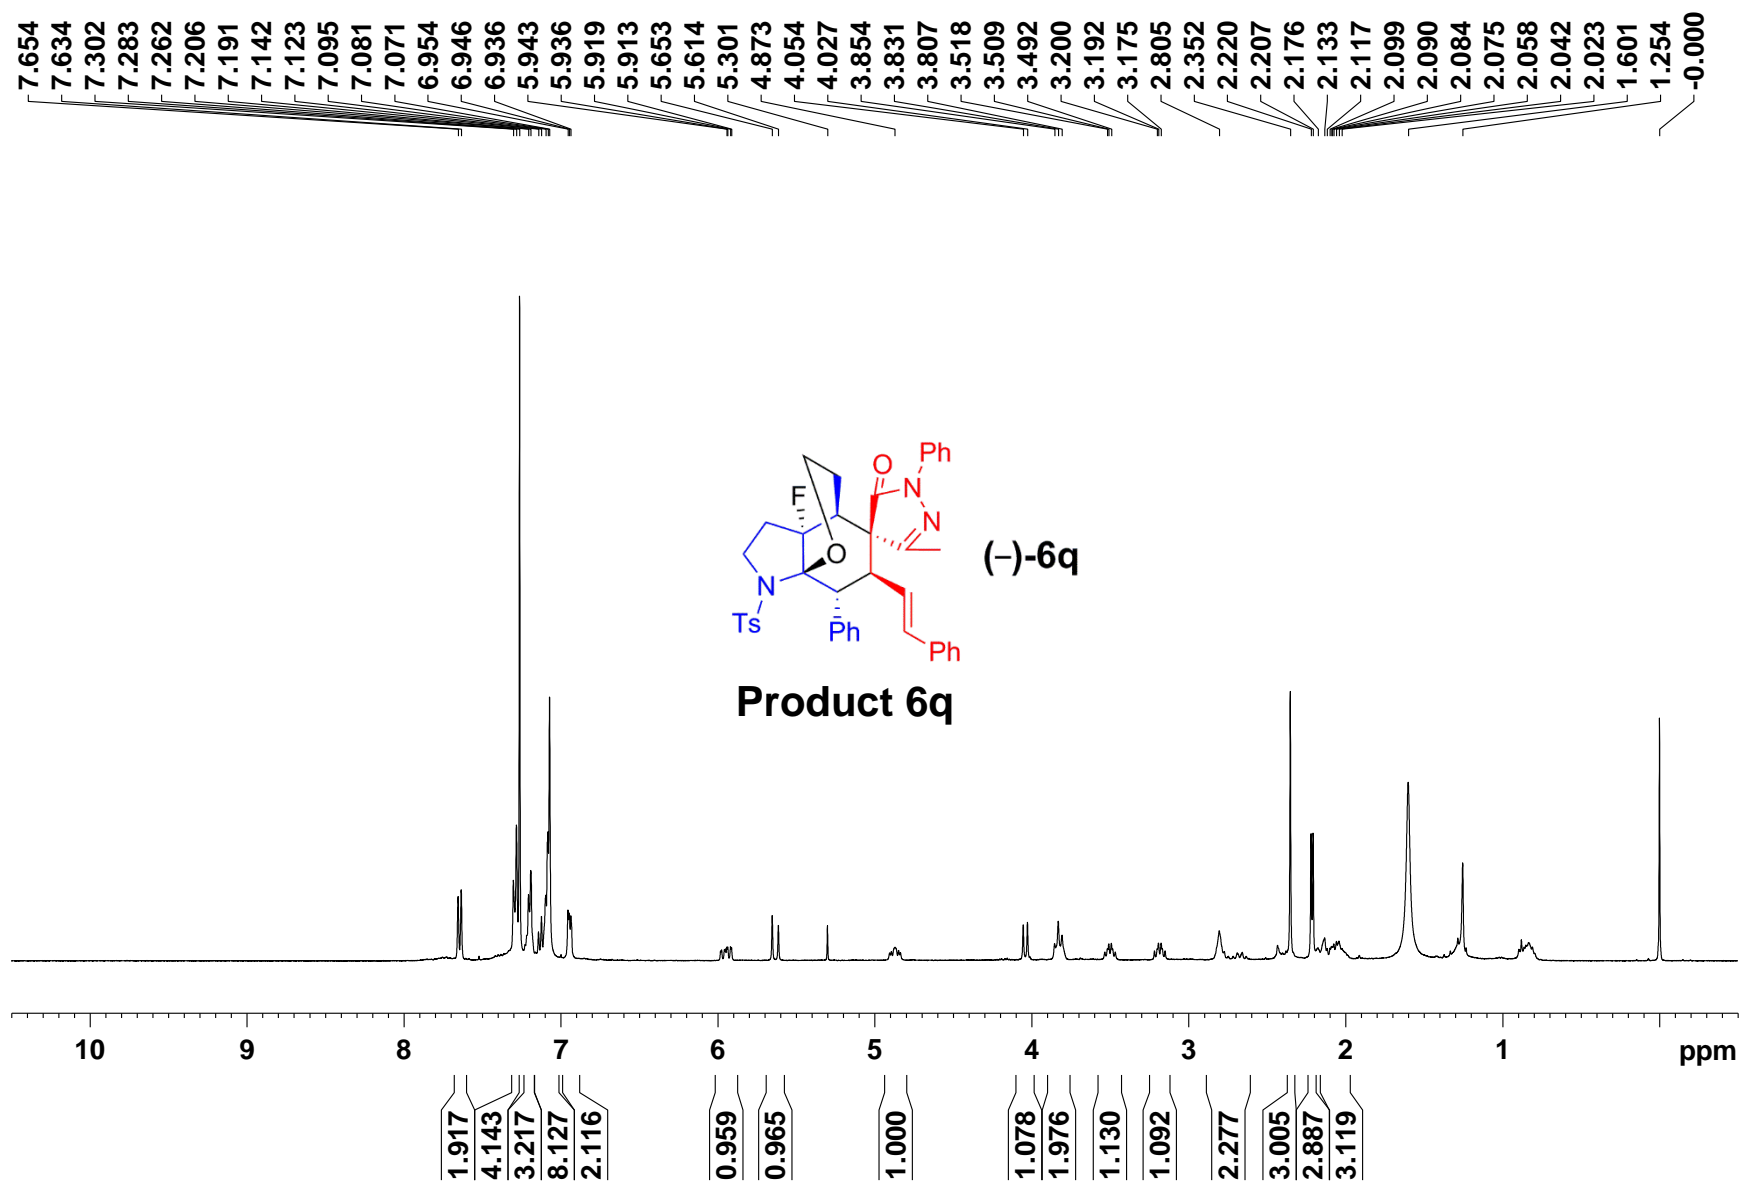

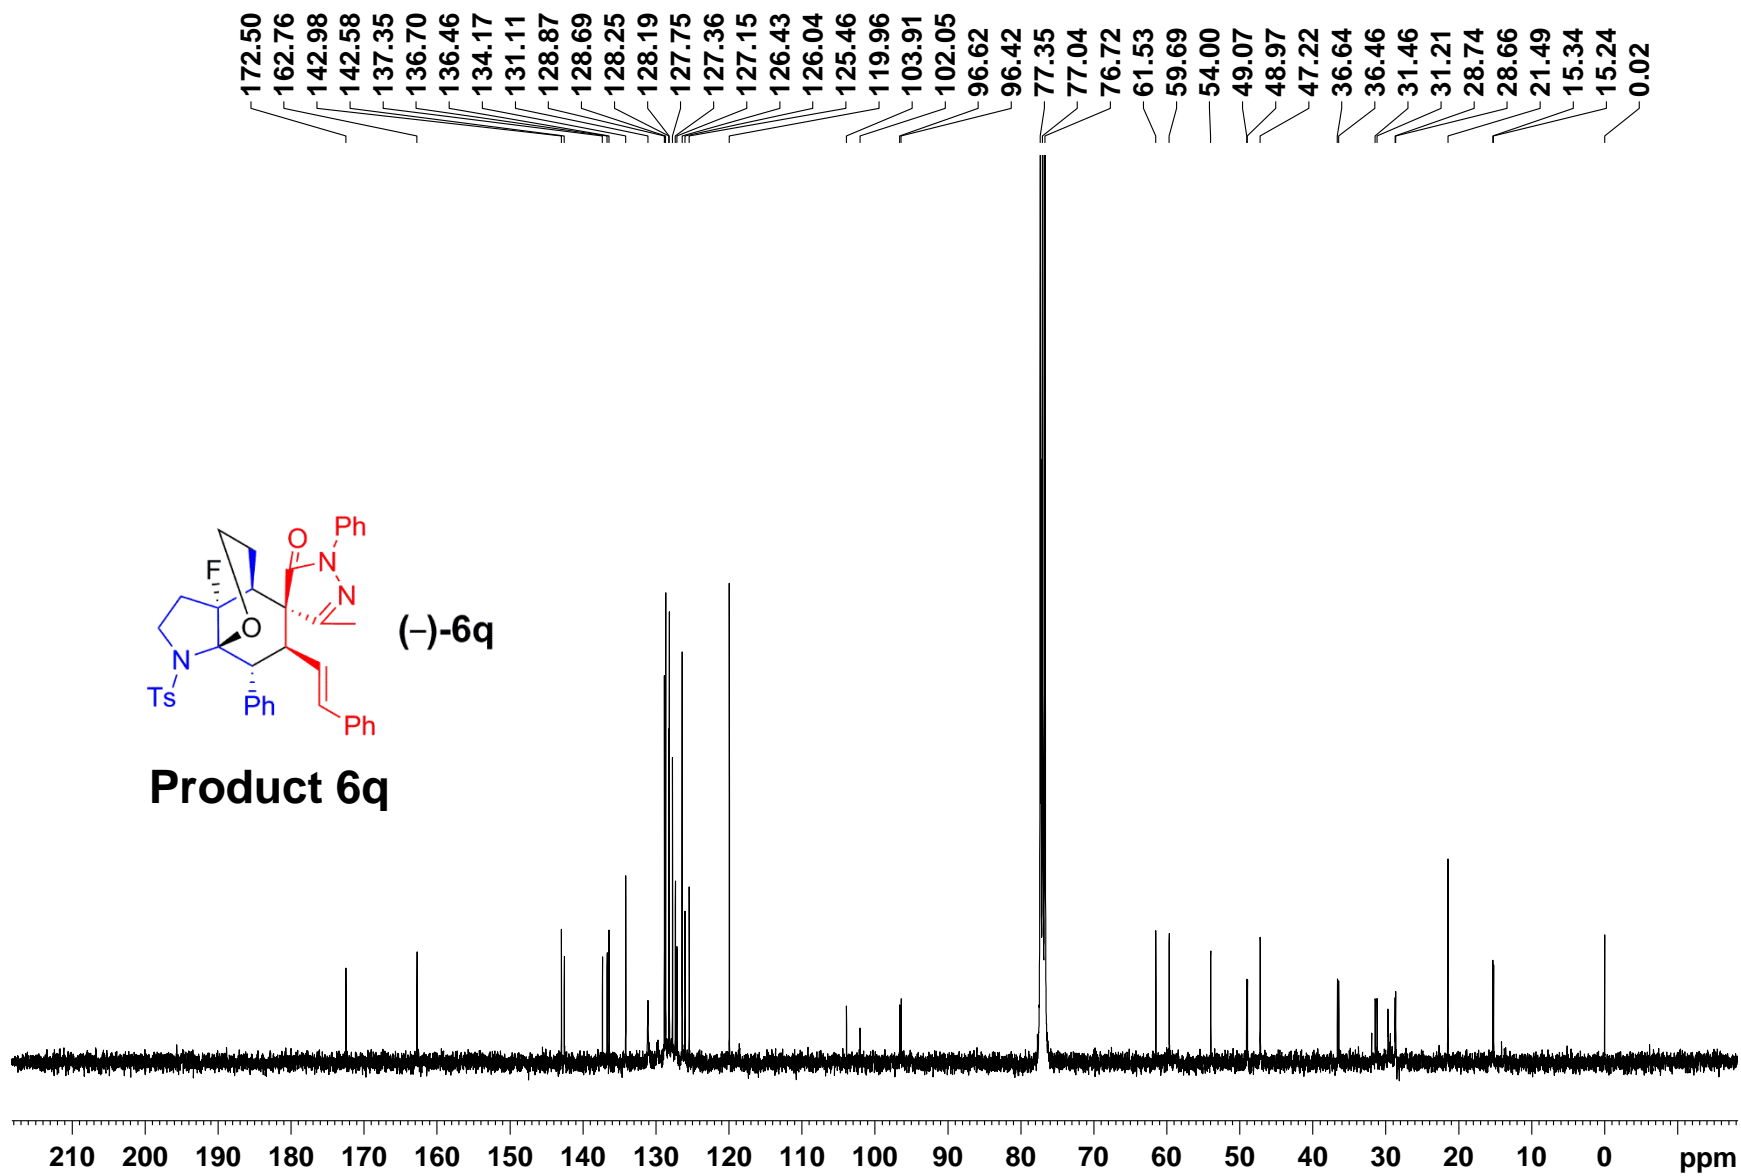

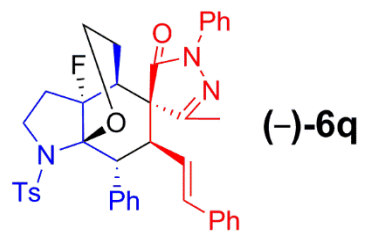

Product 6q

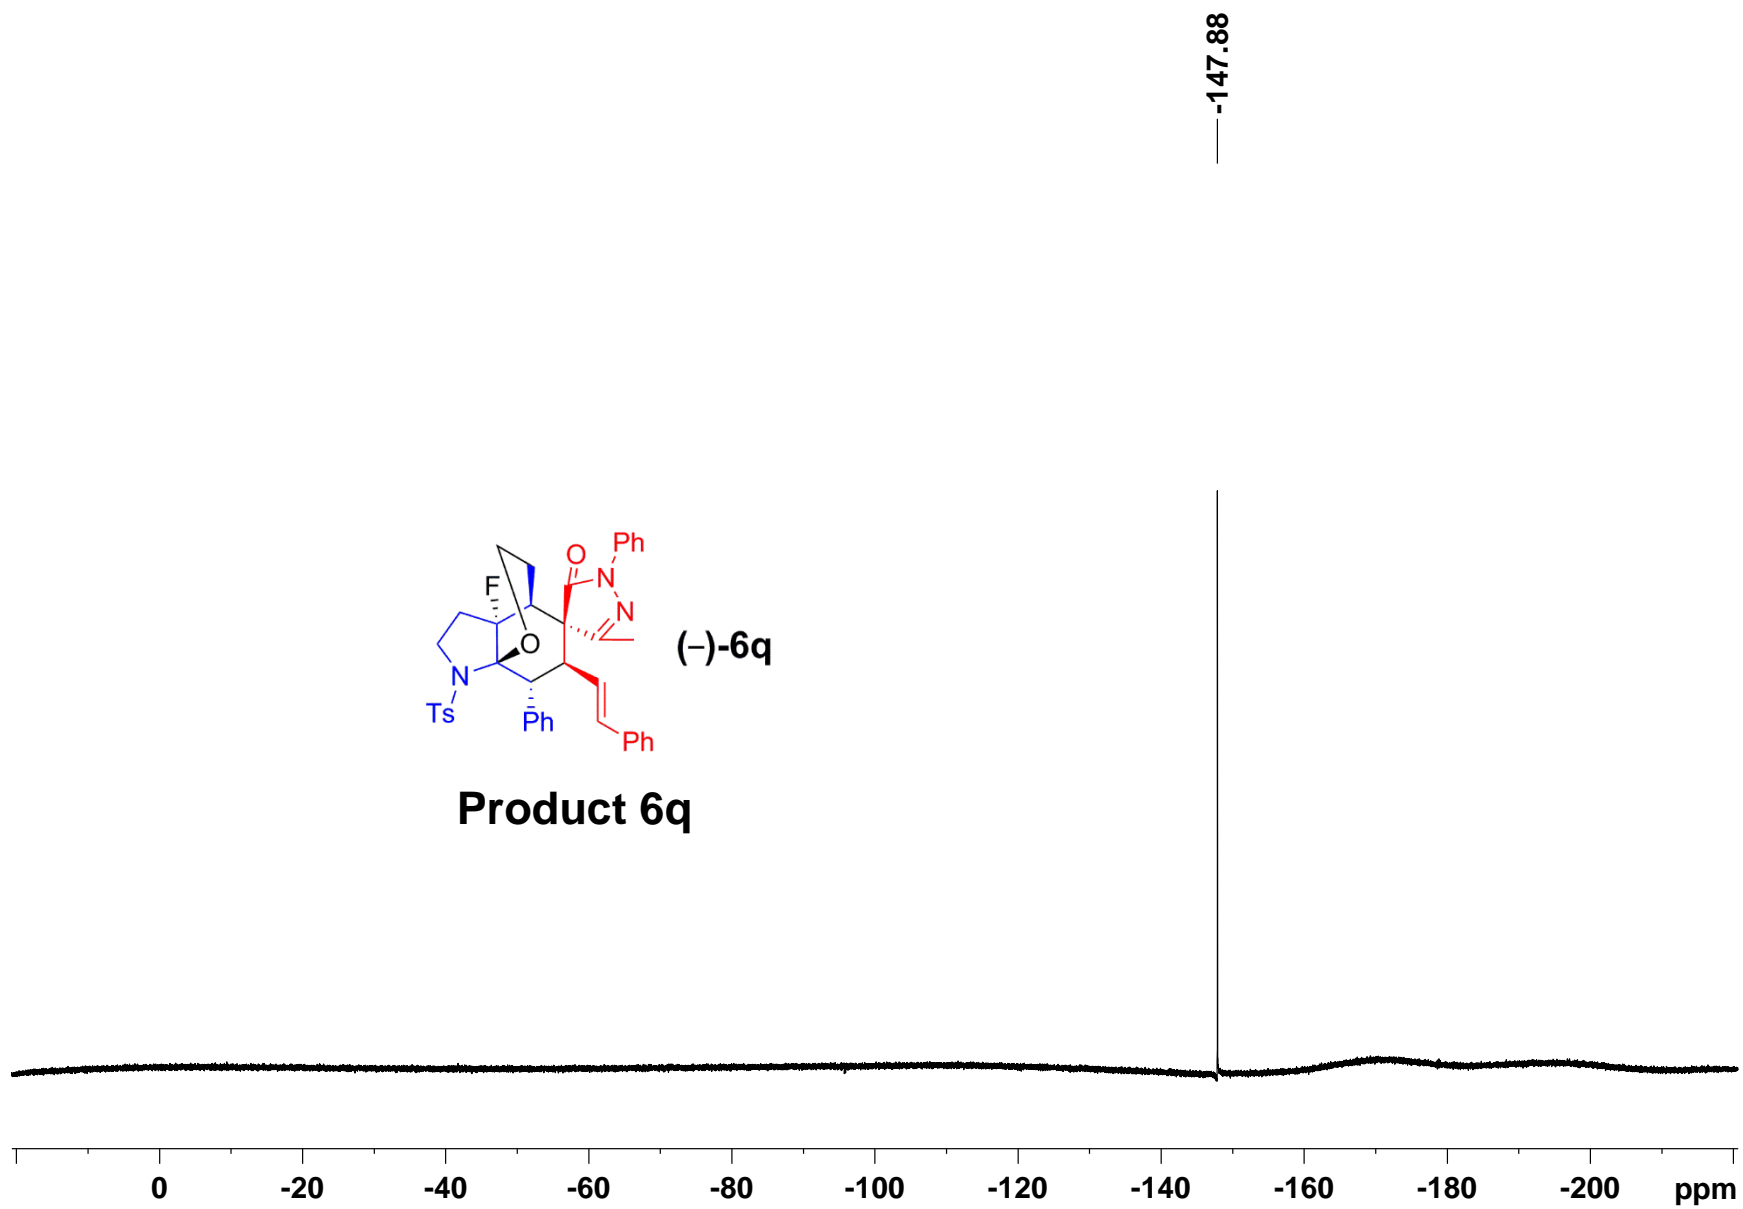

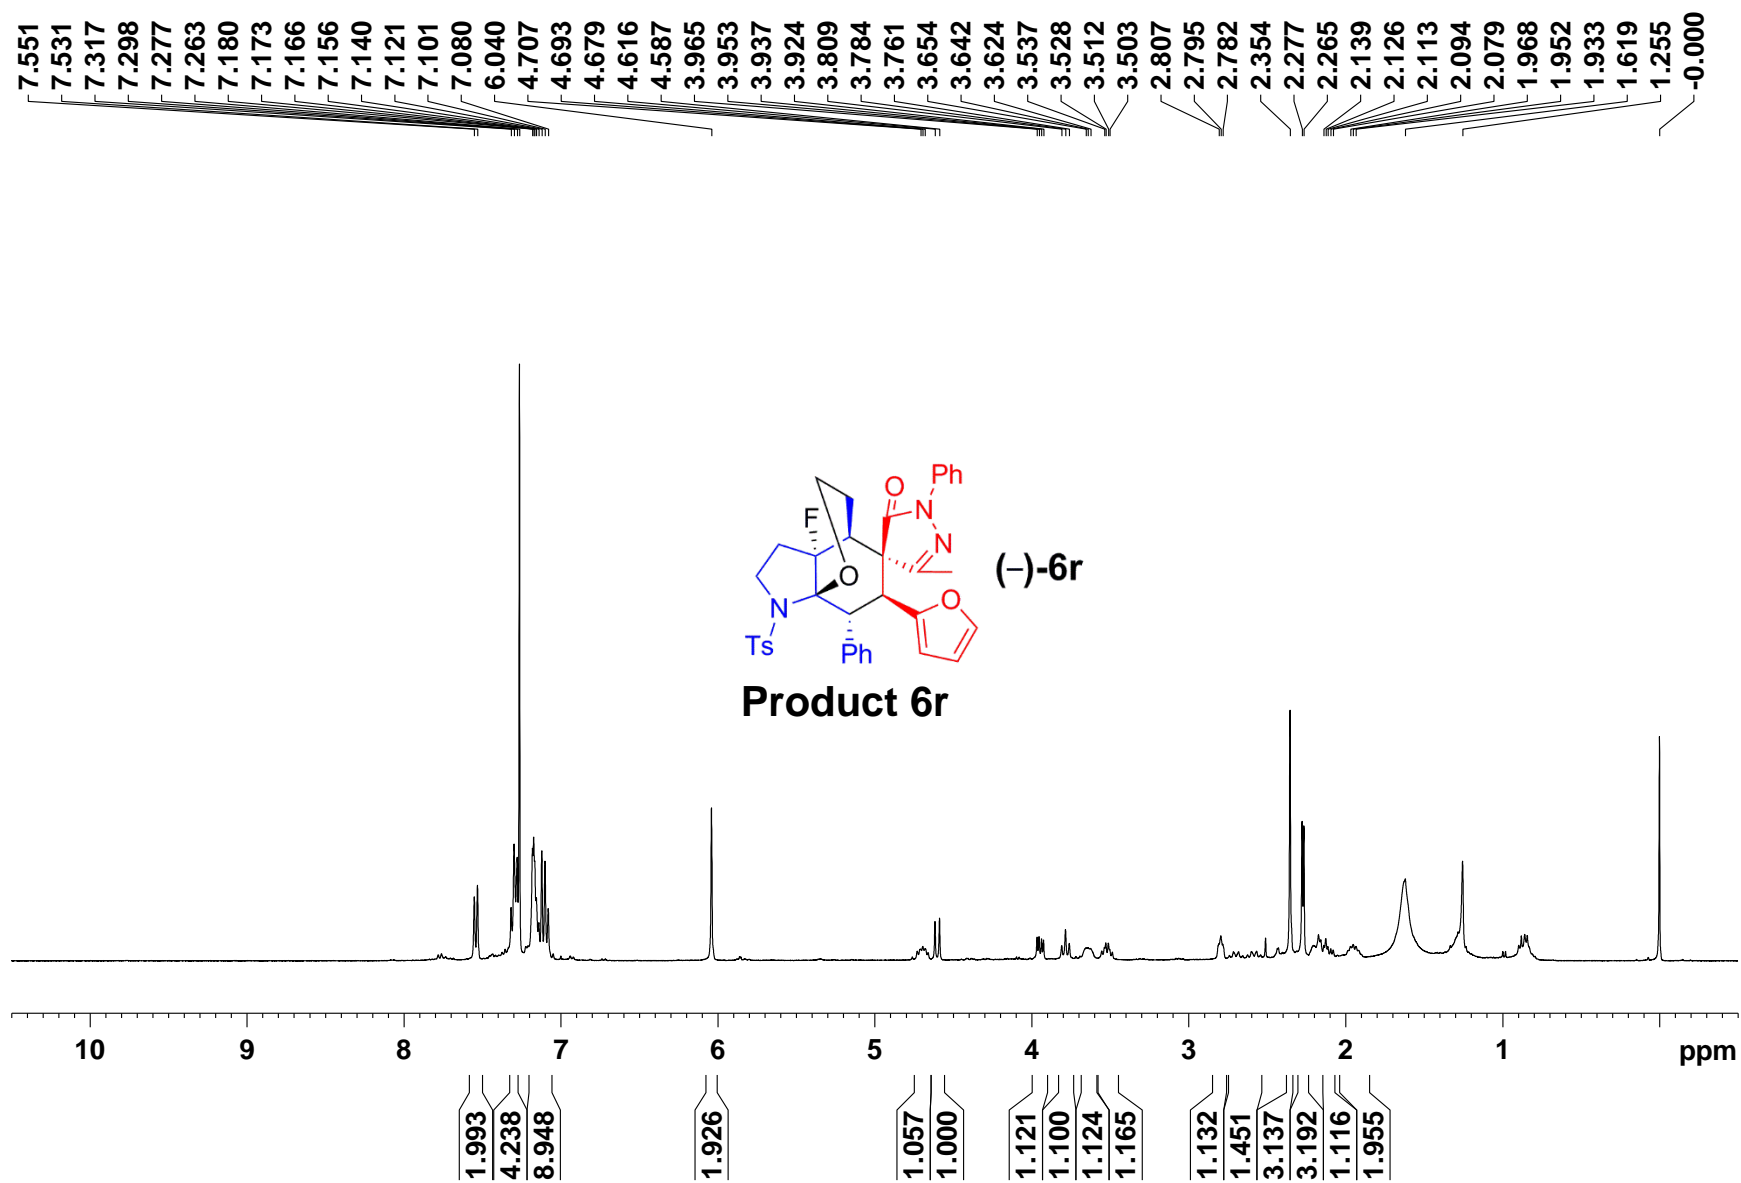

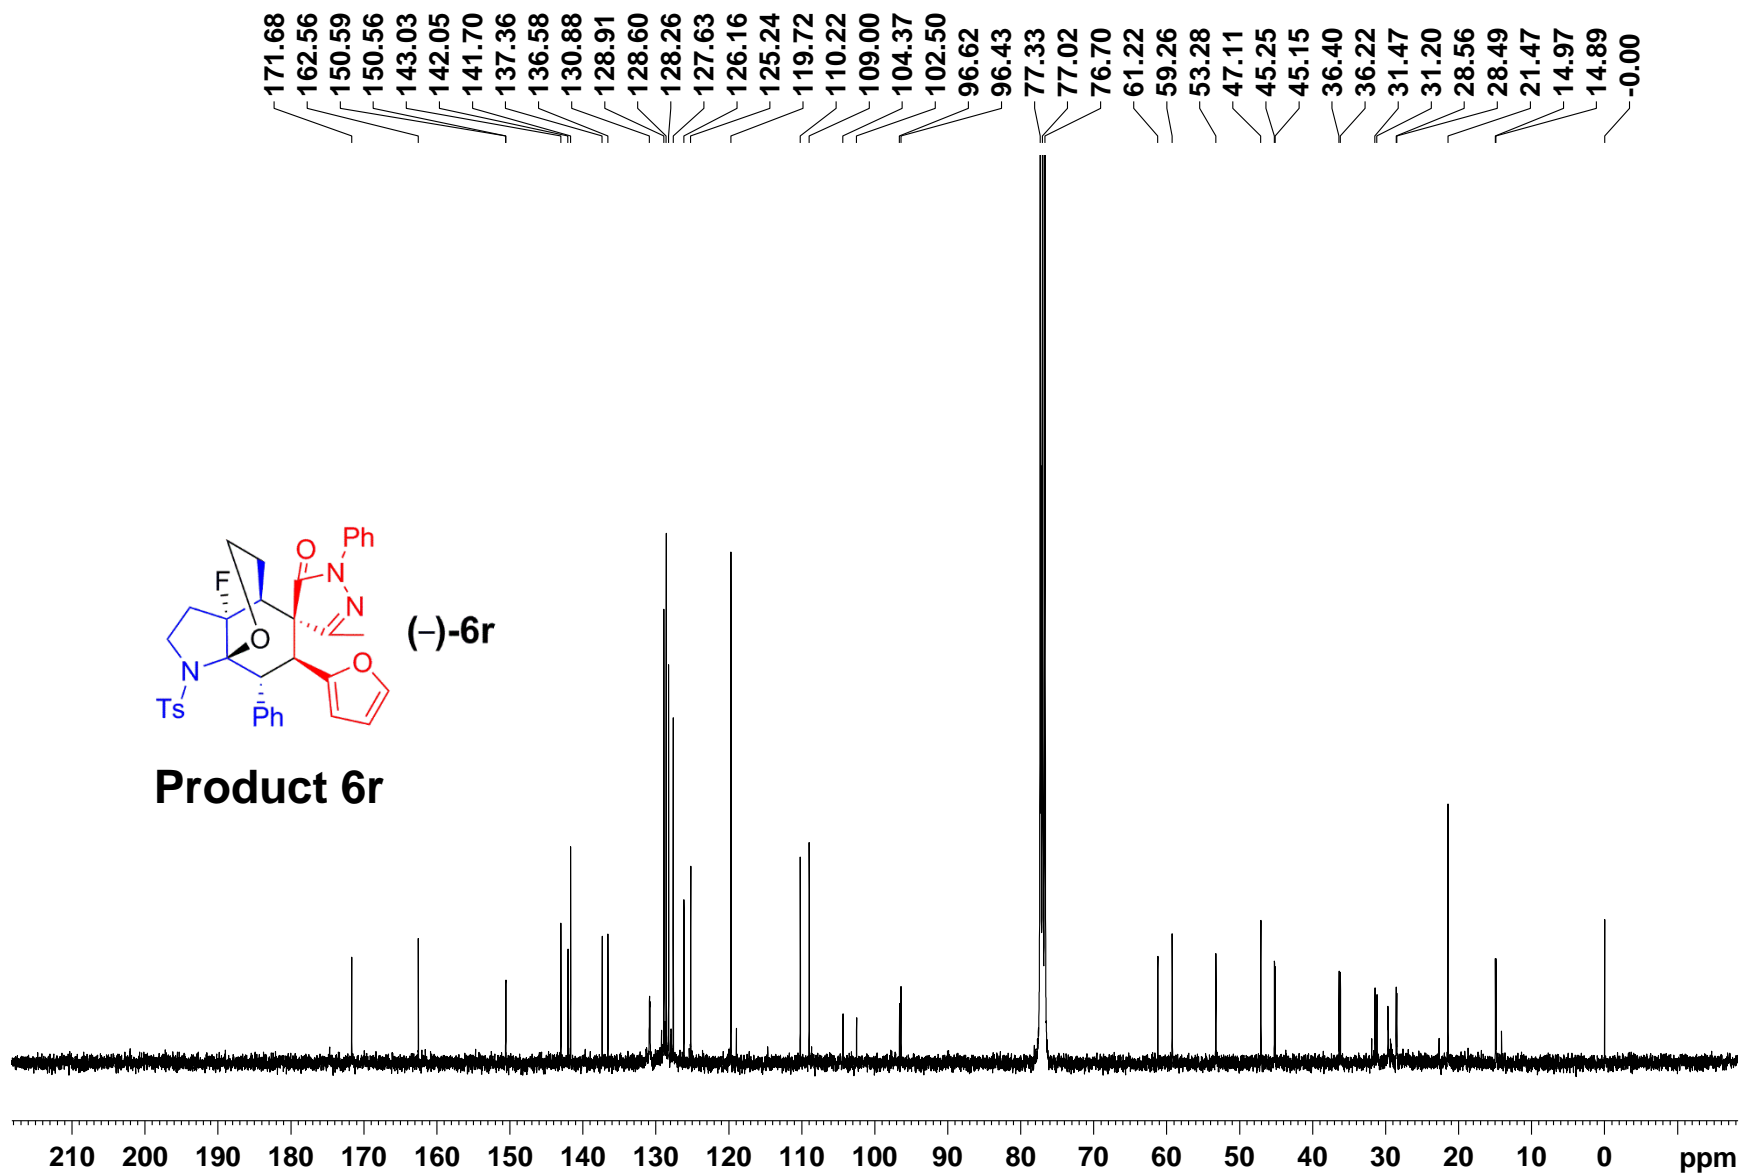



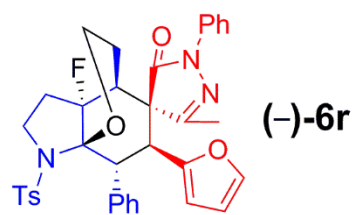

Product 6r

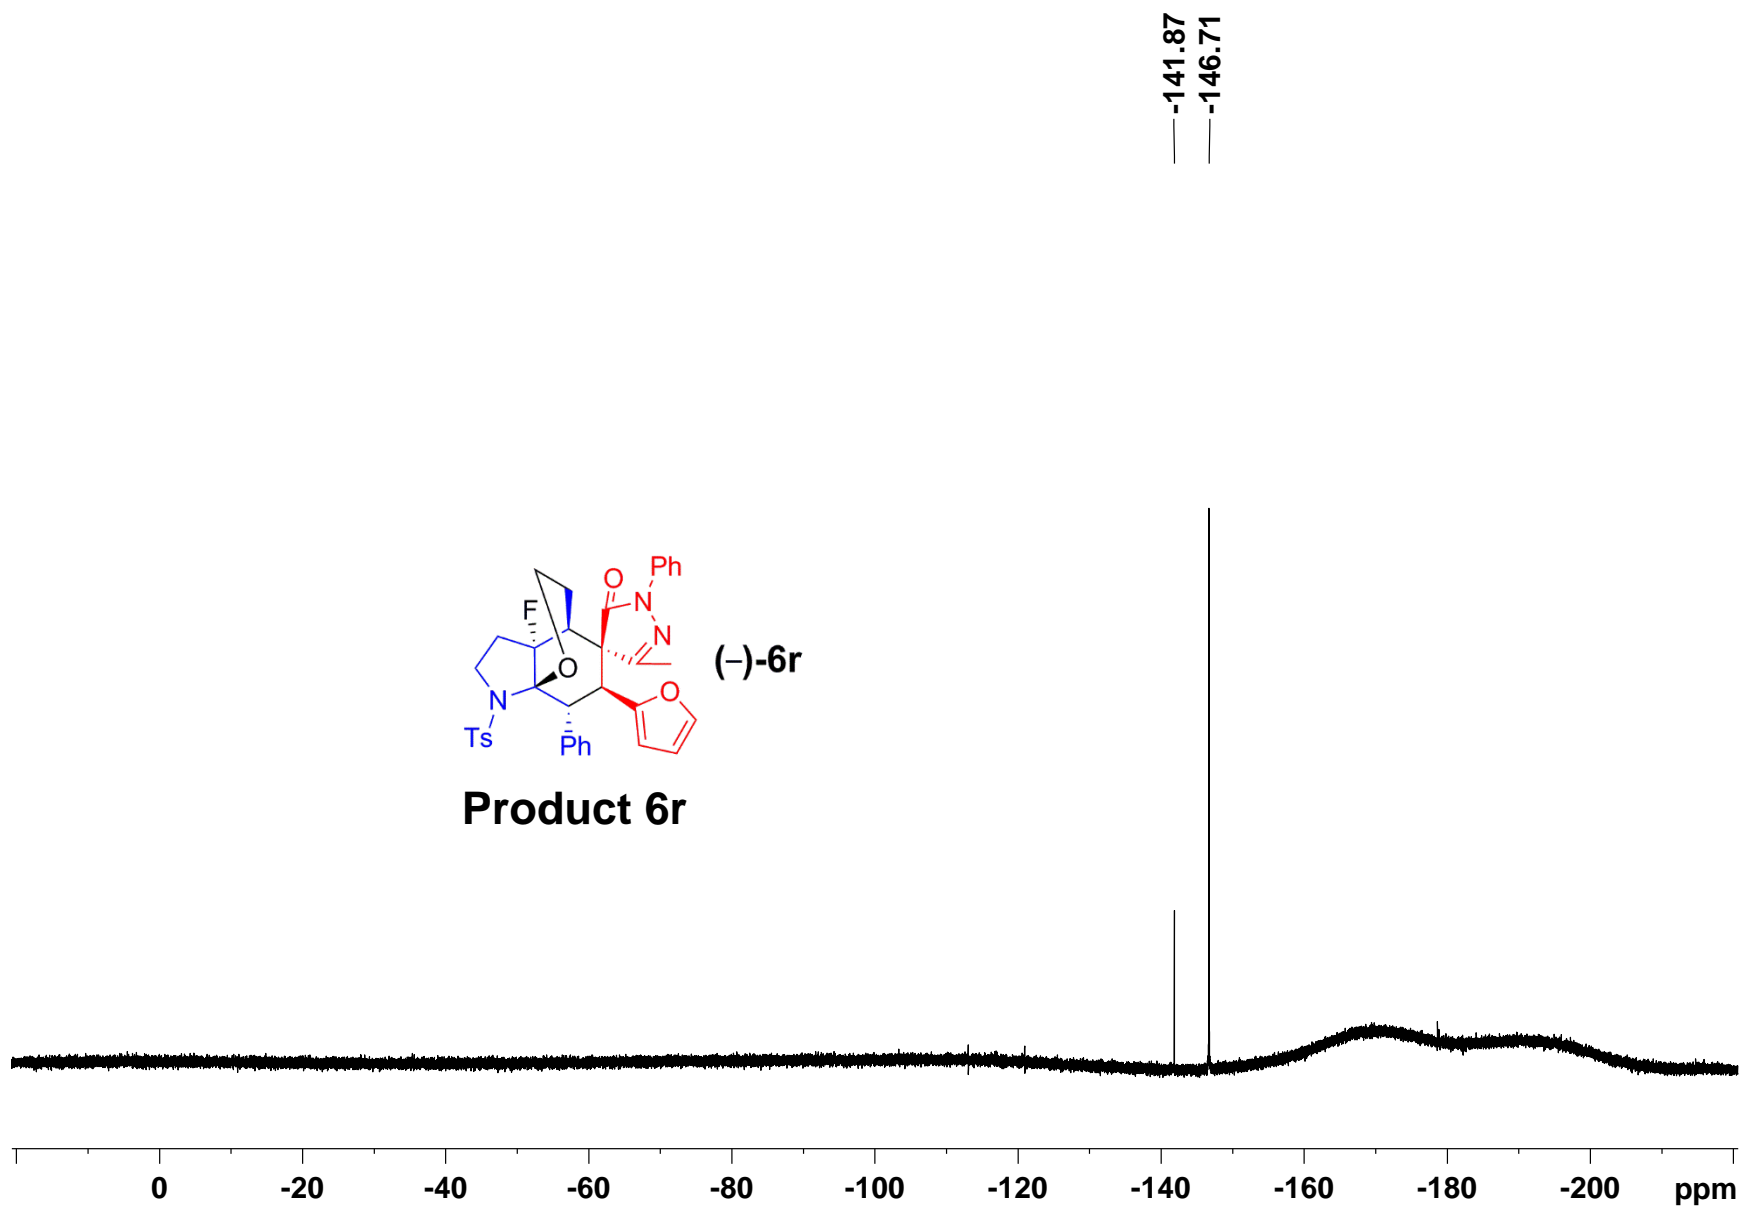

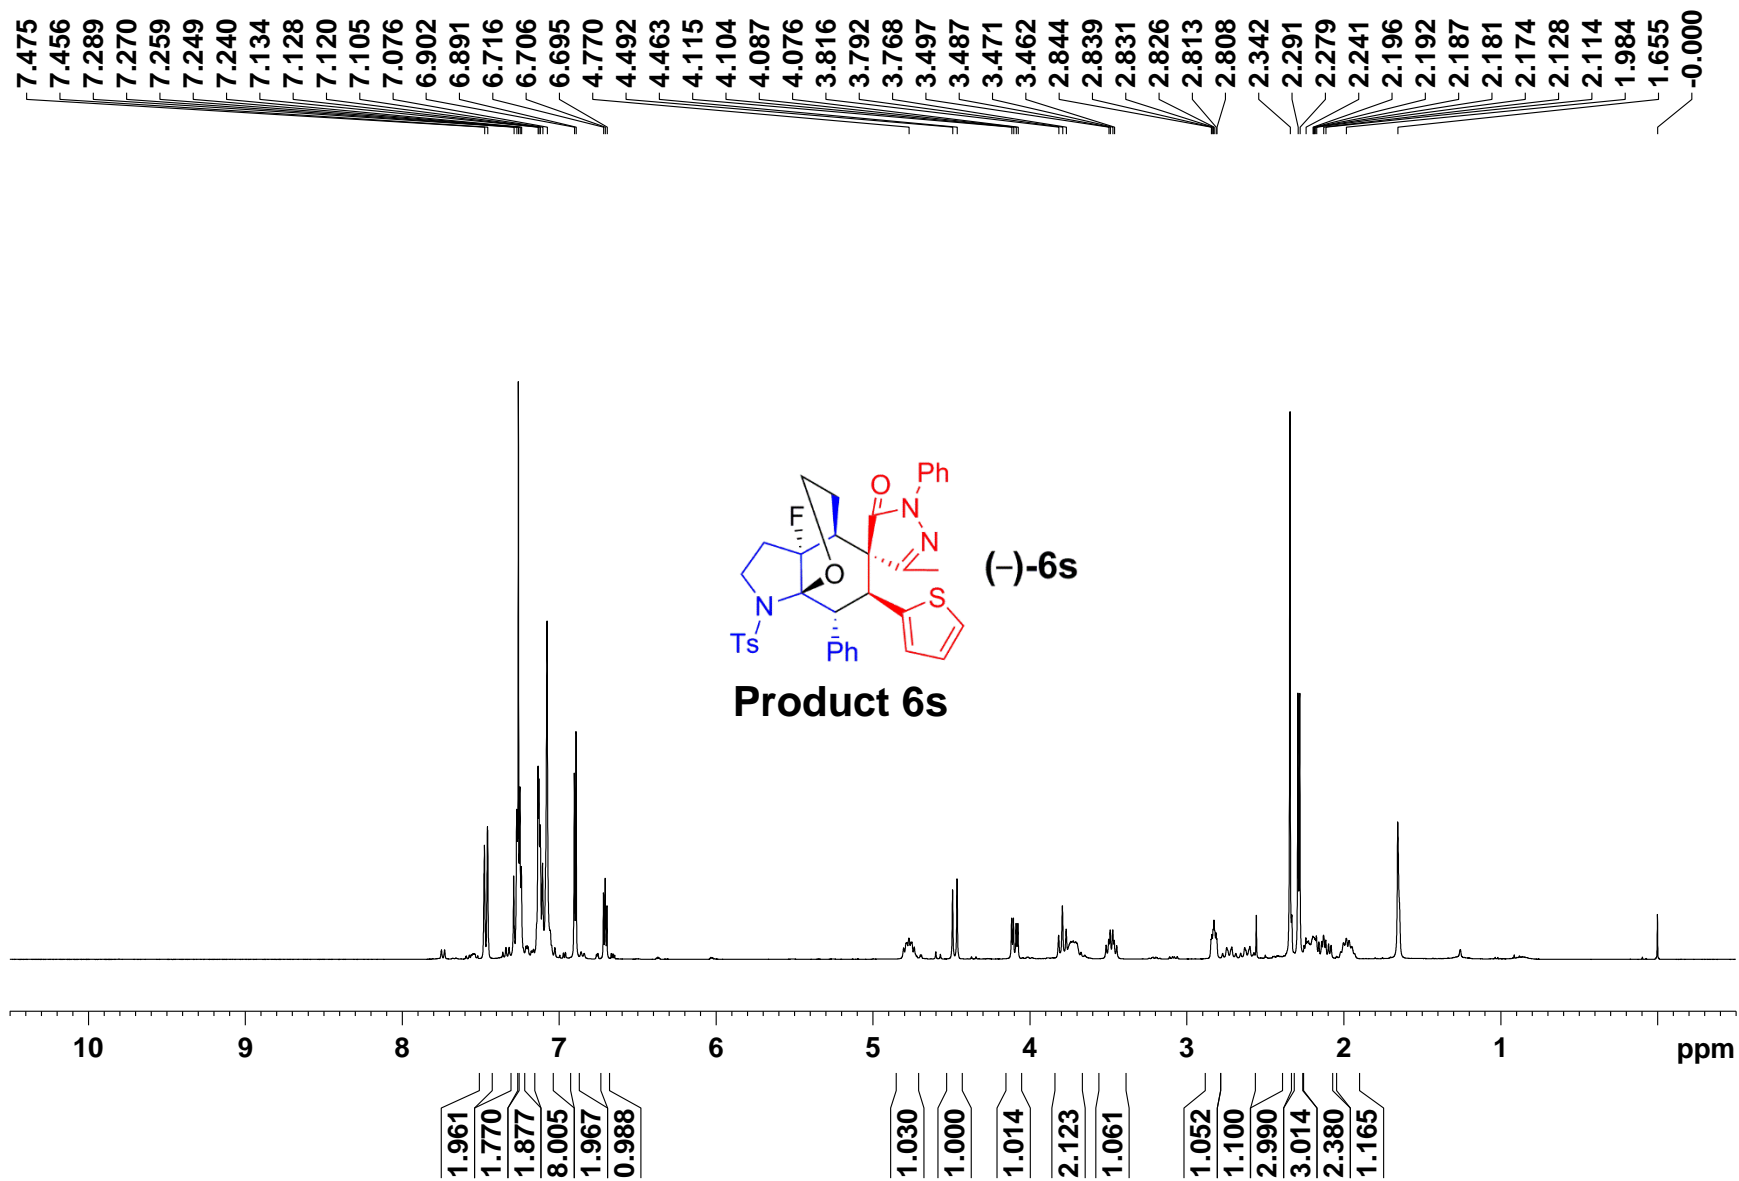

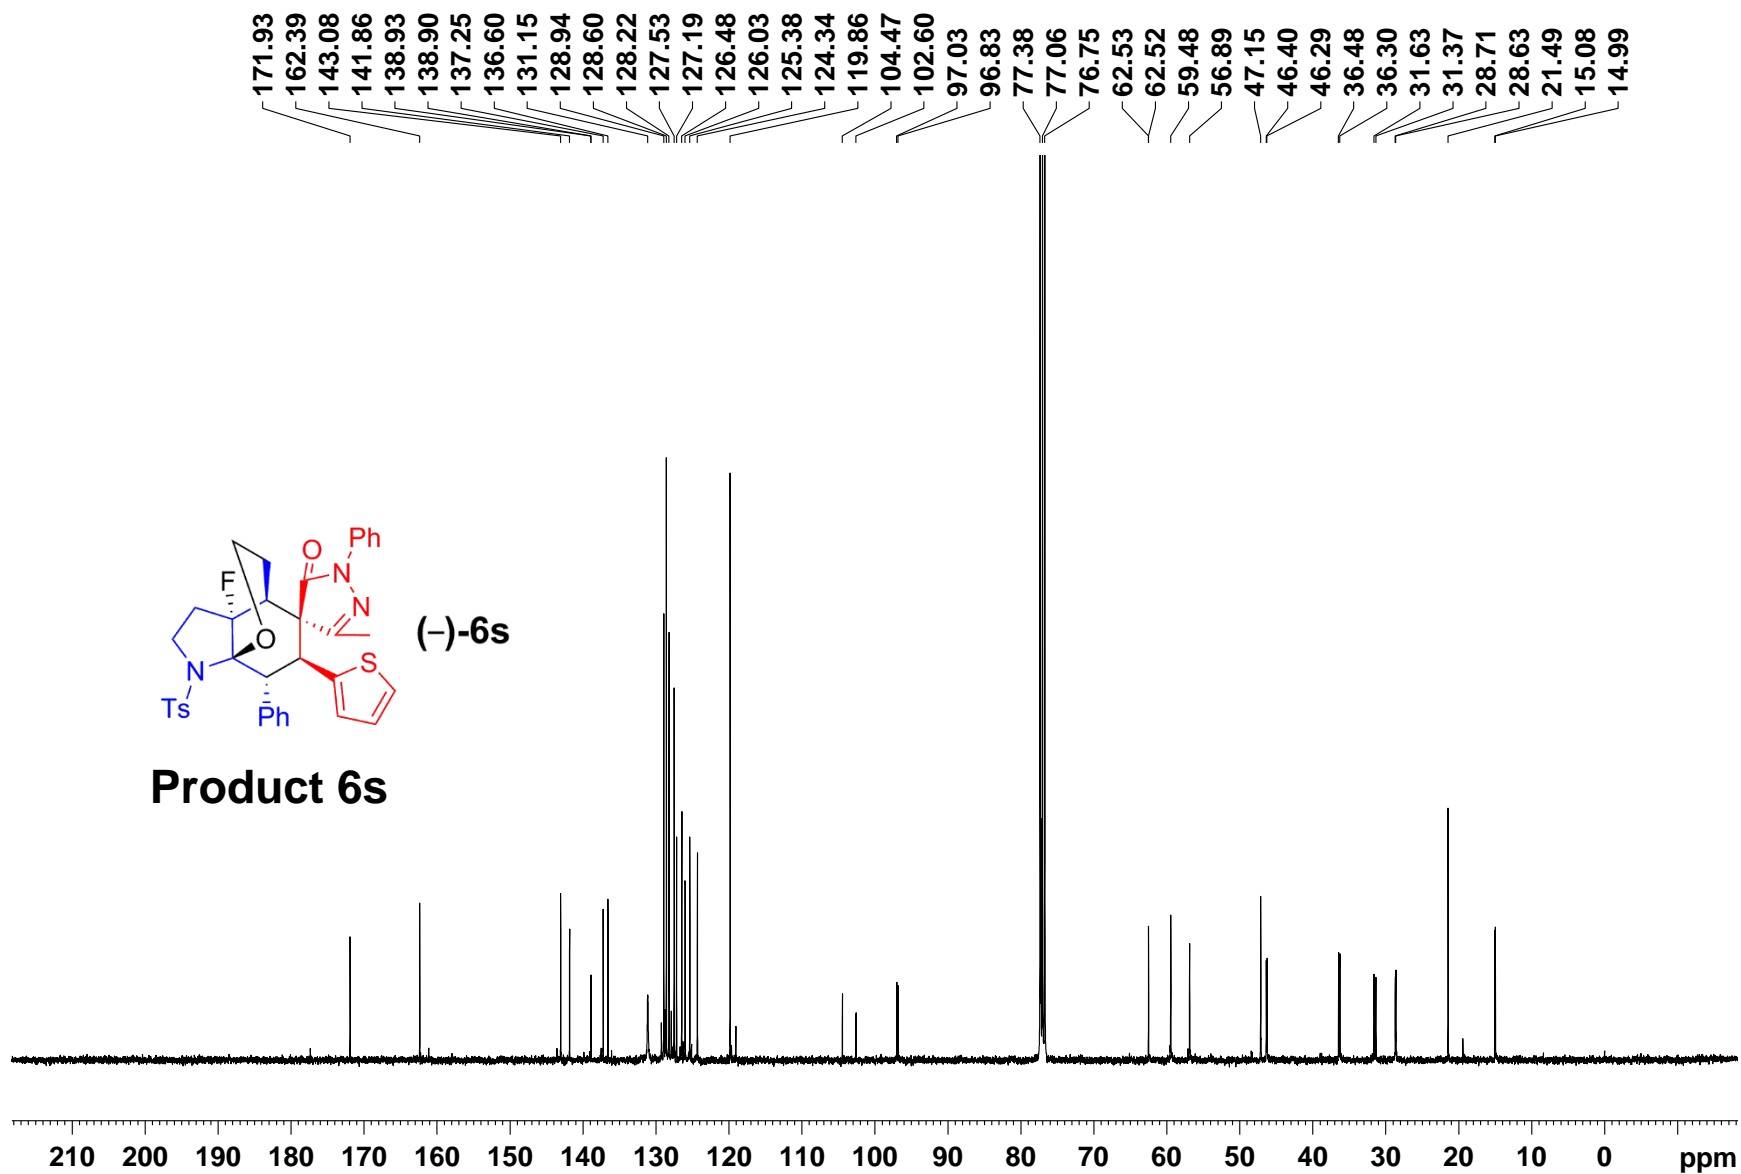

-141.78  
-146.36

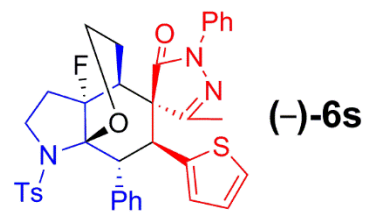

**Product 6s**

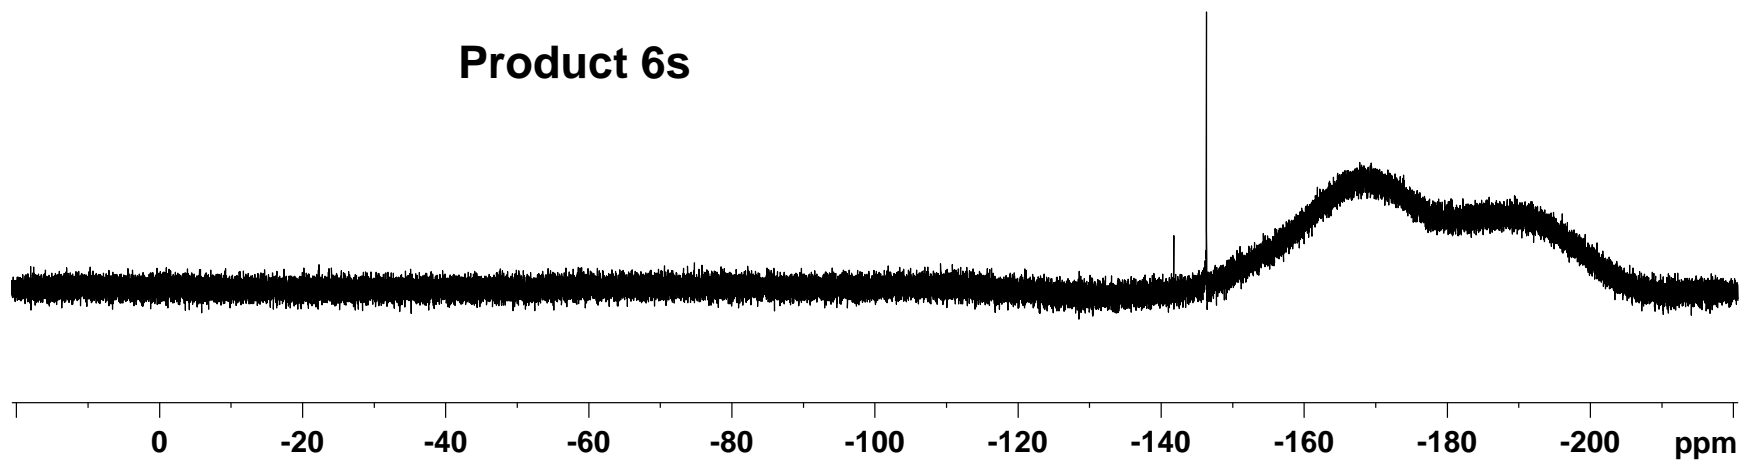

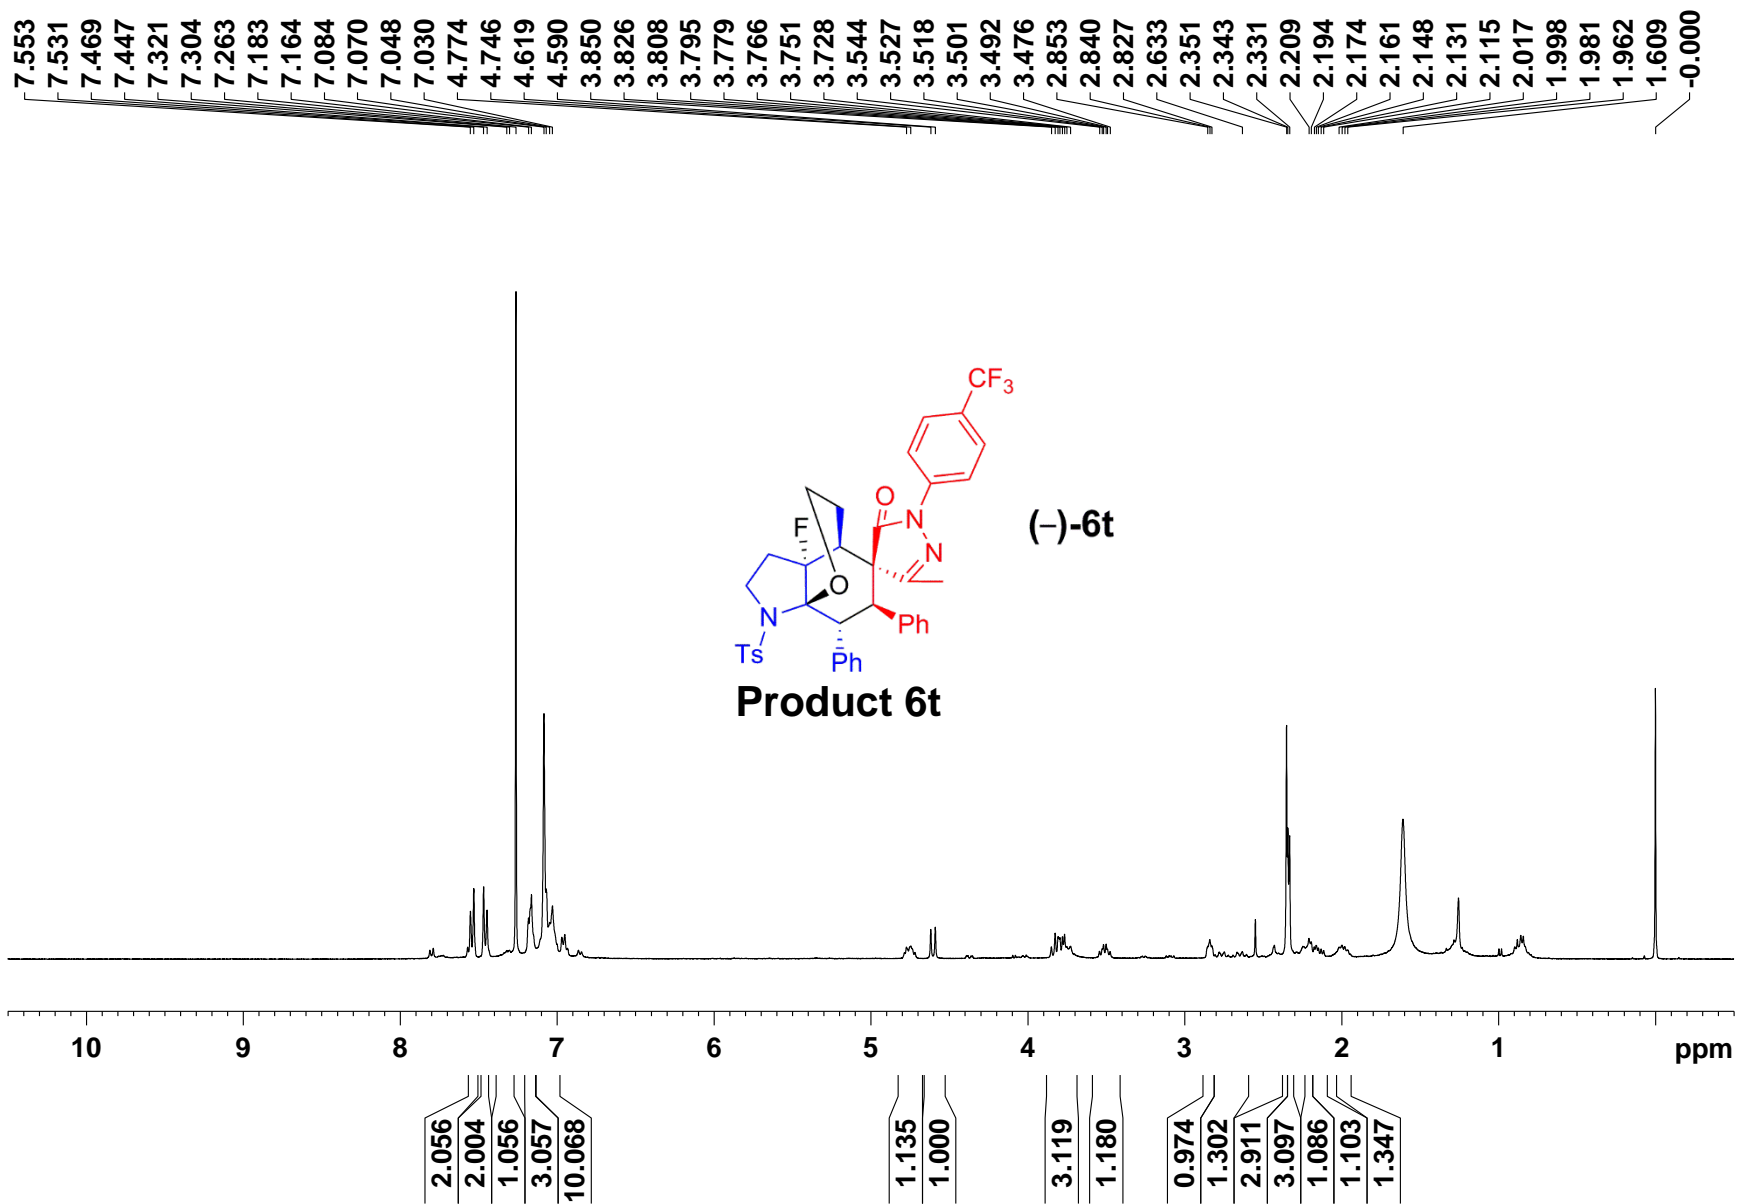

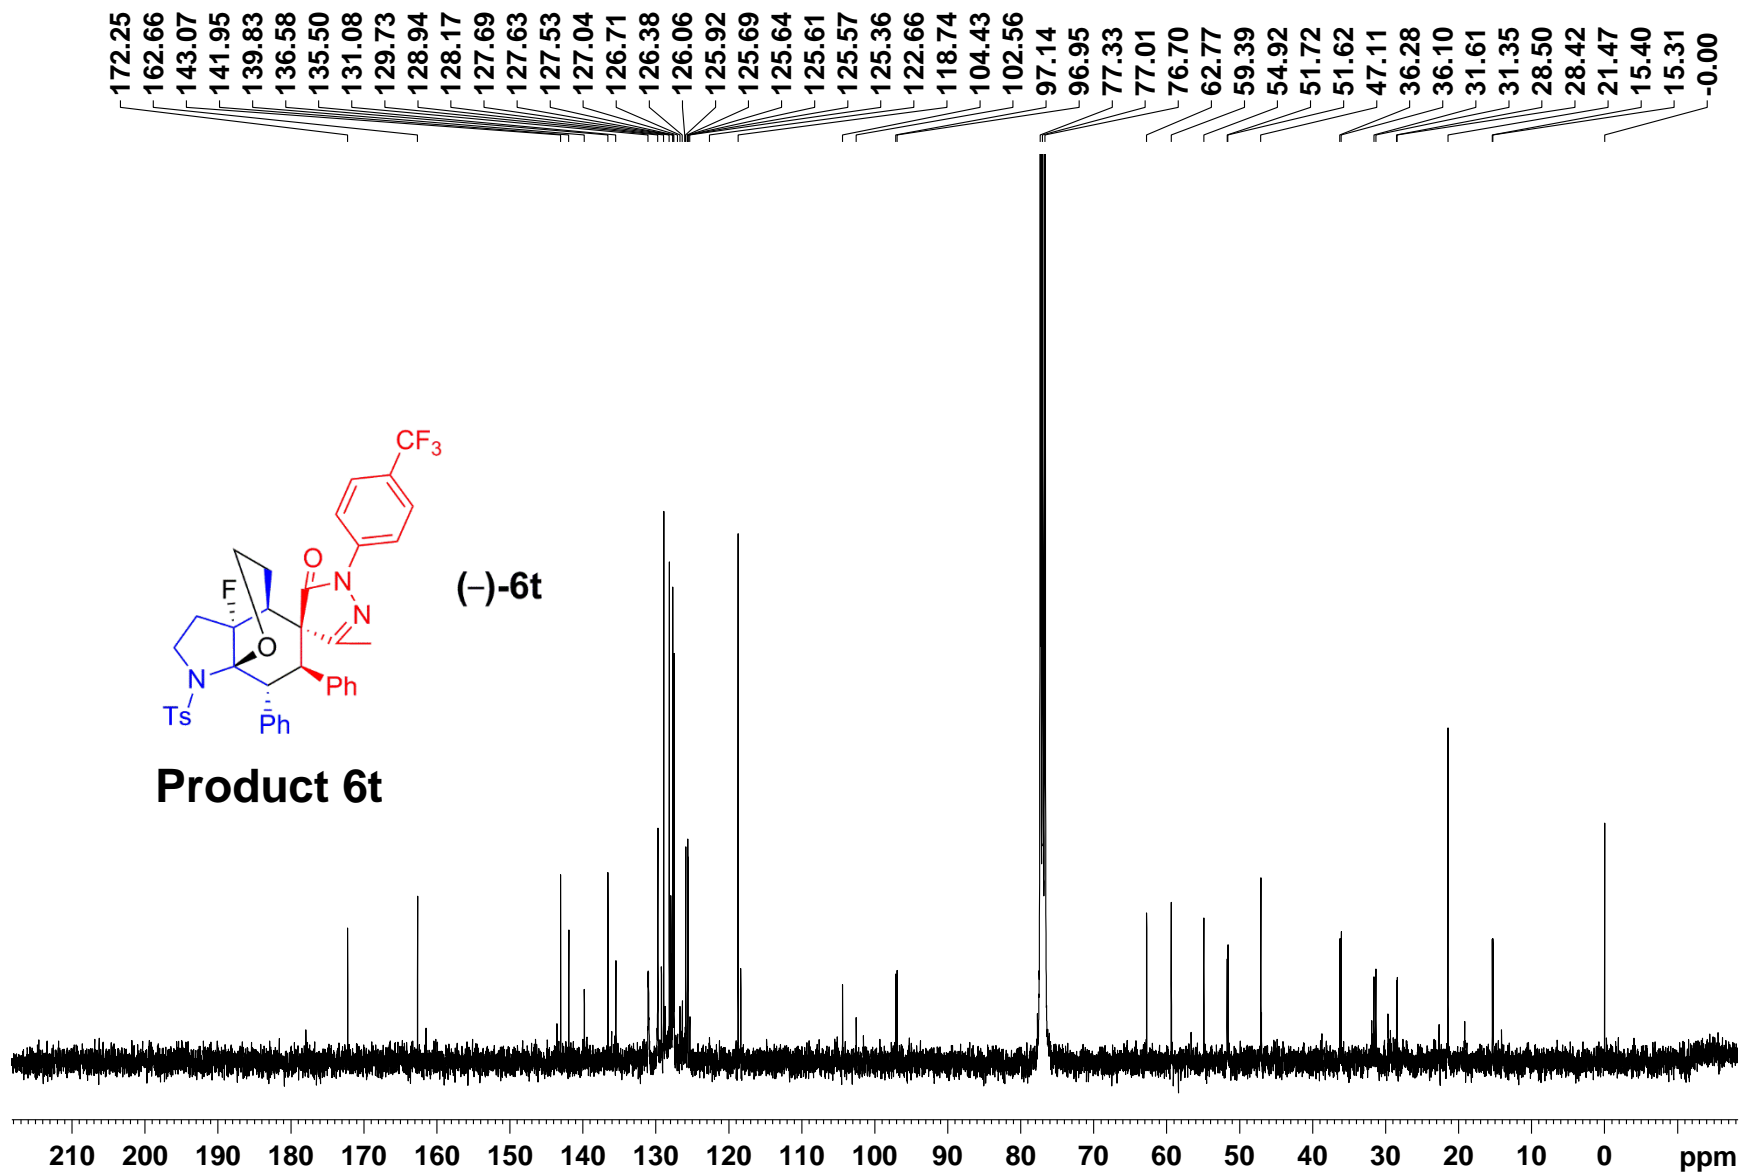

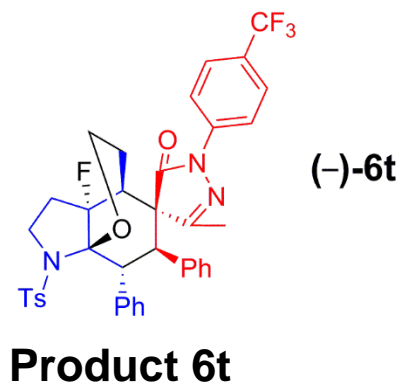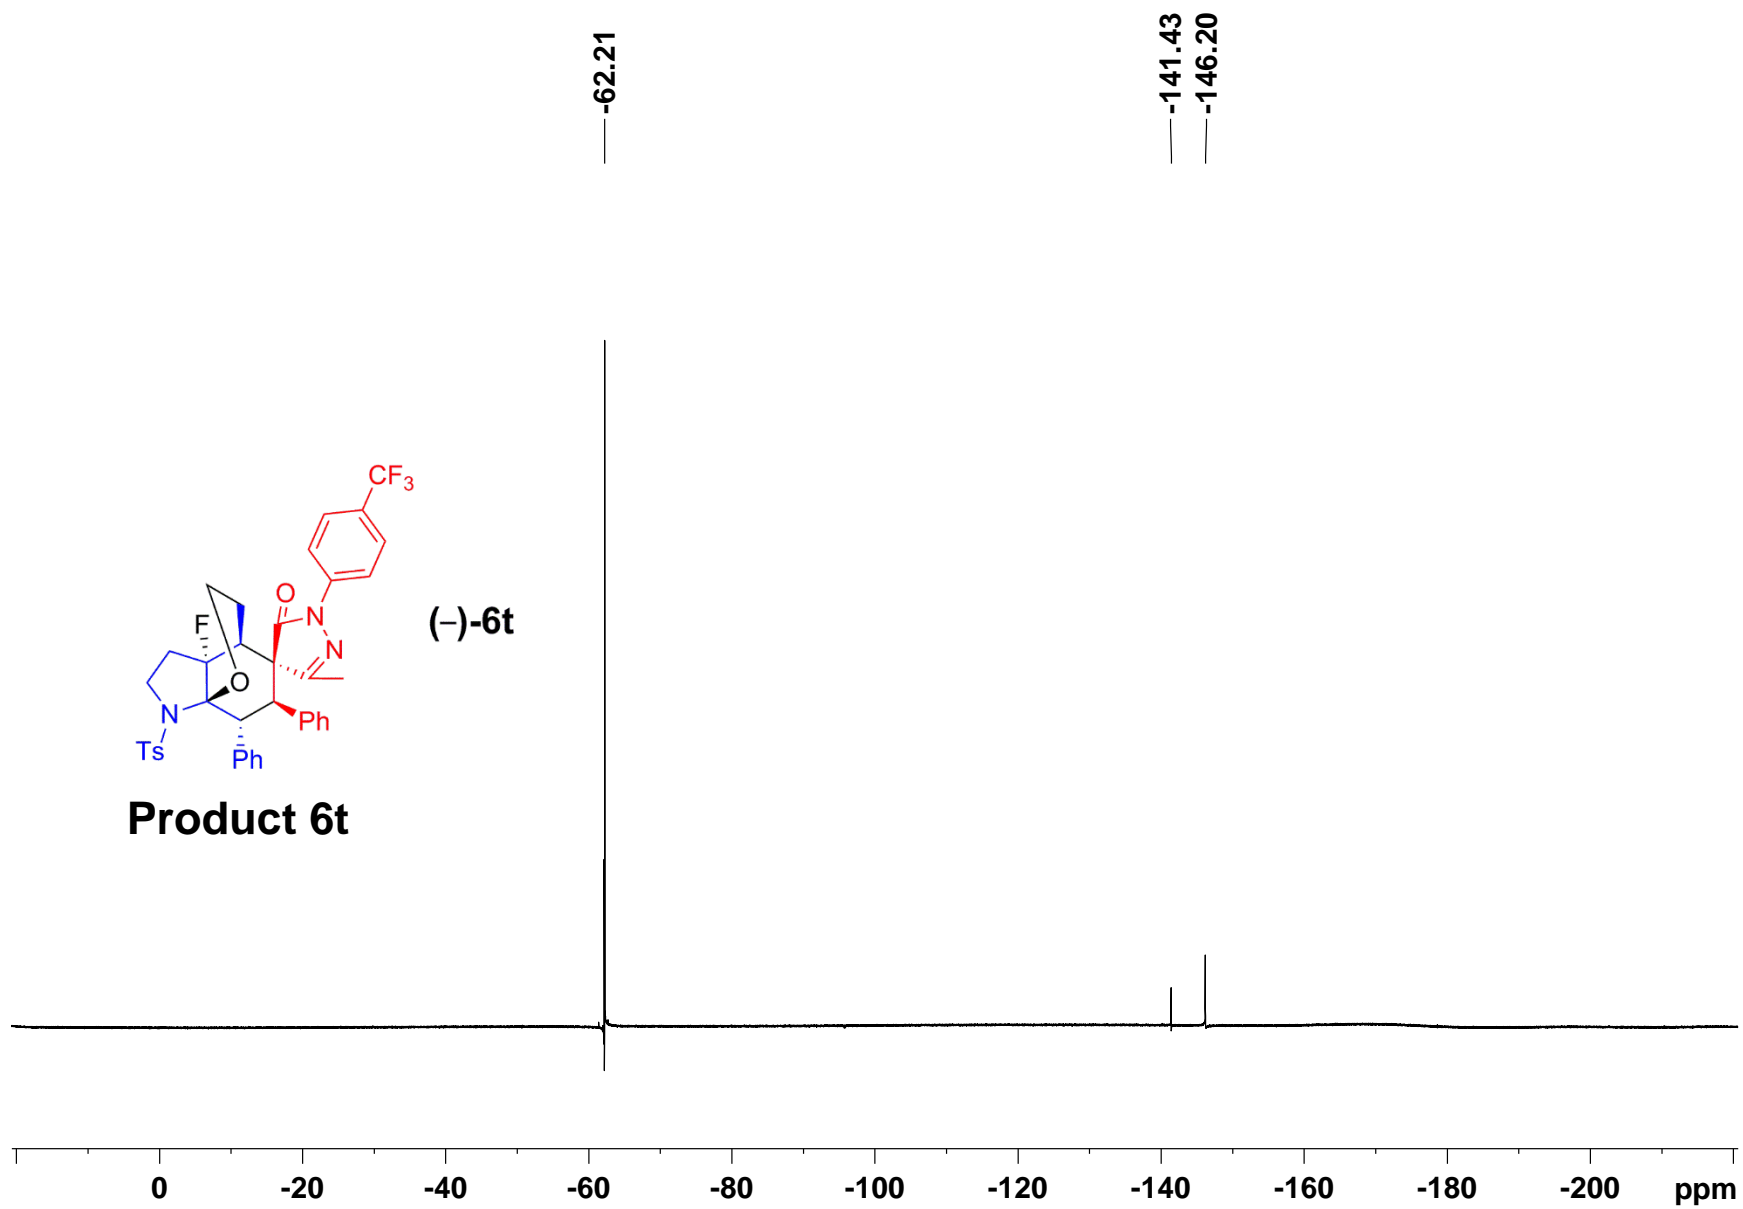

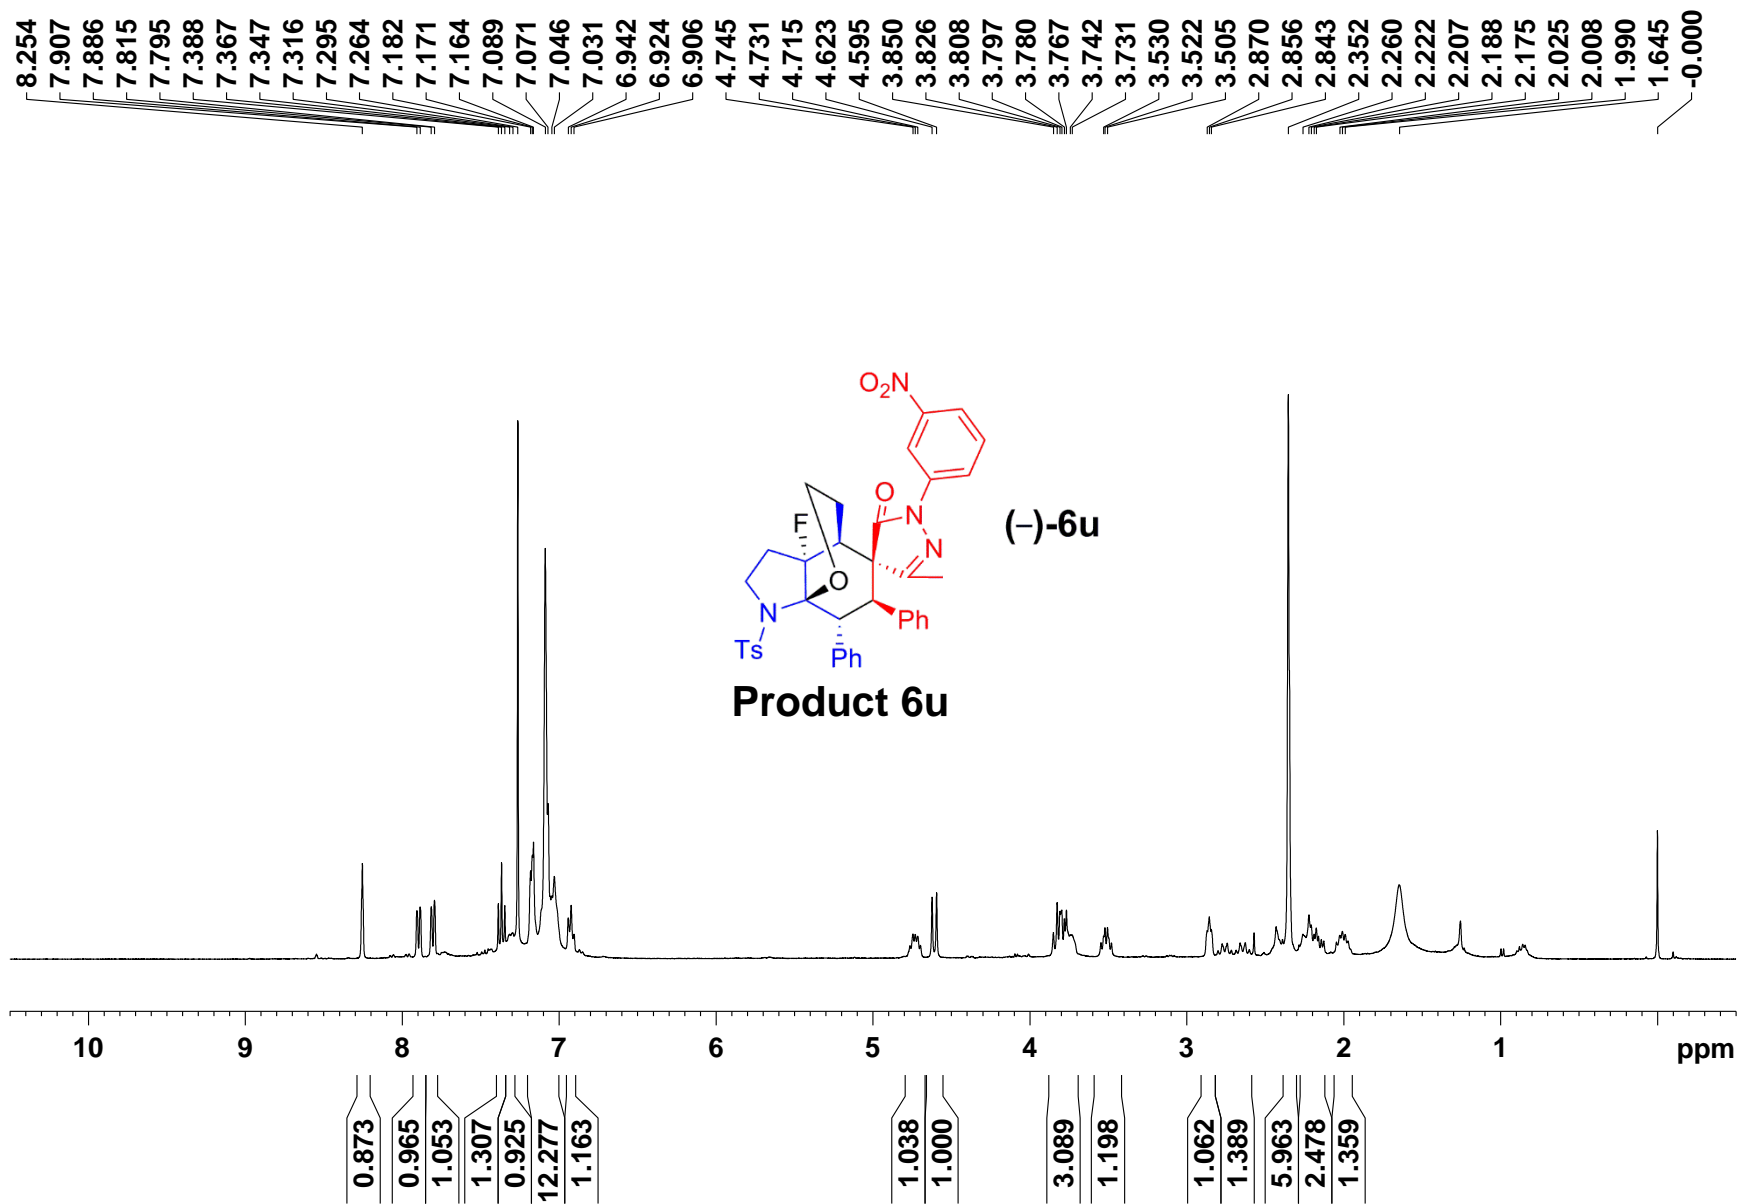



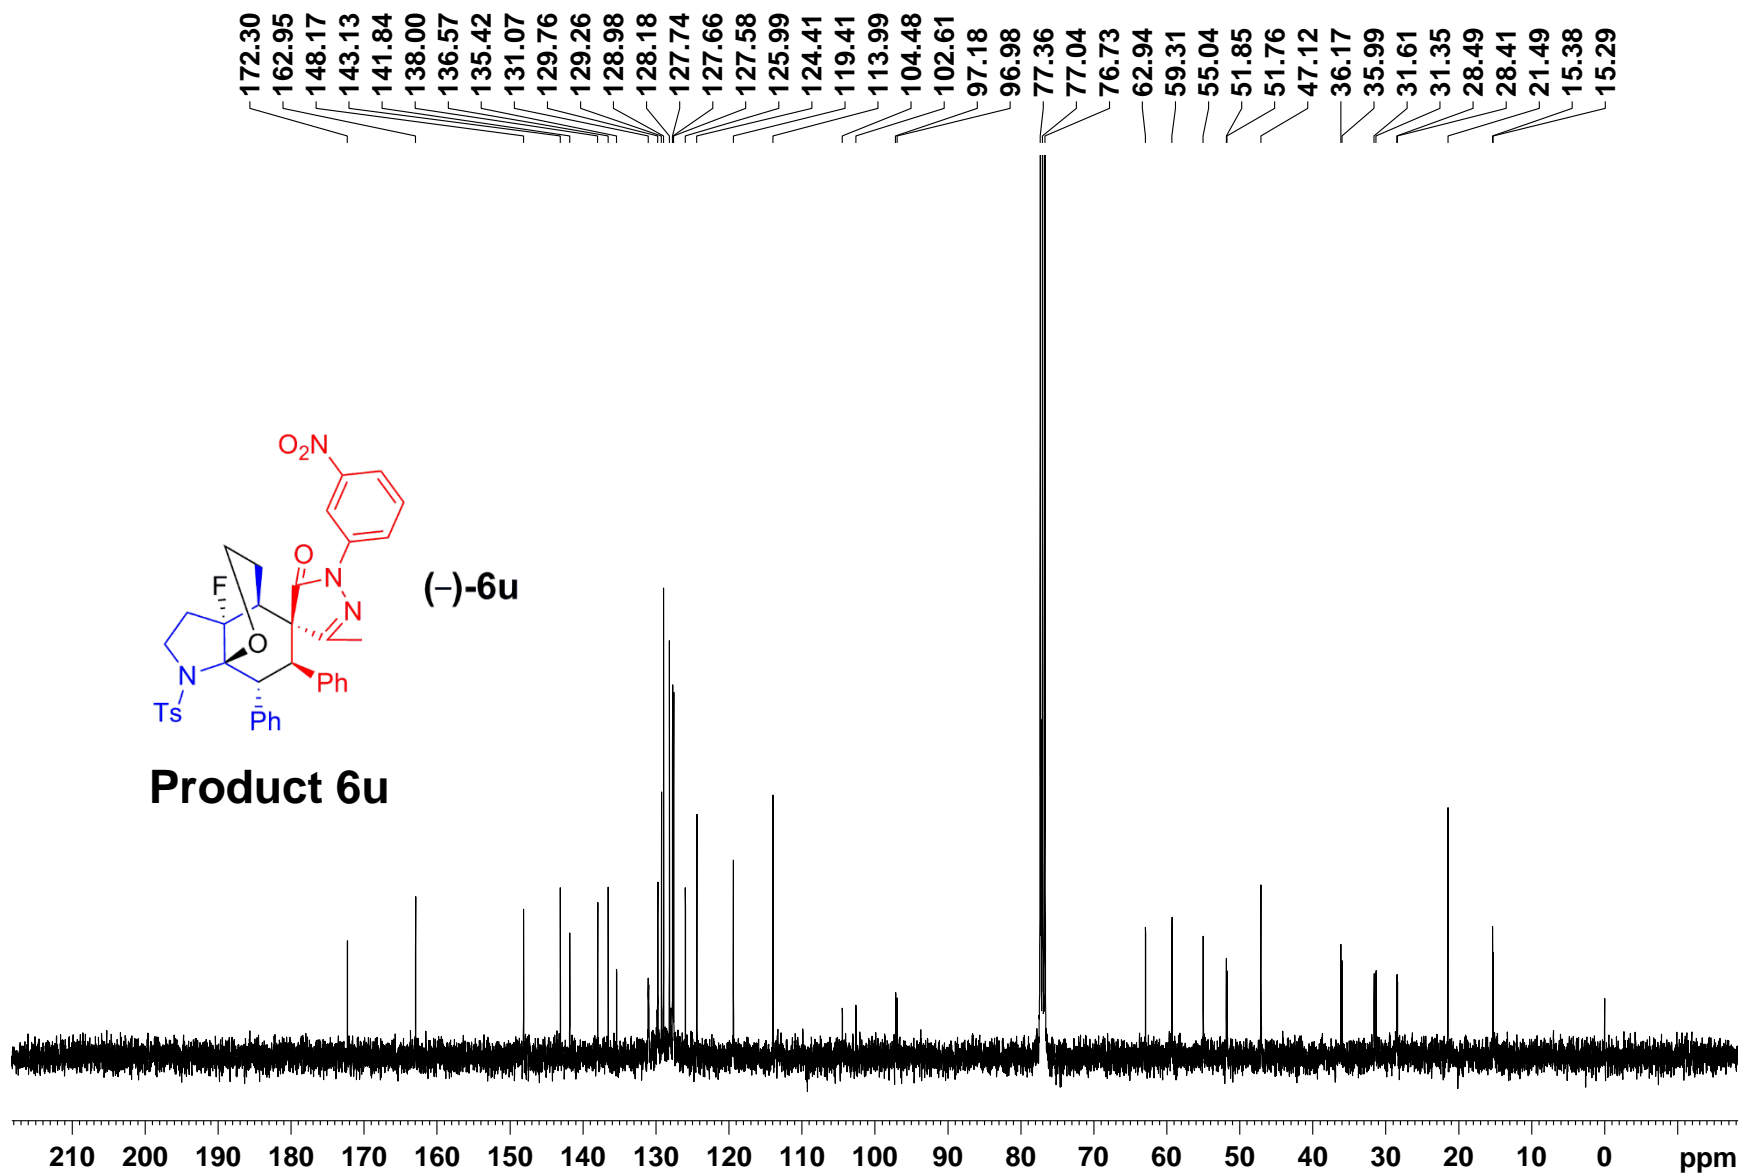

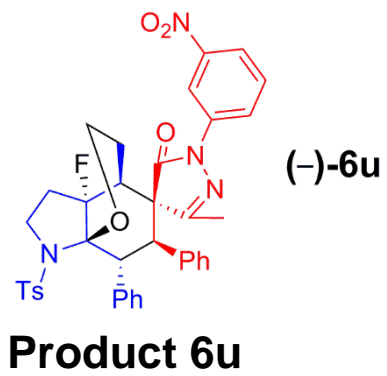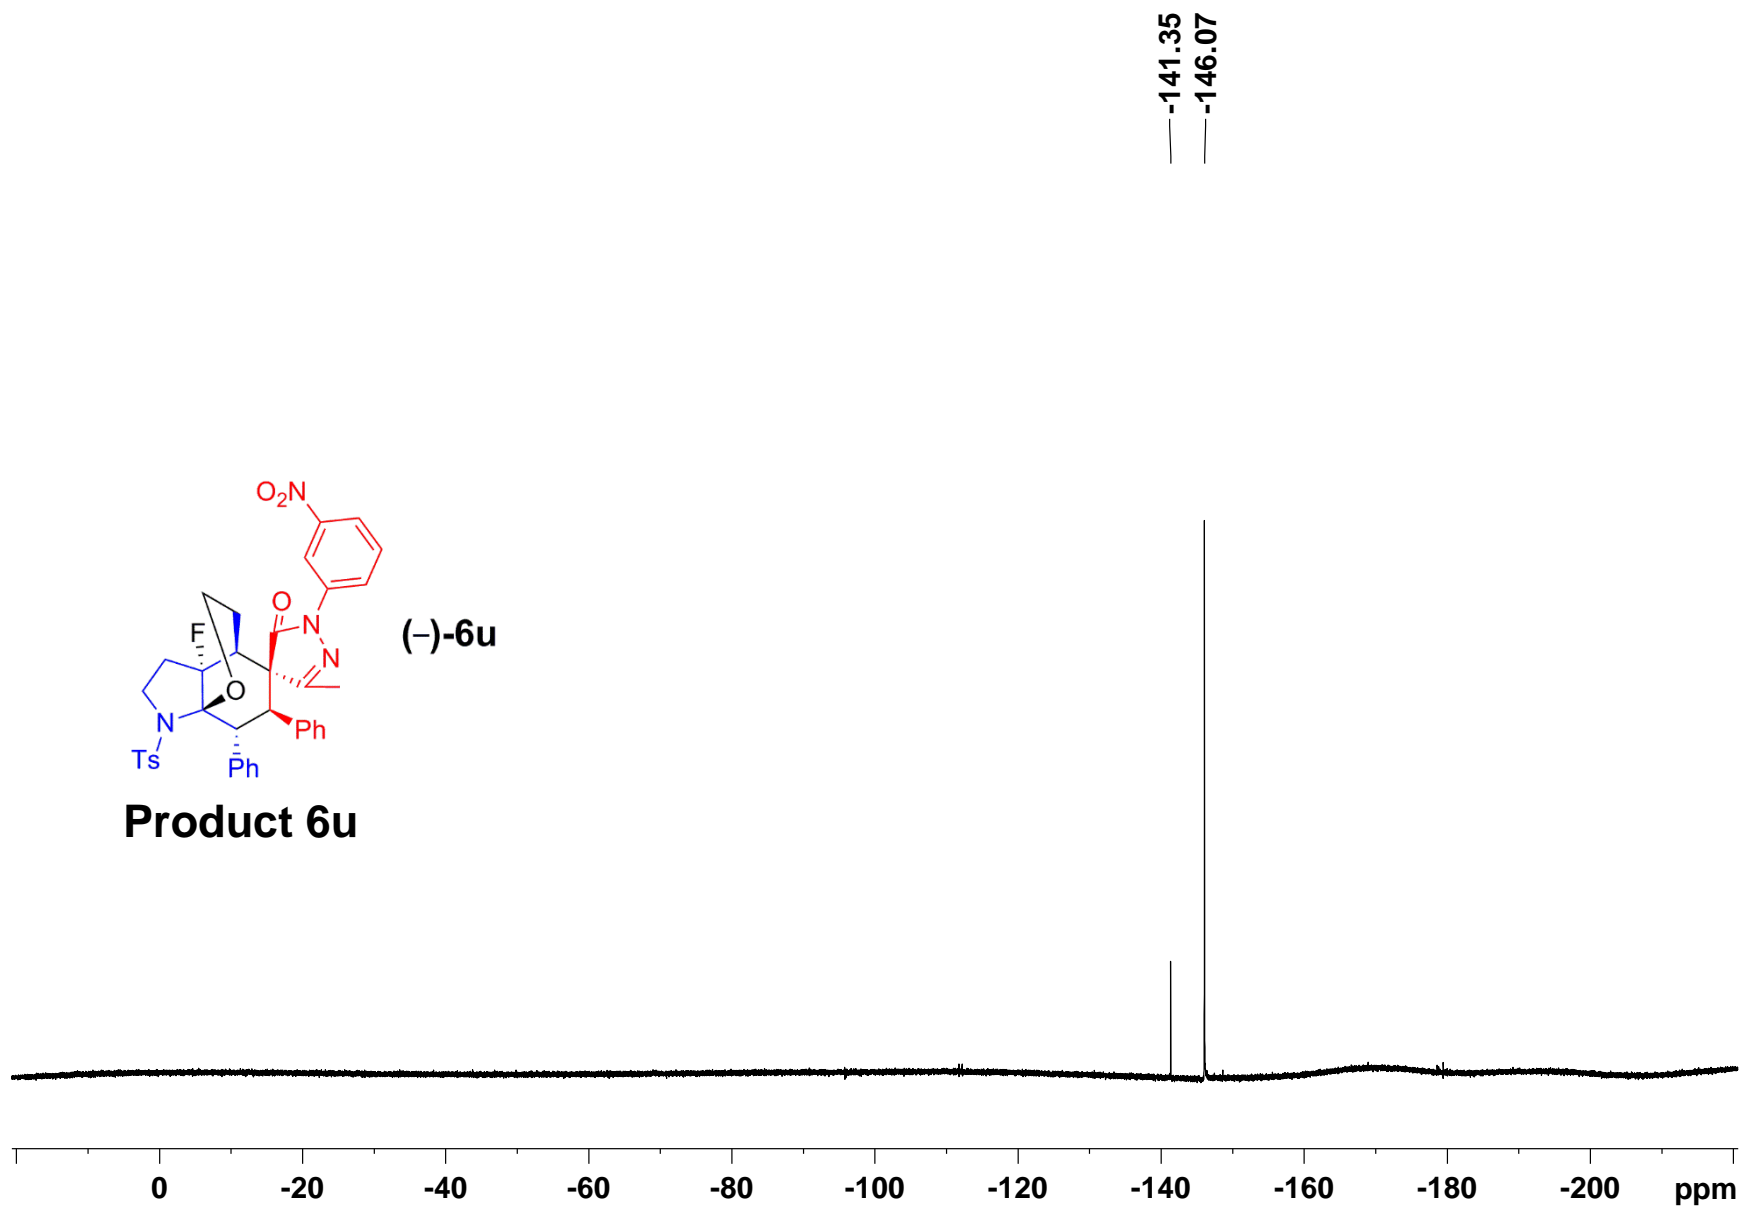

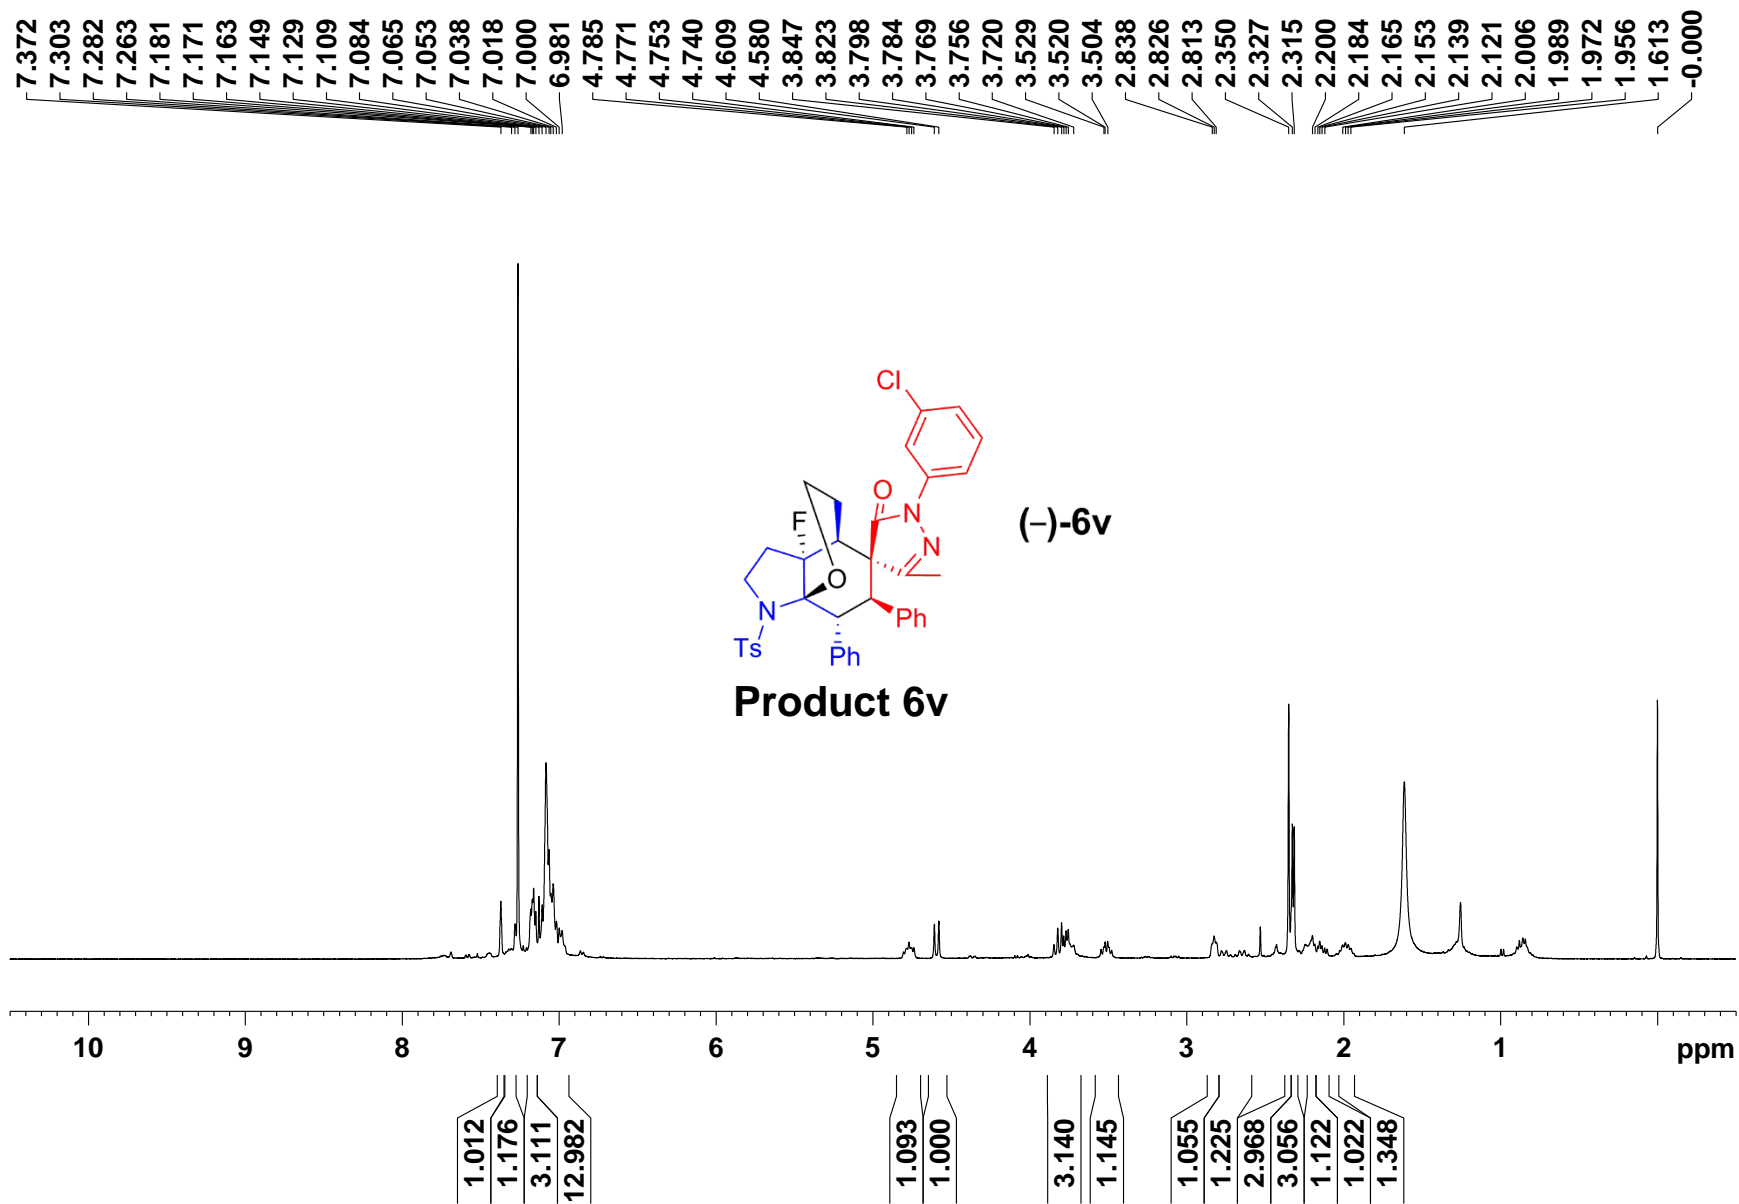

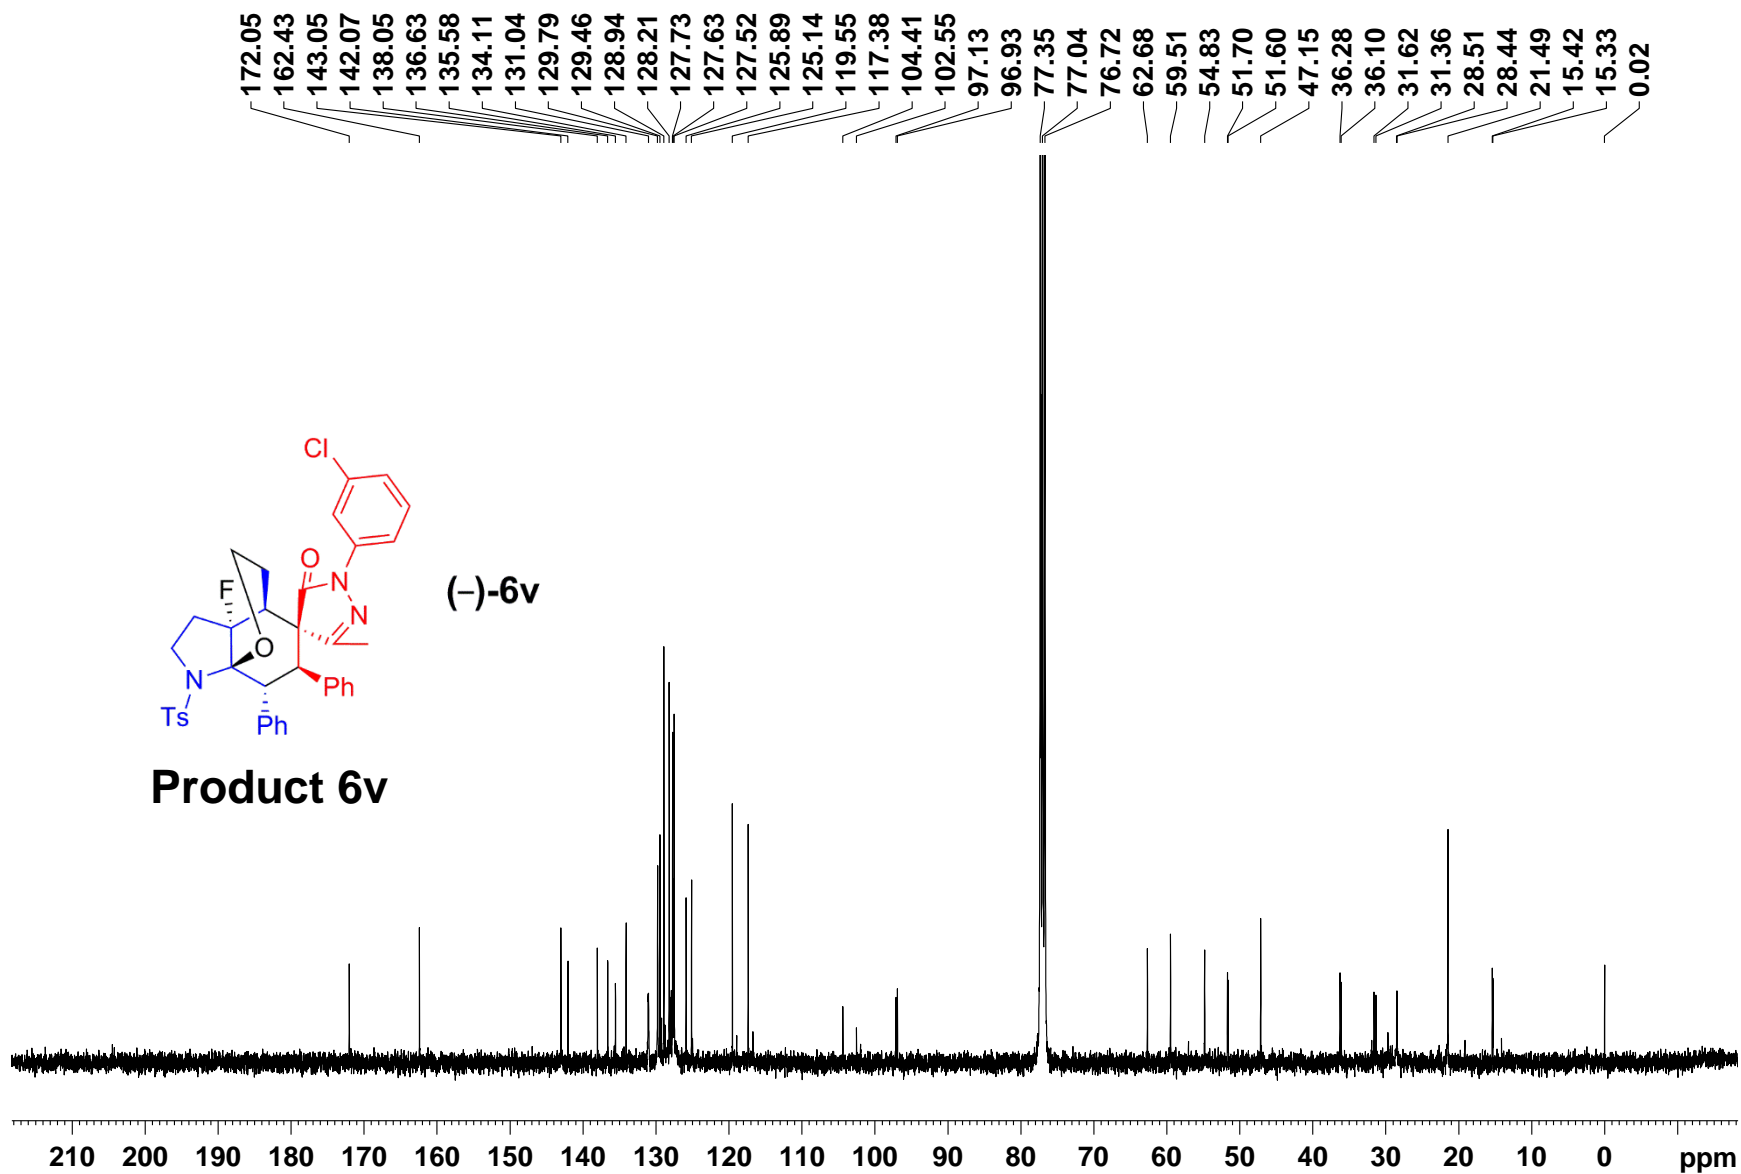

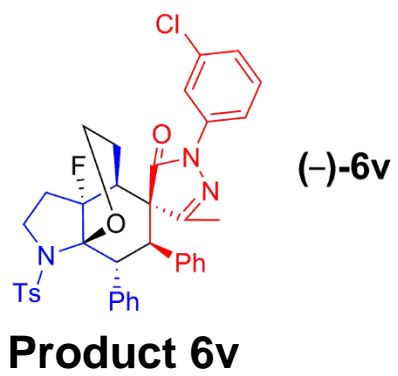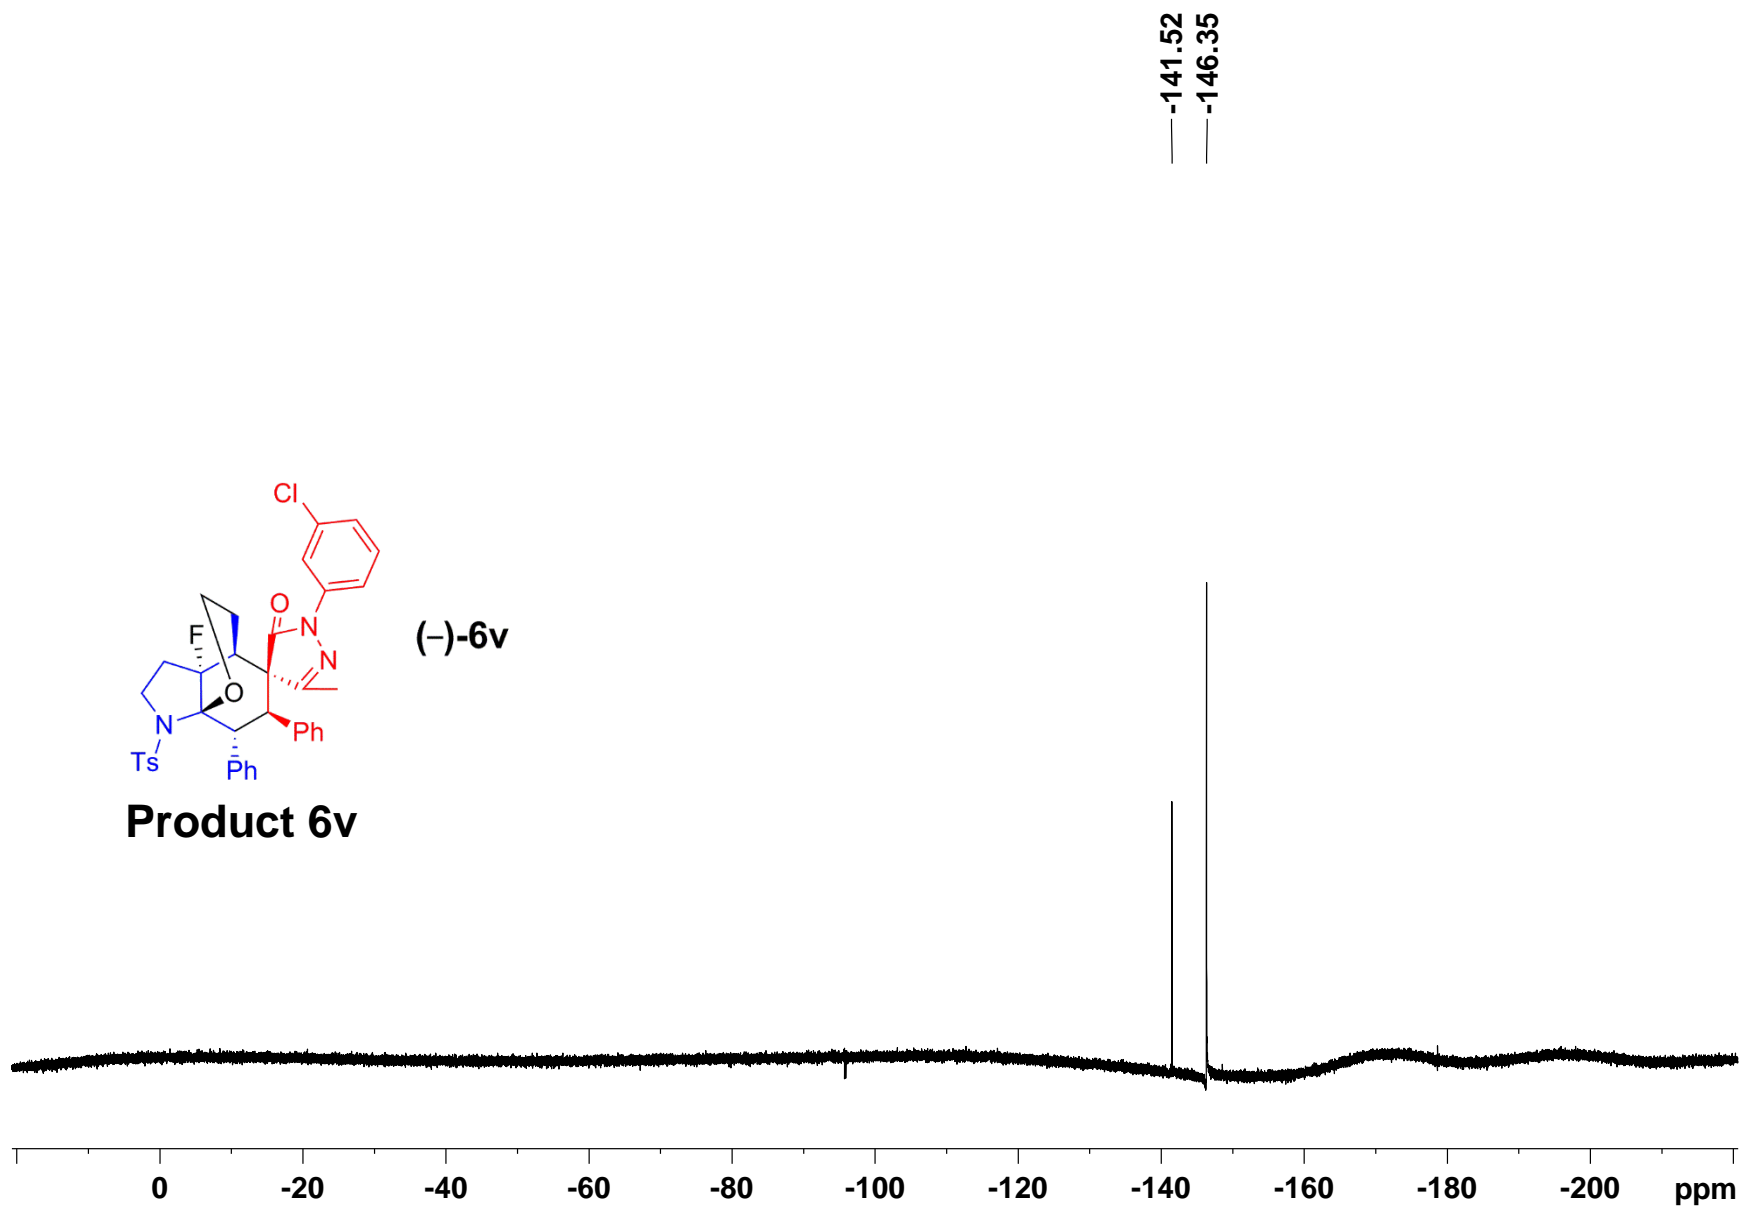

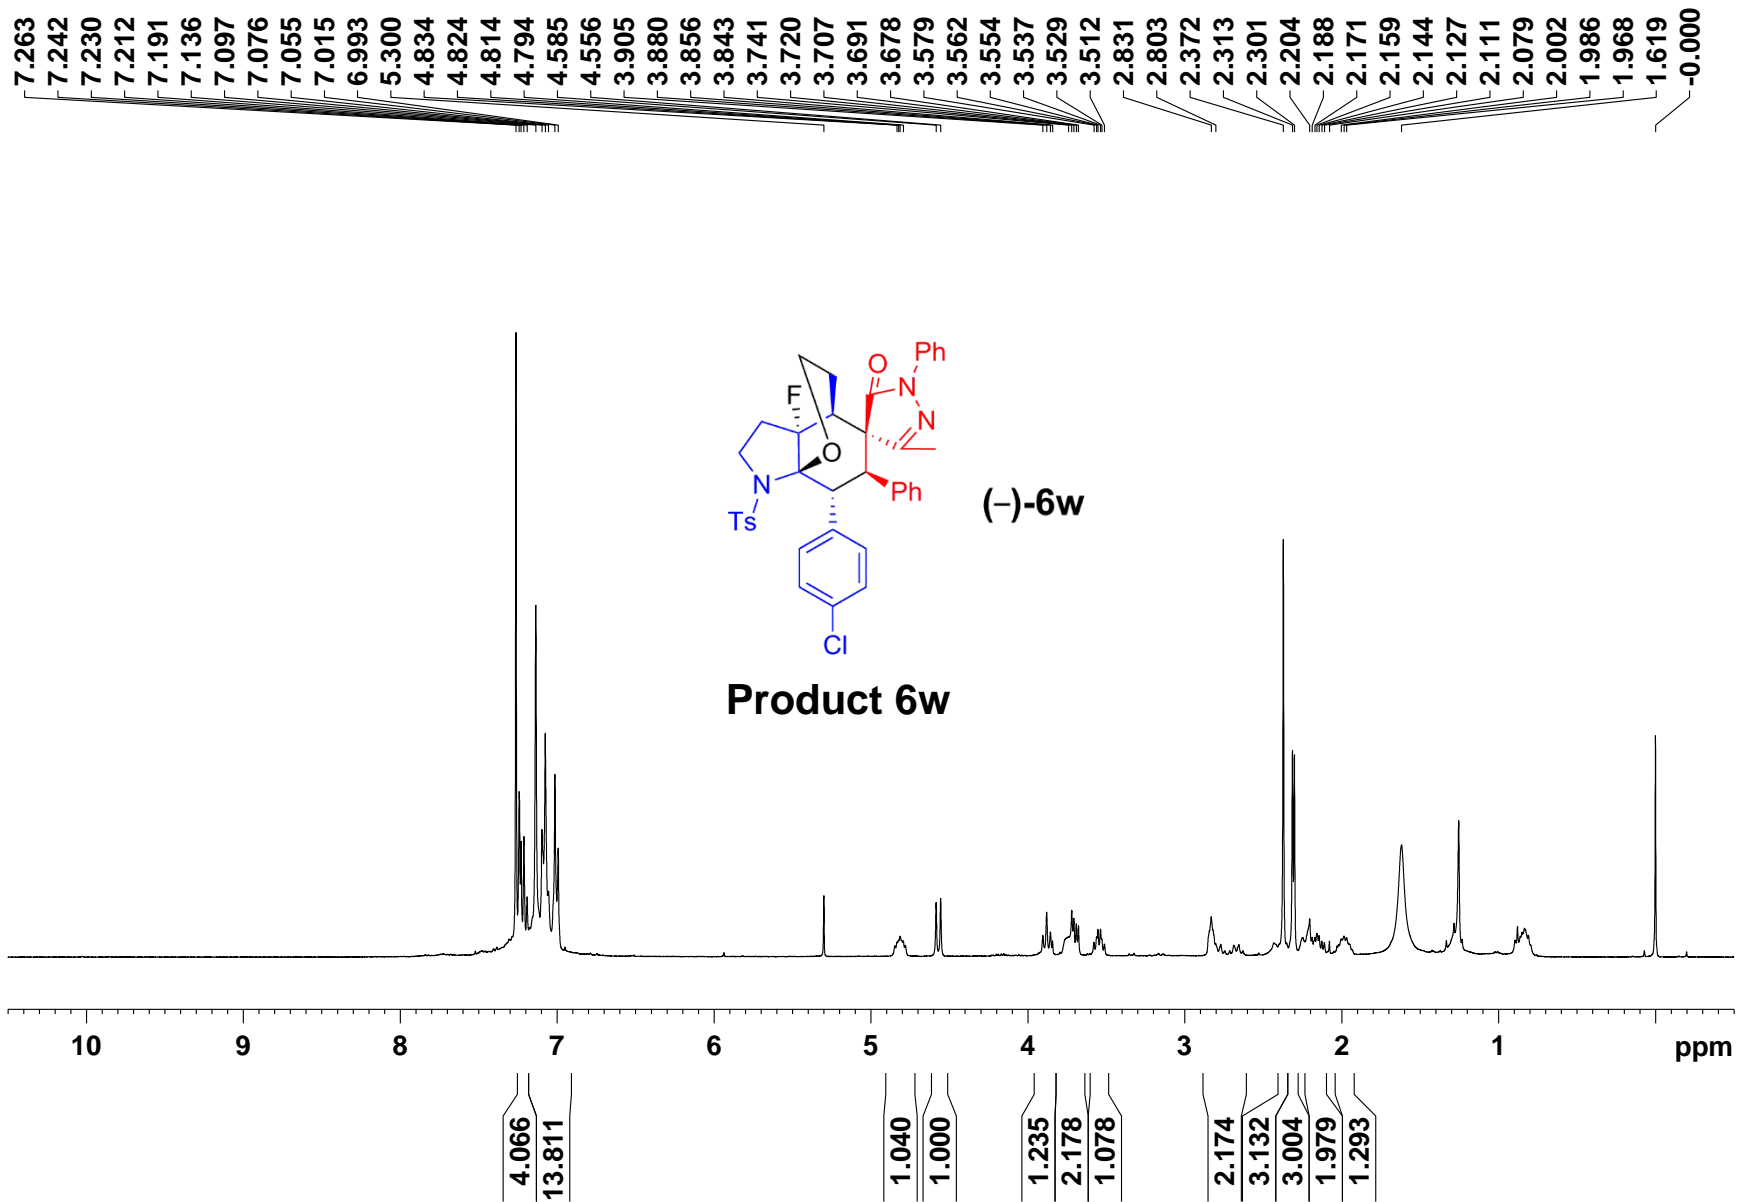

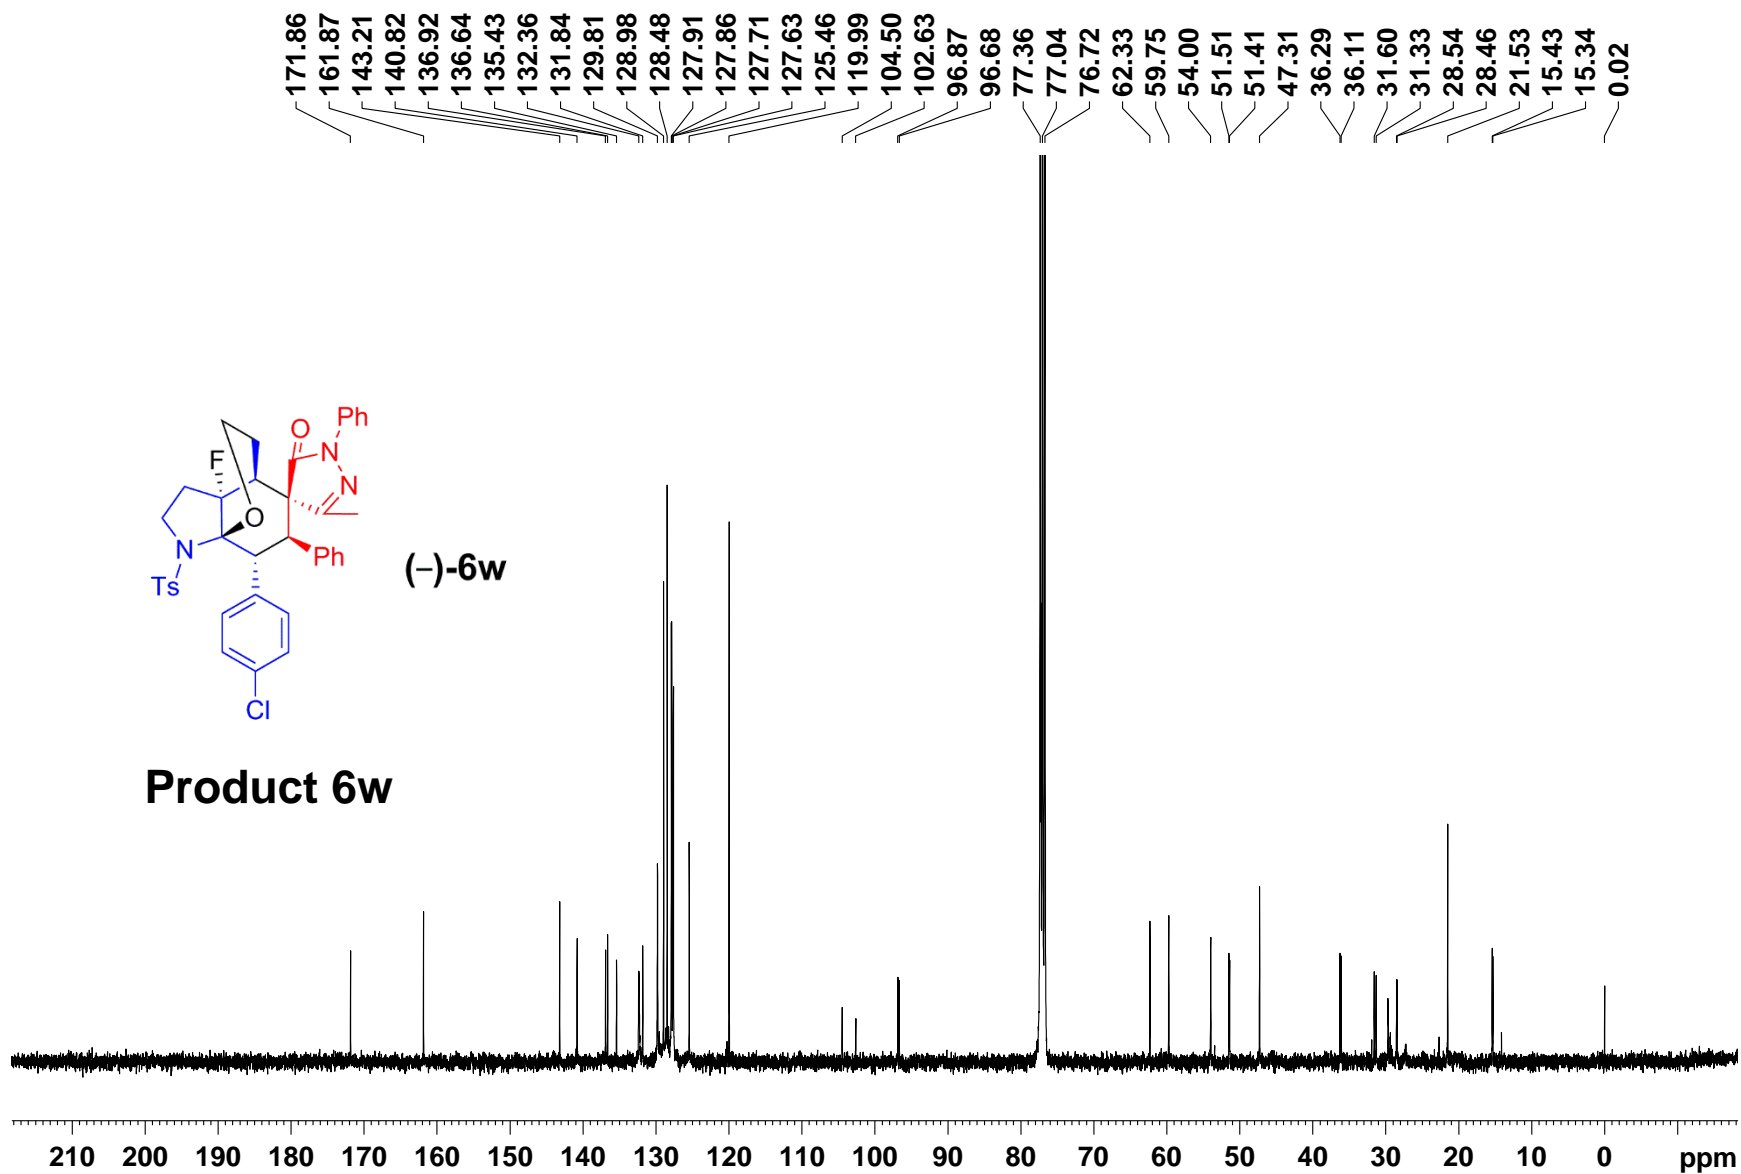

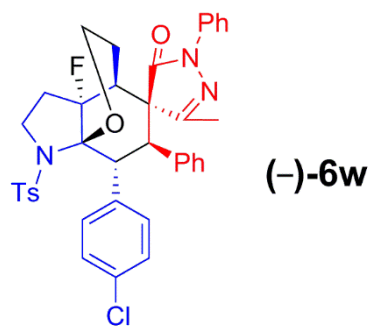

(-)-6w

Product 6w

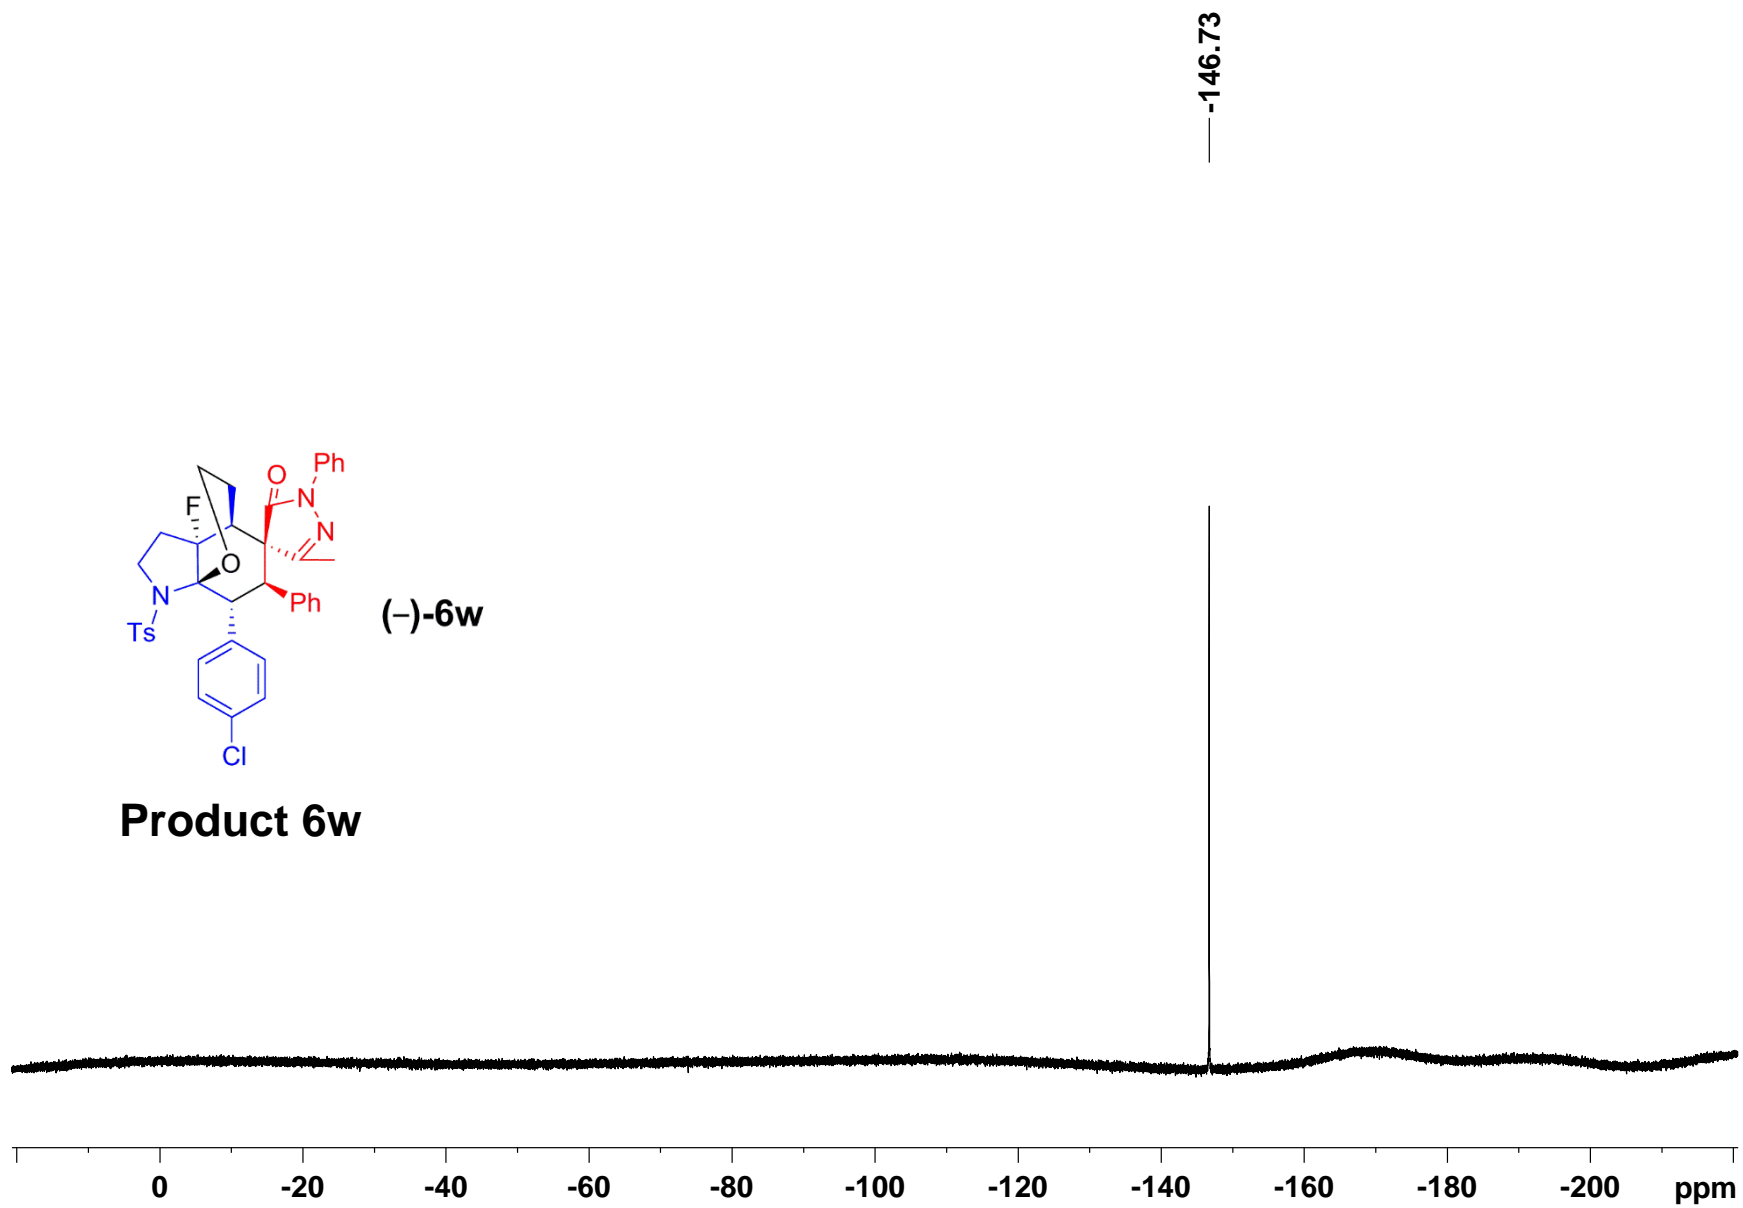



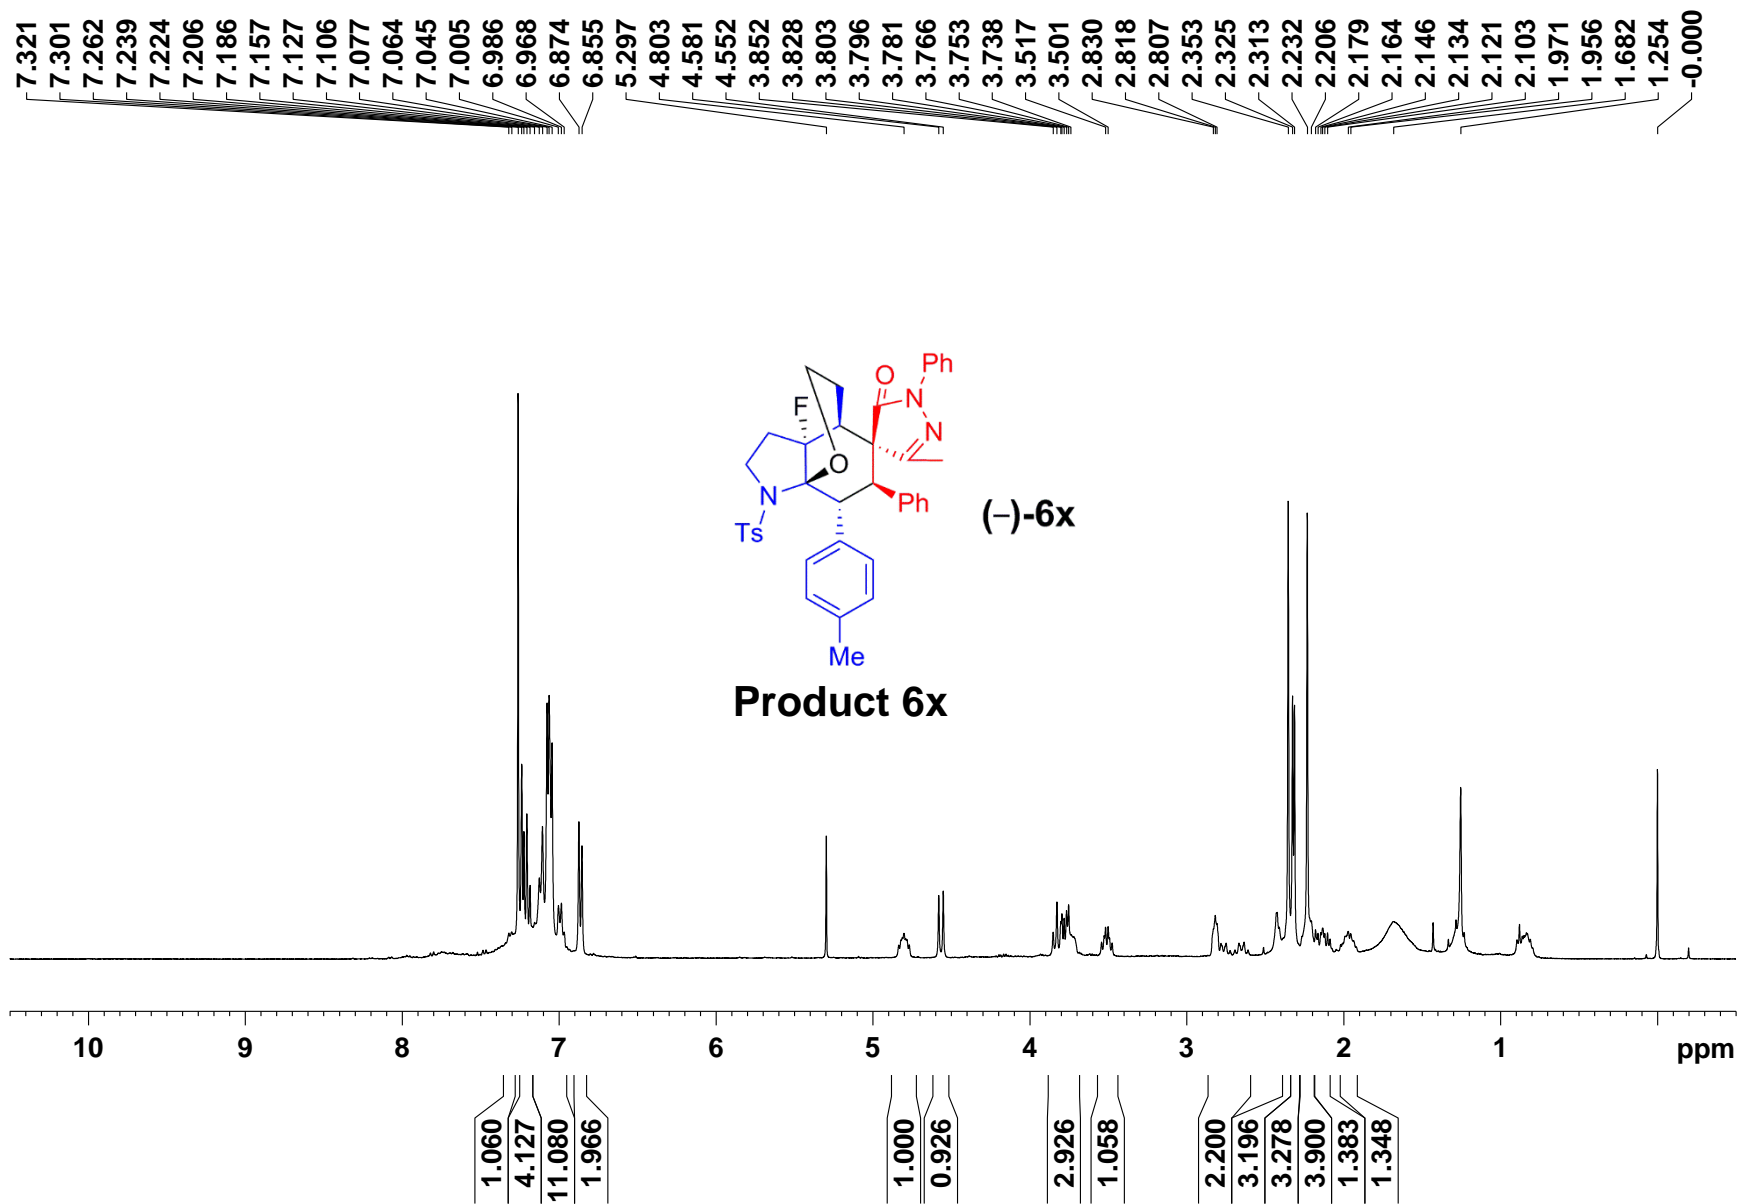

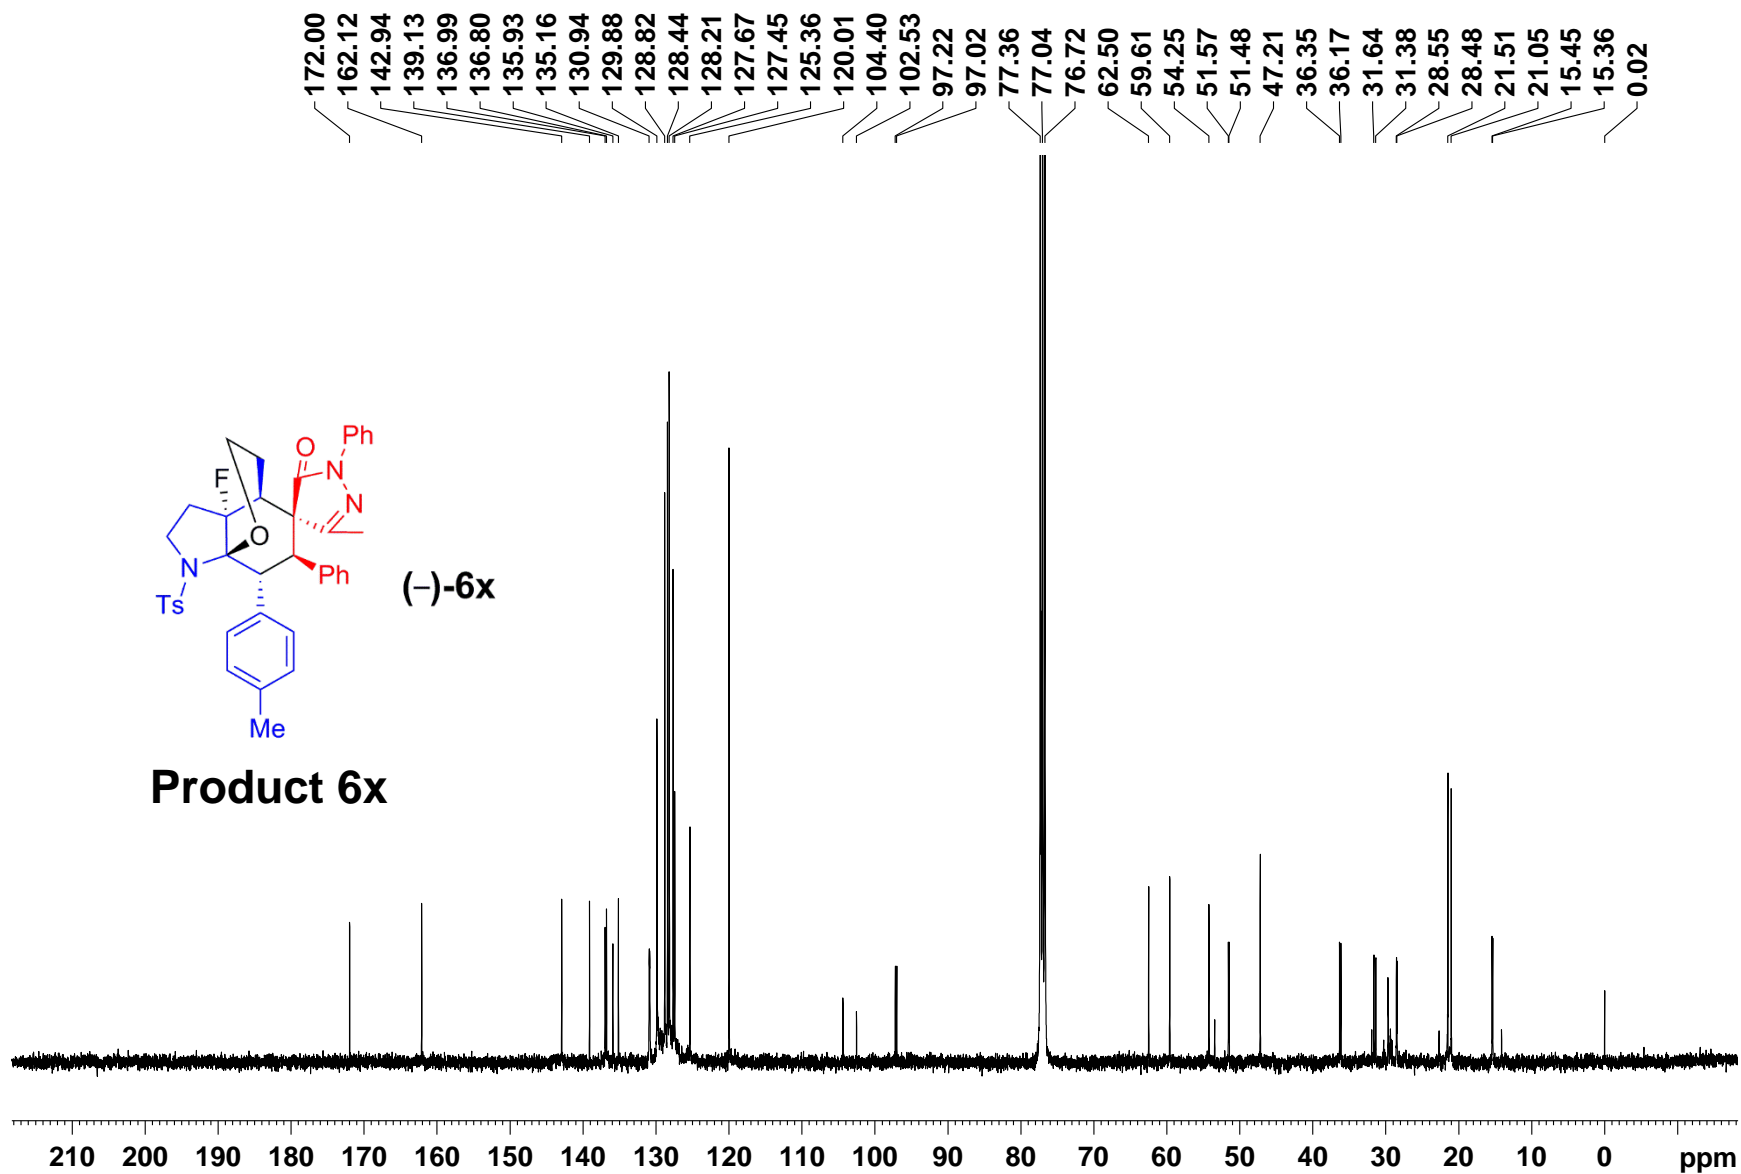

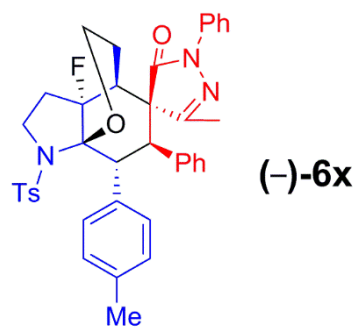

Product 6x

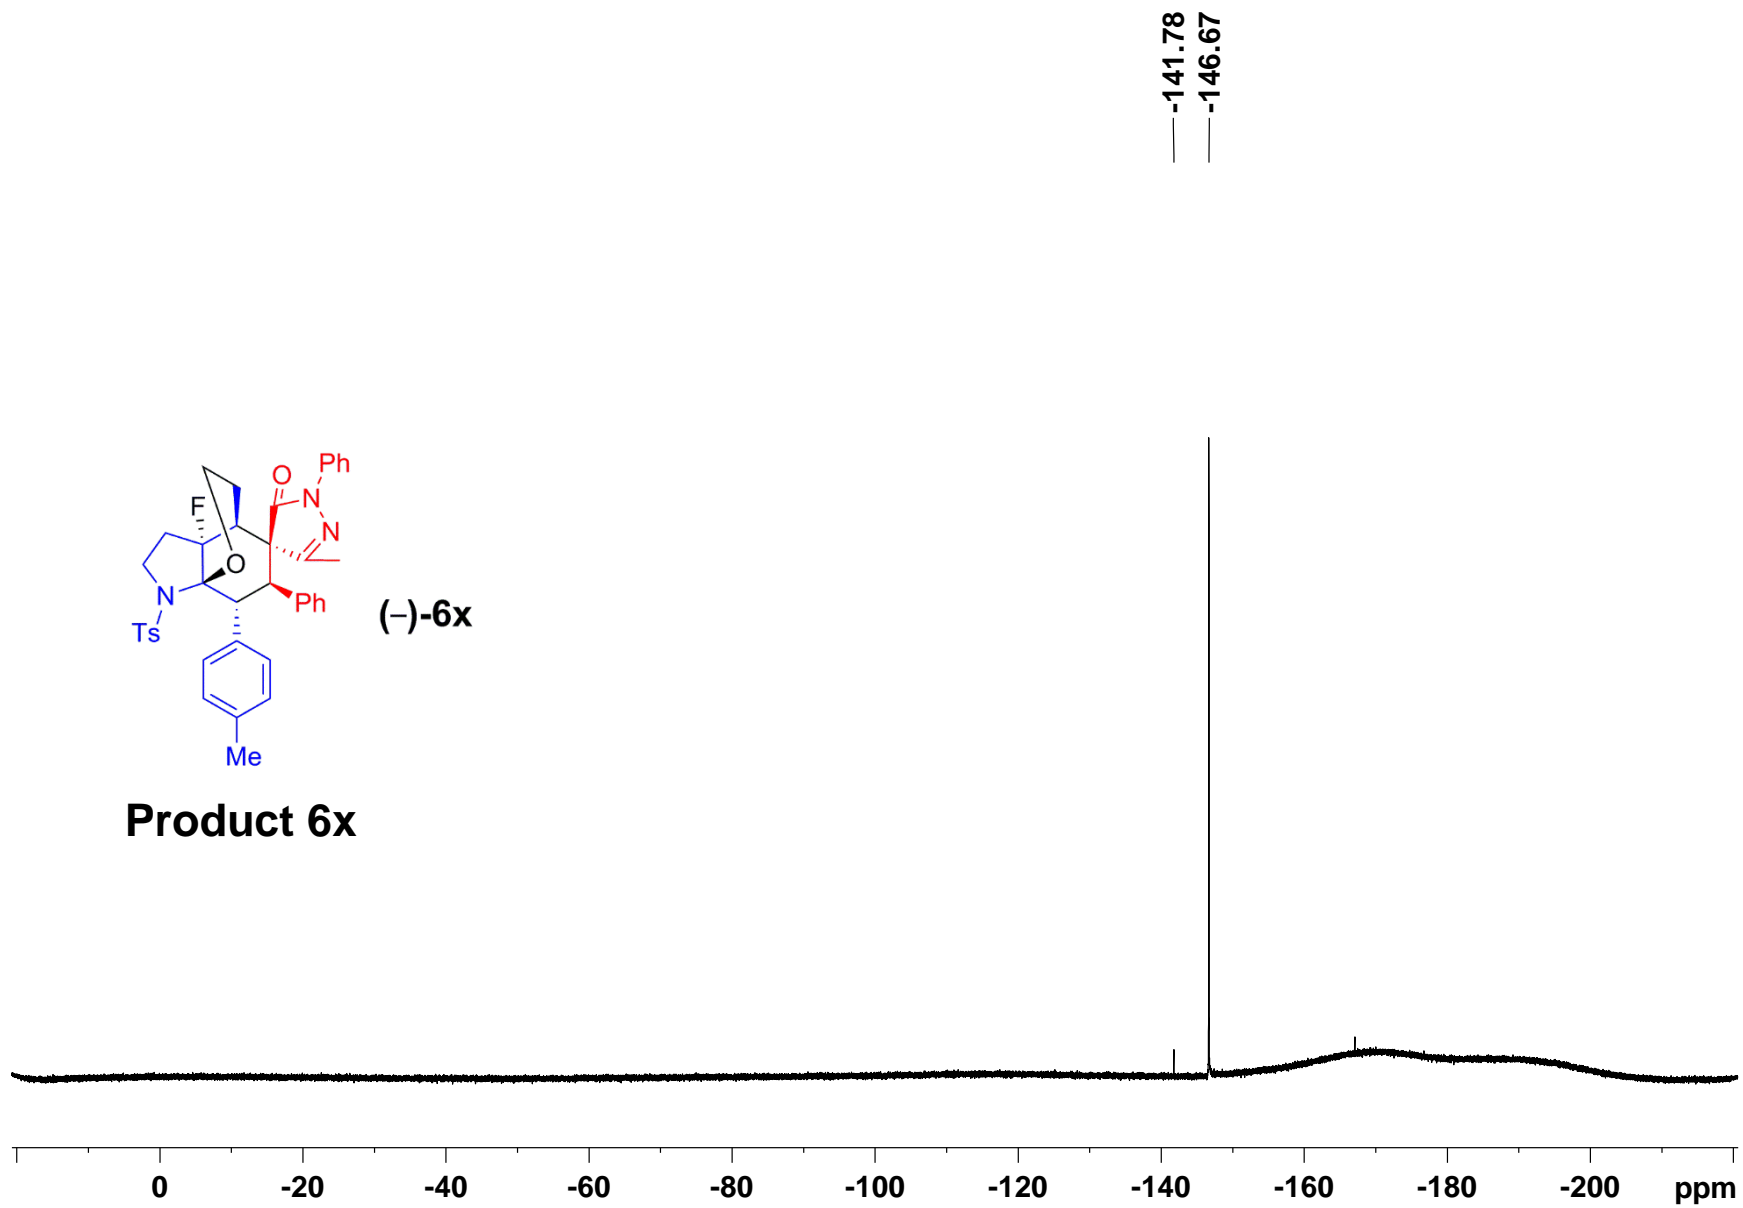

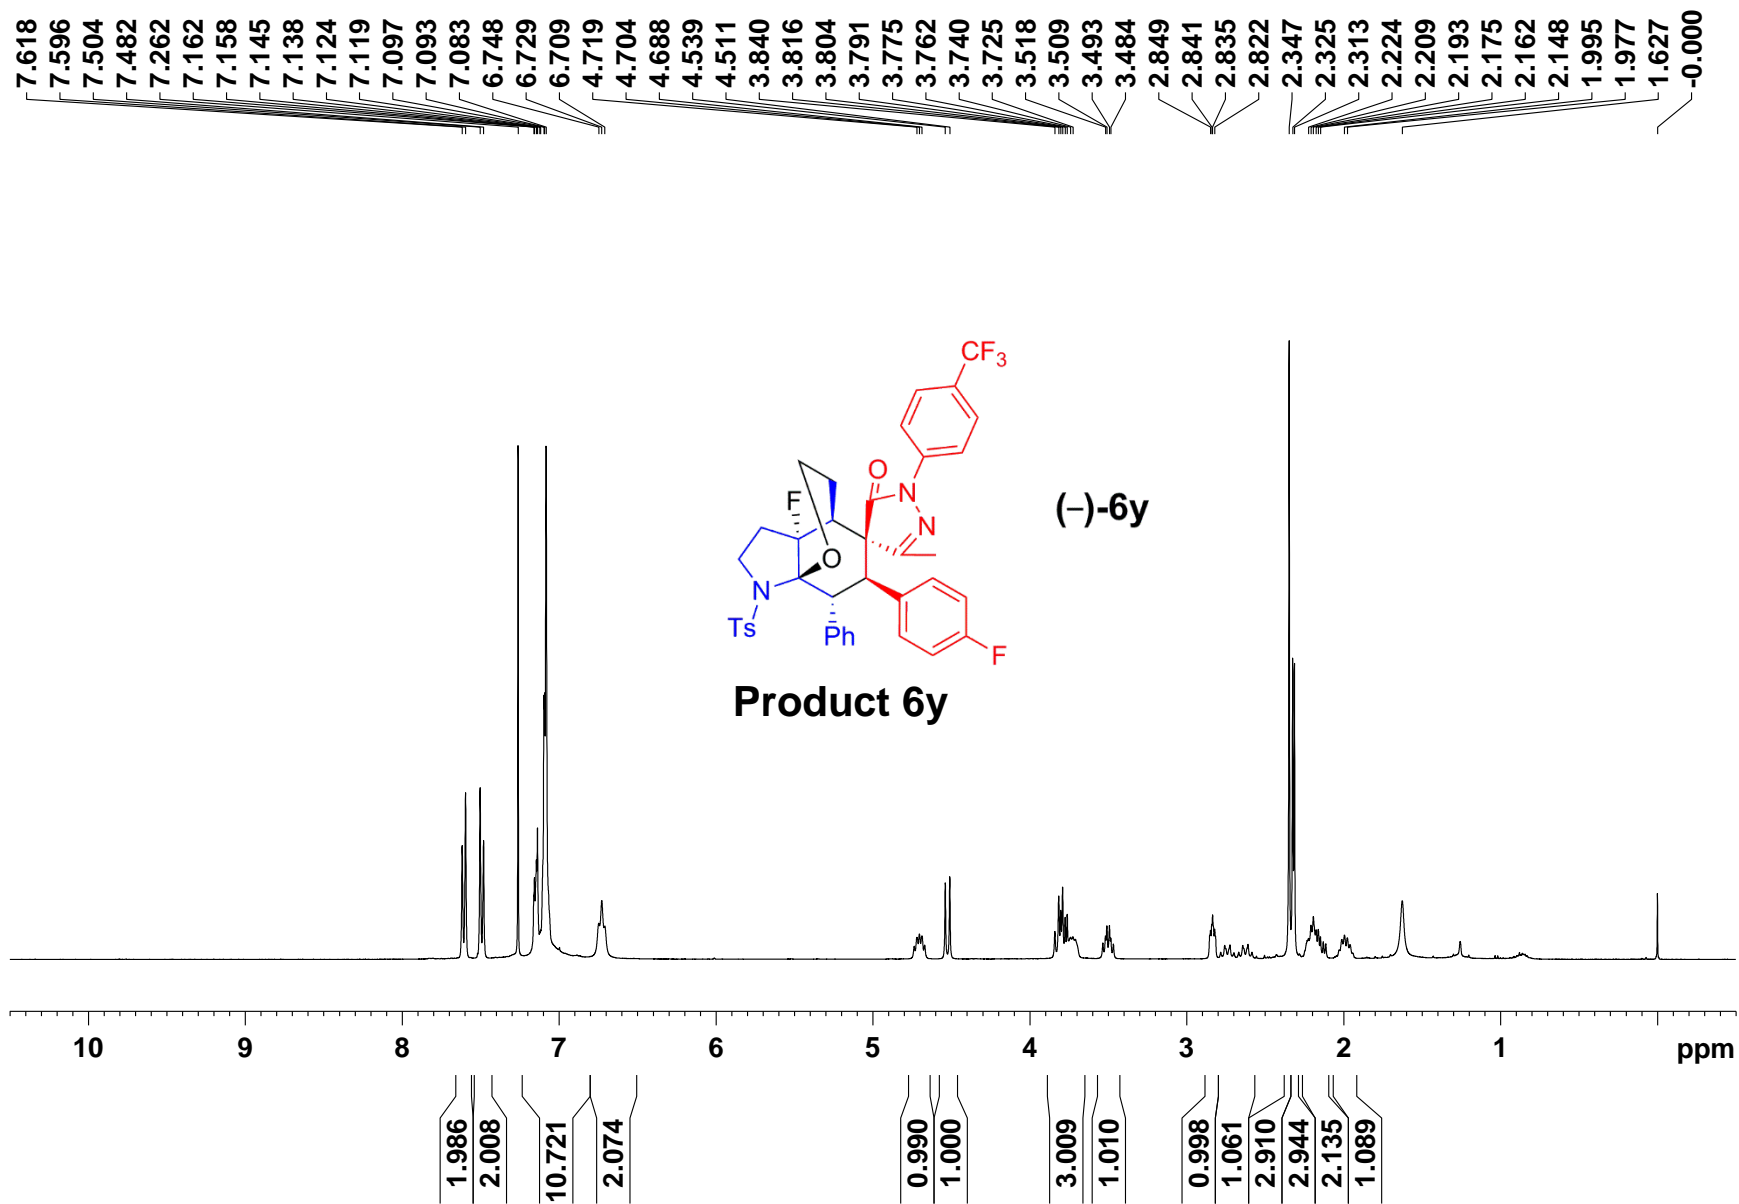

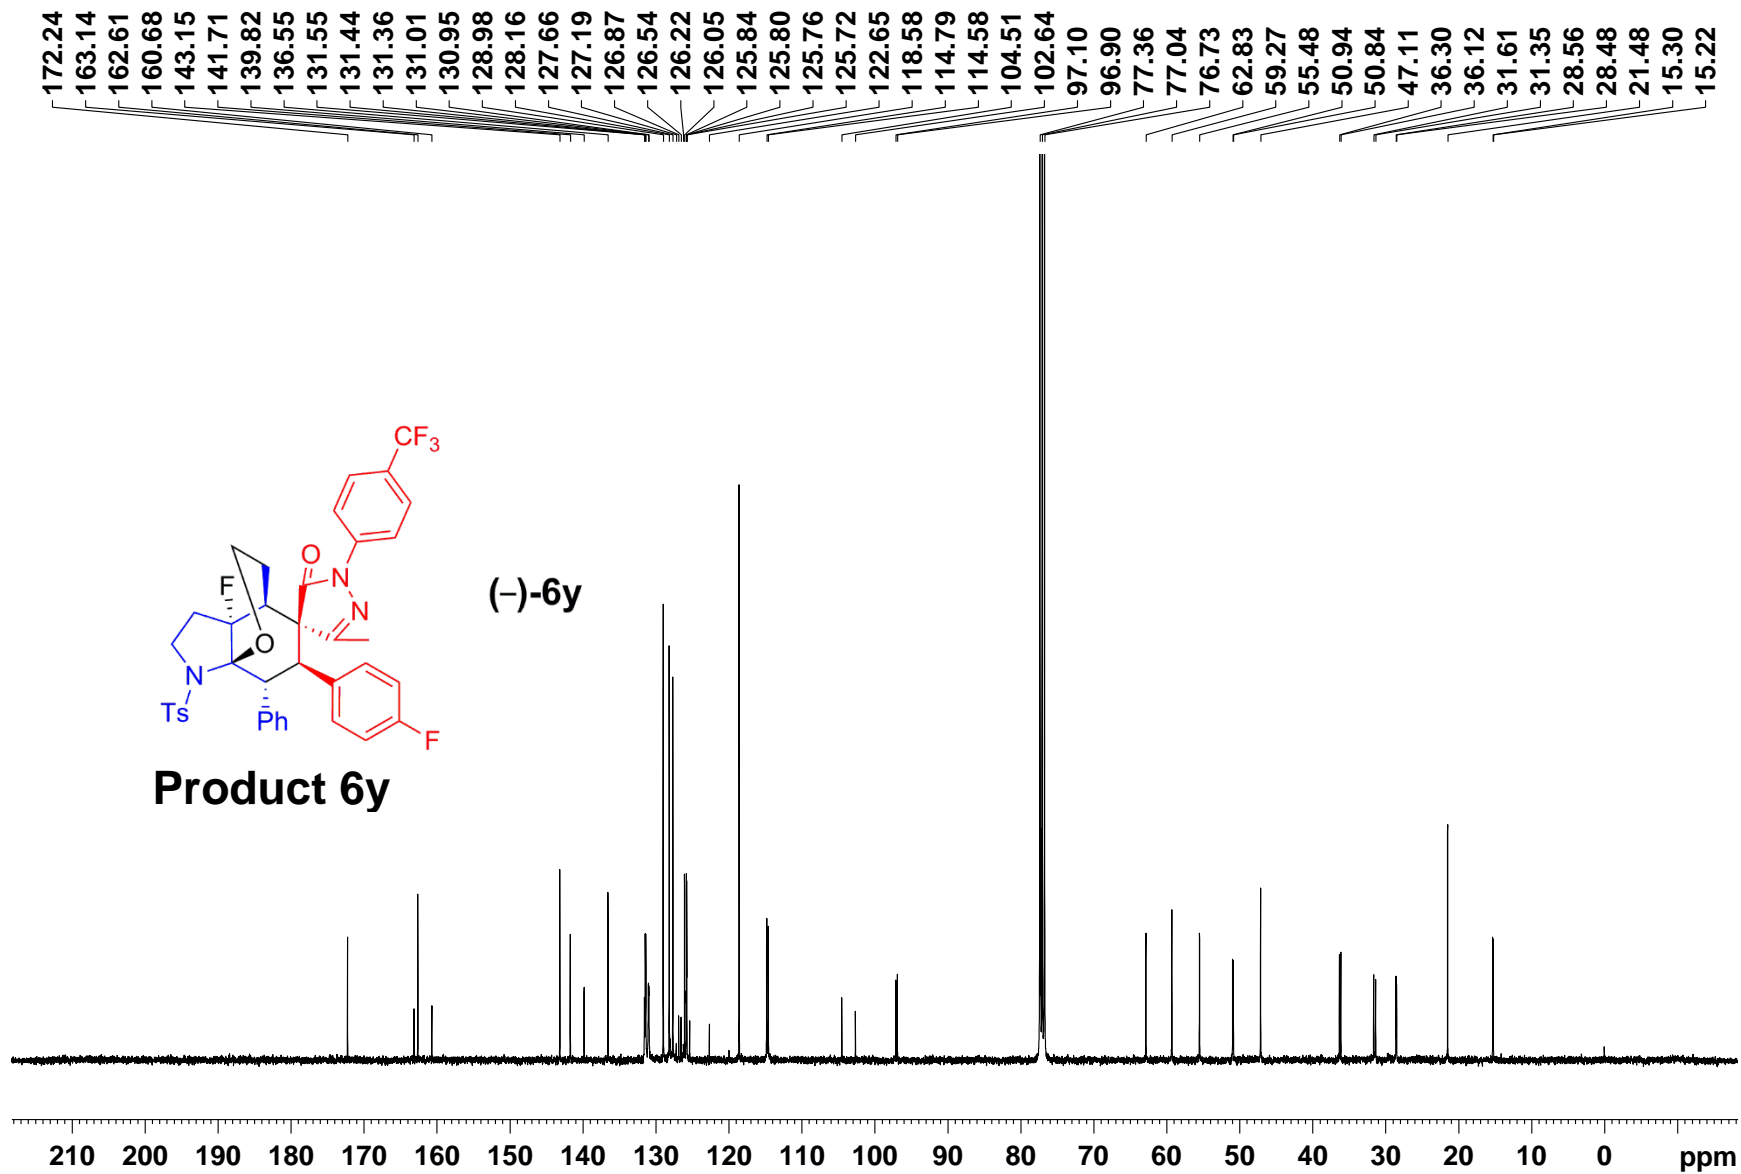

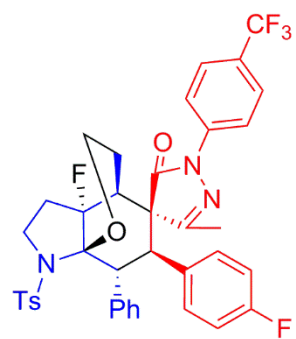

**Product 6y**

**(-)-6y**

-62.23

-114.27

-145.98

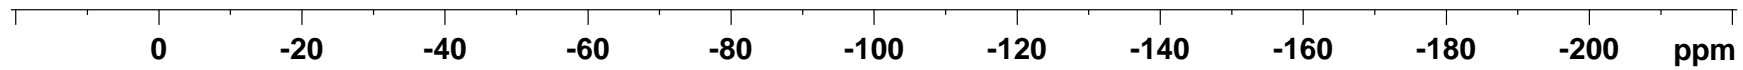

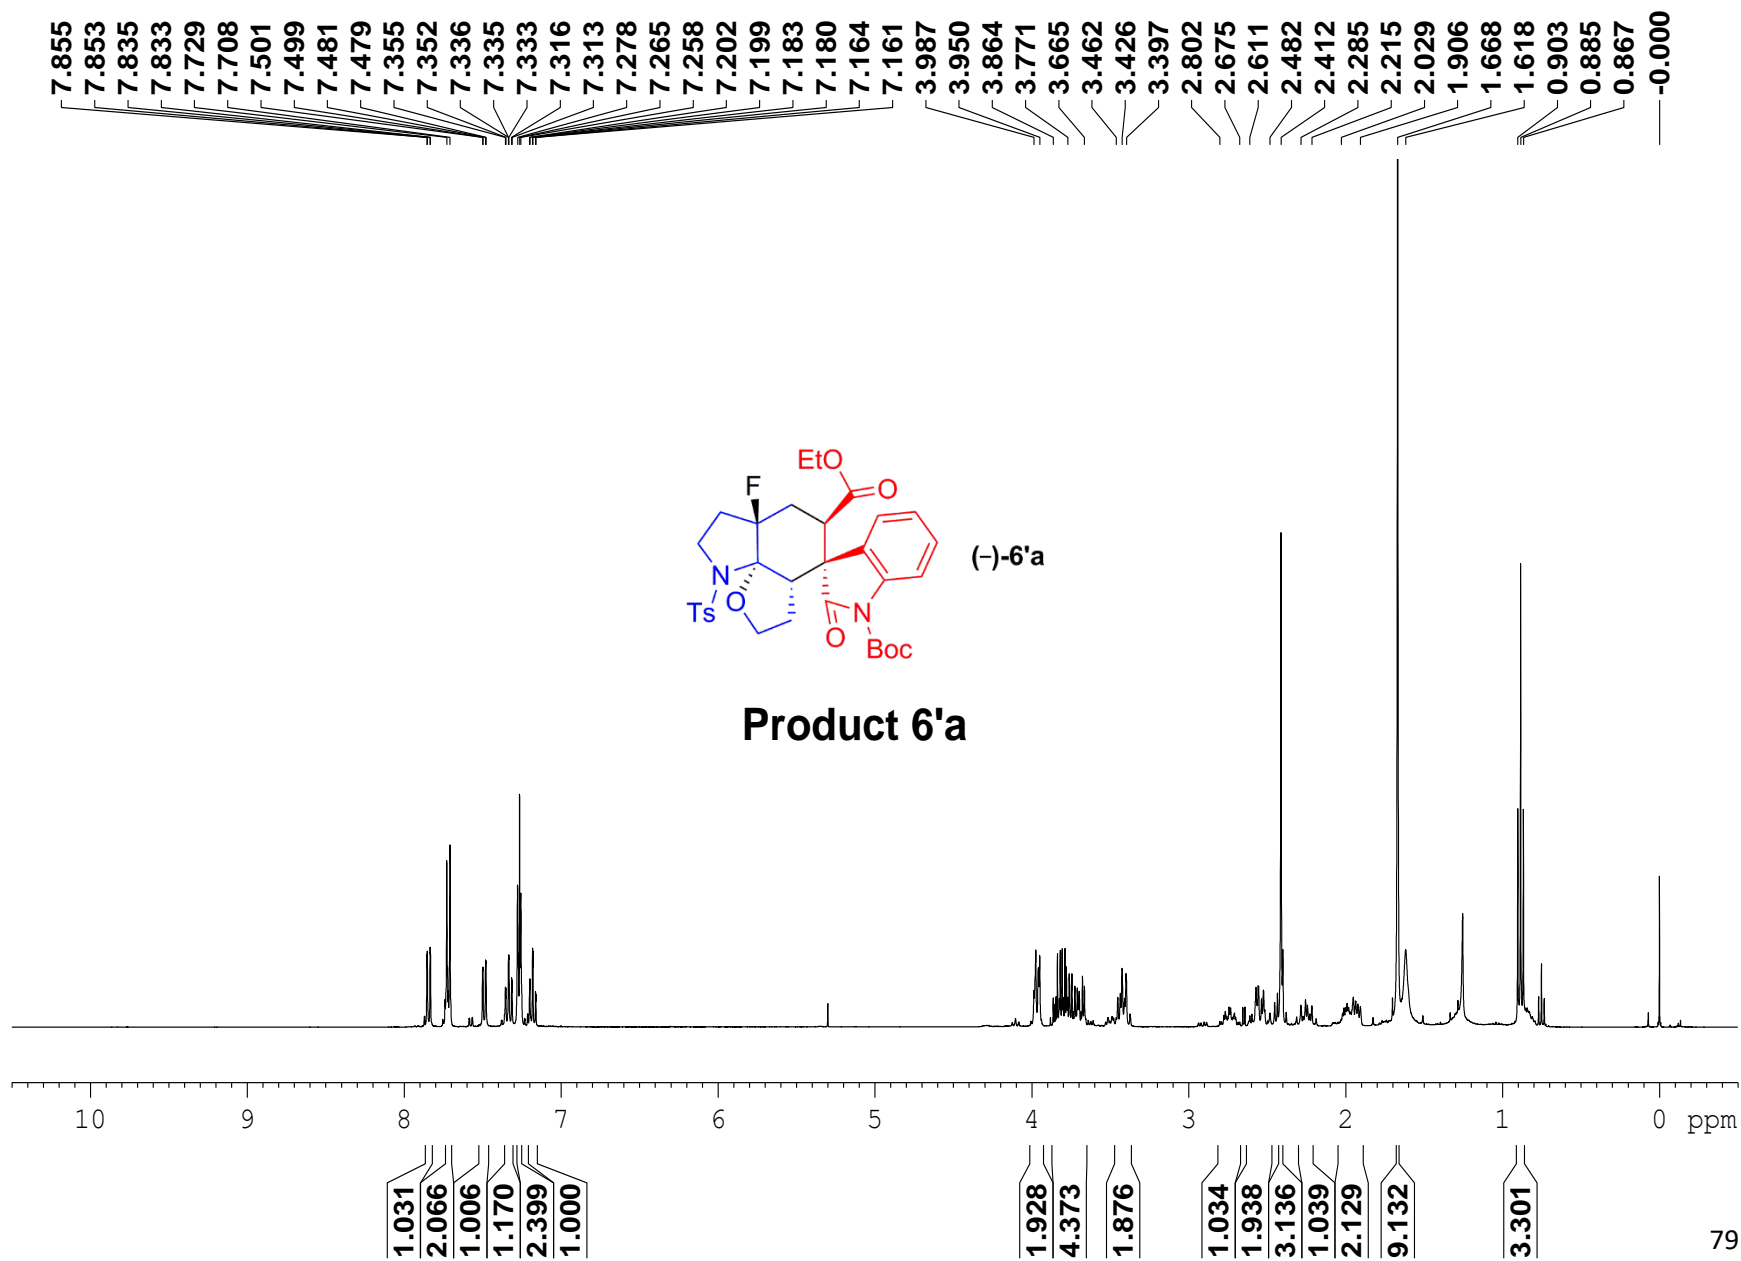

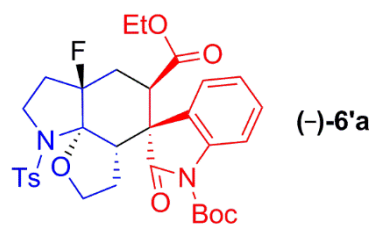

Product 6'a

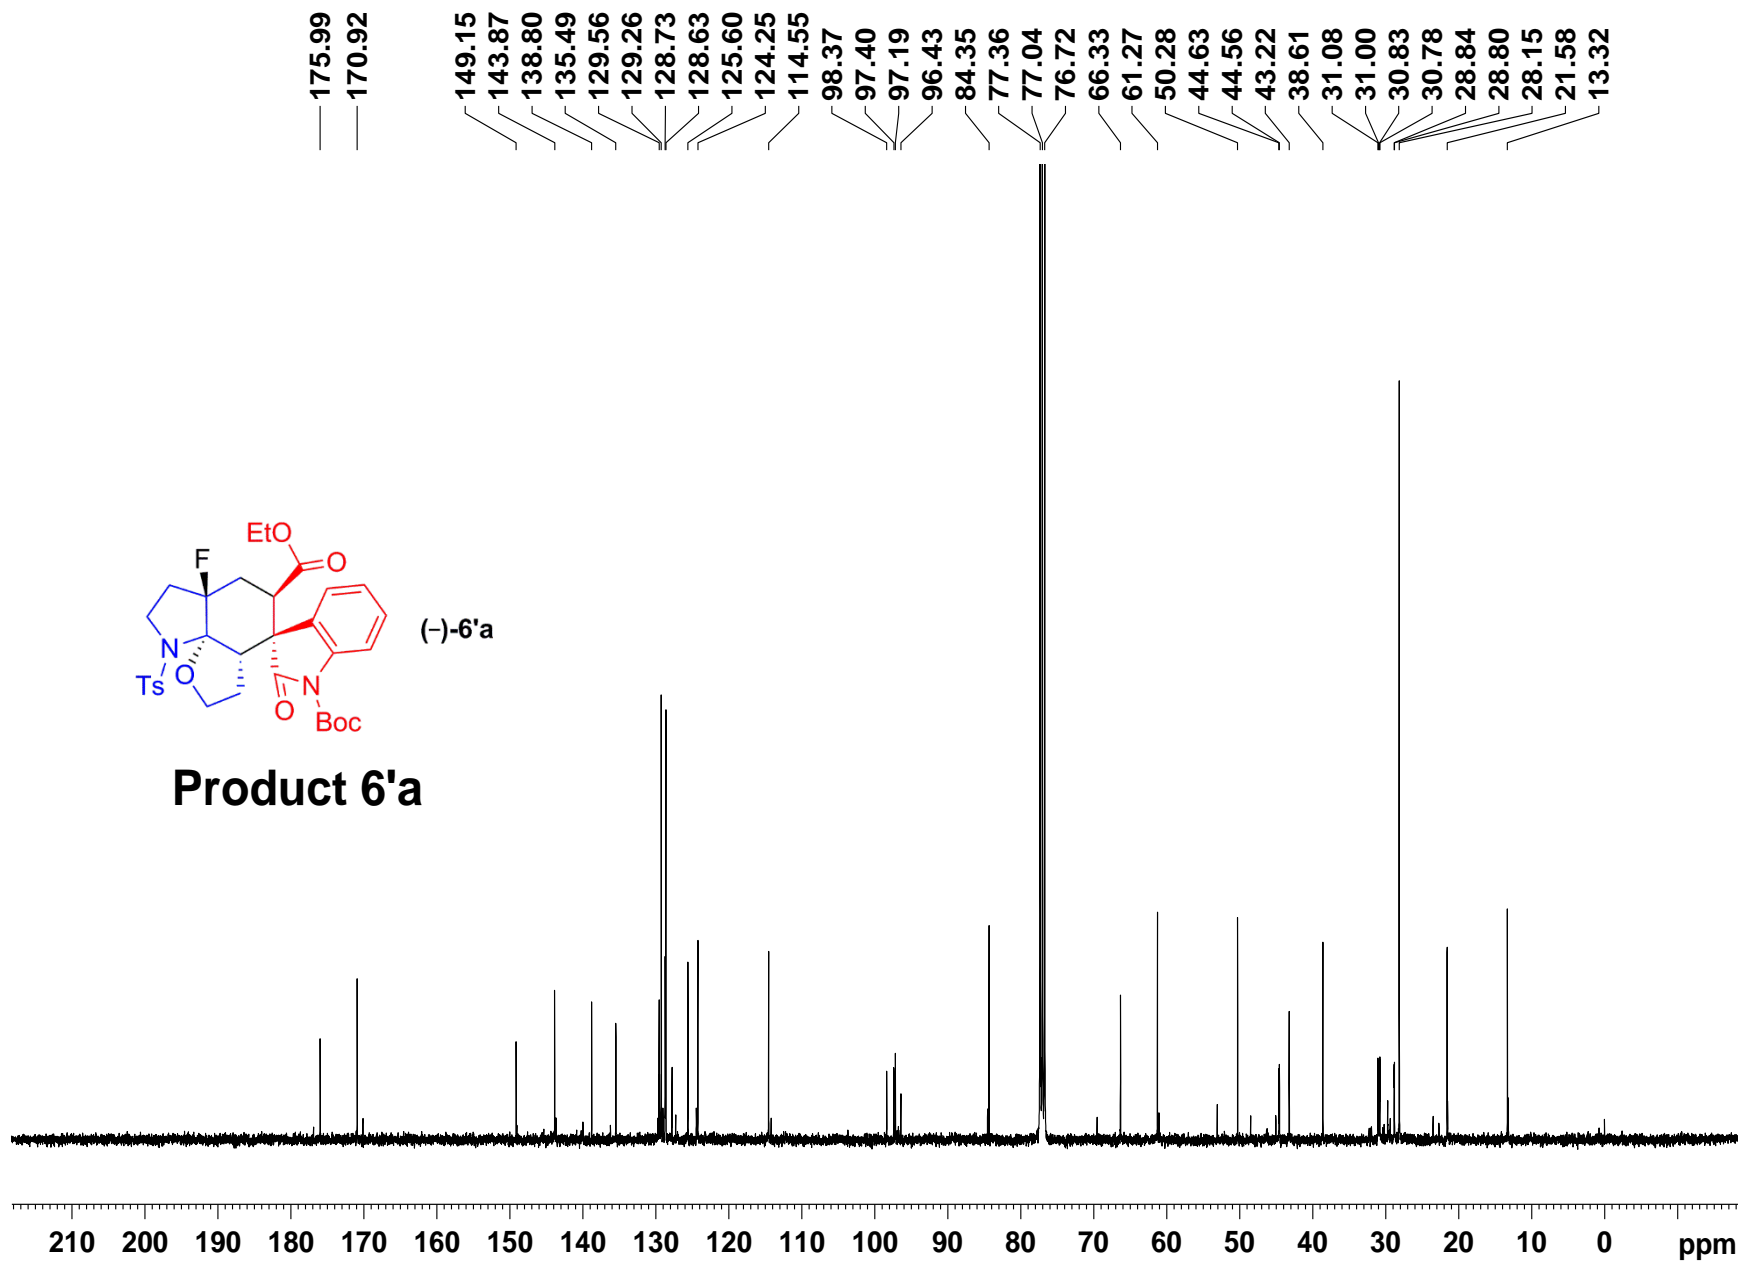



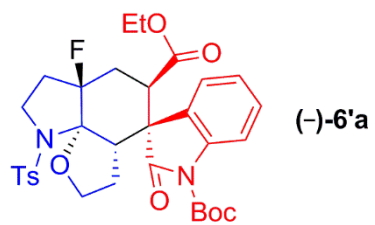

Product 6'a

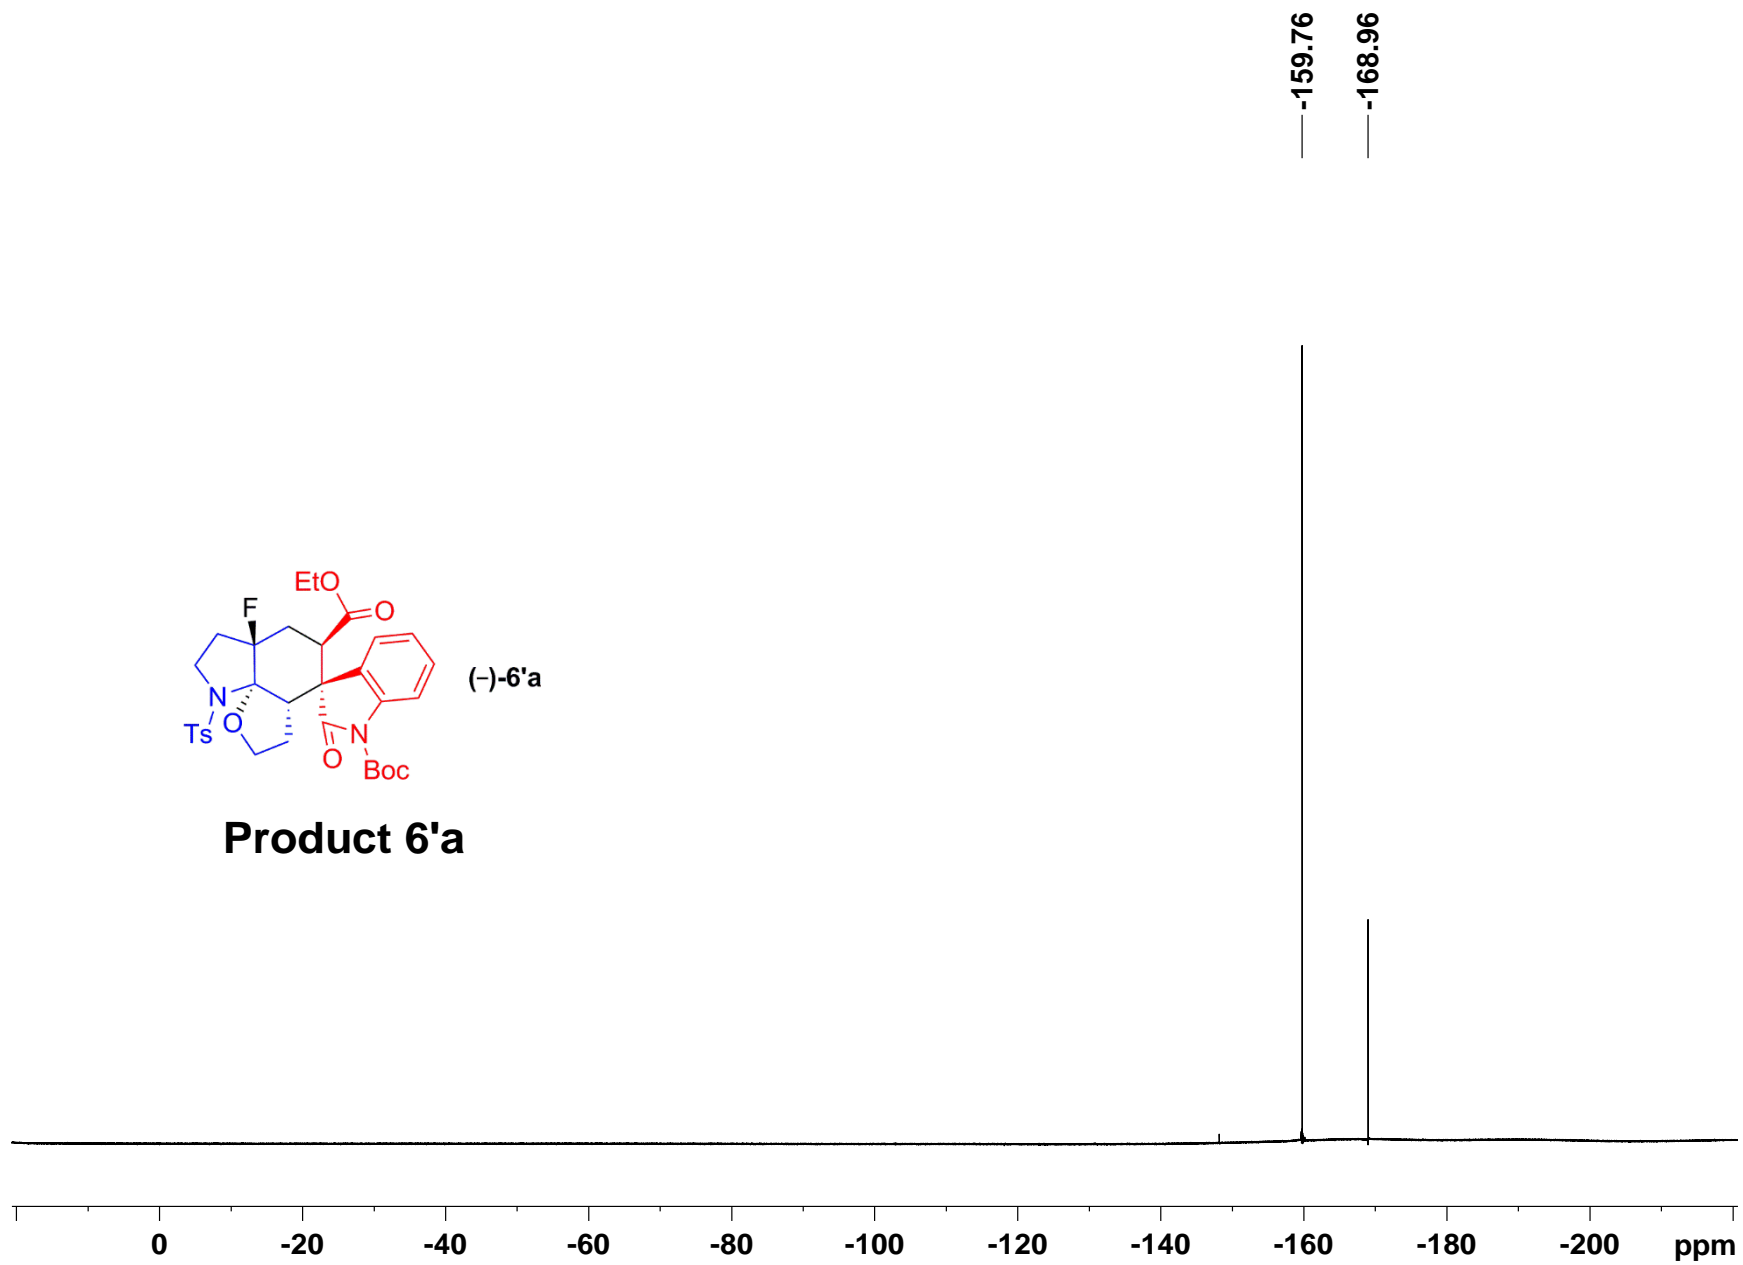

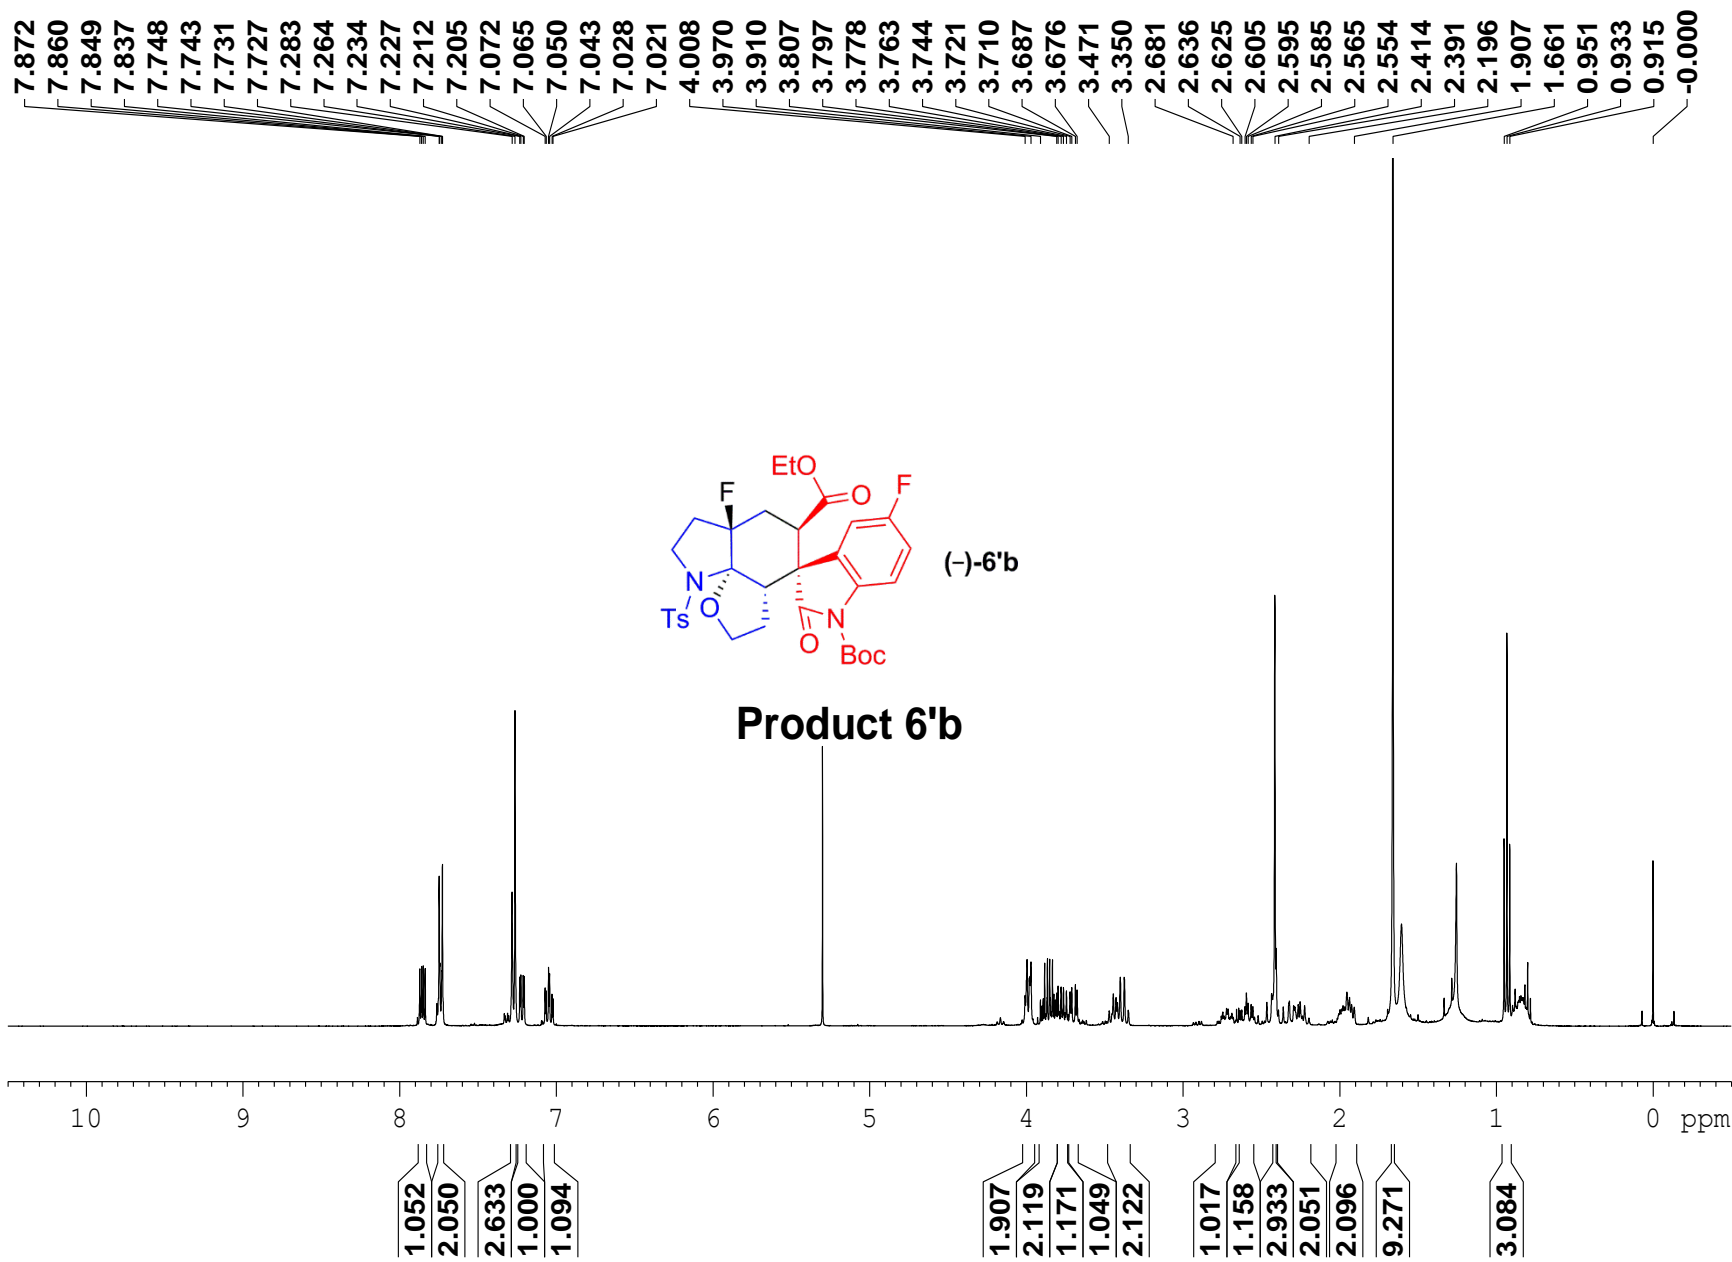

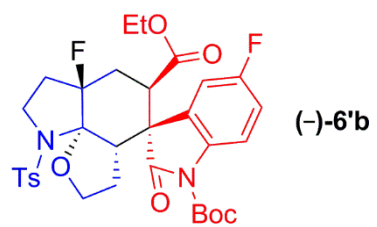

**Product 6'b**

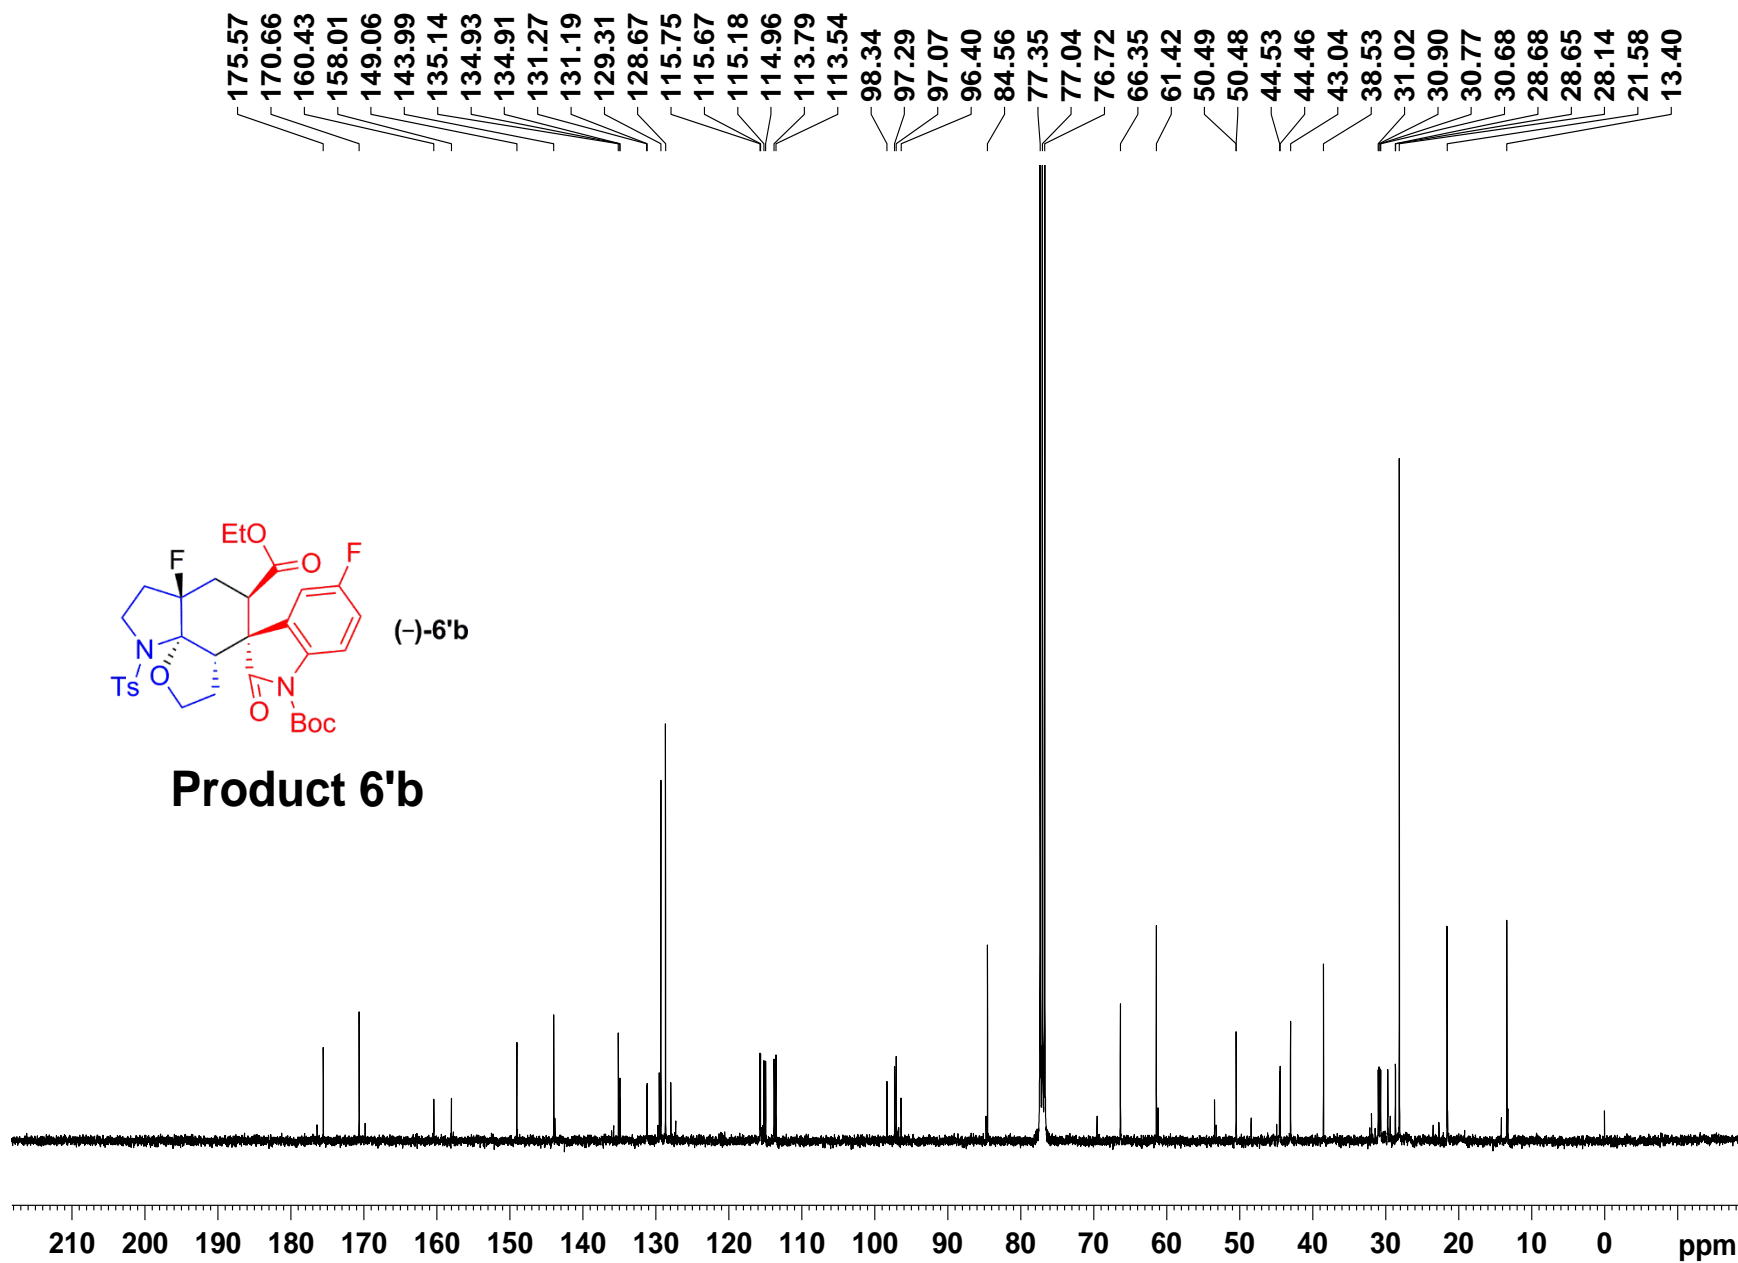

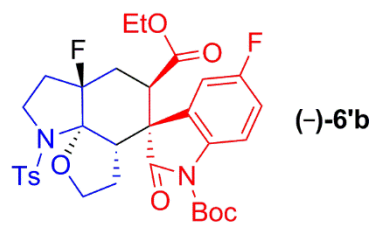

**Product 6'b**

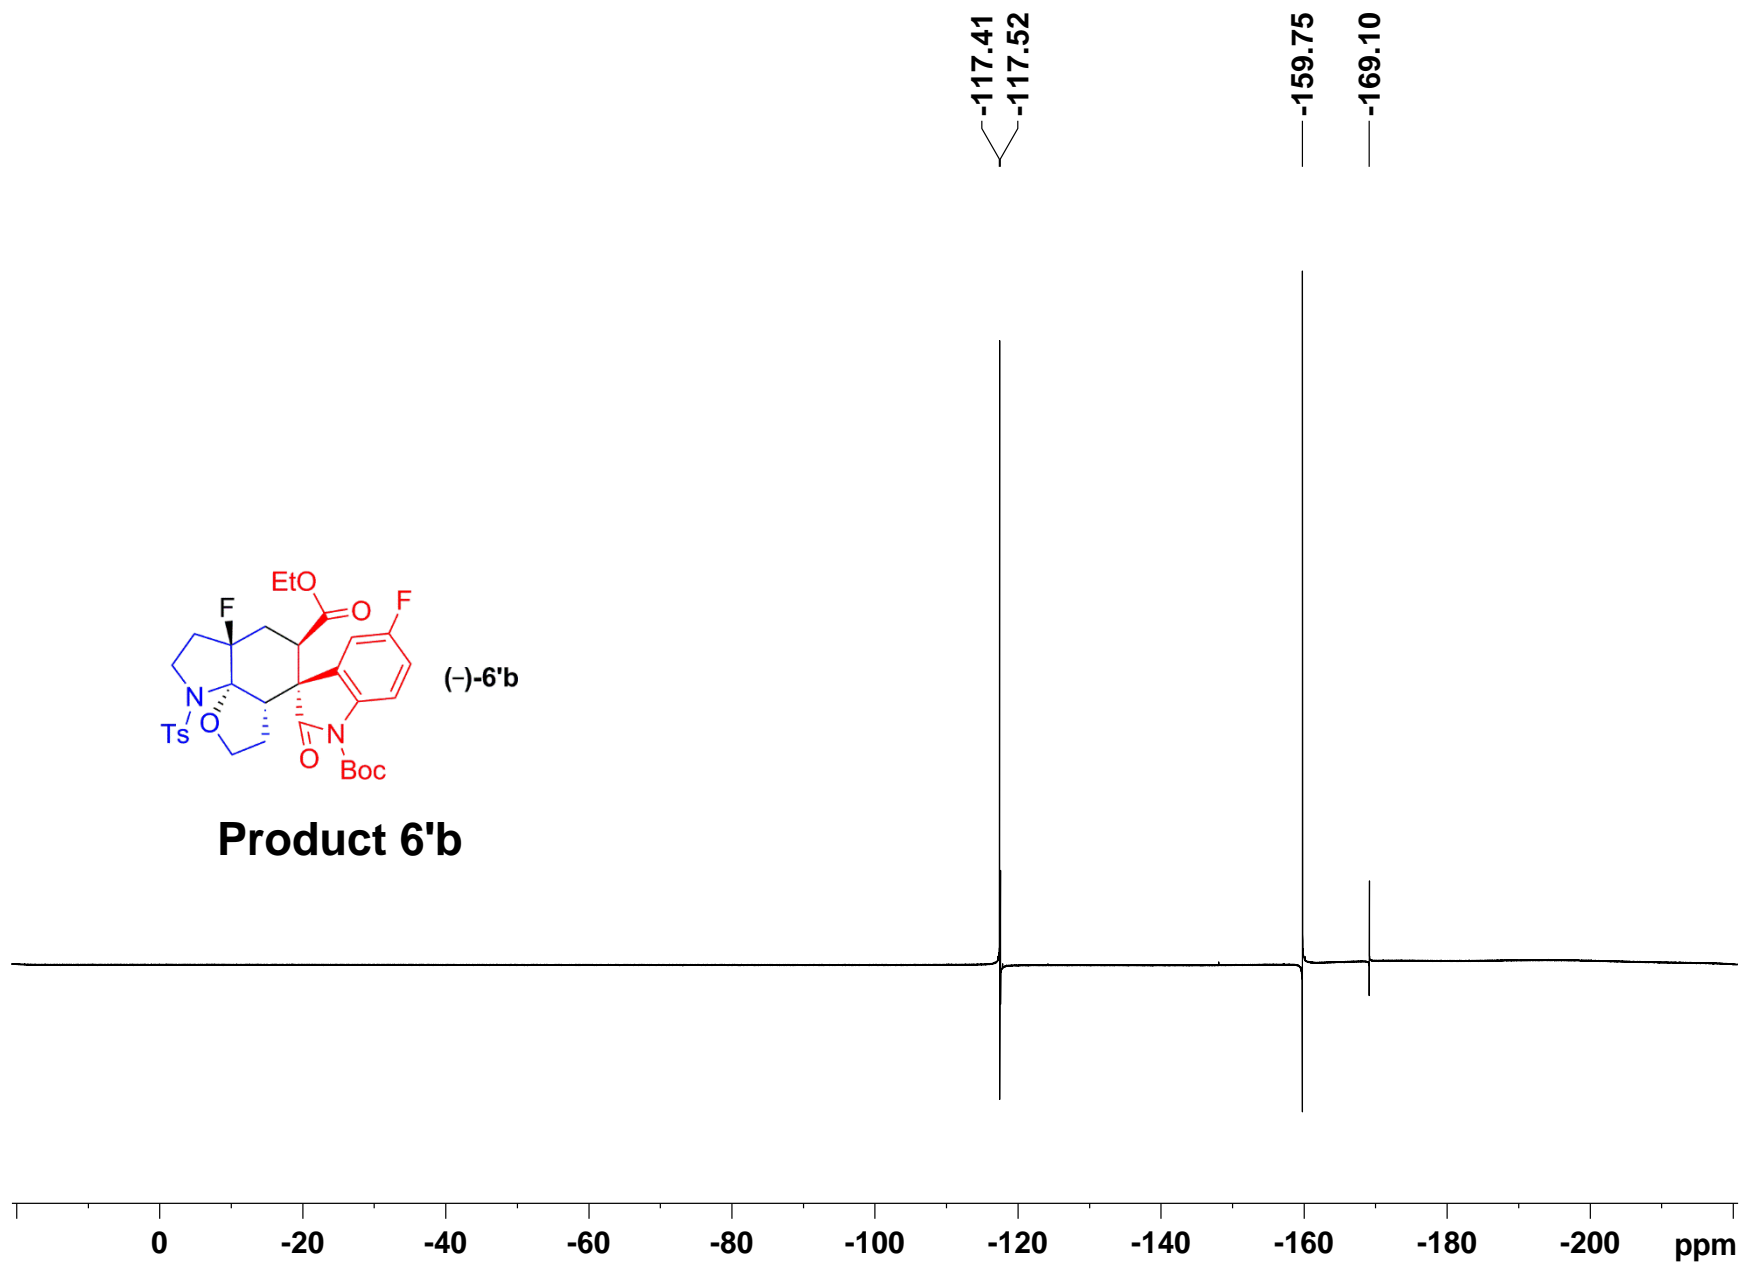

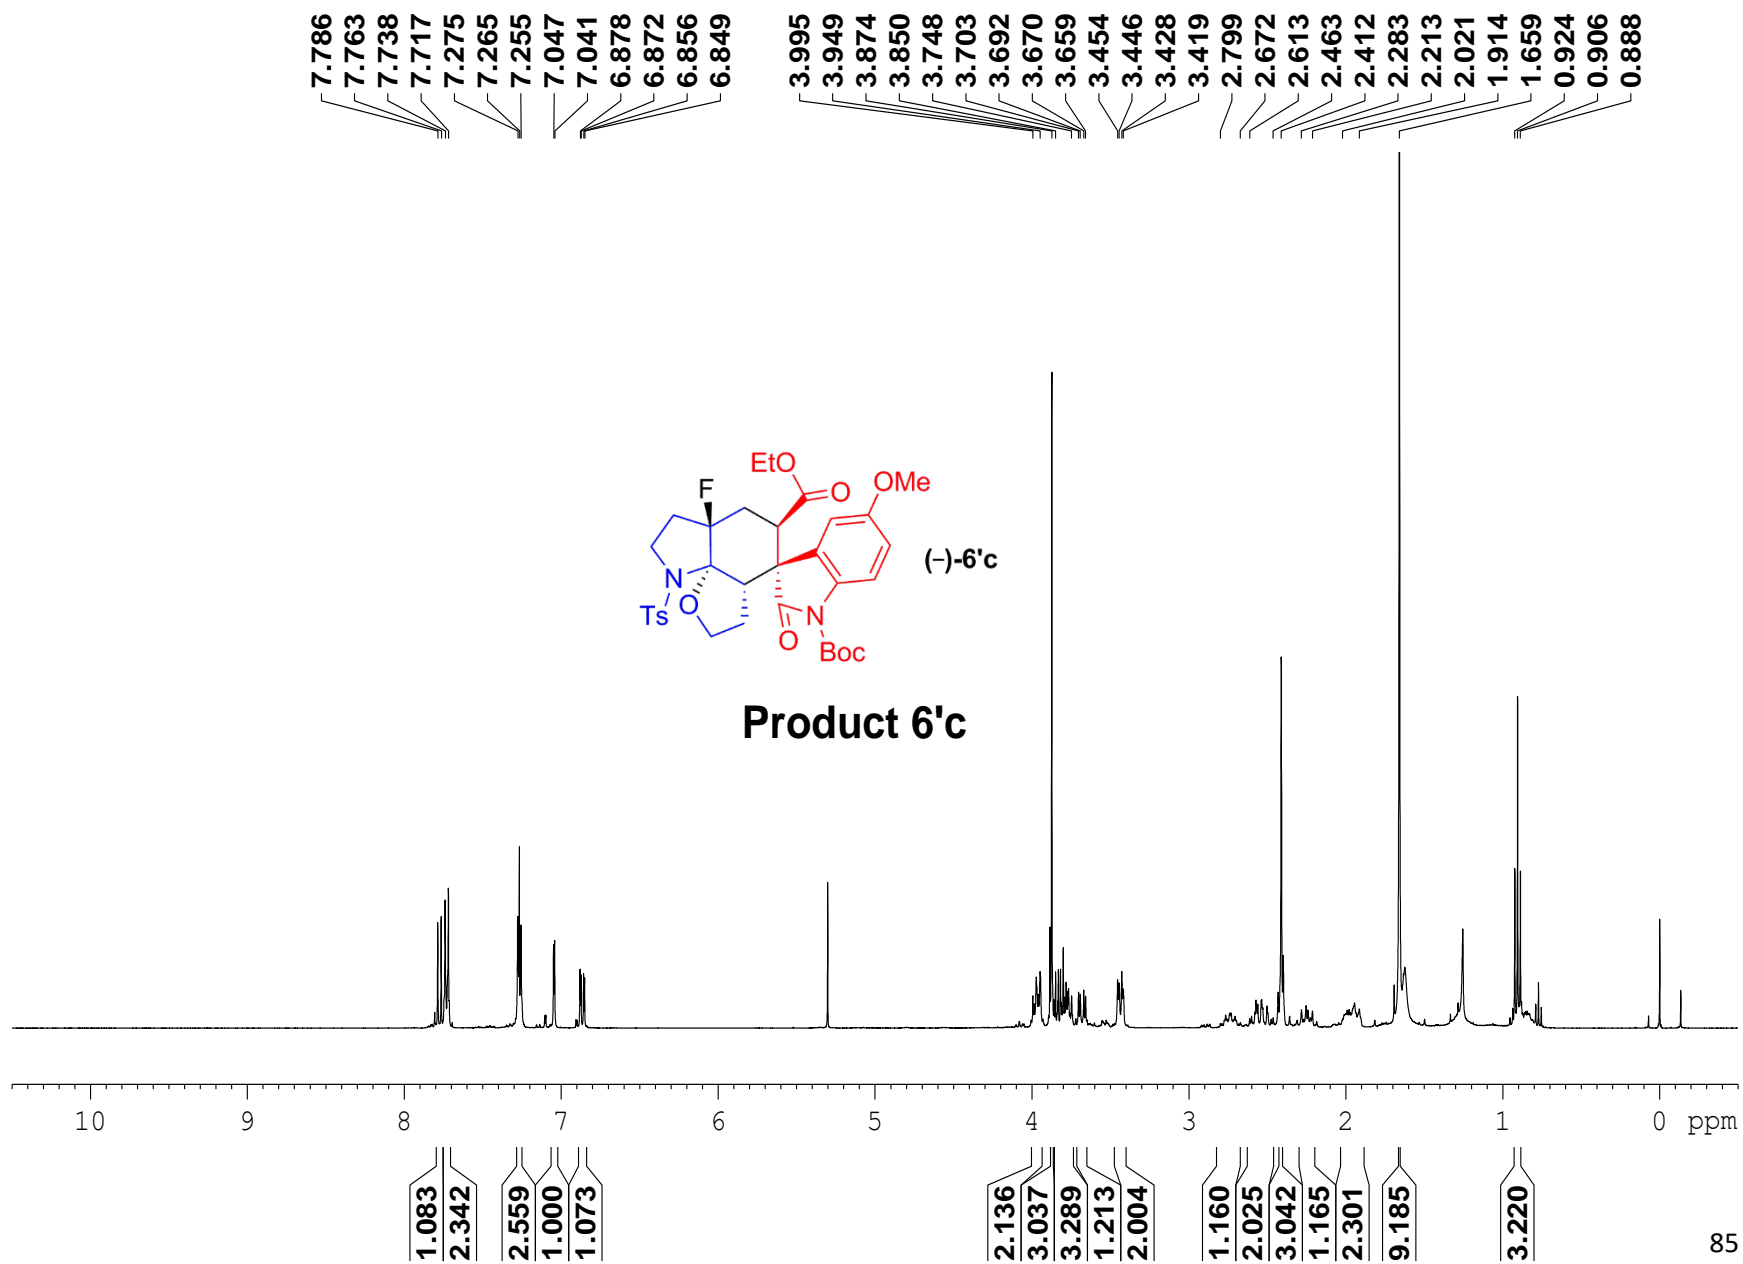

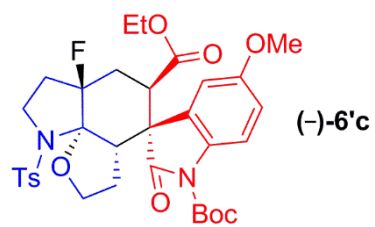

Product 6'c

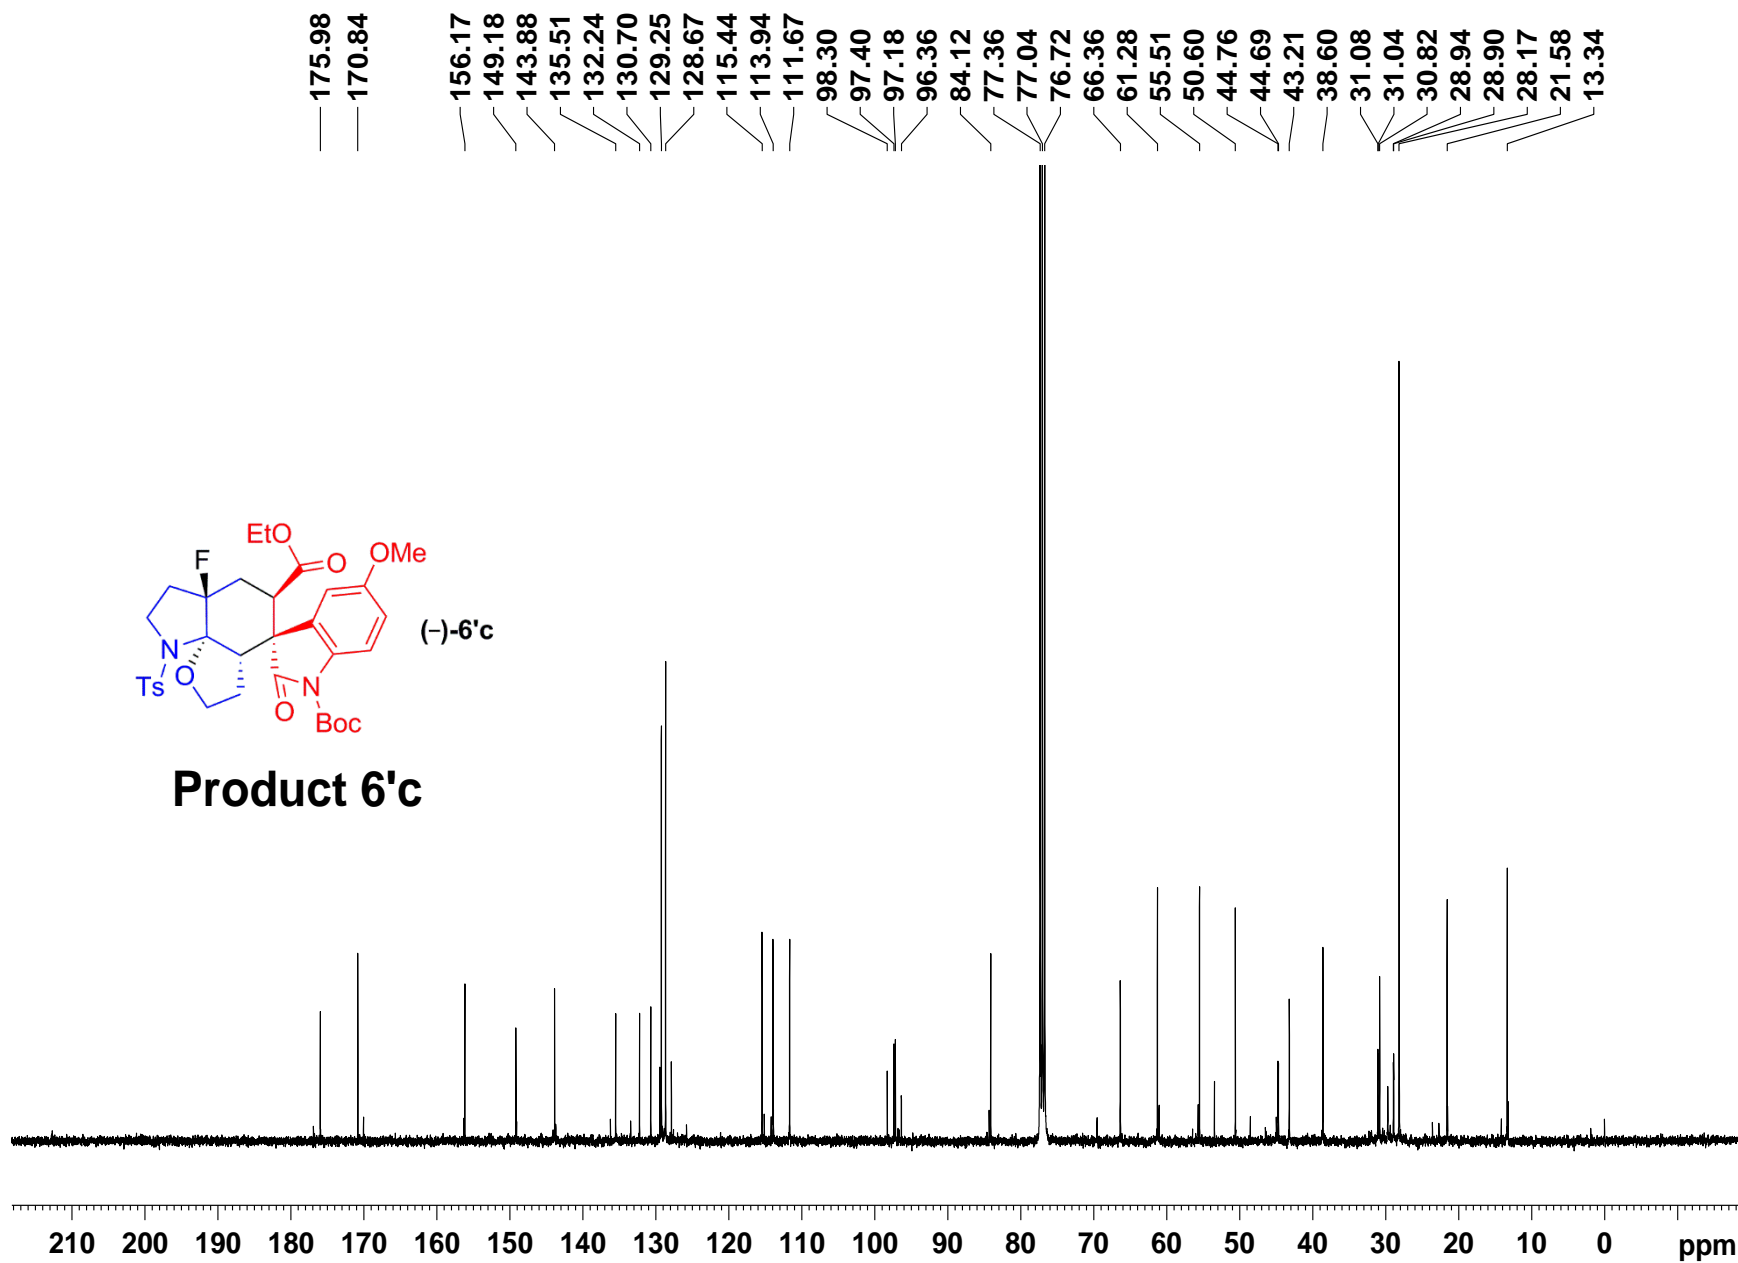

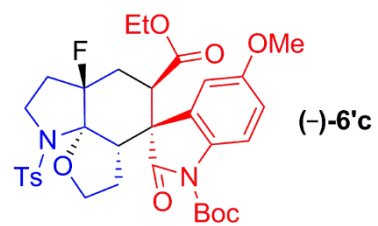

Product 6'c

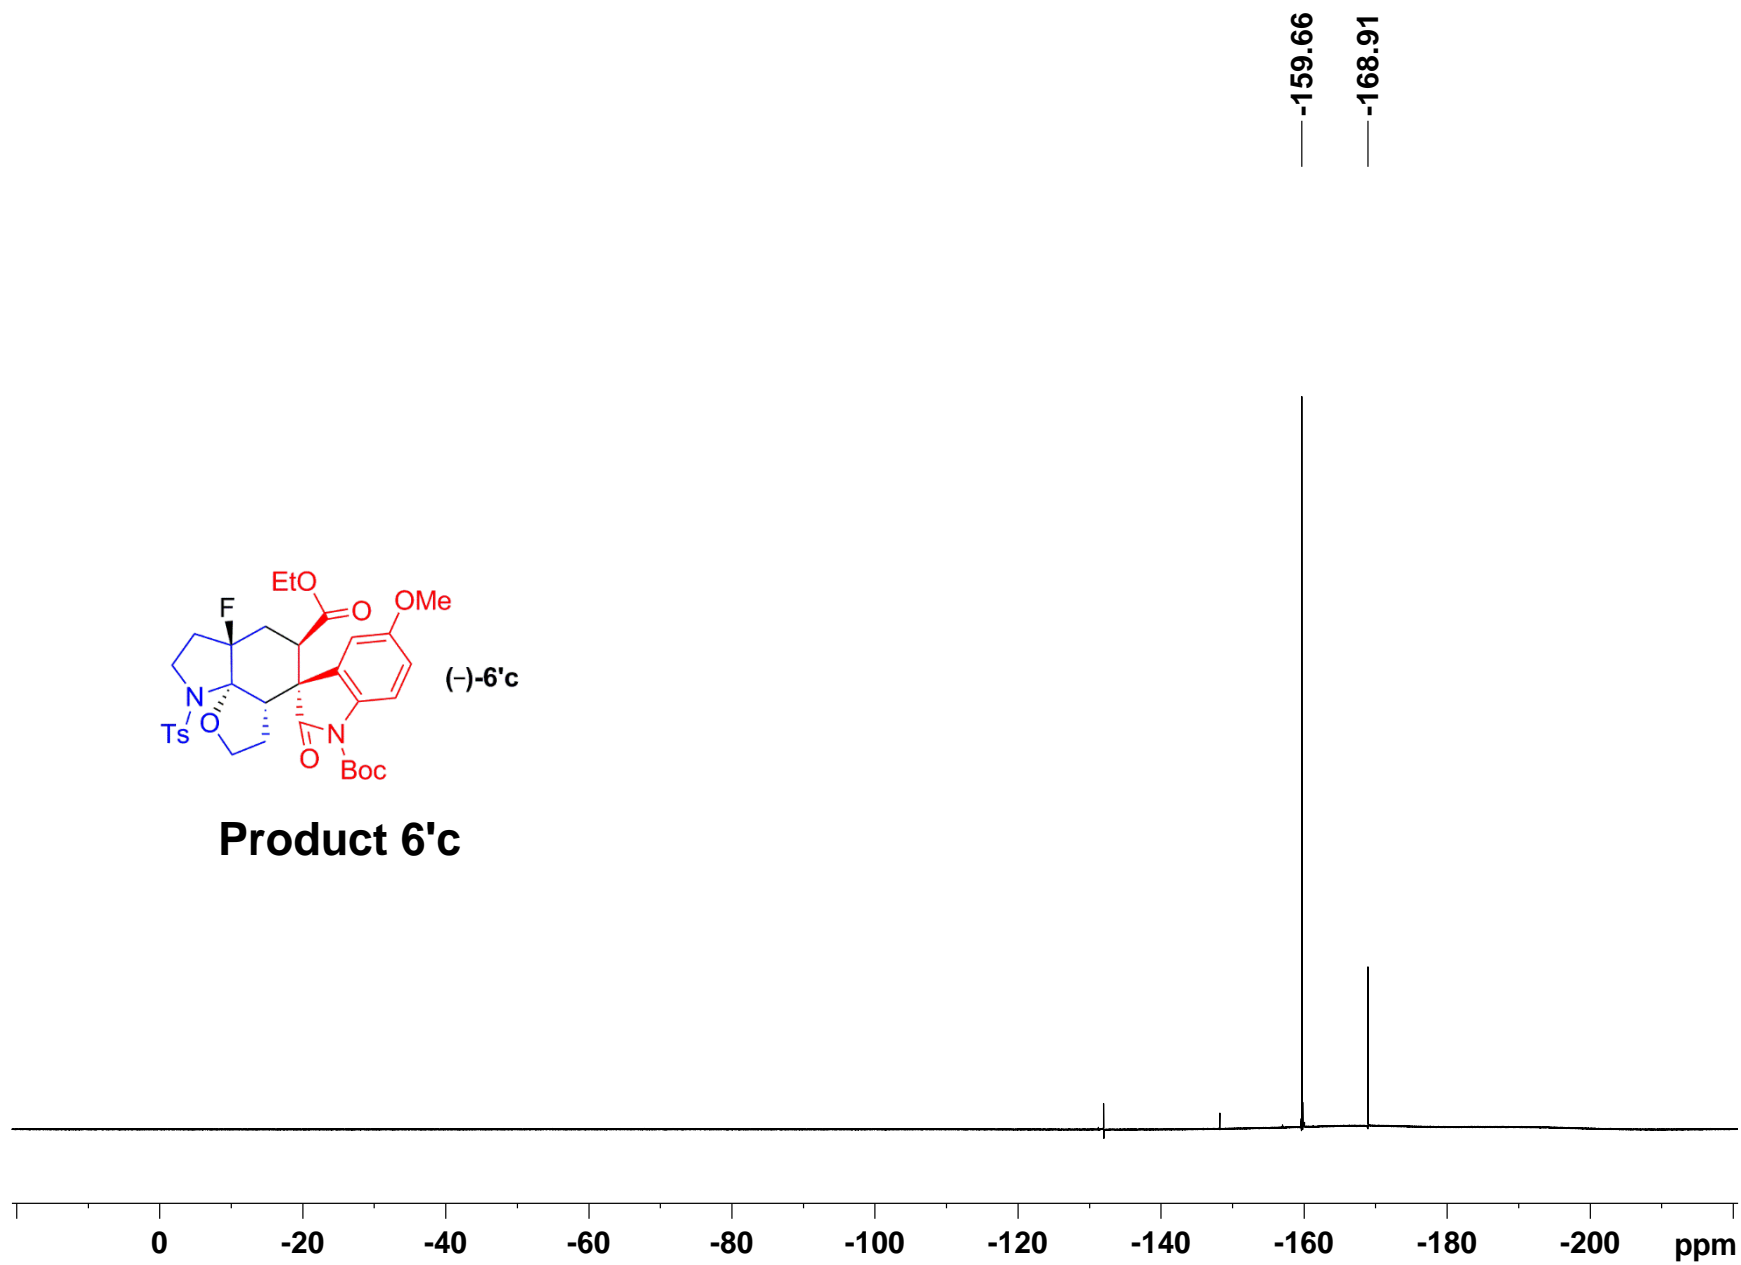

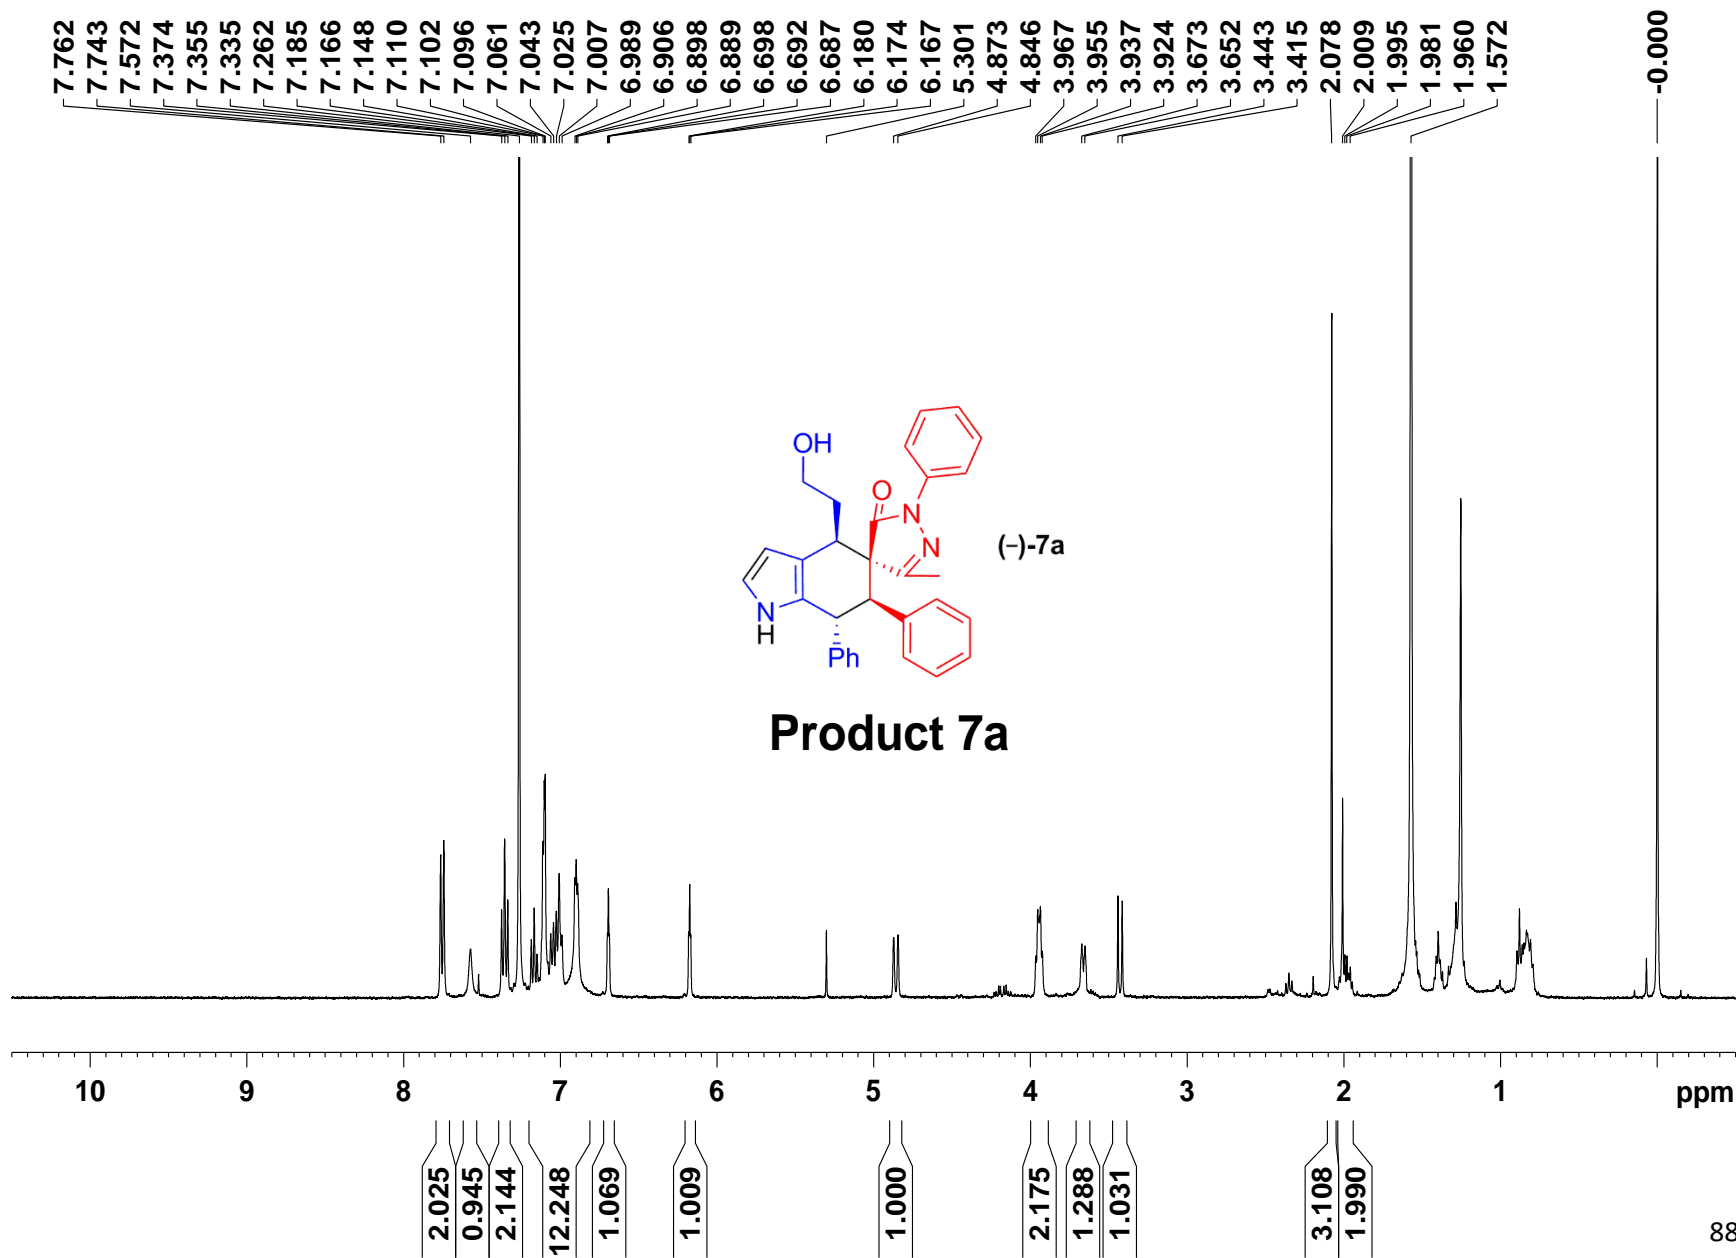



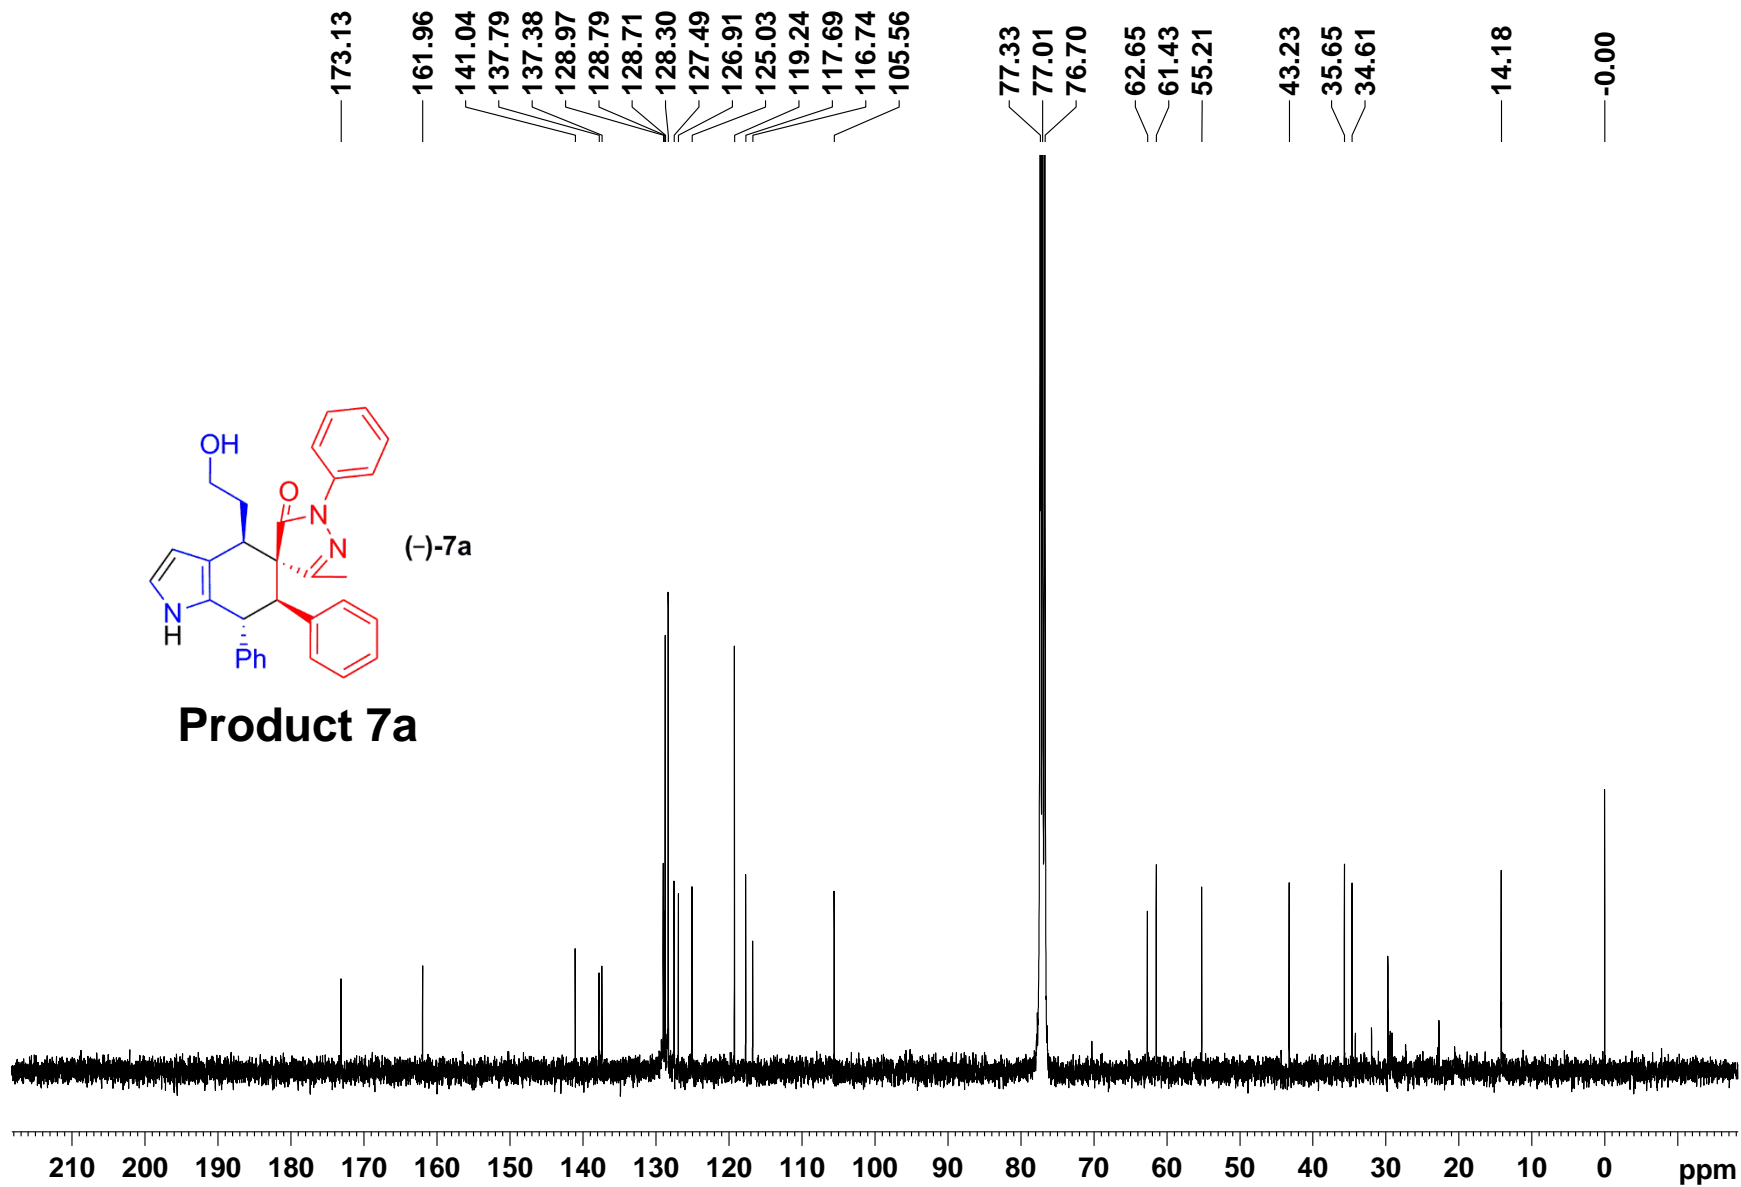

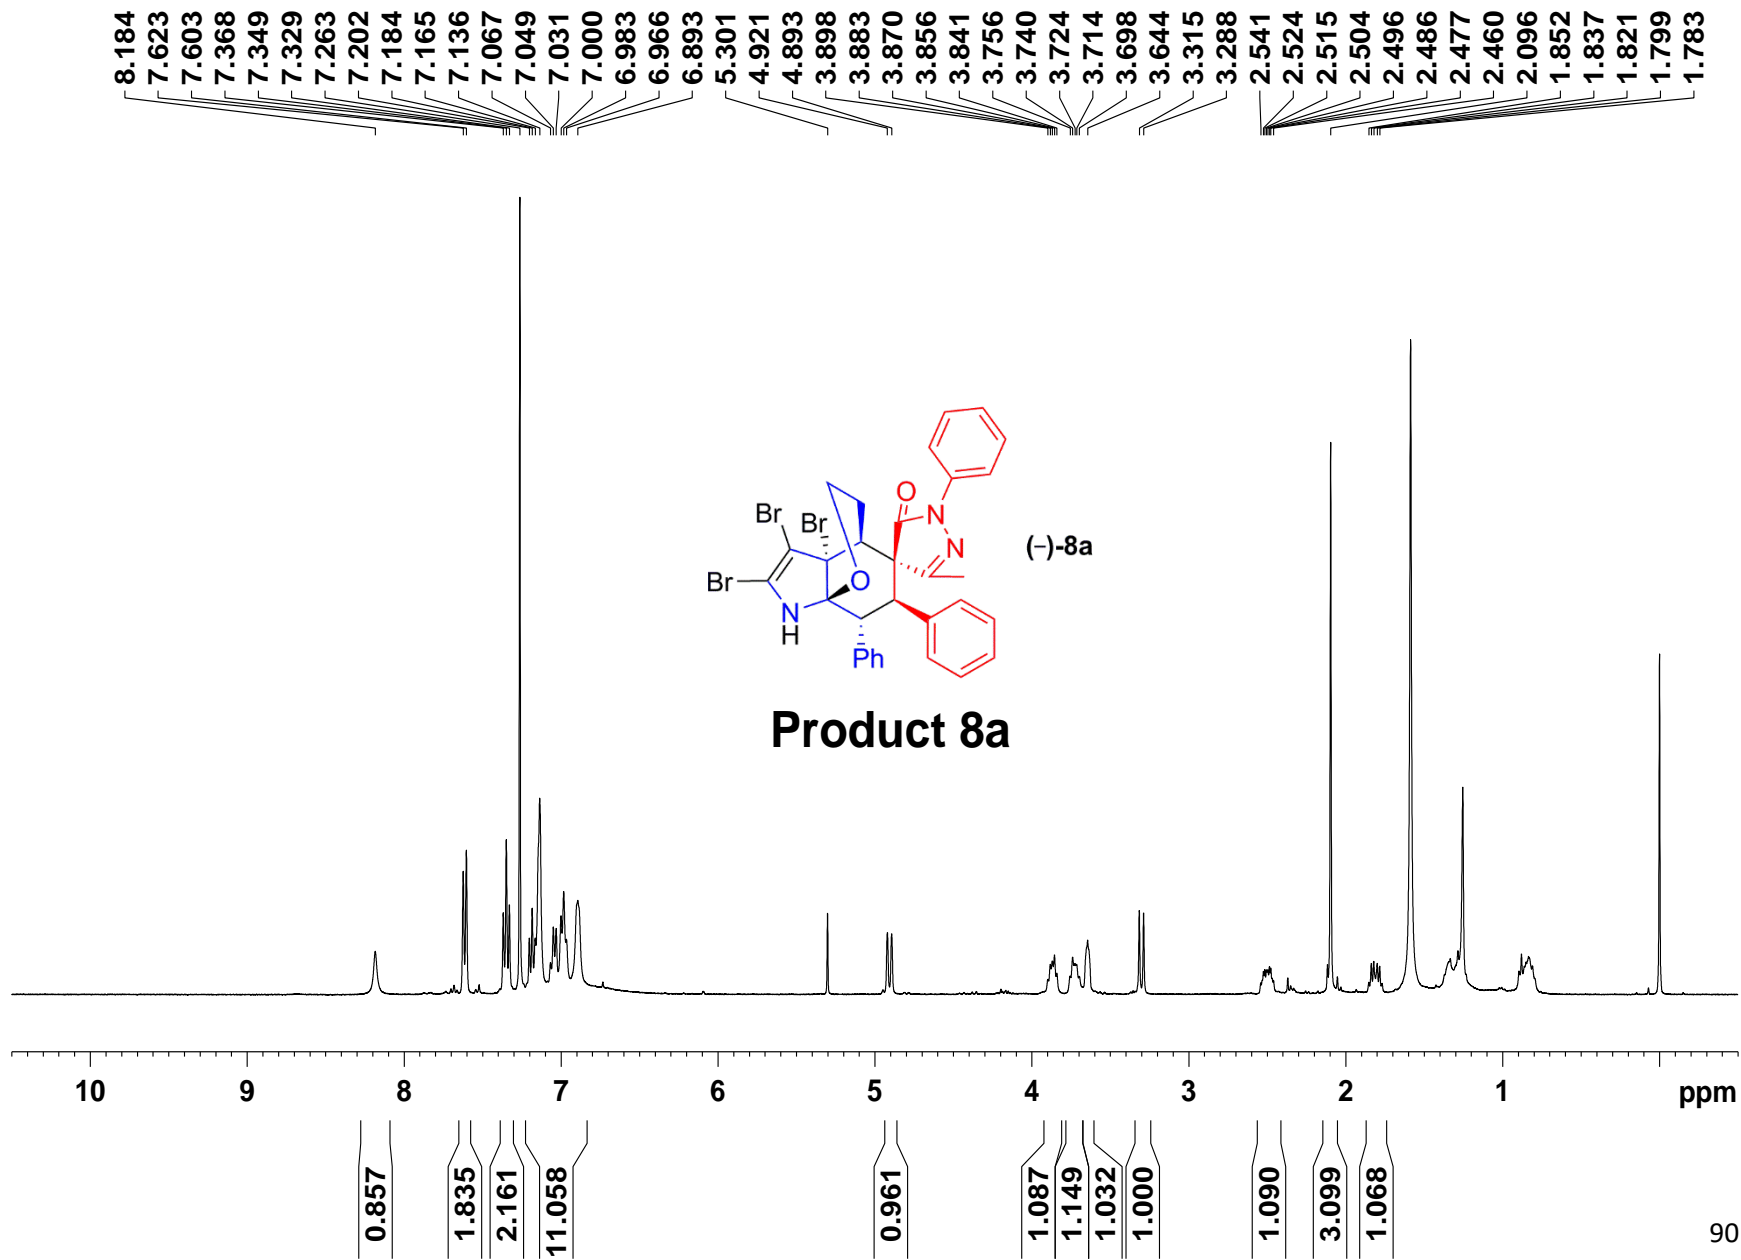

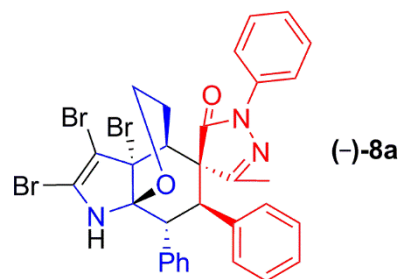

Product 8a

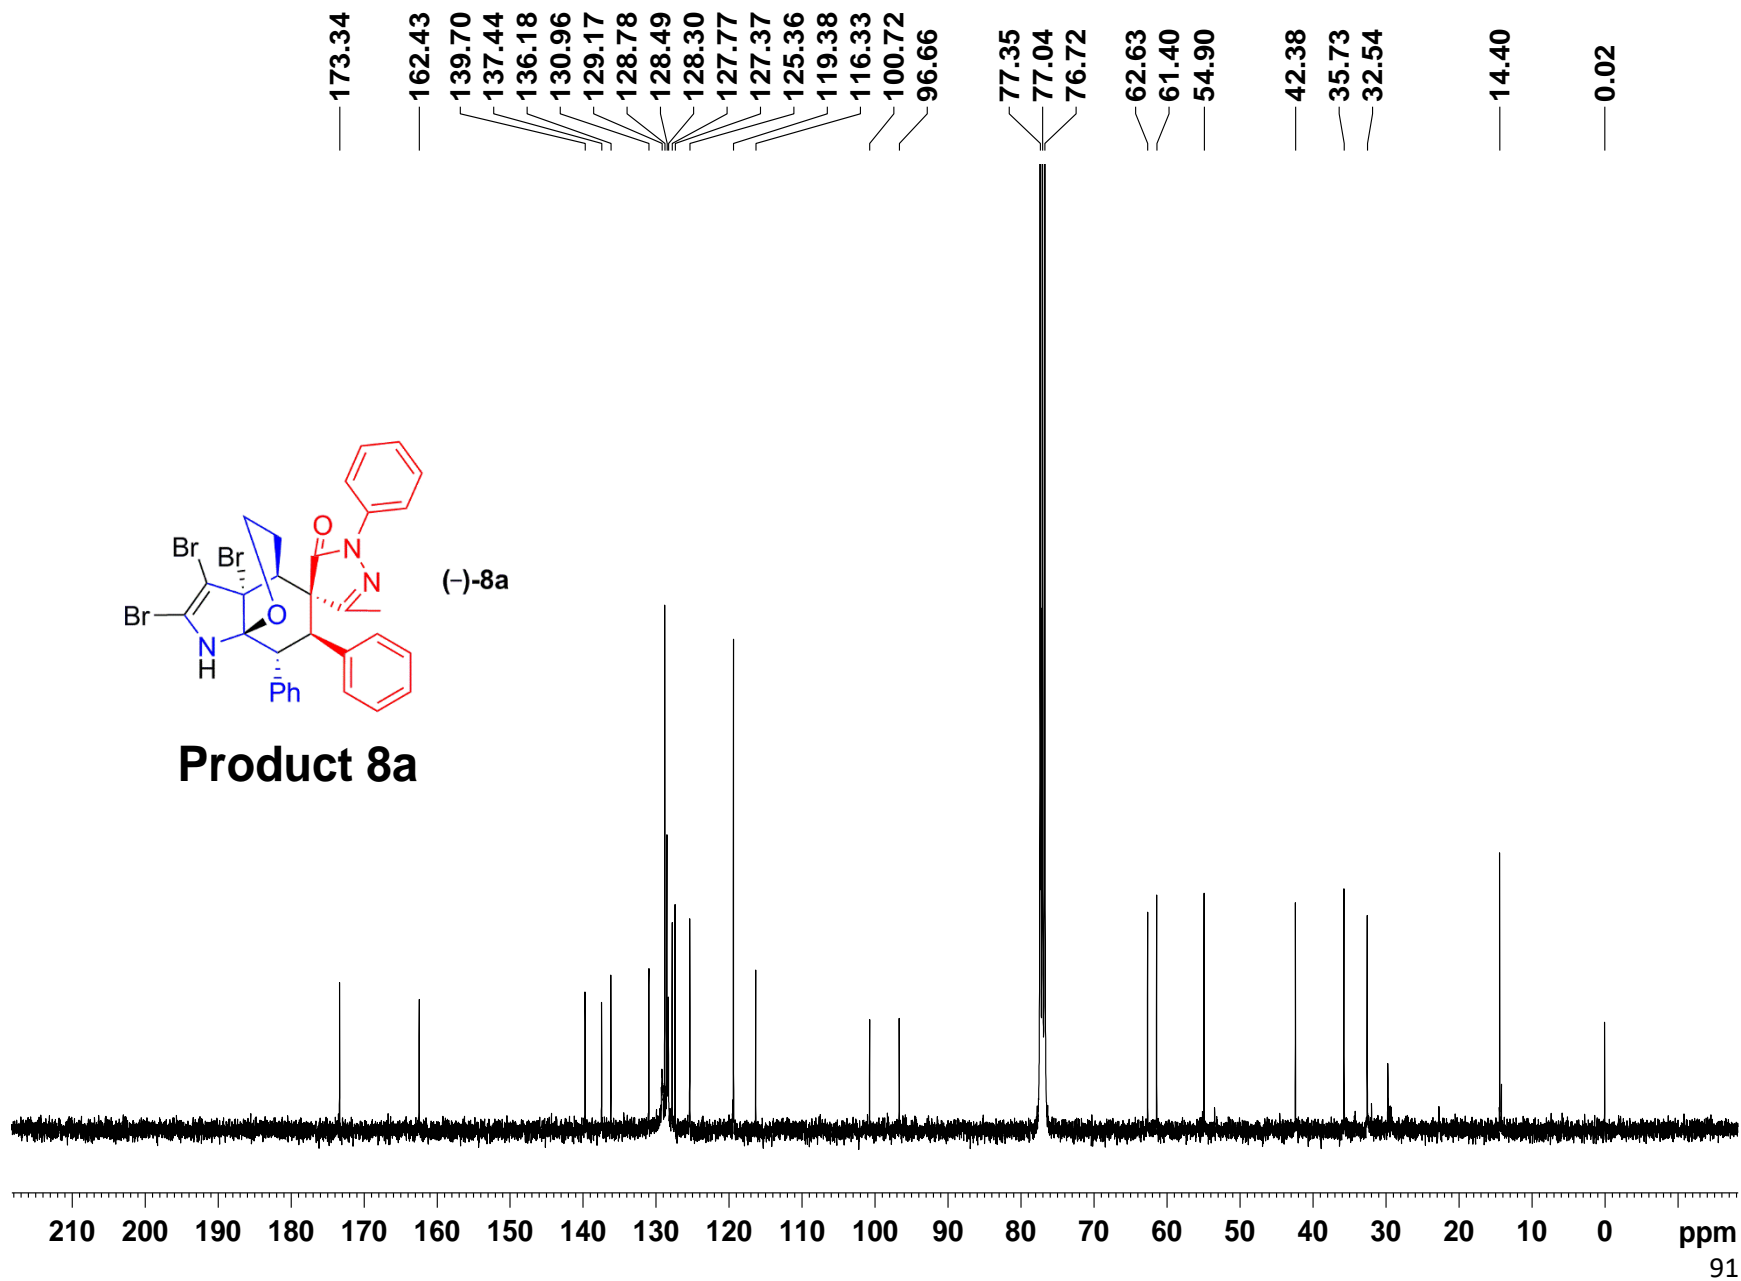

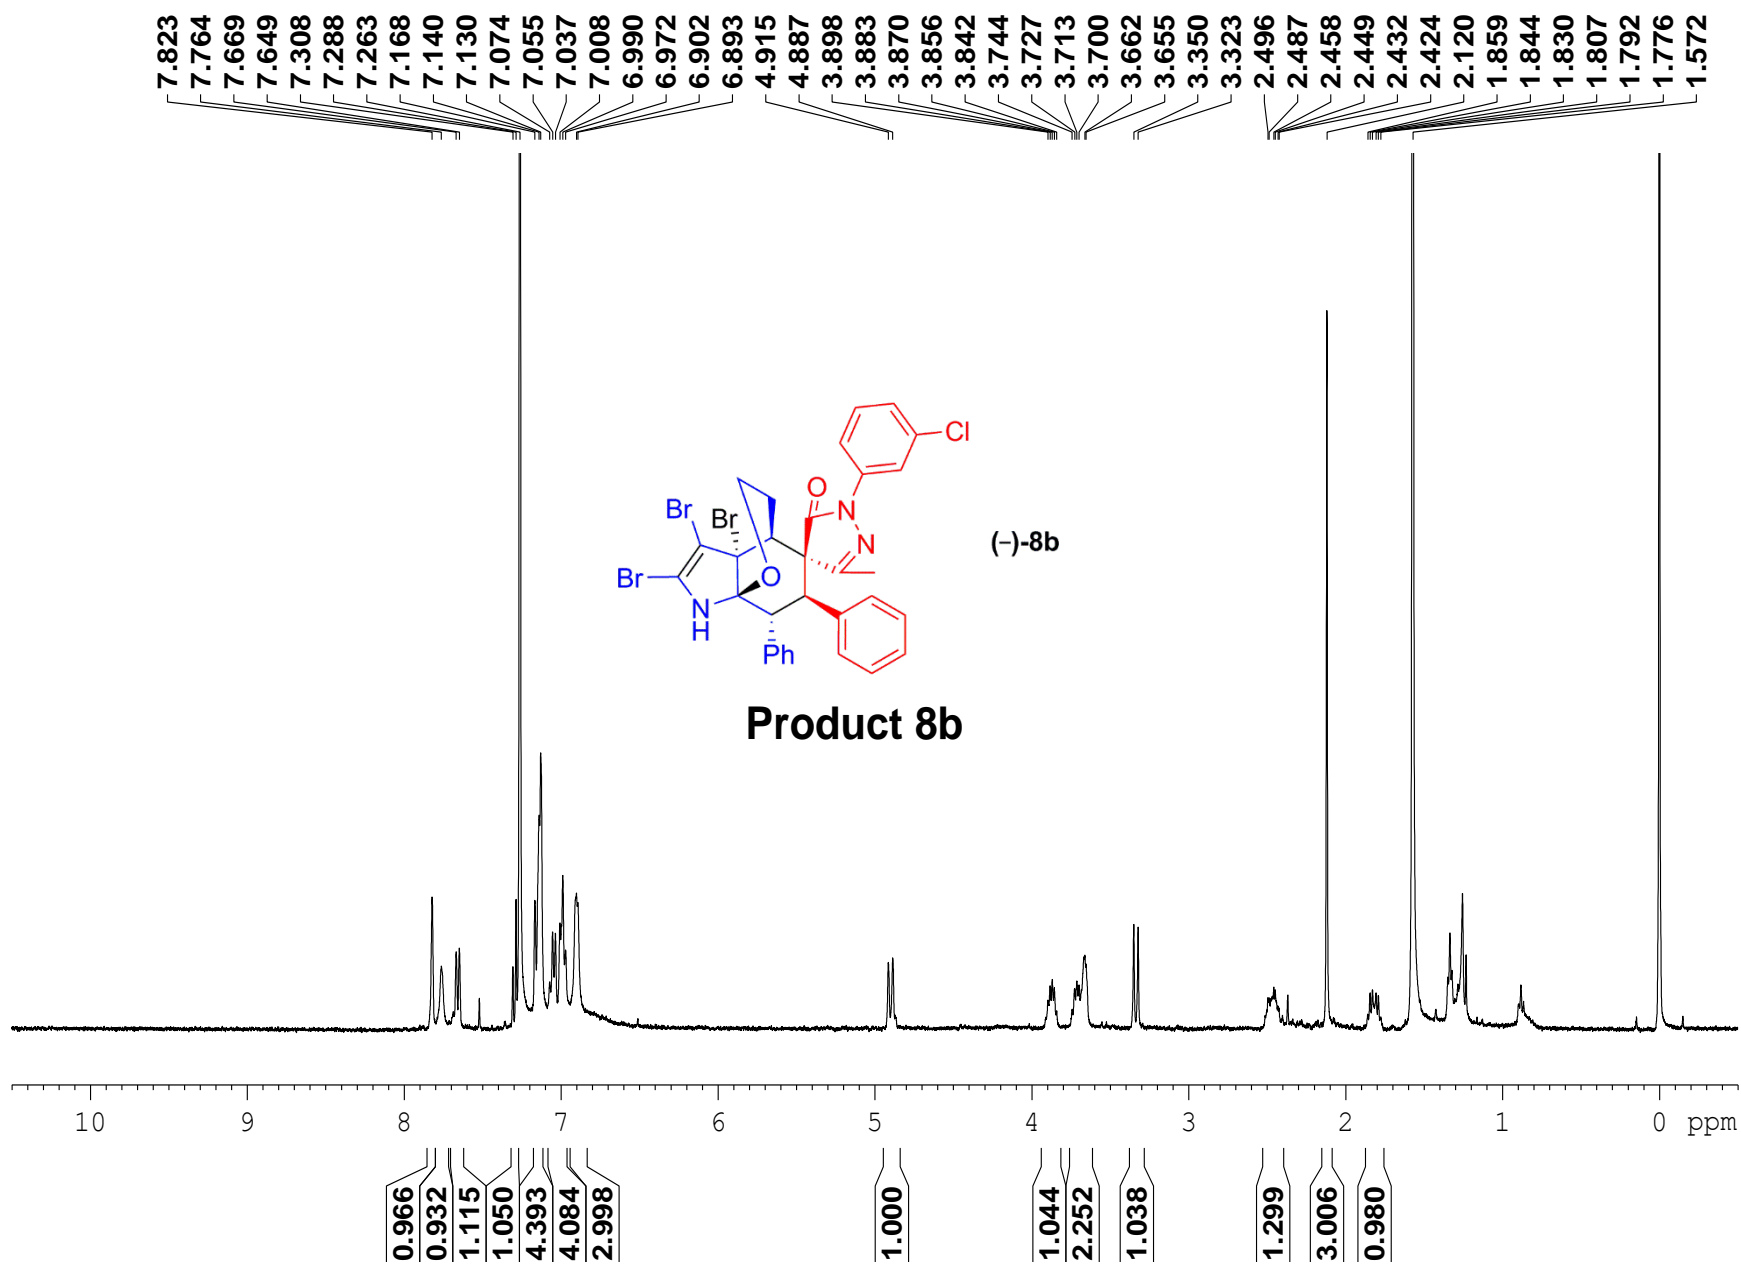

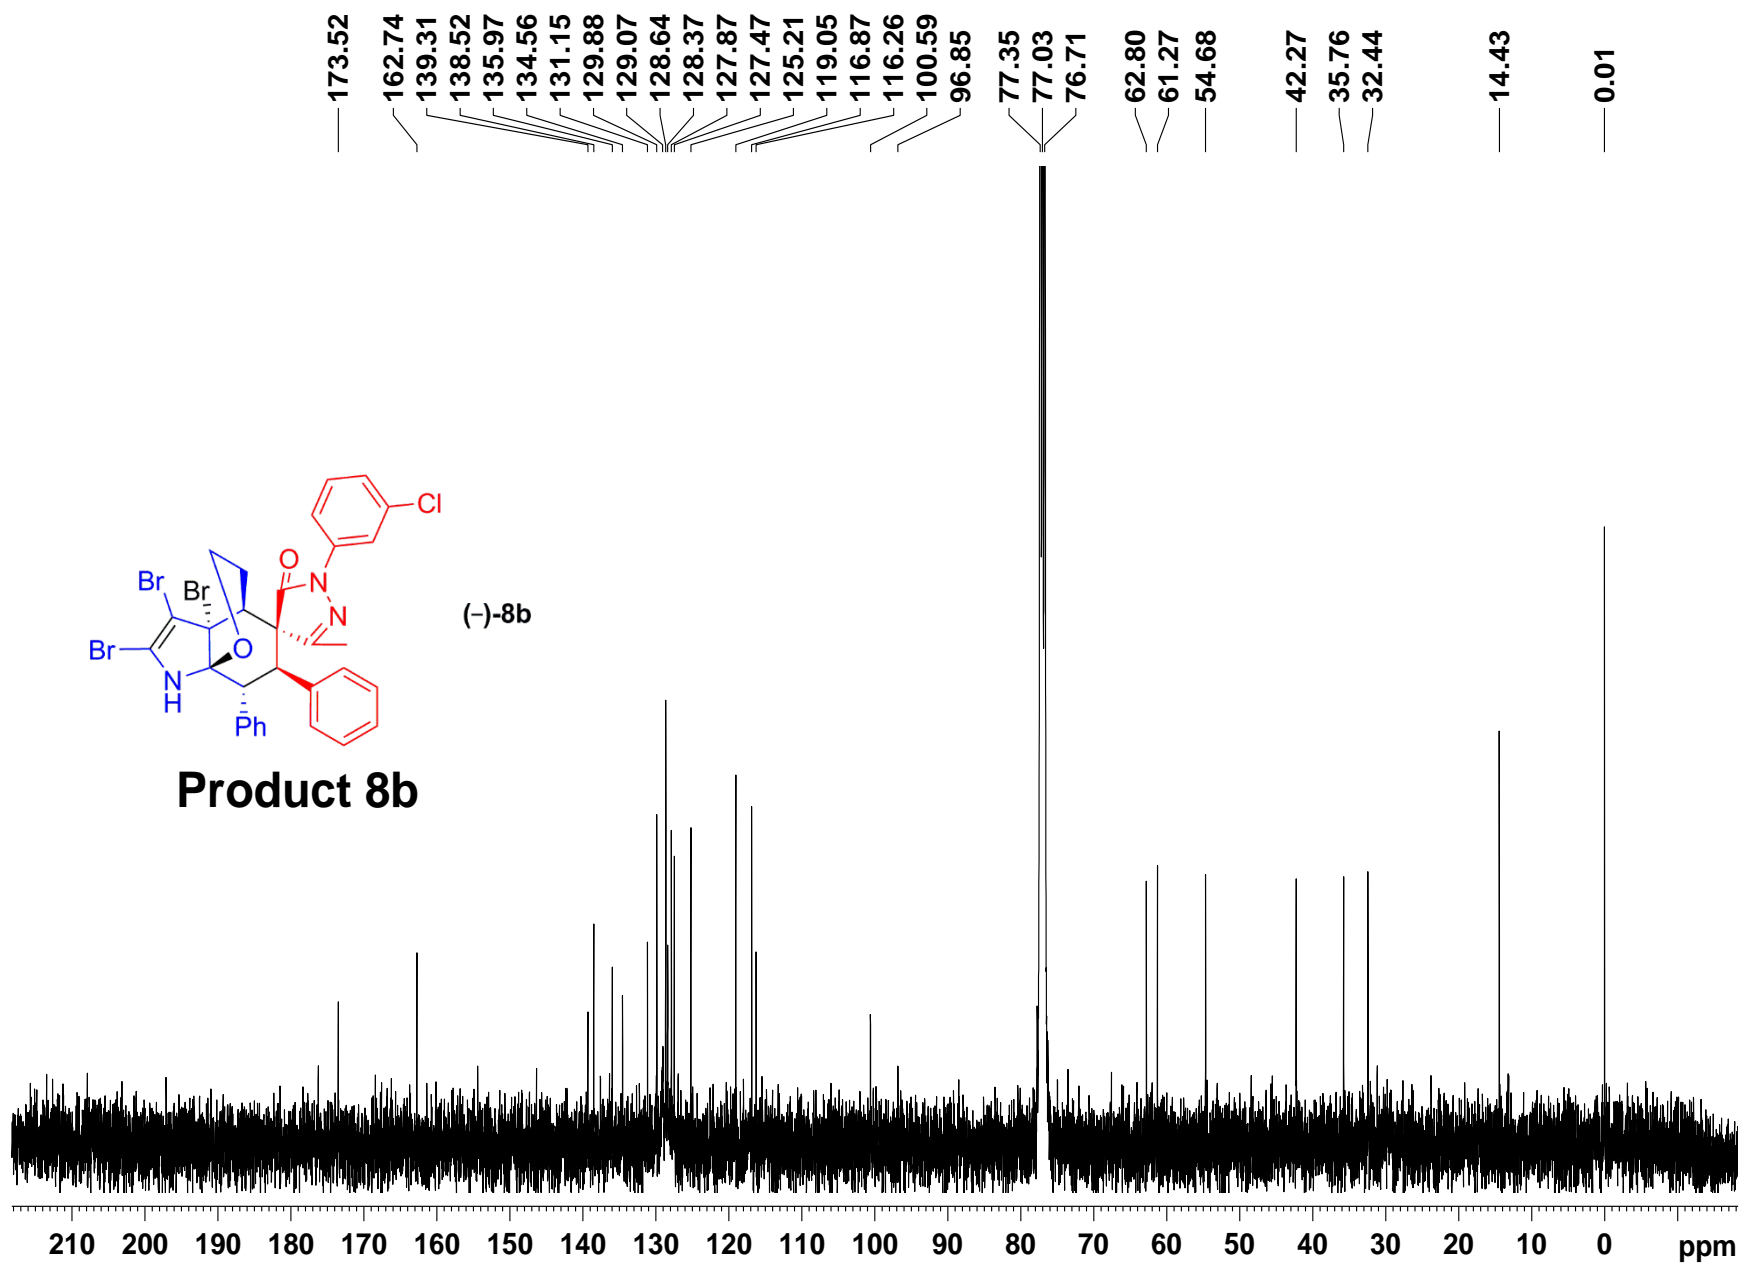

Supplement: d2ob02058k2.pdf [file d2ob02058k2.pdf]
