# Supplementary material for: El cortijo andaluz: : su origen, desarrollo y transformaciones recientes en la campiña de Córdoba
Source: Royal Society of Chemistry journal article supplement (doi:10.1039/d2ob02058k), 1989-01-01
Supplement: d2ob02058k1.pdf [file d2ob02058k1.pdf]

## Supporting Information-I

### Asymmetric synthesis of perhydroepoxyethanoindole cores *via* sequential [4+2]-addition/reduction/fluoroannulation reactions

Madavi S. Prasad,<sup>\*a</sup> and Murugesan Sivaprakash<sup>a</sup>

*Asymmetric Synthesis and Catalysis Laboratory, Department of Chemistry, Central University of Tamil Nadu, Thiruvavur, 610 005, India*

[shivaprasad@cutn.ac.in](mailto:shivaprasad@cutn.ac.in) and [shivacutn@gmail.com](mailto:shivacutn@gmail.com)

#### Table of Contents

---

|                                              |         |
|----------------------------------------------|---------|
| 1. General experimental procedures           | S2-S4   |
| 2. Characterization data for products        | S5-S22  |
| 3. Single Crystal X-ray data for compound 6i | S23-S24 |

## 1. EXPERIMENTAL SECTION

### 1.1 General Experimental Procedures

*Nuclear Magnetic Resonance Spectroscopy:*  $^1\text{H}$  NMR spectra were acquired on Bruker AVIII400 (400 MHz) spectrometer and were referenced to TMS and residual non-deuterated solvent peak in  $\text{CDCl}_3$  ( $\delta = 7.26$ ). Chemical shifts ( $\delta\text{H}$  and  $\delta\text{C}$ ) are reported in parts per million (ppm), with signal splitting recorded as singlet (s), doublet (d), triplet (t), quartet (q), quintet (quint), and multiplet and unresolved peaks (m). Coupling constants ( $J$ ) are mentioned in Hz and are presented as observed.  $^{13}\text{C}$  NMR spectra were obtained on Bruker AVIII400 (100 MHz) spectrometers and were referenced to solvent peaks in  $\text{CDCl}_3$  ( $\delta = 77.0$ ). Where diastereomeric mixtures are formed, data is given for the major diastereomer.

*Mass Spectrometry:* High-resolution mass spectra (HRMS) were recorded by the Thermo Fisher spectrometer using electrospray ionization (ESI<sup>+</sup>). The parent ion  $[\text{M}+\text{H}]^+$   $[\text{M}+\text{Na}]^+$  is calculated to 4 decimal places from the molecular formula, and all values are within a tolerance of 5 ppm.

*Specific rotations:* Optical rotations were recorded on an Anton Parr MCP100 polarimeter with a path length of 1 dm (using the sodium D line, 589 nm). Specific rotations ( $[\alpha]_D$ ) are reported in units of  $10^{-1}$  deg  $\text{cm}^2 \text{g}^{-1}$ . Concentrations are reported in g/mL. Temperatures are reported at  $^\circ\text{C}$  (typically  $25^\circ\text{C}$ ).

*Infrared Spectroscopy:* Absorption spectra were obtained on a Shimadzu FT-IR spectrometer. Wavelengths of maximum absorbance ( $\nu_{\text{max}}$ ) are quoted in wavenumbers ( $\text{cm}^{-1}$ ). Only selected characteristic IR absorption data are provided for each compound.

*High-Performance Liquid Chromatography:* Chromatograms were obtained using Shimadzu UFLC SPD-M20A with a prominence diode array detector on a selected 254nm channel.

*Single Crystal XRD:* Data was collected from the Sophisticated Analytical Instrumental Facility, Indian Institute of Technology Madras- Chennai.

#### Materials:

Unless otherwise stated, all reactions were carried out in oven-dried glassware using anhydrous reaction solvents. All other commercially available reagents and solvents were either used as received and/or dried and purified before use using standard procedures.

#### General Procedure A: Preparation of pyrrolidine-tethered dienals

**1a-c** were prepared by following the reported literature procedure.<sup>1</sup>

**General Procedure B: Preparation of pyrazolone enophiles**

**2a-2y** were synthesized using a literature report.<sup>2</sup>

**General Procedure C: [4+2]-addition/reduction and fluoroannulation reaction:**

To an oven oven-dried glass vial catalyst D-DPPOTMS (0.2 equiv.), benzoic acid (0.2 equiv.) and the pyrrolidine exocyclicdienal **1** (1.2 equiv.) in toluene (0.67 M) were stirred for 10 minutes. Then the olefinic pyrazolone **2** (1.0 equiv.) was added, and the resulting mixture was stirred at ambient temperature for 5 to 12 hours; after completion of the reaction monitored by TLC, methanol (0.025 M), and NaBH<sub>4</sub> (1.5 equiv.) were added at 0° C. After the reduction (5 to 10 min), the mixture was quenched with saturated NaHCO<sub>3</sub>, extracted using EtOAc, and concentrated at reduced pressure. Further, the crude product without column purification was reacted with selectfluor (2.0 equiv.) and NaHCO<sub>3</sub> in acetone (0.1 M) for 1 hour at ambient temperature. The final crude product obtained was purified by column chromatography using silica gel 100-200 mesh and ethylacetate/ hexane (4:6) as stationary and mobile faces, respectively.

**General Procedure D: [4+2]-addition/reduction and desosylative aromatization:**

To an oven oven-dried glass vial catalyst D-DPPOTMS (0.2 equiv.), benzoic acid (0.2 equiv.) and the pyrrolidine exocyclicdienal **1** (1.2 equiv.) in toluene (0.67 M) were stirred for 10 minutes. Then the olefinic pyrazolone **2** (1.0 equiv.) was added, and the resulting mixture was stirred at ambient temperature for 5 to 12 hours; after completion of the reaction monitored by TLC, methanol (0.025 M), and NaBH<sub>4</sub> (1.5 equiv.) were added at 0° C. After the reduction (5 to 10 min), the mixture was quenched with saturated NaHCO<sub>3</sub>, extracted using EtOAc, and concentrated at reduced pressure. Further, the crude product without column purification was reacted with NBS (2.0 equiv.) in acetone (0.1 M) for 15 min at 0°C.

**General Procedure E: [4+2]-addition/reduction and desosylative bromoannulation reaction:**

To an oven oven-dried glass vial catalyst D-DPPOTMS (0.2 equiv.), benzoic acid (0.2 equiv.) and the pyrrolidine exocyclicdienal **1** (1.2 equiv.) in toluene (0.67 M) were stirred for 10 minutes. Then the olefinic pyrazolone **2** (1.0 equiv.) was added, and the resulting mixture was stirred at ambient temperature for 5 to 12 hours; after completion of the reaction monitored by TLC, methanol (0.025 M), and NaBH<sub>4</sub> (1.5 equiv.) were added at 0° C. After the reduction (5 to 10 min), the mixture was quenched with saturated NaHCO<sub>3</sub>, extracted using EtOAc, and concentrated at reduced pressure. Further, the crude product without column purification was reacted with NBS (2.0 equiv.) in acetone (0.1 M) for 5 min at ambient temperature. The final crude product obtained was purified by flash column chromatography using silica gel 100-200 mesh and ethylacetate/ hexane (3:7) as stationary and mobile faces, respectively.

temperature. The final crude product obtained was purified by flash column chromatography using silica gel 100-200 mesh and ethylacetate/hexane (3:7) as stationary and mobile phases, respectively.

## References

- 1) a) D. C. Braddock, R. Bhuvu, D. S. Millan, Y. Perez-Fuertes, C. A. Roberts, R. N. Shepperd, S. Solanki, E. S. E. Stokes, A. J. P. White, *Org. Lett.* 2007, **9**, 3, 445-448. b) V. Chintalapudi, E. A. Galvin, R. L. Greenaway, E. A. Anderson, *Chem. Commun.*, 2016, **52**, 693. c) A. Mekareeya, P. R. Walker, A. Couce-Rios, C. D. Campbell, A. Steven, R. S. Paton, E. A. Anderson, *J. Am. Chem. Soc.*, 2017, **139**, 10104–10114. d) M. S. Prasad, M. Sivaprakash, and A. Palanichamy, *Org. Biomol. Chem.*, 2022, **20**, 6329–6333.
- 2) Y. Zhou, N. Chen, Y. Cheng, X. Cai, *J. Vis. Exp.*, 2019, **144**, 59155.

**(4R,5R,6R,7R)-4-(2-hydroxyethyl)-3'-methyl-1',6,7-triphenyl-1-tosyl-1,2,3,4,6,7-hexahydrospiro[indole-5,4'-pyrazol]-5'(1'H)-one (4a):**

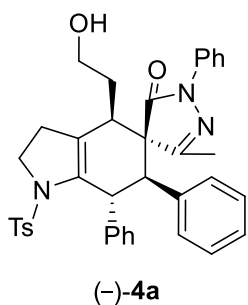

Prepared by following general procedure **C** intermediate, purified by column chromatography using EtOAc/hexane and isolated product **4a** in 90% yield as a white solid with **M. P.** 160-164 °C.  $[\alpha]_D^{25} = -140.804$  (CHCl<sub>3</sub>, c = 0.34 g/100mL); IR (neat)  $\nu_{\max}$  3495, 2924, 1697, 1496, 1157 and 686. cm<sup>-1</sup>; <sup>1</sup>H NMR (400 MHz, CDCl<sub>3</sub>)  $\delta$  8.19 (2H, d, *J* = 8.2 Hz), 7.80 (2H, d, *J* = 7.6 Hz), 7.41 (2H, t, *J* = 7.6 Hz), 7.32 (2H, d, *J* = 8.0 Hz), 7.23-7.19 (1H, m), 7.09-6.97 (7H, m), 6.9-6.86 (3H, m), 4.82-4.80 (1H, m), 3.70-3.68 (1H, m), 3.63-3.55 (1H, m), 3.52-3.36 (2H, m), 3.24 (1H, br s), 3.07 (1H, d, *J* = 10.5 Hz), 2.46 (3H, s), 2.04-1.98 (4H, m), 1.88-1.78 (1H, m), 1.49 (1H, m), 1.30-1.22 (1H, m); <sup>13</sup>C NMR (100 MHz, CDCl<sub>3</sub>, DEPT-135)  $\delta$  172.8 (C, N-C=O), 161.8 (C, C=N), 143.5 (C), 140.7(C), 139.3 (C), 137.8 (C), 136.9 (C), 134.5 (C), 129.3 (2CH), 128.8 (8CH), 128.4(C), 128.2 (CH), 127.7 (2CH), 127.6 (CH), 126.1 (CH), 125.2 (CH), 119.2 (3CH), 61.8 (C), 60.0 (CH<sub>2</sub>) 56.3 (CH), 49.8 (CH<sub>2</sub>), 44.6 (CH), 36.0 (CH), 31.6 (CH<sub>2</sub>), 30.7 (CH<sub>2</sub>), 21.7 (CH<sub>3</sub>), 14.0 (CH<sub>3</sub>); HRMS (ESI) *m/z*: 654.2397 [M + Na]<sup>+</sup>, calcd for C<sub>38</sub>H<sub>37</sub>N<sub>3</sub>O<sub>4</sub>SNa; Found 654.2376.

**(3a'R,4S,4'S,6'R,7'R,7a'R)-3a'-fluoro-3-methyl-1,6',7'-triphenyl-1'-tosyl-2',3',3a',4',6',7'-hexahydro-1'H-spiro[pyrazole-4,5'-[7a,4](epoxyethano)indol]-5(1H)-one (6a):**

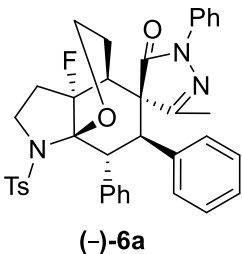

Prepared by following general procedure **C** purified by column chromatography using EtOAc/hexane and isolated product **6a** in 67% yield as a white solid with **M. P.** 95 - 100 °C. The enantiomeric excess (*ee*) was determined by chiral stationary phase **HPLC** using a Daicel Chiralpak IC column (hexane/EtOAc = 70:30, flow rate 0.5 mL/min,  $\lambda$  = 254 nm), *t<sub>R</sub>* = 19.388 min (major), *t<sub>R</sub>* = 30.762 min (minor),  $[\alpha]_D^{25} = -129.429$  (CHCl<sub>3</sub>, c = 0.4 g/100ml for 93% *ee*); IR (neat)  $\nu_{\max}$  2924, 1705, 1597, 1496, 1342 and 1159 cm<sup>-1</sup>; <sup>1</sup>H NMR (400 MHz, CDCl<sub>3</sub>)  $\delta$  7.27-7.26 (1H, m), 7.24-7.16 (6H, m), 7.07-6.95 (12H, m), 4.84 (1H, sept, *J* = 4 Hz), 4.59 (1H, d, *J* = 11.6 Hz), 3.84-3.76 (3H, m), 3.50 (1H, sext, *J* = 4 Hz), 2.84-2.81 (1H, m), 2.79-2.62 (1H, m), 2.34 (3H, s), 2.32 (3H, d, *J* = 5.12 Hz), 2.23-2.21 (1H, m), 2.18-2.09 (1H, m), 2.03-1.93 (1H, m); <sup>13</sup>C NMR (100 MHz, CDCl<sub>3</sub>, DEPT-135)  $\delta$  171.9 (C, N-C=O), 162.1 (C, C=N), 143.0 (C), 142.2 (C), 136.9 (C), 136.6 (C), 135.7 (C), 131.1 (CH), 129.9 (CH), 128.9 (2CH), 128.4 (2CH), 128.2 (2CH), 127.7 (2CH), 127.5 (CH), 127.4 (2CH), 125.8 (CH), 125.3 (CH), 120.0 (3CH), 108.4 (C, d, *J* = 187.51 Hz), 97.0 (C, d, *J* = 19.9 Hz), 62.4 (C), 59.7 (CH<sub>2</sub>), 54.6 (CH), 51.5 (CH, d, *J* = 9.82 Hz), 47.1 (CH<sub>2</sub>), 36.2 (CH, C-F, d, *J* = 17.9 Hz), 31.5 (CH<sub>2</sub>, d, *J* = 26.4 Hz), 28.5 (CH<sub>2</sub>, d, *J* = 7.8 Hz), 21.6 (CH<sub>3</sub>), 14.1 (CH<sub>3</sub>, d, *J* = 4.0 Hz); <sup>19</sup>F NMR (376MHz, CDCl<sub>3</sub>)  $\delta$  -146.67; HRMS (ESI) *m/z*: 672.23028 [M + Na]<sup>+</sup>, calcd. for C<sub>38</sub>H<sub>36</sub>N<sub>3</sub>O<sub>4</sub>SFNa; Found 672.23029.

**(3a'R,4S,4'S,6'R,7'R,7a'R)-3a'-fluoro-6'-(3-fluorophenyl)-3-methyl-1,7'-diphenyl-1'-tosyl-2',3',3a',4',6',7'-hexahydro-1'H-spiro[pyrazole-4,5'-[7a,4](epoxyethano)indol]-5(1H)-one (6b):**

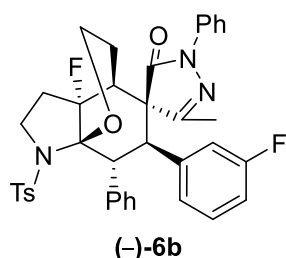

Prepared by following general procedure **C** purified by column chromatography using EtOAc/hexane and isolated product **6b** in 65% yield as a white solid with **M. P.** 135 - 138 °C. The enantiomeric excess (*ee*) was determined by chiral stationary phase **HPLC** using a Daicel Chiralpak IC column (hexane/EtOAc = 65:35, flow rate 0.5 mL/min,  $\lambda$  = 254 nm),  $t_R$  = 13.630 min (major),  $t_R$  = 17.696 min (minor),  $[\alpha]_D^{25}$  = -73.538 (CHCl<sub>3</sub>, *c* = 0.7 g/100ml for 93% *ee*); **IR (neat)**  $\nu_{\max}$  2924, 1705, 1589, 1496, 1157 and 663 cm<sup>-1</sup>; **<sup>1</sup>H NMR (400 MHz, CDCl<sub>3</sub>)**  $\delta$  7.35 – 7.33 (3H, m), 7.24 – 7.22 (2H, m), 7.18 - 7.16 (2H, m), 7.09 - 7.08 (7H, m), 6.95 - 6.87 (3H, m), 6.75 – 6.66 (1H, m), 4.82 – 4.75 (1H, m), 4.53 (1H, d, *J* = 11.5 Hz), 3.84 - 3.73 (3H, m), 3.53 – 3.47 (1H, m), 2.84 – 2.60 (2H, m), 2.34 (3H, s), 2.30 (3H, d, *J* = 4.8 Hz), 2.25 – 2.10 (2H, m), 2.03 - 1.95 (1H, m); **<sup>13</sup>C NMR (100 MHz, CDCl<sub>3</sub>, DEPT-135)**  $\delta$  171.8 (C, N-C=O), 162.0 (C-F, d, *J* = 244 Hz), 161.9 (C, C=N), 143.1 (C), 141.9 (C), 138.5 (C, d, *J* = 6 Hz), 136.9 (C), 136.6 (C), 131.1 (CH), 129.1 (CH, d, *J* = 8 Hz), 128.9 (2CH), 128.6 (3CH), 128.2 (2CH), 127.6 (2CH), 126.0 (CH), 125.6 (CH), 125.4 (CH), 119.7 (2CH), 116.8 (CH, d, *J* = 21 Hz), 114.5 (CH, d, *J* = 21 Hz), 104.4 (C), 102.6 (C), 96.9 (C, d, *J* = 19 Hz), 62.3 (C), 59.6 (CH<sub>2</sub>), 54.9 (CH), 51.2 (CH, d, *J* = 10 Hz), 47.2 (CH<sub>2</sub>), 36.3 (CH, d, *J* = 18 Hz), 31.5 (CH<sub>2</sub>, d, *J* = 26 Hz), 28.5 (CH<sub>2</sub>, d, *J* = 7 Hz), 21.5 (CH<sub>3</sub>), 15.3 (CH<sub>3</sub>, d, *J* = 9 Hz); **<sup>19</sup>F NMR (376MHz, CDCl<sub>3</sub>)**  $\delta$  -113.41, -146.50; **HRMS (ESI)** *m/z*: 668.23891 [M + H]<sup>+</sup>, calcd. for C<sub>38</sub>H<sub>36</sub>N<sub>3</sub>O<sub>4</sub>SF<sub>2</sub>; Found 668.23885.

**(3a'R,4S,4'S,6'R,7'R,7a'R)-3a'-fluoro-6'-(4-fluorophenyl)-3-methyl-1,7'-diphenyl-1'-tosyl-2',3',3a',4',6',7'-hexahydro-1'H-spiro[pyrazole-4,5'-[7a,4](epoxyethano)indol]-5(1H)-one (6c):**

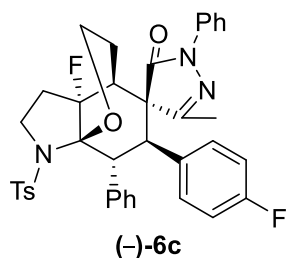

Prepared by following general procedure **C** purified by column chromatography using EtOAc/hexane and isolated product **6c** in 63% yield as a white solid with **M. P.** 121 - 124 °C. The enantiomeric excess (*ee*) was determined by chiral stationary phase **HPLC** using a Daicel Chiralpak IC column (hexane/EtOAc = 65:35, flow rate 0.5 mL/min,  $\lambda$  = 254 nm),  $t_R$  = 13.540 min (major),  $t_R$  = 17.999 min (minor),  $[\alpha]_D^{25}$  = -105.826 (CHCl<sub>3</sub>, *c* = 0.17 g/100ml for 91% *ee*); **IR (neat)**  $\nu_{\max}$  2924, 1705, 1365, 1157, 756 and 663 cm<sup>-1</sup>; **<sup>1</sup>H NMR (400 MHz, CDCl<sub>3</sub>)**  $\delta$  7.32 (2H, d, *J* = 8 Hz), 7.23 (2H, d, *J* = 8.4 Hz), 7.17-7.15 (3H, m), 7.11-7.08 (8H, m), 6.91-6.67 (3H, m), 4.81 (1H, sept, *J* = 4.8 Hz), 4.52 (1H, d, *J* = 11.6 Hz), 3.89-3.71 (3H, m), 3.50 (1H, sext, *J* = 6.4 Hz), 2.83 (1H, br m), 2.72 (1H, dq, *J* = 10.4, 10.4 Hz), 2.35 (3H, s), 2.31 (3H, d, *J* = 4.8 Hz), 2.14 (1H, t, *J* = 4.8 Hz), 2.05-1.95 (2H, m); **<sup>13</sup>C NMR (100 MHz, CDCl<sub>3</sub>, DEPT-135)**  $\delta$  171.9 (C, N-C=O), 162.0 (C, C=N), 161.9 (C, d, *J* = 245 Hz), 143.1 (C), 142.0 (C), 136.9 (C), 136.6 (C), 131.5 (C, d, *J* = 8 Hz), 131.1 (CH), 128.9 (3CH), 128.6 (3CH), 128.2 (2CH), 127.6 (2CH), 125.7 (2CH, d, *J* = 44 Hz), 119.7 (3CH), 114.6 (2CH, d, *J* = 21 Hz), 103.4 (C, d, *J* = 186 Hz), 96.9 (C, d, *J* = 19 Hz), 62.4 (C), 59.6 (CH<sub>2</sub>), 55.0

(CH), 50.8 (CH,  $d, J = 10$  Hz), 47.2 (CH<sub>2</sub>), 36.2 (CH,  $d, J = 18$  Hz), 31.5 (CH<sub>2</sub>,  $d, J = 26$  Hz), 28.5 (CH<sub>2</sub>,  $d, J = 8$  Hz), 21.5 (CH<sub>3</sub>), 15.3 (CH<sub>3</sub>,  $d, J = 9$  Hz); **<sup>19</sup>F NMR (376MHz, CDCl<sub>3</sub>)**  $\delta$  -114.67, -146.56; **HRMS (ESI)**  $m/z$ : 690.2209 [M + Na]<sup>+</sup>, calcd. for C<sub>38</sub>H<sub>35</sub>N<sub>3</sub>O<sub>4</sub>SF<sub>2</sub>Na; Found 690.2221.

**(3a'R,4S,4'S,6'S,7'R,7a'R)-6'-(2-chlorophenyl)-3a'-fluoro-3-methyl-1,7'-diphenyl-1'-tosyl-2',3',3a',4',6',7'-hexahydro-1'H-spiro[pyrazole-4,5'-[7a,4](epoxyethano)indol]-5(1H)-one (6d):**

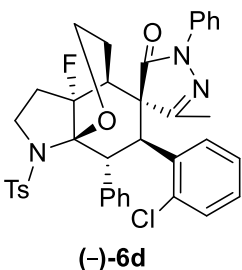

Prepared by following general procedure **C** purified by column chromatography using EtOAc/hexane and isolated product **6d** in 58% yield as a yellow solid with **M. P.** 135 - 138 °C. The enantiomeric excess (*ee*) was determined by chiral stationary phase **HPLC** using a Daicel Chiralpak IC column (hexane/EtOAc = 65:35, flow rate 0.5 mL/min,  $\lambda = 254$  nm),  $t_R = 13.755$  min (major),  $t_R = 17.346$  min (minor),  $[\alpha]_D^{25} = -101.445$  (CHCl<sub>3</sub>,  $c = 0.33$  g/100ml for 88% *ee*); **IR (neat)**  $\nu_{max}$  2924, 1705, 1342, 1157, 1033 and 748 cm<sup>-1</sup>; **<sup>1</sup>H NMR (400 MHz, CDCl<sub>3</sub>)**  $\delta$  7.99

(1H,  $d, J = 8$  Hz), 7.33 (1H,  $d, J = 8$  Hz), 7.22 (3H,  $t, J = 7.8$  Hz), 7.12 – 7.00 (10H,  $m$ ), 6.95 – 6.90 (2H,  $m$ ), 4.94 – 4.87 (1H,  $m$ ), 4.61 (1H,  $dd, J = 4.9, 11.4$  Hz), 4.40 (1H,  $d, J = 11.4$  Hz), 3.89-3.82 (2H,  $m$ ), 3.53 – 3.47 (1H,  $m$ ), 2.88-2.69 (2H,  $m$ ), 2.36 (3H,  $d, J = 5.8$  Hz), 2.34 (3H,  $s$ ), 2.26 - 2.11 (2H,  $m$ ), 2.04 – 1.96 (1H,  $m$ ); **<sup>13</sup>C NMR (100 MHz, CDCl<sub>3</sub>, DEPT-135)**  $\delta$  171.9 (C, N-C=O), 162.9 (C, C=N), 143.0 (C), 141.1 (C), 136.9 (C), 136.6 (C), 135.1 (C), 134.6 (C), 132.5 (CH), 131.3 (CH), 128.9 (2CH), 128.7 (CH), 128.6 (CH), 128.5 (3CH), 128.2 (2CH), 127.3 (2CH), 126.1 (CH), 125.9 (CH), 125.4 (CH), 119.8 (2CH), 102.9 (C-F,  $d, J = 187$  Hz), 96.7 (C-O,  $d, J = 20$  Hz), 61.5 (C), 60.0 (CH<sub>2</sub>), 56.6 (CH), 47.2 (CH<sub>2</sub>), 45.8 (CH,  $d, J = 10$  Hz), 36.5 (CH,  $d, J = 10$  Hz), 31.5 (CH<sub>2</sub>,  $d, J = 25$  Hz), 28.2 (CH<sub>2</sub>,  $d, J = 8$  Hz), 21.5 (CH<sub>3</sub>), 16.8 (CH<sub>3</sub>,  $d, J = 11$  Hz); **<sup>19</sup>F NMR (376MHz, CDCl<sub>3</sub>)**  $\delta$  -147.53; **HRMS (ESI)**  $m/z$ : 706.19130 [M + Na]<sup>+</sup>, calcd. for C<sub>38</sub>H<sub>35</sub>N<sub>3</sub>O<sub>4</sub>ClSFNa; Found 706.19236.

**(3a'R,4S,4'S,6'R,7'R,7a'R)-6'-(3-chlorophenyl)-3a'-fluoro-3-methyl-1,7'-diphenyl-1'-tosyl-2',3',3a',4',6',7'-hexahydro-1'H-spiro[pyrazole-4,5'-[7a,4](epoxyethano)indol]-5(1H)-one (6e):**

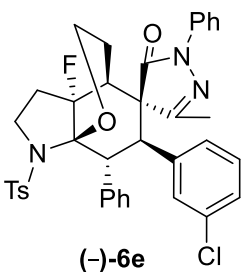

Prepared by following general procedure **C** purified by column chromatography using EtOAc/hexane and isolated product **6e** in 67% yield as a yellow solid with **M. P.** 111 - 114 °C. The enantiomeric excess (*ee*) was determined by chiral stationary phase **HPLC** using a Daicel Chiralpak IC column (hexane/EtOAc = 65:35, flow rate 0.5 mL/min,  $\lambda = 254$  nm),  $t_R = 13.734$  min (major),  $t_R = 18.601$  min (minor),  $[\alpha]_D^{25} = -102.835$  (CHCl<sub>3</sub>,  $c = 0.24$  g/100ml for 92% *ee*); **IR (neat)**  $\nu_{max}$  2916, 1705, 1458, 1157, 1087 and 756 cm<sup>-1</sup>; **<sup>1</sup>H NMR (400 MHz, CDCl<sub>3</sub>)**  $\delta$  7.30 –

7.27 (3H,  $m$ ), 7.25 – 7.23 (2H,  $m$ ), 7.16 – 7.03 (13H,  $m$ ), 4.82 – 4.75 (1H,  $m$ ), 4.51 (1H,  $d, J = 11.6$  Hz), 3.84 – 3.75 (3H,  $m$ ), 3.53 - 3.46 (1H,  $m$ ), 2.84 – 2.82 (1H,  $m$ ), 2.78 - 2.61 (1H,  $m$ ), 2.34 (3H,  $s$ ), 2.30 (3H,  $d, J = 4.9$  Hz), 2.24 - 2.21 (1H,  $m$ ), 2.19 – 2.09 (1H,  $m$ ), 2.03 – 1.96 (1H,  $m$ ); **<sup>13</sup>C NMR (100 MHz, CDCl<sub>3</sub>, DEPT-135)**  $\delta$  171.9 (C, N-C=O), 161.9 (C, C=N), 143.1 (C), 141.9 (C), 136.9 (C), 136.6 (C), 134.6 (C), 133.3 (C), 131.2 (2CH), 131.0 (CH), 128.9 (2CH), 128.6 (2CH), 128.2 (2CH), 127.9 (2CH), 127.7 (2CH),

126.0 (CH), 125.6 (CH), 119.9 (3CH), 103.5 (C-F,  $d, J = 186$  Hz), 96.9 (C-O,  $d, J = 20$  Hz), 62.4 (C), 59.6 (CH<sub>2</sub>), 54.8 (CH), 50.9 (CH,  $d, J = 10$  Hz), 47.2 (CH<sub>2</sub>), 36.3 (CH,  $d, J = 18$  Hz), 31.5 (CH<sub>2</sub>,  $d, J = 26$  Hz), 28.6 (CH<sub>2</sub>,  $d, J = 8$  Hz), 21.5 (CH<sub>3</sub>), 15.3 (CH<sub>3</sub>,  $d, J = 9$  Hz); **<sup>19</sup>F NMR (376MHz, CDCl<sub>3</sub>)**  $\delta$  -146.52; **HRMS (ESI)**  $m/z$ : 706.19130 [M + Na]<sup>+</sup>, calcd. for C<sub>38</sub>H<sub>35</sub>N<sub>3</sub>O<sub>4</sub>ClSFNa; Found 706.19245.

**(3a'R,4S,4'S,6'R,7'R,7a'R)-6'-(4-chlorophenyl)-3a'-fluoro-3-methyl-1,7'-diphenyl-1'-tosyl-2',3',3a',4',6',7'-hexahydro-1'H-spiro[pyrazole-4,5'-[7a,4](epoxyethano)indol]-5(1H)-one (6f):**

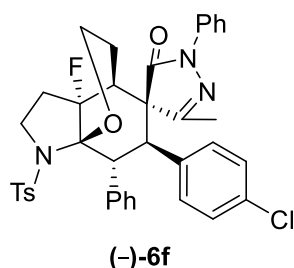

Prepared by following general procedure **C** purified by column chromatography using EtOAc/hexane and isolated product **6f** in 63% yield as a white solid with **M. P.** 134 - 137 °C. The enantiomeric excess (*ee*) was determined by chiral stationary phase **HPLC** using a Daicel Chiralpak IC column (hexane/EtOAc = 65:35, flow rate 0.5 mL/min,  $\lambda = 254$  nm),  $t_R = 13.598$  min (major),  $t_R = 18.270$  min (minor),  $[\alpha]_D^{25} = -86.136$  (CHCl<sub>3</sub>,  $c = 0.27$  g/100ml for 95% *ee*); **IR (neat)**  $\nu_{\max}$  2924, 1705, 1496, 1157, 1087 and 756 cm<sup>-1</sup>; **<sup>1</sup>H NMR (400 MHz, CDCl<sub>3</sub>)**  $\delta$  7.30-7.28 (3H, m), 7.16-6.97 (15H, m), 4.82-4.75 (1H, m), 4.51 (1H,  $d, J = 11.6$  Hz), 3.86 - 3.75 (3H, m), 3.53-3.46 (1H, m), 2.83-2.82 (1H, m), 2.78-2.61 (1H, m), 2.34 (3H, s), 2.30 (3H,  $d, J = 4.9$  Hz), 2.25-2.21 (1H, m), 2.15-2.13 (1H, m), 2.04 - 1.99 (1H, m). **<sup>13</sup>C NMR (100 MHz, CDCl<sub>3</sub>, DEPT-135)**  $\delta$  171.8 (C, N-C=O), 161.9 (C, C=N), 143.1 (C), 141.9 (C), 136.9 (C), 136.6 (C), 134.5 (C), 133.3 (C), 131.2 (2CH), 131.0 (CH), 128.9 (2CH), 128.6 (3CH), 128.2 (2CH), 127.9 (2CH), 127.7 (2CH), 126.0 (CH), 125.6 (CH), 119.9 (2CH), 103.5 (C-F,  $d, J = 187$  Hz), 96.9 (C-O,  $d, J = 20$  Hz), 62.4 (C), 59.6 (CH<sub>2</sub>), 54.8 (CH), 50.9 (CH,  $d, J = 10$  Hz), 47.2 (CH<sub>2</sub>), 36.3 (CH<sub>2</sub>,  $d, J = 26$  Hz), 28.6 (CH<sub>2</sub>,  $d, J = 8$  Hz), 21.5 (CH<sub>3</sub>), 15.3 (CH<sub>3</sub>,  $d, J = 9$  Hz); **<sup>19</sup>F NMR (376MHz, CDCl<sub>3</sub>)**  $\delta$  -146.53; **HRMS (ESI)**  $m/z$ : 706.19130 [M + Na]<sup>+</sup>, calcd. for C<sub>38</sub>H<sub>35</sub>O<sub>4</sub>N<sub>3</sub>ClFNaS; Found 706.19334.

**(3a'R,4S,4'S,6'S,7'R,7a'R)-6'-(2-bromophenyl)-3a'-fluoro-3-methyl-1,7'-diphenyl-1'-tosyl-2',3',3a',4',6',7'-hexahydro-1'H-spiro[pyrazole-4,5'-[7a,4](epoxyethano)indol]-5(1H)-one (6g):**

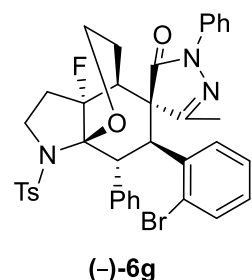

Prepared by following general procedure **C** purified by column chromatography using EtOAc/hexane and isolated product **6g** in 54% yield as a yellow solid with **M. P.** 225 - 227 °C. The enantiomeric excess (*ee*) was determined by chiral stationary phase **HPLC** using a Daicel Chiralpak IC column (hexane/EtOAc = 65:35, flow rate 0.5 mL/min,  $\lambda = 254$  nm),  $t_R = 13.997$  min (major),  $t_R = 17.623$  min (minor),  $[\alpha]_D^{25} = -140.994$  (CHCl<sub>3</sub>,  $c = 0.25$  g/100ml for 92% *ee*); **IR (neat)**  $\nu_{\max}$  2924, 1705, 1342, 1157, 1087 and 748 cm<sup>-1</sup>; **<sup>1</sup>H NMR (400 MHz, CDCl<sub>3</sub>)**  $\delta$  8.0 (1H,  $d, J = 7.8$  Hz), 7.33 (2H,  $d, J = 8.1$  Hz), 7.24 - 7.20 (3H, m), 7.12 - 7.05 (1H, m), 6.85 (1H,  $t, J = 7.3$  Hz), 4.91 - 4.84 (1H, m), 4.53 (1H,  $dd, J = 5.1, 11.3$  Hz), 4.37 (1H,  $d, J = 11.2$  Hz), 3.87 - 3.82 (2H, m), 3.54 - 3.48 (1H, m), 2.85 - 2.68 (2H, m), 2.41 (3H,  $d, J = 5.8$  Hz), 2.34 (4H, s), 2.21 - 2.11 (1H, m), 2.02 - 1.98 (1H, m); **<sup>13</sup>C NMR (100 MHz, CDCl<sub>3</sub>, DEPT-135)**  $\delta$  171.9 (C, N-C=O), 162.8 (C, C=N), 143.0 (C),



140.9 (C), 136.9 (C), 136.6 (C), 136.5 (C), 132.8 (CH), 132.2 (CH), 131.4 (CH), 128.9 (CH), 128.9 (2CH), 128.5 (3CH), 128.2 (2CH), 127.3 (2CH), 126.7 (CH), 126.3 (C), 126.0 (CH), 125.3 (CH), 119.8 (2CH), 102.3 (C-F, d,  $J = 187$  Hz), 96.7 (C-O, d,  $J = 20$  Hz), 61.4 (C), 60.0 (CH<sub>2</sub>), 57.3 (CH), 48.5 (CH, d,  $J = 10$  Hz), 47.2 (CH<sub>2</sub>), 36.4 (CH, d,  $J = 17$  Hz), 31.5 (CH<sub>2</sub>, d,  $J = 26$  Hz), 28.1 (CH, d,  $J = 8$  Hz), 21.5 (CH<sub>3</sub>), 17.5 (CH<sub>3</sub>, d,  $J = 11$  Hz); <sup>19</sup>F NMR (376MHz, CDCl<sub>3</sub>)  $\delta$  -147.49; HRMS (ESI)  $m/z$ : 750.14079 [M + Na]<sup>+</sup>, calcd. for C<sub>38</sub>H<sub>35</sub>N<sub>3</sub>O<sub>4</sub>BrSFNa; Found 750.14014.

**(3a'R,4S,4'S,6'R,7'R,7a'R)-6'-(3-bromophenyl)-3a'-fluoro-3-methyl-1,7'-diphenyl-1'-tosyl-2',3',3a',4',6',7'-hexahydro-1'H-spiro[pyrazole-4,5'-[7a,4](epoxyethano)indol]-5(1H)-one (6h):**

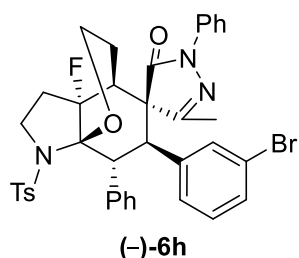

Prepared by following general procedure **C** purified by column chromatography using EtOAc/hexane and isolated product **6h** in 66% yield as a yellow solid with **M. P.** 201 - 204 °C. The enantiomeric excess (*ee*) was determined by chiral stationary phase **HPLC** using a Daicel Chiralpak IC column (hexane/EtOAc = 65:35, flow rate 0.5 mL/min,  $\lambda = 254$  nm),  $t_R = 13.637$  min (major),  $t_R = 17.746$  min (minor),  $[\alpha]_D^{25} = -86.972$  (CHCl<sub>3</sub>,  $c = 0.29$  g/100ml for 91% *ee*); **IR (neat)**  $\nu_{\max}$  2924, 1705, 1496, 1342, 1157 and 748 cm<sup>-1</sup>; **<sup>1</sup>H NMR (400 MHz, CDCl<sub>3</sub>)**  $\delta$  7.35 (2H, d,  $J = 7.9$  Hz), 7.27 (1H, s), 7.25 - 7.23 (3H, m), 7.17 - 7.07 (11H, m), 6.91 - 6.87 (1H, m), 4.79 - 4.72 (1H, m), 4.52 (1H, d,  $J = 11.5$  Hz), 3.83 - 3.72 (3H, m), 3.54 - 3.48 (1H, m), 2.84 - 2.82 (1H, m), 2.79 - 2.59 (1H, m), 2.35 (3H, s), 2.30 (3H, d,  $J = 4.7$  Hz), 2.26 - 2.23 (1H, m), 2.19 - 2.10 (1H, m), 2.02 - 1.94 (1H, m). **<sup>13</sup>C NMR (100 MHz, CDCl<sub>3</sub>, DEPT-135)**  $\delta$  171.7 (C, N-C=O), 161.7 (C, C=N), 143.1 (C), 141.7 (C), 138.4 (C), 136.9 (C), 136.6 (C), 132.8 (C), 131.0 (CH), 130.7 (CH), 129.2 (CH), 128.9 (2CH), 128.5 (4CH), 128.2 (2CH), 127.7 (2CH), 126.1 (CH), 125.5 (CH), 119.7 (3CH), 103.6 (C-F, d,  $J = 187$  Hz), 96.9 (C-O, d,  $J = 19$  Hz), 62.3 (C), 59.5 (CH<sub>2</sub>), 54.9 (CH), 51.2 (CH, d,  $J = 10$  Hz), 47.1 (CH<sub>2</sub>), 36.2 (CH, d,  $J = 18$  Hz), 31.5 (CH<sub>2</sub>, d,  $J = 27$  Hz), 28.4 (CH<sub>2</sub>, d,  $J = 7$  Hz), 21.5 (CH<sub>3</sub>), 15.3 (CH<sub>3</sub>, d,  $J = 9$  Hz); <sup>19</sup>F NMR (376MHz, CDCl<sub>3</sub>)  $\delta$  -146.28 ; HRMS (ESI)  $m/z$ : 750.14079 [M + Na]<sup>+</sup>, calcd. for C<sub>38</sub>H<sub>35</sub>O<sub>4</sub>N<sub>3</sub>BrFNaS; Found 750.14083.

**(3a'R,4S,4'S,6'R,7'R,7a'R)-6'-(4-bromophenyl)-3a'-fluoro-3-methyl-1,7'-diphenyl-1'-tosyl-2',3',3a',4',6',7'-hexahydro-1'H-spiro[pyrazole-4,5'-[7a,4](epoxyethano)indol]-5(1H)-one (6i):**

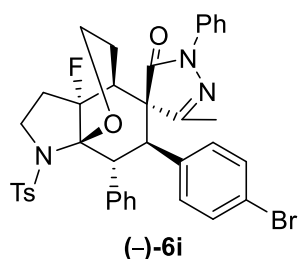

Prepared by following general procedure **C** purified by column chromatography using EtOAc/hexane and isolated product **6i** in 62% yield as a white solid with **M. P.** 204 - 207 °C. The enantiomeric excess (*ee*) was determined by chiral stationary phase **HPLC** using a Daicel Chiralpak IC column (hexane/EtOAc = 70:30, flow rate 0.5 mL/min,  $\lambda = 254$  nm),  $t_R = 18.073$  min (major),  $t_R = 29.955$  min (minor),  $[\alpha]_D^{25} = -138.142$  (CHCl<sub>3</sub>,  $c = 1.2$  g/100ml for 96% *ee*); **IR (neat)**  $\nu_{\max}$  2926, 1701, 1597, 1454, 1278 and 1159 cm<sup>-1</sup>; **<sup>1</sup>H NMR (400 MHz, CDCl<sub>3</sub>)**  $\delta$  7.29-7.25 (5H, m), 7.19-7.15 (4H, m), 7.13-7.04 (8H, m), 6.98 (1H, br s), 4.78 (1H, sept,  $J = 3.2$

Hz), 4.51 (1H, d,  $J = 11.6$  Hz), 3.84-3.73 (3H, m), 3.50 (1H, sext,  $J=6.56$  Hz), 2.85-2.80 (1H, m), 2.70 (1H, dq,  $J=13.2, 13.2$  Hz), 2.34 (3H, s), 2.30 (3H, d,  $J=4.88$ Hz), 2.25-2.09 (2H, m), 2.02-1.93 (1H, m).  $^{13}\text{C}$  NMR (100 MHz,  $\text{CDCl}_3$ , DEPT-135)  $\delta$  171.9 (C, N-C=O), 161.9 (C, C=N), 143.1 (C), 141.9 (C), 136.9 (C), 136.6 (C), 135.1 (C), 131.5 (CH), 131.1 (CH), 130.9 (2CH), 129.0 (2CH), 128.6 (3CH), 128.2 (2CH), 127.7 (2CH), 126.0 (CH), 125.6 (CH), 121.6 (C), 120.0 (3CH), 103.5 (C, d,  $J=186.4$ Hz), 96.9 (C, d,  $J=19.6$ Hz), 62.3 (C), 59.6 ( $\text{CH}_2$ ), 51.0 (CH, d,  $J=10$ Hz), 47.2 ( $\text{CH}_2$ ), 36.3 (CH, d,  $J=18$ Hz), 31.5 ( $\text{CH}_2$ , d,  $J=26.3$  Hz), 28.5 ( $\text{CH}_2$ , d,  $J=7.7$  Hz), 21.5 ( $\text{CH}_3$ ), 15.3 ( $\text{CH}_3$ , d,  $J= 8.7$ Hz);  $^{19}\text{F}$  NMR (376MHz,  $\text{CDCl}_3$ )  $\delta$  -146.48 ; HRMS (ESI)  $m/z$ : 750.1408  $[\text{M} + \text{Na}]^+$ , calcd. for  $\text{C}_{38}\text{H}_{35}\text{O}_4\text{N}_3\text{BrFNaS}$ ; Found 750.1409.

**(3a'R,4S,4'S,6'R,7'R,7a'R)-3a'-fluoro-3-methyl-1,7'-diphenyl-6'-(p-tolyl)-1'-tosyl-2',3',3a',4',6',7'-hexahydro-1'H-spiro[pyrazole-4,5'-[7a,4](epoxyethano)indol]-5(1H)-one (6j):**

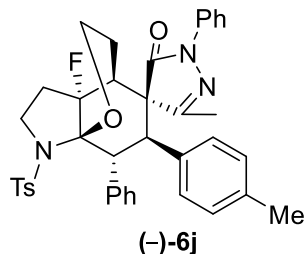

Prepared by following general procedure **C** purified by column chromatography using EtOAc/hexane and isolated product **6j** in 59% yield as a white solid with **M. P.** 127 - 130 °C. The enantiomeric excess (*ee*) was determined by chiral stationary phase HPLC using a Daicel Chiralpak IC column (hexane/EtOAc = 65:35, flow rate 0.5 mL/min,  $\lambda = 254$  nm),  $t_R = 14.454$  min (major),  $t_R = 20.768$  min (minor),  $[\alpha]_D^{25} = -97.591$  ( $\text{CHCl}_3$ ,  $c =$

0.18 g/100ml for 95% ee); IR (neat)  $\nu_{\text{max}}$  2924, 1705, 1597, 1365, 1157 and 756  $\text{cm}^{-1}$ ;  $^1\text{H}$  NMR (400 MHz,  $\text{CDCl}_3$ )  $\delta$  7.81 – 7.58 (1H, m), 7.33 – 7.30 (1H, m), 7.23 - 7.17 (5H, m), 7.07 - 6.91 (9H, m), 6.85 – 6.83 (2H, m), 4.85 – 4.79 (1H, m), 4.56 (1H, d,  $J = 11.5$  Hz), 3.83 - 3.73 (3H, m), 3.53 – 3.46 (1H, m), 2.81 - 2.61 (2H, m), 2.34 (3H, s), 2.30 (3H, d,  $J = 5$  Hz), 2.24 - 2.21 (1H, m), 2.17 - 2.11 (1H, m), 2.08 (3H, m), 2.00- 1.92 (1H, m).  $^{13}\text{C}$  NMR (100 MHz,  $\text{CDCl}_3$ , DEPT-135)  $\delta$  172.1 (C, N-C=O), 162.2 (C, C=N), 142.9 (C), 142.4 (C), 137.0 (2C), 136.7 (C), 132.6 (C), 131.0 (CH), 129.6 (2CH), 128.9 (2CH), 128.4 (4CH), 128.2 (2CH), 127.4 (2CH), 125.7 (CH), 125.4 (CH), 120.1 (3CH), 103.4 (C-F, d,  $J=186$  Hz), 97.1 (C-O, d,  $J = 19$  Hz), 62.5 (C), 59.7 ( $\text{CH}_2$ ), 54.6 (CH), 51.2 (CH, d,  $J = 10$  Hz), 47.2 ( $\text{CH}_2$ ), 36.2 (CH, d,  $J=18$  Hz), 31.5 ( $\text{CH}_2$ , d,  $J = 26$  Hz), 28.5 ( $\text{CH}_2$ , d,  $J = 8$  Hz), 21.5 ( $\text{CH}_3$ ), 20.9 ( $\text{CH}_3$ ), 15.4 ( $\text{CH}_3$ , d,  $J= 9$  Hz);  $^{19}\text{F}$  NMR (376MHz,  $\text{CDCl}_3$ )  $\delta$  -146.74; HRMS (ESI)  $m/z$ : 686.24593  $[\text{M} + \text{Na}]^+$ , calcd. for  $\text{C}_{39}\text{H}_{38}\text{O}_4\text{N}_3\text{FNaS}$ ; Found 686.24556.

**(3a'R,4S,4'S,6'R,7'R,7a'R)-3a'-fluoro-6'-(3-methoxyphenyl)-3-methyl-1,7'-diphenyl-1'-tosyl-2',3',3a',4',6',7'-hexahydro-1'H-spiro[pyrazole-4,5'-[7a,4](epoxyethano)indol]-5(1H)-one (6k):**

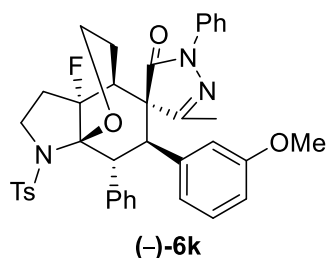

Prepared by following general procedure **C** purified by column chromatography using EtOAc/hexane and isolated product **6k** in 68% yield as a white solid with **M. P.** 100 - 102 °C. The enantiomeric excess (*ee*) was determined by chiral stationary phase HPLC using a Daicel Chiralpak IC column (hexane/EtOAc = 65:35, flow rate 0.5 mL/min,  $\lambda = 254$  nm),  $t_R = 14.714$  min (major),  $t_R = 19.747$  min (minor),  $[\alpha]_D^{25} = -95.716$  ( $\text{CHCl}_3$ ,  $c =$

0.26 g/100ml for 93% ee); **IR (neat)**  $\nu_{\max}$  2916, 1705, 1597, 1597, 1458 and 1157  $\text{cm}^{-1}$ ;  **$^1\text{H NMR}$  (400 MHz,  $\text{CDCl}_3$ )**  $\delta$  7.32 (2H, d,  $J = 7.9$  Hz), 7.24 – 7.18 (4H, m), 7.08 - 7.07 (8H, m), 6.95 - 6.91 (1H, m), 6.69 – 6.50 (3H, m), 4.85 – 4.78 (1H, m), 4.56 (1H, d,  $J = 11.6$  Hz), 3.84 - 3.75 (3H, m), 3.64 (3H, s), 3.53 – 3.46 (1H, m), 2.82 - 2.79 (1H, m), 2.79 – 2.61 (1H, m), 2.34 (3H, s), 2.30 (3H, d,  $J = 4.8$  Hz), 2.26 - 2.22 (1H, m), 2.18 - 2.09 (1H, m), 2.00 - 1.95 (1H, m).  **$^{13}\text{C NMR}$  (100 MHz,  $\text{CDCl}_3$ , DEPT-135)**  $\delta$  171.9 (C, N-C=O), 162.1 (C, C=N), 158.8 (C), 143.0 (C), 142.1 (C), 137.3 (C), 137.1 (C), 136.6 (C), 131.0 (CH), 128.9 (3CH), 128.5 (CH), 128.4 (3CH), 128.2 (2CH), 127.5 (2CH), 125.8 (CH), 125.3 (CH), 122.4 (CH), 119.9 (3CH), 103.5 (C, d,  $J=187$  Hz), 97.1 (C, d,  $J = 20$  Hz), 62.3 (C), 59.6 ( $\text{CH}_2$ ), 55.2 ( $\text{CH}_3$ ), 54.8 (CH), 51.5 (CH, d,  $J = 10$  Hz), 47.2 ( $\text{CH}_2$ ), 36.3 (CH, d,  $J=17$  Hz), 31.5 ( $\text{CH}_2$ , d,  $J = 26$  Hz), 28.5 ( $\text{CH}_2$ , d,  $J = 8$  Hz), 21.5 ( $\text{CH}_3$ ), 15.3 ( $\text{CH}_3$ , d,  $J = 8$  Hz);  **$^{19}\text{F NMR}$  (376MHz,  $\text{CDCl}_3$ )**  $\delta$  -146.15; **HRMS (ESI)**  $m/z$ : 702.24084 [ $\text{M} + \text{Na}$ ] $^+$ , calcd. for  $\text{C}_{39}\text{H}_{38}\text{O}_5\text{N}_3\text{FNaS}$ ; Found 702.24185.

**(3a'R,4S,4'S,6'R,7'R,7a'R)-3a'-fluoro-6'-(4-methoxyphenyl)-3-methyl-1,7'-diphenyl-1'-tosyl-2',3',3a',4',6',7'-hexahydro-1'H-spiro[pyrazole-4,5'-[7a,4](epoxyethano)indol]-5(1H)-one (6I):**

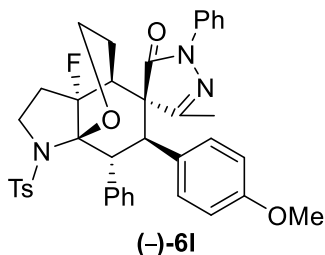

Prepared by following general procedure **C** purified by column chromatography using EtOAc/hexane and isolated product **6I** in 63% yield as a white solid with **M. P.** 173 - 175 °C. The enantiomeric excess (ee) was determined by chiral stationary phase **HPLC** using a Daicel Chiralpak IC column (hexane/EtOAc = 65:35, flow rate 0.5 mL/min,  $\lambda = 254$  nm),  $t_R = 16.279$  min (major),  $t_R = 21.988$  min (minor),  $[\alpha]_D^{25} = -119.672$  ( $\text{CHCl}_3$ ,  $c =$

1.4 g/100ml for 97% ee); **IR (neat)**  $\nu_{\max}$  2924, 1701, 1597, 1498, 1249 and 1159  $\text{cm}^{-1}$ ;  **$^1\text{H NMR}$  (400 MHz,  $\text{CDCl}_3$ )**  $\delta$  7.31 (2H, d,  $J=8.4$  Hz), 7.22 (2H, d,  $J=8.4$  Hz), 7.19-7.16 (2H, m), 7.12-6.90 (10H, m), 6.57 (2H, br s), 4.81 (1H, sept,  $J = 3.2$  Hz), 4.52 (1H, d,  $J=11.6$ Hz), 3.83-3.72 (3H, m), 3.59 (1H, s), 3.50 (1H, sext,  $J = 6.8$  Hz), 2.83-2.79 (1H, m), 2.69 (1H, dq,  $J=13.2, 13.2$  Hz), 2.34 (3H, s), 2.30 (3H, d,  $J=4.96$  Hz), 2.24-2.21 (1H, m), 2.11-2.08 (1H, m), 2.03-1.92 (1H, m).  **$^{13}\text{C NMR}$  (100 MHz,  $\text{CDCl}_3$ , DEPT-135)**  $\delta$  172.2 (C, N-C=O), 162.2 (C, C=N), 158.7 (C), 143.0 (C), 142.4 (C), 137.1 (C), 136.7 (C), 131.1 (CH), 130.9 (C), 128.9 (2CH), 128.5 (3CH), 128.2 (2CH), 127.9(CH), 127.5 (3CH), 125.8 (CH), 125.3 (CH), 120.0 (3CH), 113.1 (CH), 103.5 (C, d,  $J=186.6$  Hz), 97.1 (C, d,  $J=19.7$ Hz), 62.6 (C), 59.6 ( $\text{CH}_2$ ), 55.1 ( $\text{CH}_3$ ), 55.0 (CH), 50.8 (CH, d,  $J=9.7$  Hz), 47.2 ( $\text{CH}_2$ ), 36.2 (CH, d,  $J=19.7$  Hz), 31.5 ( $\text{CH}_2$ , d,  $J=26.4$  Hz), 28.5 ( $\text{CH}_2$ , d,  $J=7.8$  Hz), 21.5 ( $\text{CH}_3$ ), 15.4 ( $\text{CH}_3$ , d,  $J = 9$  Hz);  **$^{19}\text{F NMR}$  (376MHz,  $\text{CDCl}_3$ )**  $\delta$  -146.58; **HRMS (ESI)**  $m/z$ : 702.2408 [ $\text{M} + \text{Na}$ ] $^+$ , calcd. for  $\text{C}_{39}\text{H}_{38}\text{O}_5\text{N}_3\text{FNaS}$ ; Found 702.2410.

**(3a'R,4S,4'S,6'R,7'R,7a'R)-6'-(4-(benzyloxy)phenyl)-3a'-fluoro-3-methyl-1,7'-diphenyl-1'-tosyl-2',3',3a',4',6',7'-hexahydro-1'H-spiro[pyrazole-4,5'-[7a,4](epoxyethano)indol]-5(1H)-one (6m):**

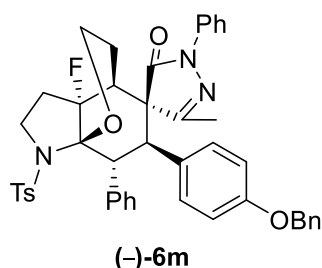

Prepared by following general procedure **C** purified by column chromatography using EtOAc/hexane and isolated product **6m** in 55% yield as a white solid with **M. P.** 108 - 111 °C. The enantiomeric excess (*ee*) was determined by chiral stationary phase **HPLC** using a Daicel Chiralpak IC column (hexane/EtOAc = 65:35, flow rate 0.5 mL/min,  $\lambda$  = 254 nm),  $t_R$  = 15.029 min (major),  $t_R$  = 20.162 min (minor),  $[\alpha]_D^{25}$  = -84.277 (CHCl<sub>3</sub>, *c* = 0.29 g/100ml for 92% *ee*); **IR (neat)**  $\nu_{\max}$  2924, 1705, 1597, 1458, 1157 and

756 cm<sup>-1</sup>; **<sup>1</sup>H NMR (400 MHz, CDCl<sub>3</sub>)**  $\delta$  7.32 – 7.28 (8H, m), 7.24 – 7.16 (2H, m), 7.10-7.08 (8H, m), 6.66-6.64 (2H, m), 4.86 – 4.79 (3H, m), 4.53 (1H, d, *J* = 11.5 Hz), 3.84 - 3.71 (3H, m), 3.53 – 3.47 (1H, m), 2.82-2.78 (1H, m), 2.78 – 2.61 (1H, m), 2.34 (3H, s), 2.30 (3H, d, *J* = 4.9 Hz), 2.25 - 2.22 (1H, m), 2.16 - 2.12 (1H, m), 1.99 - 1.94 (1H, m). **<sup>13</sup>C NMR (100 MHz, CDCl<sub>3</sub>, DEPT-135)**  $\delta$  172.1 (C, N-C=O), 162.2 (C, C=N), 157.9 (C), 142.9 (C), 142.4 (C), 137.1 (C), 136.9 (C), 136.7 (C), 131.1 (CH), 128.9 (2CH), 128.5 (CH), 128.2 (2CH), 127.8 (6CH), 127.5 (2CH), 127.4 (3CH), 125.8 (CH), 125.3 (CH), 119.9 (3CH), 114.1 (CH), 103.4 (C-F, d, *J* = 187 Hz), 97.1 (C-O, d, *J* = 19 Hz), 69.8 (CH<sub>2</sub>), 62.6 (C), 59.6 (CH<sub>2</sub>), 54.9 (CH), 50.8 (CH, d, *J*=9 Hz), 47.1 (CH<sub>2</sub>), 36.2 (CH, d, *J*=18 Hz), 31.5 (CH<sub>2</sub>, d, *J*=26 Hz), 28.5 (CH<sub>2</sub>, d, *J*=8 Hz), 21.5 (CH<sub>3</sub>), 15.4 (CH<sub>3</sub>, d, *J*= 9 Hz); **<sup>19</sup>F NMR (376MHz, CDCl<sub>3</sub>)**  $\delta$  -146.62; **HRMS (ESI)** *m/z*: 778.27214 [M + Na]<sup>+</sup>, calcd. for C<sub>45</sub>H<sub>42</sub>O<sub>5</sub>N<sub>3</sub>FN<sub>3</sub>S; Found 778.27433.

**(3a'R,4S,4'S,6'R,7'R,7a'R)-3a'-fluoro-3-methyl-6'-(4-nitrophenyl)-1,7'-diphenyl-1'-tosyl-2',3',3a',4',6',7'-hexahydro-1'H-spiro[pyrazole-4,5'-[7a,4](epoxyethano)indol]-5(1H)-one (6n):**

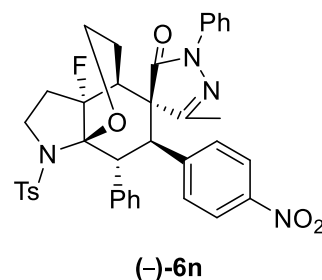

Prepared by following general procedure **C** purified by column chromatography using EtOAc/hexane and isolated product **6n** in 46% yield as a white solid with **M. P.** 131 - 134 °C. The enantiomeric excess (*ee*) was determined by chiral stationary phase **HPLC** using a Daicel Chiralpak IC column (hexane/EtOAc = 65:35, flow rate 0.5 mL/min,  $\lambda$  = 254 nm),  $t_R$  = 20.041 min (major),  $t_R$  = 25.652 min (minor),  $[\alpha]_D^{25}$  = -92.779 (CHCl<sub>3</sub>, *c* = 0.21 g/100ml for 95% *ee*); **IR (neat)**  $\nu_{\max}$  2924, 1705, 1597, 1342, 1157

and 748 cm<sup>-1</sup>; **<sup>1</sup>H NMR (400 MHz, CDCl<sub>3</sub>)**  $\delta$  7.91 (2H, d, *J* = 8.4 Hz), 7.42 – 7.30 (4H, m), 7.22 (2H, t, *J* = 7.7 Hz), 7.15 – 7.14 (3H, m), 7.09 – 7.07 (7H, m), 4.83 – 4.76 (1H, m), 4.57 (1H, d, *J* = 11.5 Hz), 3.93 (1H, dd, *J* = 4.6, 11.5 Hz), 3.85 - 3.78 (2H, m), 3.55 – 3.48 (1H, m), 2.87 - 2.86 (1H, m), 2.82 – 2.62 (1H, m), 2.35 (3H, s), 2.33 (3H, d, *J* = 4.8 Hz), 2.22 – 2.20 (1H, m), 2.17 – 2.12 (1H, m), 2.05 – 1.99 (1H, m); **<sup>13</sup>C NMR (100 MHz, CDCl<sub>3</sub>, DEPT-135)**  $\delta$  171.5 (C, N-C=O), 161.6 (C, C=N), 147.0 (C), 143.9 (C), 143.2 (C), 141.4 (C), 136.7 (C), 136.5 (C), 130.9 (2CH), 128.9 (2CH), 128.7 (3CH), 128.2 (2CH), 127.9 (2CH), 126.3 (CH), 125.7 (CH), 122.9 (2CH), 119.3 (3CH), 103.6 (C-F, d, *J* = 187 Hz), 96.7 (C-O, d, *J* = 20 Hz),

62.4 (C), 59.5 (CH<sub>2</sub>), 54.8 (CH), 51.3 (CH, d, *J* = 10 Hz), 47.2 (CH<sub>2</sub>), 36.4 (CH, d, *J* = 19 Hz), 31.5 (CH<sub>2</sub>, d, *J* = 26 Hz), 28.6 (CH<sub>2</sub>, d, *J* = 8 Hz), 21.5 (CH<sub>3</sub>), 15.3 (CH<sub>3</sub>, d, *J* = 9 Hz); <sup>19</sup>F NMR (376MHz, CDCl<sub>3</sub>) δ -147.49; HRMS (ESI) *m/z*: 717.21535 [M + Na]<sup>+</sup>, calcd. for C<sub>38</sub>H<sub>35</sub>N<sub>4</sub>O<sub>6</sub>SFNa; Found 717.41696.

**3-((3a'R,4S,4'S,6'R,7'R,7a'R)-3a'-fluoro-3-methyl-5-oxo-1,7'-diphenyl-1'-tosyl-1,2',3',3a',4',5,6',7'-octahydro-1'H-spiro[pyrazole-4,5'-[7a,4](epoxyethano)indol]-6'-yl)benzonitrile (6o):**

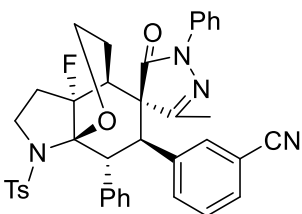

(-)-6o

Prepared by following general procedure **C** purified by column chromatography using EtOAc/hexane and isolated product **6o** in 53% yield as a yellow solid with **M. P.** 180 - 182 °C. The enantiomeric excess (*ee*) was determined by chiral stationary phase **HPLC** using a Daicel Chiralpak IC column (hexane/EtOAc = 65:35, flow rate 0.5 mL/min, λ = 254 nm), *t<sub>R</sub>* = 20.041 min (major), *t<sub>R</sub>* = 25.652 min (minor), [α]<sub>D</sub><sup>25</sup> = -73.684 (CHCl<sub>3</sub>, *c* = 0.4 g/100ml for 64% *ee*); IR (neat) *v*<sub>max</sub> 2924, 1697, 1496, 1327, 1157 and

756 cm<sup>-1</sup>; <sup>1</sup>H NMR (400 MHz, CDCl<sub>3</sub>) δ 7.36 (2H, d, *J* = 8 Hz), 7.29 – 7.26 (3H, m), 7.25 – 7.18 (3H, m), 7.14 – 7.08 (10H, m), 4.81 – 4.75 (1H, m), 4.53 (1H, d, *J* = 11.6 Hz), 3.85 - 3.76 (3H, m), 3.51 (1H, sext, *J* = 6.8 Hz), 2.86 - 2.61 (2H, m), 2.35 (3H, s), 2.32 (3H, d, *J* = 4.4 Hz), 2.29 – 2.12 (2H, m), 2.04 – 1.97 (1H, m); <sup>13</sup>C NMR (100 MHz, CDCl<sub>3</sub>, DEPT-135) δ 171.6 (C, N-C=O), 161.6 (C, C=N), 143.2 (C), 141.4 (C), 136.8 (C), 136.5 (C), 134.5 (C), 133.5 (C), 131.4 (CH), 130.9 (CH), 129.0 (3CH), 128.6 (4CH), 128.2 (2CH), 127.8 (2CH), 126.3 (CH), 125.5 (CH), 119.3 (3CH), 103.6 (C-F, d, *J* = 186 Hz), 96.8 (C-O, d, *J* = 20 Hz), 62.4 (C), 59.5 (CH<sub>2</sub>), 54.9 (CH), 51.2 (CH, d, *J* = 11 Hz), 47.2 (CH<sub>2</sub>), 36.3 (CH, d, *J* = 18 Hz), 31.5 (CH<sub>2</sub>, d, *J* = 27 Hz), 28.5 (CH<sub>2</sub>, d, *J* = 8 Hz), 21.5 (CH<sub>3</sub>), 15.3 (CH<sub>3</sub>, d, *J* = 9 Hz); <sup>19</sup>F NMR (376MHz, CDCl<sub>3</sub>) δ -146.36; HRMS (ESI) *m/z*: 697.22553 [M + Na]<sup>+</sup>, calcd. for C<sub>39</sub>H<sub>35</sub>N<sub>4</sub>O<sub>4</sub>SFNa; Found 697.22481.

**(3a'R,4S,4'S,6'R,7'R,7a'R)-3a'-fluoro-3-methyl-6'-(naphthalen-1-yl)-1,7'-diphenyl-1'-tosyl-2',3',3a',4',6',7'-hexahydro-1'H-spiro[pyrazole-4,5'-[7a,4](epoxyethano)indol]-5(1H)-one (6p):**

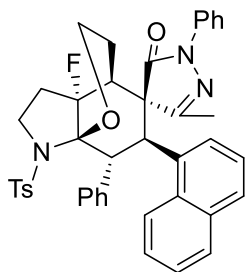

(-)-6p

Prepared by following general procedure **C** purified by column chromatography using EtOAc/hexane and isolated product **6p** in 41% yield as a white solid with **M. P.** 109 °C. The enantiomeric excess (*ee*) was determined by chiral stationary phase **HPLC** using a Daicel Chiralpak IC column (hexane/EtOAc = 65:35, flow rate 0.5 mL/min, λ = 254 nm), *t<sub>R</sub>* = 14.945 min (major), *t<sub>R</sub>* = 21.654 min (minor), [α]<sub>D</sub><sup>25</sup> = -84.000 (CHCl<sub>3</sub>, *c* = 0.10 g/100ml for 92% *ee*); IR (neat) *v*<sub>max</sub> 2854, 1705, 1597, 1458, 1157 and 756 cm<sup>-1</sup>; <sup>1</sup>H NMR (400 MHz, CDCl<sub>3</sub>) δ 8.17 (1H, d, *J* = 7.4 Hz), 7.56 – 7.38 (6H, m), 7.16 - 7.12 (5H, m), 7.09 – 7.07 (6H, m), 6.93 – 6.86

(3H, m), 4.91 – 4.84 (2H, m), 4.67 (1H, d, *J* = 11.2 Hz), 4.00 - 3.83 (3H, m), 3.60 – 3.53 (1H, m), 2.88 - 2.85 (1H, m), 2.76 – 2.68 (1H, m), 2.34 – 2.33 (6H, m), 2.26 – 2.17 (1H, m), 2.04 – 1.96 (1H, m). <sup>13</sup>C NMR (100 MHz, CDCl<sub>3</sub>, DEPT-135) δ 172.2 (C, N-C=O), 162.0 (C, C=N), 143.0 (C), 141.7 (C), 136.8 (C), 136.6 (C), 133.1 (C), 133.0 (C), 132.5 (C), 130.9 (CH), 128.9 (2CH), 128.8 (CH), 128.6 (CH), 128.3 (3CH), 128.2

(2CH), 128.1 (CH), 127.3 (2CH), 125.8 (CH), 125.2 (CH), 125.2 (CH), 124.8 (CH), 124.6 (CH), 121.7 (CH), 119.8 (2CH), 103.7 (C-F,  $d, J = 187$  Hz), 97.0 (C-O,  $d, J = 20$  Hz), 62.1 (C), 59.8 (CH<sub>2</sub>), 57.8 (CH), 47.2 (CH<sub>2</sub>), 43.8 (CH,  $d, J = 10$  Hz), 36.5 (CH,  $d, J = 18$  Hz), 31.6 (CH<sub>2</sub>,  $d, J = 26$  Hz), 28.4 (CH<sub>2</sub>,  $d, J = 8$  Hz), 21.5 (CH<sub>3</sub>), 16.2 (CH<sub>3</sub>,  $d, J = 10$  Hz); **<sup>19</sup>F NMR (376MHz, CDCl<sub>3</sub>)**  $\delta$  -146.17; **HRMS (ESI)**  $m/z$ : 772.24593 [M + Na]<sup>+</sup>, calcd. for C<sub>42</sub>H<sub>38</sub>O<sub>4</sub>N<sub>3</sub>FNaS; Found 722.24455.

**(3a'R,4S,4'S,6'S,7'R,7a'R)-3a'-fluoro-3-methyl-1,7'-diphenyl-6'-((E)-styryl)-1'-tosyl-2',3',3a',4',6',7'-hexahydro-1'H-spiro[pyrazole-4,5'-[7a,4](epoxyethano)indol]-5(1H)-one (6q):**

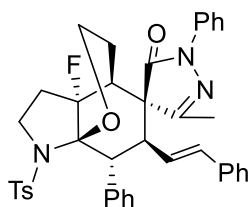

**(-)-6q**

Prepared by following general procedure **C** purified by column chromatography using EtOAc/hexane and isolated product **6q** in 53% yield as a white solid with **M.P.** 171 °C. The enantiomeric excess (*ee*) was determined by chiral stationary phase **HPLC** using a Daicel Chiralpak IC column (hexane/EtOAc = 65:35, flow rate 0.5 mL/min,  $\lambda = 254$  nm),  $t_R = 15.088$  min (major),  $t_R = 17.582$  min (minor),  **$[\alpha]_D^{25} = -57.304$**  (CHCl<sub>3</sub>,  $c = 0.19$  g/100ml for 95% *ee*); **IR (neat)**  $\nu_{max}$  2924, 1705, 1597, 1496, 1157 and 663 cm<sup>-1</sup>; **<sup>1</sup>H NMR (400 MHz, CDCl<sub>3</sub>)**  $\delta$  7.64 (2H,  $d, J = 7.9$

Hz), 7.30 – 7.20 (4H, m), 7.20 - 7.19 (3H, m), 7.14 – 7.07 (8H, m), 6.95 – 6.93 (2H, m), 5.98 – 5.91 (1H, m), 5.63 (1H,  $d, J = 15.6$  Hz), 4.90 – 4.83 (1H, m), 4.04 (1H,  $d, J = 10.7$  Hz), 3.85 - 3.80 (2H, m), 3.53 – 3.46 (1H, m), 3.21 – 3.14 (1H, m), 2.80 – 2.63 (2H, m), 2.35 (3H, s), 2.21 (3H,  $d, J = 5.2$  Hz), 2.13 – 2.00 (3H, m). **<sup>13</sup>C NMR (100 MHz, CDCl<sub>3</sub>, DEPT-135)**  $\delta$  172.5 (C, N-C=O), 162.8 (C, C=N), 142.9 (C), 142.6 (C), 137.4 (C), 136.7 (C), 136.5 (C), 134.2 (CH), 131.1 (CH), 128.9 (2CH), 128.7 (3CH), 128.3 (2CH), 128.2 (2CH), 127.8 (2CH), 127.4 (CH), 127.2 (CH), 126.4 (2CH), 126.0 (CH), 125.5 (CH), 119.9 (2CH), 102.9 (C-F,  $d, J = 186$  Hz), 96.5 (C-O,  $d, J = 20$  Hz), 61.5 (C), 59.7 (CH<sub>2</sub>), 54.0 (CH), 49.0 (CH,  $d, J = 10$  Hz), 47.2 (CH<sub>2</sub>), 36.6 (CH,  $d, J = 18$  Hz), 31.3 (CH<sub>2</sub>,  $d, J = 25$  Hz), 28.7 (CH<sub>2</sub>,  $d, J = 8$  Hz), 21.5 (CH<sub>3</sub>), 15.3 (CH<sub>3</sub>,  $d, J = 10$  Hz); **<sup>19</sup>F NMR (376MHz, CDCl<sub>3</sub>)**  $\delta$  -147.88; **HRMS (ESI)**  $m/z$ : 698.24593 [M + Na]<sup>+</sup>, calcd. for C<sub>40</sub>H<sub>38</sub>O<sub>4</sub>N<sub>3</sub>FNaS; Found 698.24741.

**(3a'R,4S,4'S,6'S,7'R,7a'R)-3a'-fluoro-6'-(furan-2-yl)-3-methyl-1,7'-diphenyl-1'-tosyl-2',3',3a',4',6',7'-hexahydro-1'H-spiro[pyrazole-4,5'-[7a,4](epoxyethano)indol]-5(1H)-one (6r):**

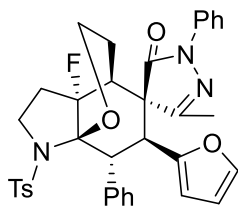

**(-)-6r**

Prepared by following general procedure **C** purified by column chromatography using EtOAc/hexane and isolated product **6r** in 61% yield as a white solid with **M.P.** 118 °C. The enantiomeric excess (*ee*) was determined by chiral stationary phase **HPLC** using a Daicel Chiralpak IC column (hexane/EtOAc = 65:35, flow rate 0.5 mL/min,  $\lambda = 254$  nm),  $t_R = 15.638$  min (major),  $t_R = 27.233$  min (minor),  **$[\alpha]_D^{25} = -53.830$**  (CHCl<sub>3</sub>,  $c = 0.14$  g/100ml for 95% *ee*); **IR (neat)**  $\nu_{max}$  2924, 1712,

1597, 1357, 1157 and 756 cm<sup>-1</sup>; **<sup>1</sup>H NMR (400 MHz, CDCl<sub>3</sub>)**  $\delta$  7.47 (2H,  $d, J = 7.6$  Hz), 7.28-7.26 (2H, m), 7.24 - 7.23 (2H, m), 7.13 - 7.07 (8H, m), 6.89 (2H,  $d, J = 4.4$  Hz), 6.70 (1H, t,  $J = 4.3$  Hz), 4.80 – 4.73 (1H, m), 4.47 (1H,  $d, J = 11.5$  Hz), 4.09 (1H, dd,  $J = 4.5, 11.4$  Hz), 3.81 - 3.67 (2H, m), 3.51 – 3.44 (1H, m),

2.84 - 2.80 (1H, m), 2.77 - 2.57 (1H, m), 2.34 (3H, s), 2.28 (3H, d,  $J = 4.6$  Hz), 2.25 - 2.08 (2H, m), 2.01 - 1.93 (1H, m);  $^{13}\text{C NMR}$  (100 MHz,  $\text{CDCl}_3$ , DEPT-135)  $\delta$  171.7 (C, N-C=O), 162.6 (C, C=N), 150.6 (C), 143.0 (C), 142.0 (C), 141.7 (CH), 137.4 (C), 136.6 (C), 130.9 (CH), 128.9 (2CH), 128.6 (3CH), 128.3 (2CH), 127.6 (2CH), 126.2 (CH), 125.2 (CH), 119.7 (2CH), 110.2 (CH), 109.0 (CH), 103.4 (C-F, d,  $J = 187$  Hz), 96.5 (C-O, d,  $J = 19$  Hz), 61.2 (C), 59.3 ( $\text{CH}_2$ ), 53.3 (CH), 47.1 ( $\text{CH}_2$ ), 45.2 (CH, d,  $J = 10$  Hz), 36.3 (CH, d,  $J = 18$  Hz), 31.3 ( $\text{CH}_2$ , d,  $J = 27$  Hz), 28.5 ( $\text{CH}_2$ , d,  $J = 7$  Hz), 21.5 ( $\text{CH}_3$ ), 14.9 ( $\text{CH}_3$ , d,  $J = 8$  Hz),  $^{19}\text{F NMR}$  (376MHz,  $\text{CDCl}_3$ )  $\delta$  -146.29; **HRMS (ESI)**  $m/z$ : 662.20954 [ $\text{M} + \text{Na}$ ] $^+$ , calcd. for  $\text{C}_{36}\text{H}_{34}\text{O}_5\text{N}_3\text{FNaS}$ ; Found 662.211049.

**(3a'R,4R,4'S,6'S,7'R,7a'R)-3a'-fluoro-3-methyl-1,7'-diphenyl-6'-(thiophen-2-yl)-1'-tosyl-2',3',3a',4',6',7'-hexahydro-1'H-spiro[pyrazole-4,5'-[7a,4](epoxyethano)indol]-5(1H)-one (6s):**

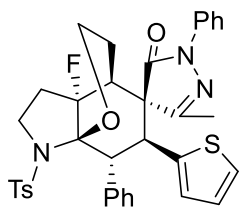

**(-)-6s**

Prepared by following general procedure **C** purified by column chromatography using EtOAc/hexane and isolated product **6s** in 52% yield as a white solid with **M. P.** 192 - 200 °C. The enantiomeric excess (*ee*) was determined by chiral stationary phase **HPLC** using a Daicel Chiralpak IC column (hexane/EtOAc = 65:35, flow rate 0.5 mL/min,  $\lambda = 254$  nm),  $t_R = 15.609$  min (major),  $t_R = 29.384$  min (minor),  $[\alpha]_D^{25} = -122.286$  ( $\text{CHCl}_3$ ,  $c = 1.1$  g/100ml for 97% *ee*); **IR (neat)**  $\nu_{\text{max}}$  2924, 1705,

1597, 1498, 1278 and 1159  $\text{cm}^{-1}$ ;  $^1\text{H NMR}$  (400 MHz,  $\text{CDCl}_3$ )  $\delta$  7.47 (2H, d,  $J = 7.64$  Hz), 7.29-7.27 (2H, m), 7.25-7.24 (2H, m), 7.13-7.07 (8H, m), 6.90 (2H, d,  $J = 4.44$  Hz), 6.71 (1H, t,  $J = 4.4$  Hz), 4.77 (1H, sept,  $J = 3.2$  Hz), 4.48 (1H, d,  $J = 11.5$  Hz), 4.10 (1H, dd,  $J = 13.2, 13.2$  Hz), 3.82-3.67 (2H, m), 3.48 (sext, 1H,  $J = 6.5$  Hz), 2.84-2.81 (1H, m), 2.67 (1H, dq,  $J = 13.2, 13.2$  Hz), 2.34 (3H, s), 2.28 (3H, d,  $J = 4.6$  Hz), 2.25-2.08 (2H, m), 2.02-1.93 (1H, s).  $^{13}\text{C NMR}$  (100 MHz,  $\text{CDCl}_3$ , DEPT-135)  $\delta$  171.9 (C, N-C=O), 162.4 (C, C=N), 143.1 (C), 141.9 (C), 138.9 (C), 137.3 (C), 136.6 (C), 131.2 (CH), 128.9 (2CH), 128.6 (3CH), 128.2 (2CH), 127.5 (2CH), 127.2 (CH), 126.5 (CH), 126.0 (CH), 125.4 (CH), 124.3 (CH), 119.9 (3CH), 103.5 (C, d,  $J = 186.4$  Hz), 96.9 (C, d,  $J = 19.7$  Hz), 62.5 (C), 59.5 ( $\text{CH}_2$ ), 56.9 (CH), 47.2 ( $\text{CH}_2$ ), 46.3 (CH, d,  $J = 10.9$  Hz), 36.4 (CH, d,  $J = 18$  Hz), 31.5 ( $\text{CH}_2$ , d,  $J = 26.4$  Hz), 28.7 ( $\text{CH}_2$ , d,  $J = 7.8$  Hz), 21.5 ( $\text{CH}_3$ ), 15.0 ( $\text{CH}_3$ , d,  $J = 26.4$  Hz),  $^{19}\text{F NMR}$  (376MHz,  $\text{CDCl}_3$ )  $\delta$  -146.3; **HRMS (ESI)**  $m/z$ : 678.1867 [ $\text{M} + \text{Na}$ ] $^+$ , calcd. for  $\text{C}_{36}\text{H}_{34}\text{O}_4\text{N}_3\text{FNaS}_2$ ; Found 678.1866.

**(3a'R,4S,4'S,6'R,7'R,7a'R)-3a'-fluoro-3-methyl-6'-(4-nitrophenyl)-1,7'-diphenyl-1'-tosyl-2',3',3a',4',6',7'-hexahydro-1'H-spiro[pyrazole-4,5'-[7a,4](epoxyethano)indol]-5(1H)-one (6t):**

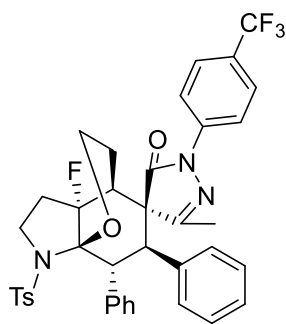

**(-)-6t**

Prepared by following general procedure **C** purified by column chromatography using EtOAc/hexane and isolated product **6t** in 57% yield as a white solid with **M. P.** 120 - 124 °C. The enantiomeric excess (*ee*) was determined by chiral stationary phase **HPLC** using a Daicel Chiralpak IC column (hexane/EtOAc = 65:35, flow rate 0.5 mL/min,  $\lambda = 254$  nm),  $t_R = 11.375$  min (major),  $t_R = 13.771$  min (minor),  $[\alpha]_D^{25} = -110.024$  ( $\text{CHCl}_3$ ,  $c =$

0.16 g/100ml for 93% ee); **IR (neat)**  $\nu_{\max}$  2924, 1712, 1612, 1458, 1319 and 1118  $\text{cm}^{-1}$ ;  **$^1\text{H NMR}$  (400 MHz,  $\text{CDCl}_3$ )**  $\delta$  7.54 (2H, d,  $J = 8.5$  Hz), 7.45 (2H, d,  $J = 8.7$  Hz), 7.35 – 7.30 (1H, m), 7.18 – 7.16 (3H, m), 7.08 – 7.02 (10H, m), 4.78 – 4.72 (1H, m), 4.60 (1H, d,  $J = 11.5$  Hz), 3.85 – 3.72 (3H, m), 3.54 - 3.47 (1H, m), 2.85 - 2.82 (1H, m), 2.80 – 2.35 (3H, s), 2.33 (3H, d,  $J = 4.7$  Hz), 2.20 – 2.19 (1H, m), 2.17 – 2.11 (1H, m), 2.01 – 1.96 (1H, m);  **$^{13}\text{C NMR}$  (100 MHz,  $\text{CDCl}_3$ , DEPT-135)**  $\delta$  172.3 (C, N-C=O), 162.7 (C, C=N), 143.1 (C), 142.0 (C), 139.8 (C), 136.6 (C), 135.5 (C), 131.1 (CH), 129.7 (CH), 128.9 (3CH), 128.2 (2CH), 127.7 (2CH), 127.6 (CH), 127.5 (2CH), 126.5 (C, q,  $J = 33$  Hz), 125.9 (CH), 125.6 (2CH, q,  $J = 33$  Hz), 124.0 (C-F<sub>3</sub>, q,  $J = 270$  Hz), 118.7 (3CH), 103.5 (C-F, d,  $J = 187$  Hz), 97.0 (C-O, d,  $J = 19$  Hz), 62.8 (C), 59.4 (CH<sub>2</sub>), 54.9 (CH), 51.7 (CH, d,  $J = 10$  Hz), 47.1 (CH<sub>2</sub>), 36.2 (CH, d,  $J = 18$  Hz), 31.5 (CH<sub>2</sub>, d,  $J = 26$  Hz), 28.5 (CH<sub>2</sub>, d,  $J = 8$  Hz), 21.5 (CH<sub>3</sub>), 15.4 (CH<sub>3</sub>, d,  $J = 9$  Hz);  **$^{19}\text{F NMR}$  (376MHz,  $\text{CDCl}_3$ )**  $\delta$  -62.21, -146.19; **HRMS (ESI)**  $m/z$ : 740.21766 [ $\text{M} + \text{Na}$ ]<sup>+</sup>, calcd. for  $\text{C}_{39}\text{H}_{35}\text{N}_3\text{O}_4\text{SF}_4\text{Na}$ ; Found 740.21847.

**(3a'R,4S,4'S,6'R,7'R,7a'R)-3a'-fluoro-3-methyl-1-(3-nitrophenyl)-6',7'-diphenyl-1'-tosyl-2',3',3a',4',6',7'-hexahydro-1'H-spiro[pyrazole-4,5'-[7a,4](epoxyethano)indol]-5(1H)-one (6u):**

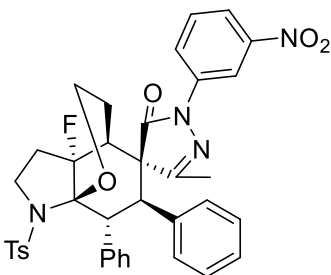

**(-)-6u**

Prepared by following general procedure **C** purified by column chromatography using EtOAc/hexane and isolated product **6u** in 44% yield as a white solid with **M. P.** 213 - 215 °C. The enantiomeric excess (ee) was determined by chiral stationary phase **HPLC** using a Daicel Chiralpak IC column (hexane/EtOAc = 65:35, flow rate 0.5 mL/min,  $\lambda = 254$  nm),  $t_R = 17.935$  min (major),  $t_R = 26.464$  min (minor),  $[\alpha]_D^{25} = -82.945$  ( $\text{CHCl}_3$ ,  $c = 0.24$  g/100ml for 85% ee); **IR (neat)**  $\nu_{\max}$  2916, 1705, 1527, 1342, 1157 and 663  $\text{cm}^{-1}$ ;  **$^1\text{H NMR}$  (400 MHz,  $\text{CDCl}_3$ )**  $\delta$  8.25 (1H, s), 7.89 (1H, d,  $J = 8.2$  Hz), 7.80 (1H, d,  $J = 8.3$  Hz), 7.36 (1H, t,  $J = 8.2$  Hz), 7.31 – 7.29 (1H, m), 7.18 - 7.03 (12H, m), 6.94 – 6.90 (1H, m), 4.76 – 4.69 (1H, m), 4.60 (1H, d,  $J = 11.4$  Hz), 3.85 – 3.73 (3H, m), 3.54 - 3.48 (1H, m), 2.86 - 2.84 (1H, m), 2.80 – 2.60 (1H, m), 2.35 (6H, s), 2.26 – 2.12 (2H, m), 2.04 – 1.97 (1H, m);  **$^{13}\text{C NMR}$  (100 MHz,  $\text{CDCl}_3$ , DEPT-135)**  $\delta$  172.3 (C, N-C=O), 162.9 (C, C=N), 148.2 (C), 143.1 (C), 141.8 (C), 138.0 (C), 136.6 (C), 135.4 (C), 131.1 (CH), 129.8 (CH), 129.3 (3CH), 128.9 (3CH), 128.2 (2CH), 127.7 (2CH), 127.7 (CH), 127.6 (2CH), 125.9 (CH), 124.4 (CH), 119.4 (CH), 113.9 (2CH), 103.5 (C-F, d,  $J = 187$  Hz), 97.1 (C-O, d,  $J = 20$  Hz), 62.9 (C), 59.3 (C), 55.0 (CH), 51.8 (CH, d,  $J = 9$  Hz), 47.1 (CH<sub>2</sub>), 36.1 (CH, d,  $J = 18$  Hz), 31.5 (CH<sub>2</sub>, d,  $J = 26$  Hz), 28.5 (CH<sub>2</sub>, d,  $J = 8$  Hz), 21.5 (CH<sub>3</sub>), 15.3 (CH<sub>3</sub>, d,  $J = 9$  Hz);  **$^{19}\text{F NMR}$  (376MHz,  $\text{CDCl}_3$ )**  $\delta$  -146.07; **HRMS (ESI)**  $m/z$ : 717.21535 [ $\text{M} + \text{Na}$ ]<sup>+</sup>, calcd. for  $\text{C}_{38}\text{H}_{35}\text{N}_4\text{O}_6\text{SFNa}$ ; Found 717.21638.



**(3a'R,4S,4'S,6'S,7'R,7a'R)-1-(3-chlorophenyl)-3a'-fluoro-3,6'-dimethyl-7'-phenyl-1'-tosyl-2',3',3a',4',6',7'-hexahydro-1'H-spiro[pyrazole-4,5'-[7a,4](epoxyethano)indol]-5(1H)-one (6v):**

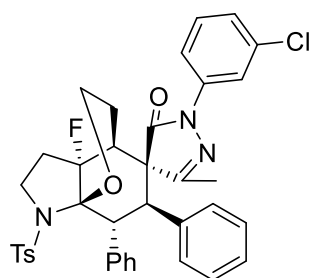

**(-)-6v**

Prepared by following general procedure **C** purified by column chromatography using EtOAc/hexane and isolated product **6v** in 62% yield as a white solid with **M. P.** 209 - 213 °C. The enantiomeric excess (*ee*) was determined by chiral stationary phase **HPLC** using a Daicel Chiralpak IC column (hexane/EtOAc = 65:35, flow rate 0.5 mL/min,  $\lambda$  = 254 nm),  $t_R$  = 13.189 min (major),  $t_R$  = 17.593 min (minor),  $[\alpha]_D^{25}$  = -107.622 (CHCl<sub>3</sub>, *c* = 0.17 g/100ml for 93% *ee*); **IR (neat)**  $\nu_{\max}$  2924, 1705, 1597, 1473, 1157 and 671 cm<sup>-1</sup>; **<sup>1</sup>H NMR (400 MHz, CDCl<sub>3</sub>)**  $\delta$  7.37 (1H, br s), 7.32 – 7.28 (1H, m), 7.18 – 7.14 (3H, m), 7.12 – 6.98 (13H, m), 4.80 - 4.73 (1H, m), 4.59 (1H, d, *J* = 11.5 Hz), 3.84 – 3.69 (3H, m), 3.54 - 3.47 (1H, m), 2.83 - 2.81 (1H, m), 2.77 - 2.60 (1H, m), 2.35 (3H, s), 2.32 (3H, d, *J* = 4.8 Hz), 2.19 - 2.18 (1H, m), 2.16 - 2.10 (1H, m), 2.02 – 1.95 (1H, m). **<sup>13</sup>C NMR (100 MHz, CDCl<sub>3</sub>, DEPT-135)**  $\delta$  172.1 (C, N-C=O), 162.4 (C, C=N), 143.1 (C), 142.1 (C), 138.1 (C), 136.6 (C), 135.6 (C), 134.1 (C), 131.0 (CH), 129.8 (CH), 129.5 (CH), 128.9 (2CH), 128.2 (2CH), 127.7 (2CH), 127.6 (CH), 127.5 (2CH), 125.9 (CH), 125.1 (CH), 119.6 (2CH), 117.4 (2CH), 103.5 (C-F, *d*, *J* = 186 Hz), 97.0 (C-O, *d*, *J* = 20 Hz), 62.7 (C), 59.5 (CH<sub>2</sub>), 54.8 (CH), 51.6 (CH, *d*, *J* = 10 Hz), 47.2 (CH<sub>2</sub>), 36.2 (CH, *d*, *J* = 18 Hz), 31.1 (CH<sub>2</sub>, *d*, *J* = 26 Hz), 28.4 (CH<sub>2</sub>, *d*, *J* = 7 Hz), 21.5 (CH<sub>3</sub>), 15.4 (CH<sub>3</sub>, *d*, *J* = 9 Hz); **<sup>19</sup>F NMR (376 MHz, CDCl<sub>3</sub>)**  $\delta$  -146.35 ; **HRMS (ESI)** *m/z*: 706.19130 [M + Na]<sup>+</sup>, calcd. for C<sub>38</sub>H<sub>35</sub>O<sub>4</sub>N<sub>3</sub>ClFNaS; Found 706.19226.

**(3a'R,4S,4'S,6'R,7'R,7a'R)-7'-(4-chlorophenyl)-3a'-fluoro-3-methyl-1,6'-diphenyl-1'-tosyl-2',3',3a',4',6',7'-hexahydro-1'H-spiro[pyrazole-4,5'-[7a,4](epoxyethano)indol]-5(1H)-one (6w):**

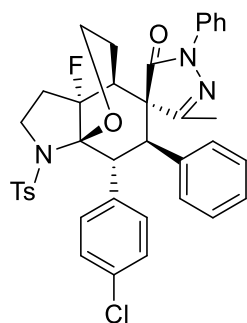

**(-)-6w**

Prepared by following general procedure **C** purified by column chromatography using EtOAc/hexane and isolated product **6w** in 51% yield as a yellow solid with **M. P.** 205 - 207 °C. The enantiomeric excess (*ee*) was determined by chiral stationary phase **HPLC** using a Daicel Chiralpak IC column (hexane/EtOAc = 65:35, flow rate 0.5 mL/min,  $\lambda$  = 254 nm),  $t_R$  = 11.065 min (major),  $t_R$  = 16.470 min (minor),  $[\alpha]_D^{25}$  = -123.754 (CHCl<sub>3</sub>, *c* = 0.29 g/100ml for 90% *ee*); **IR (neat)**  $\nu_{\max}$  2924, 1697, 1496, 1342, 1157 and 1087 cm<sup>-1</sup>; **<sup>1</sup>H NMR (400 MHz, CDCl<sub>3</sub>)**  $\delta$  7.24 – 7.19 (4H, m), 7.13 – 6.99 (14H, m), 4.84 – 4.78 (1H, m), 4.57 (1H, d, *J* = 11.6 Hz), 3.90 – 3.84 (1H, m), 3.74 – 3.67 (2H, m), 3.57 – 3.51 (1H, m), 2.83 – 2.62 (2H, m), 2.37 (3H, s), 2.30 (3H, d, *J* = 5 Hz), 2.20 – 2.07 (2H, m), 2.03 – 1.95 (1H, m). **<sup>13</sup>C NMR (100 MHz, CDCl<sub>3</sub>, DEPT-135)**  $\delta$  171.9 (C, N-C=O), 161.9 (C, C=N), 143.2 (C), 140.8 (C), 136.9 (C), 136.6 (C), 135.4 (C), 132.4 (CH), 131.8 (C), 129.8 (CH), 128.9 (2CH), 128.5 (3CH), 127.9 (2CH), 127.9 (2CH), 127.7 (CH), 127.6 (2CH), 125.5 (CH), 119.9 (3CH), 103.6 (C-F, *d*, *J* = 187 Hz), 96.8 (C-O, *d*, *J* = 19 Hz), 62.3 (C), 59.8 (CH<sub>2</sub>), 54.0 (CH), 51.5 (CH, *d*, *J* = 10 Hz), 47.3 (CH<sub>2</sub>), 36.2 (CH, *d*, *J* = 18 Hz), 31.5 (CH<sub>2</sub>, *d*,

$J = 27$  Hz), 28.5 (CH<sub>2</sub>,  $d$ ,  $J = 8$  Hz), 21.5 (CH<sub>3</sub>), 15.4 (CH<sub>3</sub>,  $d$ ,  $J = 9$  Hz); <sup>19</sup>F NMR (376 MHz, CDCl<sub>3</sub>)  $\delta$  -146.73; HRMS (ESI)  $m/z$ : 706.19130 [M + Na]<sup>+</sup>, calcd. for C<sub>38</sub>H<sub>35</sub>O<sub>4</sub>N<sub>3</sub>ClFNaS; Found 706.19294.

**(3a'R,4S,4'S,6'R,7'R,7a'R)-3a'-fluoro-3-methyl-1,6'-diphenyl-7'-(p-tolyl)-1'-tosyl-2',3',3a',4',6',7'-hexahydro-1'H-spiro[pyrazole-4,5'-[7a,4](epoxyethano)indol]-5(1H)-one (6x):**

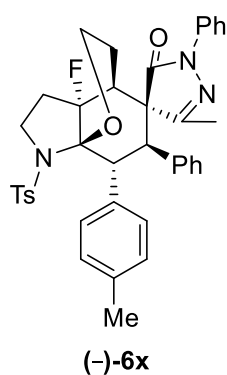

Prepared by following general procedure **C** purified by column chromatography using EtOAc/hexane and isolated product **6x** in 48% yield as a white solid with **M. P.** 191 - 194 °C. The enantiomeric excess (*ee*) was determined by chiral stationary phase **HPLC** using a Daicel Chiralpak IC column (hexane/EtOAc = 65:35, flow rate 0.5 mL/min,  $\lambda = 254$  nm),  $t_R = 13.657$  min (major),  $t_R = 22.293$  min (minor),  $[\alpha]_D^{25} = -104.332$  (CHCl<sub>3</sub>,  $c = 0.44$  g/100ml for 92% *ee*); **IR (neat)**  $\nu_{max}$  2924, 1697, 1597, 1496, 1157 and 663 cm<sup>-1</sup>; **<sup>1</sup>H NMR (400 MHz, CDCl<sub>3</sub>)**  $\delta$  7.34 – 7.30 (1H, m), 7.23 – 7.18 (4H, m), 7.15 – 6.96 (11H, m), 6.86 (2H,  $d$ ,  $J = 7.9$  Hz), 4.83 – 4.76 (1H, m), 4.56 (1H,  $d$ ,  $J = 11.4$  Hz), 3.85 - 3.72 (3H, m), 3.54 – 3.47 (1H, m), 2.83 - 2.60 (2H, m), 2.35 (3H, s), 2.31 (3H,  $d$ ,  $J = 5$  Hz), 2.26 - 2.20 (4H, m), 2.17 - 2.08 (1H, m), 2.01- 1.92 (1H, m). **<sup>13</sup>C NMR (100 MHz, CDCl<sub>3</sub>, DEPT-135)**  $\delta$  172.0 (C, N-C=O), 162.1 (C, C=N), 142.9 (C), 139.1 (C), 136.9 (C), 136.8 (C), 135.9 (C), 135.2 (C), 130.9 (CH), 129.9 (2CH), 128.8 (2CH), 128.4 (3CH), 128.2 (3CH), 127.7 (2CH), 127.5 (CH), 125.4 (CH), 120.0 (3CH), 103.5 (C-F,  $d$ ,  $J = 187$  Hz), 97.1 (C-O,  $d$ ,  $J = 20$  Hz), 62.5 (C), 59.6 (CH<sub>2</sub>), 54.3 (CH), 51.5 (CH,  $d$ ,  $J = 9$  Hz), 47.2 (CH<sub>2</sub>), 36.3 (CH,  $d$ ,  $J = 18$  Hz), 31.5 (CH<sub>2</sub>,  $d$ ,  $J = 26$  Hz), 28.5 (CH<sub>2</sub>,  $d$ ,  $J = 7$  Hz), 21.5 (CH<sub>3</sub>), 21.1 (CH<sub>3</sub>), 15.4 (CH<sub>3</sub>,  $d$ ,  $J = 9$  Hz); <sup>19</sup>F NMR (376 MHz, CDCl<sub>3</sub>)  $\delta$  -146.67; HRMS (ESI)  $m/z$ : 686.24593 [M + Na]<sup>+</sup>, calcd. for C<sub>39</sub>H<sub>38</sub>O<sub>4</sub>N<sub>3</sub>FNaS; Found 686.24442.

**(3a'R,4S,4'S,6'R,7'R,7a'R)-3a'-fluoro-6'-(4-fluorophenyl)-3-methyl-7'-phenyl-1'-tosyl-1-(4-(trifluoromethyl)phenyl)-2',3',3a',4',6',7'-hexahydro-1'H-spiro[pyrazole-4,5'-[7a,4](epoxyethano)indol]-5(1H)-one (6y):**

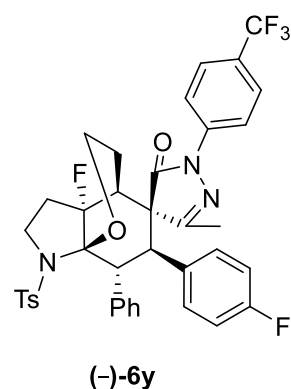

Prepared by following general procedure **C** purified by column chromatography using EtOAc/hexane and isolated product **6y** in 53% yield as a white solid with **M. P.** 185 - 188 °C. The enantiomeric excess (*ee*) was determined by chiral stationary phase **HPLC** using a Daicel Chiralpak IC column (hexane/EtOAc = 65:35, flow rate 0.5 mL/min,  $\lambda = 254$  nm),  $t_R = 10.851$  min (major),  $t_R = 12.158$  min (minor),  $[\alpha]_D^{25} = -148.585$  (CHCl<sub>3</sub>,  $c = 0.89$  g/100ml for 96% *ee*); **IR (neat)**  $\nu_{max}$  2924, 1712, 1612, 1159 and 754 cm<sup>-1</sup>; **<sup>1</sup>H NMR (400 MHz, CDCl<sub>3</sub>)**  $\delta$  7.61 (2H,  $d$ ,  $J = 8.6$  Hz), 7.49 (2H,  $d$ ,  $J = 8.7$  Hz), 7.16 – 7.82 (11H, m), 6.73 (2H,  $t$ ,  $J = 7.7$  Hz), 4.70 (1H, quint,  $J = 6.6$  Hz), 4.52 (1H,  $d$ ,  $J = 11.5$  Hz), 3.84 – 3.70 (3H, m), 3.50 (1H, sext,  $J = 6.6$  Hz), 2.85 - 2.82 (1H, m), 2.68 (1H,  $dq$ ,  $J = 13.3$  Hz), 2.35 (3H, s), 2.32 – 2.31 (3H,  $d$ ,  $J = 4.5$  Hz), 2.23 – 2.11 (2H, m), 2.03 – 1.94 (1H, m); **<sup>13</sup>C NMR (100 MHz, CDCl<sub>3</sub>, DEPT-135)**  $\delta$  172.2 (C, N-C=O), 162.6 (C, C=N), 161.9 (C-F,  $d$ ,  $J = 245.2$

Hz), 143.2 (C), 141.7 (C), 139.8 (C), 136.6 (C), 131.6 (C), 131.4 (CH, d,  $J = 8$  Hz), 131.0 (CH, d,  $J = 5.6$  Hz), 129.0 (3CH), 128.2 (2CH), 127.7 (2CH), 126.7 (C, q,  $J = 32.4$  Hz), 126.1 (CH), 125.8 (2CH, q,  $J = 3.8$  Hz), 124.0 (C-F<sub>3</sub>, q,  $J = 270$  Hz), 118.6 (3CH), 114.7 (2CH, d,  $J = 21.2$  Hz), 103.6 (C-F, d,  $J = 186.8$  Hz), 97.0 (C-O, d,  $J = 20$  Hz), 62.8 (C), 59.3 (CH<sub>2</sub>), 55.5 (CH), 50.9 (CH, d,  $J = 10$  Hz), 47.1 (CH<sub>2</sub>), 36.2 (CH, d,  $J = 18$  Hz), 31.5 (CH<sub>2</sub>, d,  $J = 26.5$  Hz), 28.5 (CH<sub>2</sub>, d,  $J = 7.8$  Hz), 21.5 (CH<sub>3</sub>), 15.3 (CH<sub>3</sub>, d,  $J = 8.4$  Hz); <sup>19</sup>F NMR (376MHz, CDCl<sub>3</sub>) δ -62.2, -114.3, -146.19; HRMS (ESI) m/z: 758.20824 [M + Na]<sup>+</sup>, calcd. for C<sub>39</sub>H<sub>34</sub>N<sub>3</sub>O<sub>4</sub>SF<sub>5</sub>Na; Found 758.20765.

**1'-(tert-butyl) 5-ethyl (3a*S*,4*R*,5*R*,6a*R*,9a*S*)-6a-fluoro-2'-oxo-9-tosyl-3,3a,5,6,6a,7,8,9-octahydro-2*H*-spiro[furo[3,2-*h*]indole-4,3'-indoline]-1',5-dicarboxylate (6'a):**

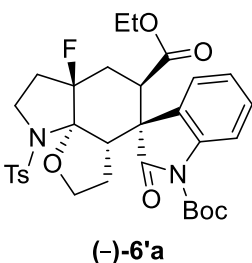

Prepared by following general procedure **C** purified by column chromatography using EtOAc/hexane and isolated product **6'a** in 69% yield as a white solid with **M. P.** 110 – 113 °C. The enantiomeric excess (*ee*) was determined by chiral stationary phase **HPLC** using a Daicel Chiralpak IC column (hexane/EtOAc = 75:25, flow rate 0.5 mL/min, λ = 254 nm), *t<sub>R</sub>* = 11.761 min (major), *t<sub>R</sub>* = 19.739 min (minor), [α]<sub>D</sub><sup>25</sup> = -27.450 (CHCl<sub>3</sub>, *c* = 0.99 g/100ml for 99.9% *ee*); **IR** (neat)  $\nu_{\max}$  2978, 1766, 1728, 1477, 1149 and 667 cm<sup>-1</sup>; <sup>1</sup>H NMR (400 MHz, CDCl<sub>3</sub>) δ

7.84 (1H, d,  $J = 7.2$  Hz), 7.72 (2H, d,  $J = 8.4$  Hz), 7.49 (1H, d,  $J = 7.2$  Hz), 7.33 (1H, ddd,  $J = 1.2, 1.2, 1.2$  Hz), 7.28-7.25 (2H, m), 7.18 (1H, ddd,  $J = 1.2, 1.2, 1.2$  Hz), 3.99-3.95 (2H, m), 3.86-3.66 (4H, m), 3.46-3.39 (2H, m), 2.80-2.67 (1H, m), 2.61-2.48 (2H, m), 2.41 (3H, s), 2.29-2.21 (1H, m), 2.03-1.90 (2H, m), 1.67 (9H, s), 0.89 (3H, t,  $J = 7.2$  Hz); <sup>13</sup>C NMR (100 MHz, CDCl<sub>3</sub>, DEPT-135) δ 176.0 (C, C=O), 170.9 (C, C=O), 149.2 (C, C=O), 143.9 (C), 138.8 (C), 135.5 (C), 129.6 (C), 129.3 (2CH), 128.7 (CH), 128.6 (2CH), 125.6 (CH), 124.3 (CH), 114.6 (CH), 97.4 (C, d,  $J = 194$  Hz), 97.3 (C, d,  $J = 21$  Hz), 84.4 (C), 66.3 (CH<sub>2</sub>), 61.3 (CH<sub>2</sub>), 50.3 (C), 44.6 (CH, d,  $J = 7$  Hz), 43.2 (CH), 38.6 (CH), 31.0 (CH<sub>2</sub>, d,  $J = 8$  Hz), 30.8 (CH<sub>2</sub>, d,  $J = 5$  Hz), 28.8 (CH<sub>2</sub>, d,  $J = 4$  Hz), 28.2 (3CH<sub>3</sub>), 21.6 (CH<sub>3</sub>), 13.3 (CH<sub>3</sub>); <sup>19</sup>F NMR (376MHz, CDCl<sub>3</sub>) δ -159.76; **HRMS** (ESI) m/z: 651.2147 [M + Na]<sup>+</sup>, calcd. for C<sub>32</sub>H<sub>37</sub>N<sub>2</sub>O<sub>8</sub>SFNa; Found 651.2127.

**1'-(tert-butyl) 5-ethyl (3a*S*,4*R*,5*R*,6a*R*,9a*S*)-5',6a-difluoro-2'-oxo-9-tosyl-3,3a,5,6,6a,7,8,9-octahydro-2*H*-spiro[furo[3,2-*h*]indole-4,3'-indoline]-1',5-dicarboxylate (6'b):**

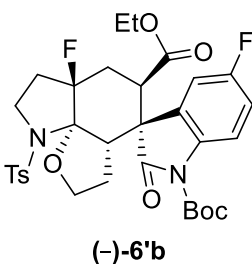

Prepared by following general procedure **C** purified by column chromatography using EtOAc/hexane and isolated product **6'b** in 44% yield as a white solid with **M. P.** 111 – 114 °C. The enantiomeric excess (*ee*) was determined by chiral stationary phase **HPLC** using a Daicel Chiralpak IA column (hexane/EtOAc = 75:25, flow rate 0.5 mL/min, λ = 254 nm), *t<sub>R</sub>* = 11.804 min (minor), *t<sub>R</sub>* = 13.065 min (major), [α]<sub>D</sub><sup>25</sup> = -26.560 (CHCl<sub>3</sub>, *c* = 0.64 g/100ml for 98% *ee*); **IR** (neat)  $\nu_{\max}$  2924, 1766, 1728, 1477, 1145 and 667 cm<sup>-1</sup>; <sup>1</sup>H NMR (400 MHz, CDCl<sub>3</sub>) δ

7.85 (1H, dd,  $J = 4.8, 4.8$  Hz), 7.74 (2H, d,  $J = 8.4$  Hz), 7.27 (2H, d,  $J = 7.6$  Hz), 7.22 (1H, dd,  $J = 2.8, 2.8$  Hz), 7.05 (1H, ddd,  $J = 2.8, 2.8, 2.8$  Hz), 4.01-3.97 (2H, m), 3.91-3.81 (2H, m), 3.77 (1H, dd,  $J = 7.6, 7.6$  Hz), 3.70 (1H, dd,  $J = 4.4, 4.4$  Hz), 3.47-3.35 (2H, m), 2.78-2.68 (1H, m), 2.60 (1H, dtd,  $J = 4.4, 4.4, 4.4$  Hz), 2.41 (3H, s), 2.39-2.20 (2H, m), 2.02-1.91 (2H, m), 1.66 (9H, s), 0.93 (3H, t,  $J = 7.2$  Hz);  $^{13}\text{C}$  NMR (100 MHz,  $\text{CDCl}_3$ , DEPT-135)  $\delta$  175.6 (C, C=O), 170.7 (C, C=O), 159.2 (C-F, d,  $J = 242$  Hz), 149.1 (C, C=O), 144.0 (C), 135.1 (C), 134.9 (C, d,  $J = 2$  Hz), 131.2 (C, d,  $J = 8$  Hz), 129.3 (2CH), 128.7 (2CH), 115.7 (CH, d,  $J = 8$  Hz), 115.1 (CH, d,  $J = 22$  Hz), 113.7 (CH, d,  $J = 25$  Hz), 97.3 (C, d,  $J = 194$  Hz), 97.2 (C, d,  $J = 21$  Hz), 84.6 (C), 66.4 ( $\text{CH}_2$ ), 61.4 ( $\text{CH}_2$ ), 50.5 (C), 44.5 ( $\text{CH}_2$ , d,  $J = 7$  Hz), 43.0 (CH), 38.5 (CH), 30.9 ( $\text{CH}_2$ , d,  $J = 25$  Hz), 30.8 ( $\text{CH}_2$ , d,  $J = 22$  Hz), 28.7 ( $\text{CH}_2$ , d,  $J = 3$  Hz), 28.1 (3 $\text{CH}_3$ ), 21.6 ( $\text{CH}_3$ ), 13.4 ( $\text{CH}_3$ );  $^{19}\text{F}$  NMR (376MHz,  $\text{CDCl}_3$ )  $\delta$  -117.41, -159.75; HRMS (ESI)  $m/z$ : 669.2053 [ $\text{M} + \text{Na}$ ] $^+$ , calcd. for  $\text{C}_{32}\text{H}_{36}\text{N}_2\text{O}_8\text{SF}_2\text{Na}$ ; Found 669.2062.

**1'-(tert-butyl) 5-ethyl (3aS,4R,5R,6aR,9aS)-6a-fluoro-5'-methoxy-2'-oxo-9-tosyl-3,3a,5,6,6a,7,8,9-octahydro-2H-spiro[furo[3,2-h]indole-4,3'-indoline]-1',5-dicarboxylate (6'c):**

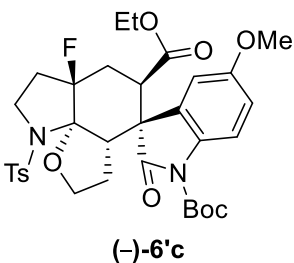

Prepared by following general procedure **C** purified by column chromatography using EtOAc/hexane and isolated product **6'c** in 45% yield as a white solid with **M. P.** 114 – 117 °C. The enantiomeric excess (ee) was determined by chiral stationary phase **HPLC** using a Daicel Chiralpak IA column (hexane/EtOAc = 75:25, flow rate 0.5 mL/min,  $\lambda = 254$  nm),  $t_R = 14.047$  min (minor),  $t_R = 15.433$  min (major),  $[\alpha]_D^{25} = -24.102$  ( $\text{CHCl}_3$ ,  $c = 0.67$  g/100ml for 93% ee); IR (neat)  $\nu_{\text{max}}$  2978, 1766, 1728, 1485, 1153 and

667  $\text{cm}^{-1}$ ;  $^1\text{H}$  NMR (400 MHz,  $\text{CDCl}_3$ )  $\delta$  7.77 (1H, d,  $J = 9.2$  Hz), 7.73 (2H, d,  $J = 8.4$  Hz), 7.27 (2H, d,  $J = 8$  Hz), 7.04 (1H, d,  $J = 2.4$  Hz), 6.86 (1H, dd,  $J = 2.4, 2.4$  Hz), 4.0-3.95 (2H, m), 3.87 (3H, s), 3.85-3.75 (3H, m), 3.66 (1H, dd,  $J = 4.4, 4.4$  Hz), 3.44 (2H, dd,  $J = 3.2, 3.2$  Hz), 2.80-2.67 (1H, m), 2.61-2.43 (2H, m), 2.41 (3H, s), 2.28-2.21 (1H, m), 2.02-1.91 (2H, m), 1.66 (9H, s), 0.91 (3H, t,  $J = 7.2$  Hz);  $^{13}\text{C}$  NMR (100 MHz,  $\text{CDCl}_3$ , DEPT-135)  $\delta$  176.0 (C, C=O), 170.8 (C, C=O), 156.2 (C), 149.2 (C, C=O), 143.9 (C), 135.5 (C), 132.2 (C), 130.7 (C), 129.3 (2CH), 128.7 (2CH), 115.4 (CH), 113.9 (CH), 111.7 (CH), 97.3 (C, d,  $J = 194$  Hz), 97.3 (C, d,  $J = 22$  Hz), 84.1 (C), 66.4 ( $\text{CH}_2$ ), 61.3 ( $\text{CH}_2$ ), 55.5 ( $\text{CH}_3$ ), 50.6 (C), 44.7 ( $\text{CH}_2$ , d,  $J = 7$  Hz), 43.2 (CH), 38.6 (CH), 31.1 ( $\text{CH}_2$ , d,  $J = 4$  Hz), 30.8 ( $\text{CH}_2$ ), 28.9 ( $\text{CH}_2$ , d,  $J = 4$  Hz), 28.2 (3 $\text{CH}_3$ ), 21.6 ( $\text{CH}_3$ ), 13.3 ( $\text{CH}_3$ );  $^{19}\text{F}$  NMR (376MHz,  $\text{CDCl}_3$ )  $\delta$  -159.66; HRMS (ESI)  $m/z$ : 681.2253 [ $\text{M} + \text{Na}$ ] $^+$ , calcd. for  $\text{C}_{33}\text{H}_{39}\text{N}_2\text{O}_9\text{SFNa}$ ; Found 681.2234.

**(4R,5R,6R,7R)-4-(2-hydroxyethyl)-3'-methyl-1',6,7-triphenyl-1,4,6,7-tetrahydrospiro[indole-5,4'-pyrazol]-5'(1'H)-one :**

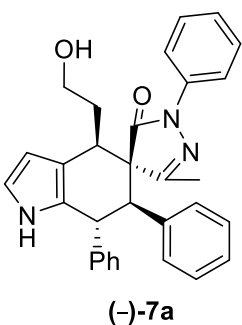

Prepared by following general procedure **D** purified by column chromatography using EtOAc/hexane and isolated product **7a** in 30% yield as a white solid with **M. P.** 95 - 98 °C.  $[\alpha]_D^{25} = -250.000$  (CHCl<sub>3</sub>, *c* = 0.1 g/100ml); **IR (neat)**  $\nu_{\max}$  3332, 2920, 1685, 1492, 1365, 1292 and 698 cm<sup>-1</sup>; **<sup>1</sup>H NMR (400 MHz, CDCl<sub>3</sub>)**  $\delta$  7.75 (2H, d, *J* = 7.6 Hz), 7.57 (1H, s), 7.36 (2H, t, *J* = 8.4 Hz), 7.19 – 6.81 (12H, m), 6.69 (1H, t, *J* = 2 Hz), 6.17 (1H, t, *J* = 2.8 Hz), 4.86 (1H, d, *J* = 10.8 Hz), 3.95 (2H, q, *J* = 7.2 Hz), 3.66 (1H, d, *J* = 8.4 Hz), 2.08 (3H, s), 2.01 – 1.96 (2H, m); **<sup>13</sup>C NMR (100 MHz, CDCl<sub>3</sub>, DEPT-135)**  $\delta$  173.1 (C, C=O), 162.0 (C, C=N), 141.0 (C), 137.8 (C), 137.4 (C), 129.0 (2CH), 128.8 (C), 128.7 (3CH), 128.3 (4CH), 127.5 (CH), 126.9 (CH), 125.0 (CH), 119.2 (3CH), 117.7 (CH), 116.7 (C), 105.6 (CH), 62.7 (C), 61.4 (CH<sub>2</sub>), 55.2 (CH), 43.2 (CH), 35.7 (CH), 34.6 (CH<sub>2</sub>), 14.2 (CH<sub>3</sub>); **HRMS (ESI)** *m/z*: 498.21520 [M + Na]<sup>+</sup>, calcd. for C<sub>31</sub>H<sub>29</sub>O<sub>2</sub>N<sub>3</sub>Na; Found 498.21195.

**(3a'R,4S,4'S,6'R,7'R,7a'R)-2',3',3a'-tribromo-3-methyl-1,6',7'-triphenyl-3a',4',6',7'-tetrahydro-1'H-spiro[pyrazole-4,5'-[7a,4](epoxyethano)indol]-5(1H)-one :**

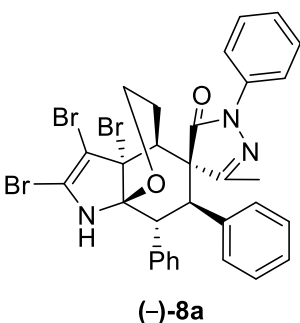

Prepared by following general procedure **E** purified by column chromatography using EtOAc/hexane and isolated product **8a** in 25% yield as a white solid with **M. P.** 111 - 114 °C.  $[\alpha]_D^{25} = -80.000$  (CHCl<sub>3</sub>, *c* = 0.1 g/100ml); **IR (neat)**  $\nu_{\max}$  3267, 2920, 1681, 1597, 1049, and 694 cm<sup>-1</sup>; **<sup>1</sup>H NMR (400 MHz, CDCl<sub>3</sub>)**  $\delta$  8.18 (1H, s), 7.61 (2H, d, *J* = 8 Hz), 7.35 (2H, t, *J* = 7.6 Hz), 7.20 – 6.62 (12H, m), 4.91 (1H, d, *J* = 11.2 Hz), 3.90 – 3.84 (1H, m), 3.76 - 3.70 (1H, m), 3.64 (1H, br s), 3.30 (1H, d, *J* = 10.8 Hz), 2.54 - 2.46 (1H, m), 2.10 (3H, s), 1.81 (1H, sext, *J* = 8.8 Hz); **<sup>13</sup>C NMR (100 MHz, CDCl<sub>3</sub>, DEPT-135)**  $\delta$  173.3 (C, C=O), 162.4 (C, C=N), 139.7 (C), 137.4 (C), 136.2 (C), 131.0 (C), 129.2 (CH), 128.8 (4CH), 128.5 (2CH), 128.3 (CH), 127.8 (CH), 127.4 (2CH), 125.4 (CH), 119.4 (3CH), 116.3 (C), 100.7 (C), 96.7 (C), 62.6 (C), 61.4 (CH<sub>2</sub>), 54.9 (CH), 42.4 (CH), 35.7 (CH), 32.5 (CH<sub>2</sub>), 14.4 (CH<sub>3</sub>); **HRMS (ESI)** *m/z*: 656.0342 [M - Br + Na]<sup>+</sup>, calcd. for C<sub>31</sub>H<sub>27</sub>N<sub>3</sub>O<sub>2</sub>Br<sup>81</sup>BrNa; Found 656.0321.

**(3a'R,4S,4'S,6'R,7'R,7a'R)-2',3',3a'-tribromo-1-(3-chlorophenyl)-3-methyl-6',7'-diphenyl-3a',4',6',7'-tetrahydro-1'H-spiro[pyrazole-4,5'-[7a,4](epoxyethano)indol]-5(1H)-one (8b):**

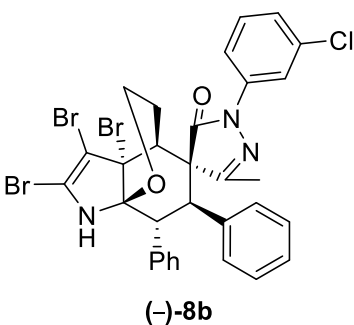

Prepared by following general procedure **E** purified by column chromatography using EtOAc/hexane and isolated product **8b** in 37% yield as a white solid with **M. P.** 120 - 123 °C.  $[\alpha]_D^{25} = -92.647$  (CHCl<sub>3</sub>, *c* = 0.136 g/100ml); **IR (neat)**  $\nu_{\max}$  3271, 2924, 1689, 1593, 1481 and 698 cm<sup>-1</sup>; **<sup>1</sup>H NMR (400 MHz, CDCl<sub>3</sub>)**  $\delta$  7.82 (1H, s), 7.76 (1H, s), 7.66 (1H, d, *J* = 8 Hz), 7.29 (1H, t, *J* = 8 Hz), 7.16 – 7.13 (4H, m), 7.07-6.97 (4H,

m), 4.90 (1H, d,  $J = 11.2$  Hz), 3.87 (1H, sept,  $J = 6$  Hz), 3.75 - 3.65 (2H, m), 3.34 (1H, d,  $J = 10.8$  Hz), 2.50 - 2.40 (1H, m), 2.12 (3H, s), 1.82 (1H, sept,  $J = 9.2$  Hz);  **$^{13}\text{C}$  NMR (100 MHz,  $\text{CDCl}_3$ , DEPT-135)**  $\delta$  173.5 (C, C=O), 162.7 (C, C=N), 139.3 (C), 138.5 (C), 136.0 (C), 134.6 (C), 131.2 (C), 129.9 (2CH), 129.1 (CH), 128.6 (2CH), 128.4 (CH), 127.9 (CH), 127.5 (CH), 125.2 (2CH), 119.1 (2CH), 116.9 (2CH), 116.3 (C), 100.6 (C), 96.9 (C), 62.8 (C), 61.3 ( $\text{CH}_2$ ), 54.7 (CH), 42.3 (CH), 35.8 (CH), 32.4 ( $\text{CH}_2$ ), 14.4 ( $\text{CH}_3$ ); **HRMS (ESI)**  $m/z$ : 689.9952 [ $\text{M} - \text{Br} + \text{Na}$ ] $^+$ , calcd. for  $\text{C}_{31}\text{H}_{26}\text{N}_3\text{O}_2\text{Br}^{81}\text{BrClNa}$ ; Found 689.9930.

Single Crystal X-ray data for the product (-)-6i

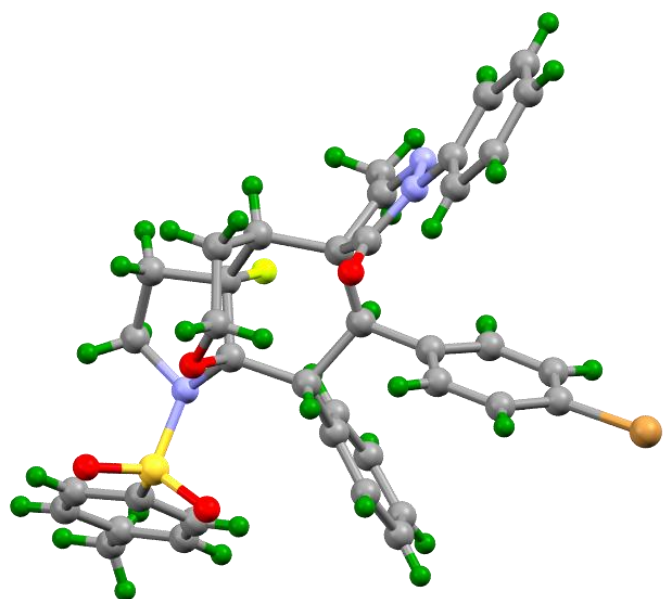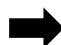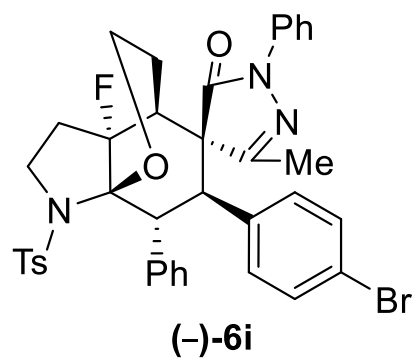

|                             |                                                                                                                           |
|-----------------------------|---------------------------------------------------------------------------------------------------------------------------|
| Identification code         | shelx                                                                                                                     |
| Empirical formula           | C <sub>38</sub> H <sub>35</sub> Br F N <sub>3</sub> O <sub>4</sub> S                                                      |
| Formula weight              | 728.66                                                                                                                    |
| Temperature                 | 297(2) K                                                                                                                  |
| Wavelength                  | 0.71073 Å                                                                                                                 |
| Crystal system, space group | Monoclinic, P 2 <sub>1</sub>                                                                                              |
| Unit cell dimensions        | a = 11.2594(6) Å    alpha = 90 deg.<br>b = 17.7861(11) Å    beta = 92.839(2) deg.<br>c = 17.1349(10) Å    gamma = 90 deg. |
| Volume                      | 3427.2(3) Å <sup>3</sup>                                                                                                  |
| Z, Calculated density       | 4, 1.412 Mg/m <sup>3</sup>                                                                                                |
| Absorption coefficient      | 1.311 mm <sup>-1</sup>                                                                                                    |
| F(000)                      | 1504                                                                                                                      |
| Crystal size                | 0.495 x 0.295 x 0.013 mm                                                                                                  |

|                                   |                                             |
|-----------------------------------|---------------------------------------------|
| Theta range for data collection   | 3.304 to 25.999 deg.                        |
| Limiting indices                  | -13<=h<=13, -21<=k<=21, -21<=l<=21          |
| Reflections collected / unique    | 103711 / 13400 [R(int) = 0.1115]            |
| Completeness to theta             | = 25.242 99.7 %                             |
| Absorption correction             | Semi-empirical from equivalents             |
| Max. and min. transmission        | 0.738 and 0.663                             |
| Refinement method                 | Full-matrix least-squares on F <sup>2</sup> |
| Data / restraints / parameters    | 13400 / 1 / 870                             |
| Goodness-of-fit on F <sup>2</sup> | 1.007                                       |
| Final R indices [I>2sigma(I)]     | R1 = 0.0463, wR2 = 0.0849                   |
| R indices (all data)              | R1 = 0.0718, wR2 = 0.0942                   |
| Absolute structure parameter      | 0.026(8)                                    |
| Extinction coefficient            | n/a                                         |
| Largest diff. peak and hole       | 0.255 and -0.399 e.A <sup>-3</sup>          |
