# Supplementary material for: El cortijo andaluz: : su origen, desarrollo y transformaciones recientes en la campiña de Córdoba
Source: Royal Society of Chemistry journal article supplement (doi:10.1039/d2ob02058k), 1989-01-01
Supplement: d2ob02058k3.pdf [file d2ob02058k3.pdf]

## Supporting Information-III

### HPLC Data

#### Asymmetric synthesis of perhydroepoxyethanoindole cores *via* sequential [4+2]-addition/reduction/fluoroannulation reactions

Madavi S. Prasad,<sup>\*a</sup> and Murugesan Sivaprakash<sup>a</sup>

*Asymmetric Synthesis and Catalysis Laboratory, Department of Chemistry, Central University of Tamil Nadu, Thiruvavur, 610 005, India*

[shivaprasad@cutn.ac.in](mailto:shivaprasad@cutn.ac.in) and [shivacutn@gmail.com](mailto:shivacutn@gmail.com)

#### General Information:

The enantiomeric excess (ee) of the bridged bicyclic compounds **6a-6y** were determined by chiral stationary phase HPLC using a *Daicel Chiralpak IA & IC* in hexane/ethyl acetate as the eluent.

### HPLC Data of racemic **6a**

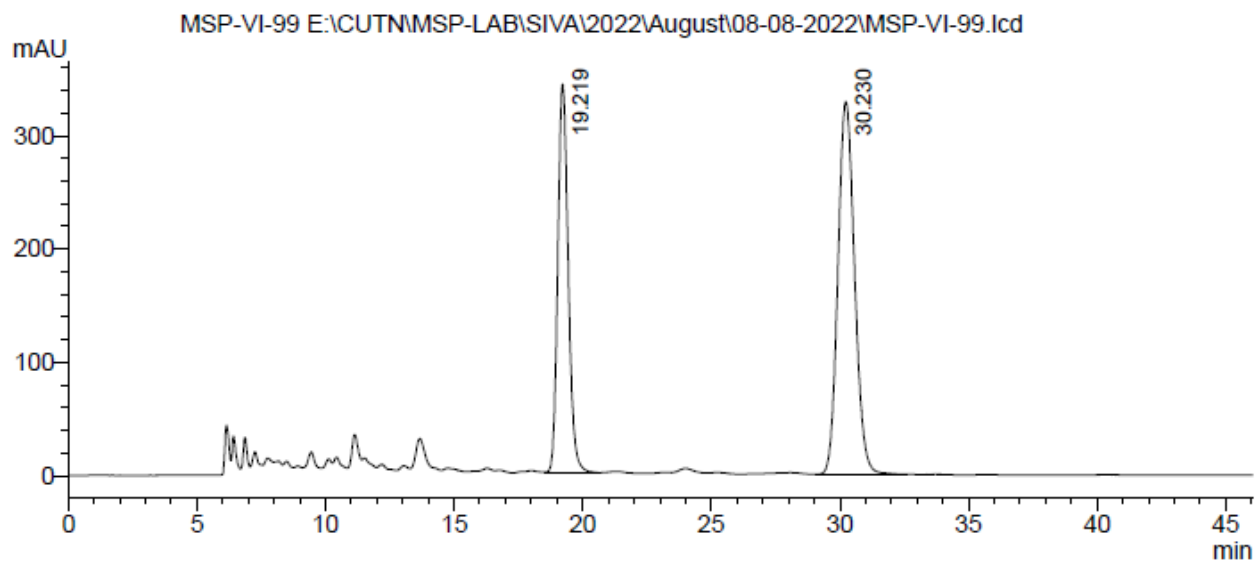

PDA Ch1 254nm

| Peak # | Ret. Time (min) | Area     | Height | Area%   |
|--------|-----------------|----------|--------|---------|
| 1      | 19.219          | 9807326  | 343725 | 39.816  |
| 2      | 30.230          | 14824047 | 328827 | 60.184  |
| Total  |                 | 24631373 | 672552 | 100.000 |

### HPLC Data of chiral **6a**: 93% *ee*

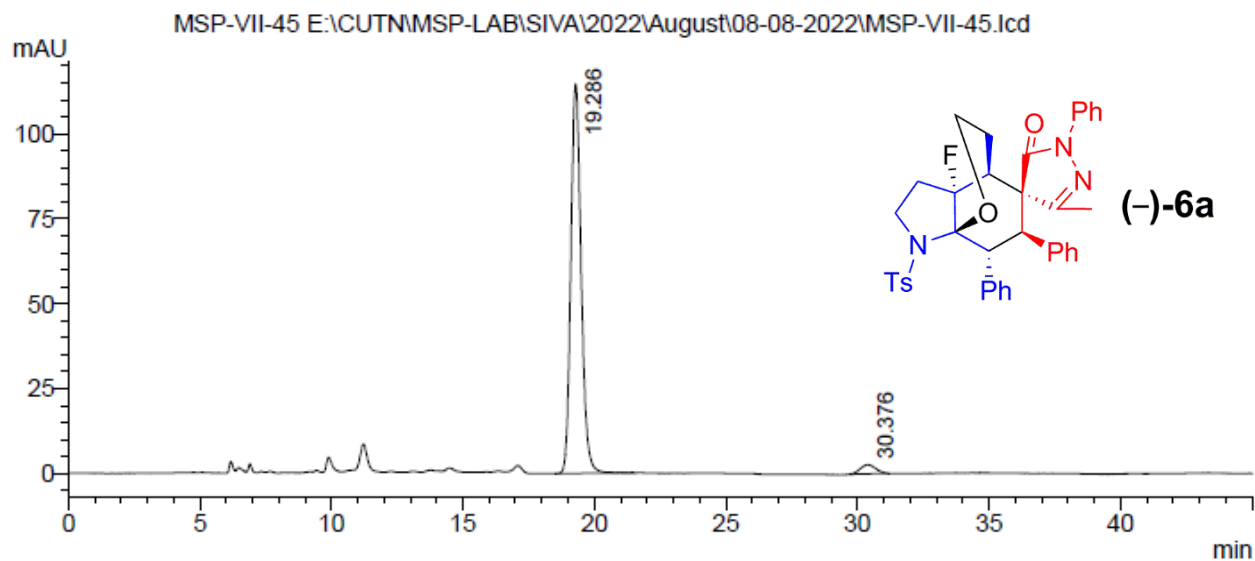

PDA Ch1 254nm

| Peak # | Ret. Time (min) | Area    | Height | Area%   |
|--------|-----------------|---------|--------|---------|
| 1      | 19.286          | 3130230 | 114612 | 96.634  |
| 2      | 30.376          | 109048  | 2650   | 3.366   |
| Total  |                 | 3239278 | 117261 | 100.000 |

### HPLC Data of racemic **6b**

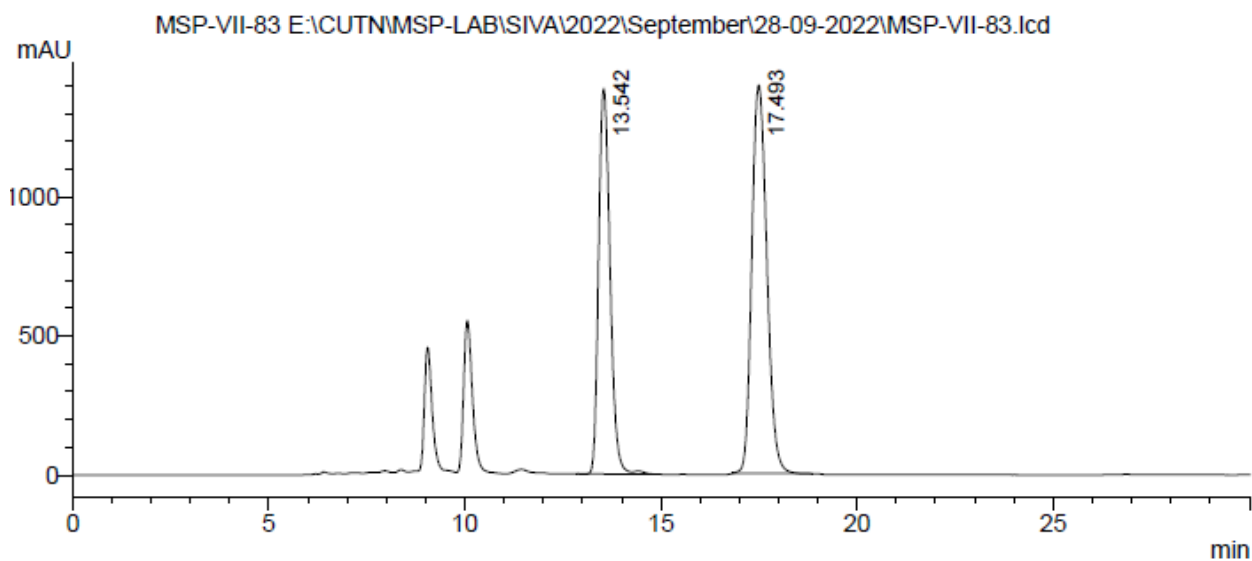

PDA Ch1 254nm

| Peak # | Ret. Time (min) | Area     | Height  | Area%   |
|--------|-----------------|----------|---------|---------|
| 1      | 13.542          | 28235547 | 1385839 | 43.062  |
| 2      | 17.493          | 37333655 | 1396647 | 56.938  |
| Total  |                 | 65569201 | 2782485 | 100.000 |

### HPLC Data of chiral **6b**: 93% *ee*

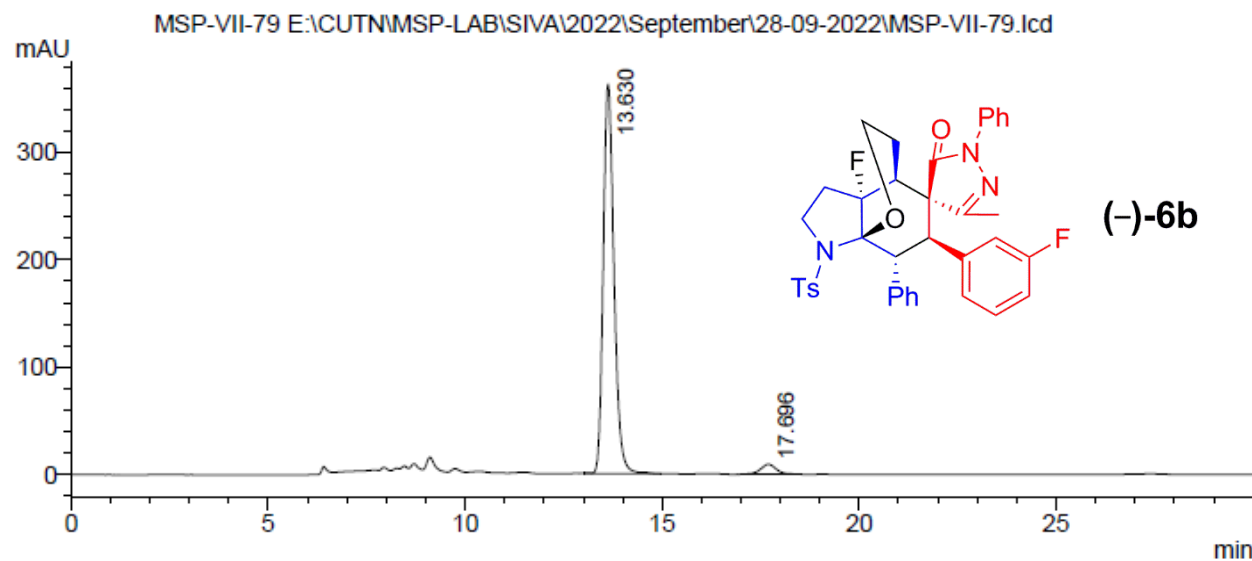

PDA Ch1 254nm

| Peak # | Ret. Time (min) | Area    | Height | Area%   |
|--------|-----------------|---------|--------|---------|
| 1      | 13.630          | 6874435 | 362577 | 96.571  |
| 2      | 17.696          | 244104  | 9162   | 3.429   |
| Total  |                 | 7118539 | 371739 | 100.000 |

HPLC Data of racemic **6c**

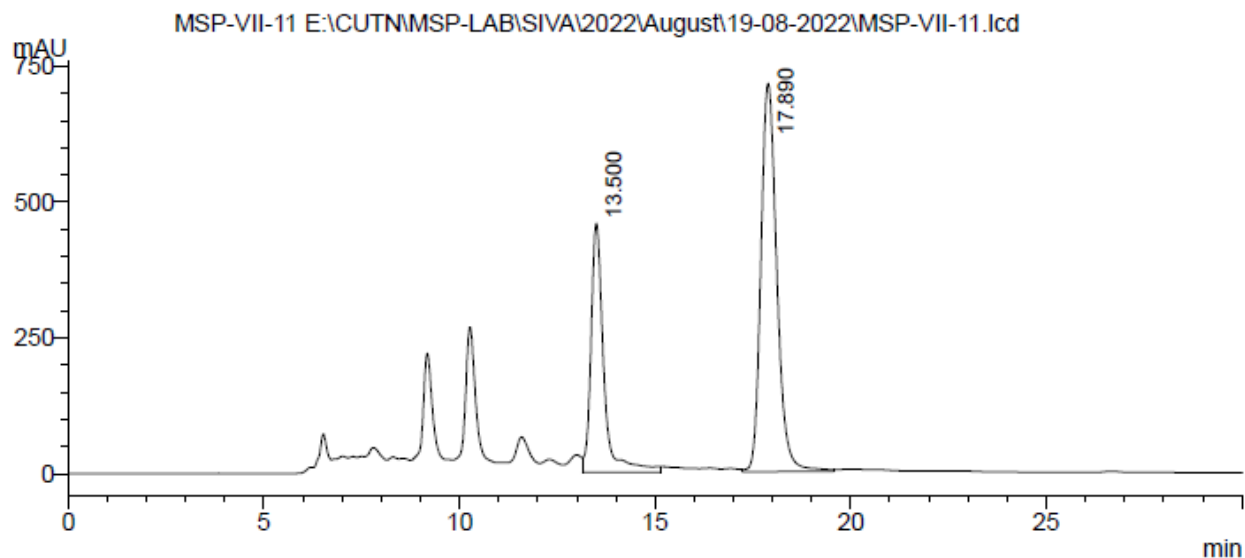

PDA Ch1 254nm

| Peak # | Ret. Time (min) | Area     | Height  | Area%   |
|--------|-----------------|----------|---------|---------|
| 1      | 13.500          | 10441246 | 457892  | 34.024  |
| 2      | 17.890          | 20246963 | 714970  | 65.976  |
| Total  |                 | 30688210 | 1172863 | 100.000 |

HPLC Data of chiral **6c**: 91% ee

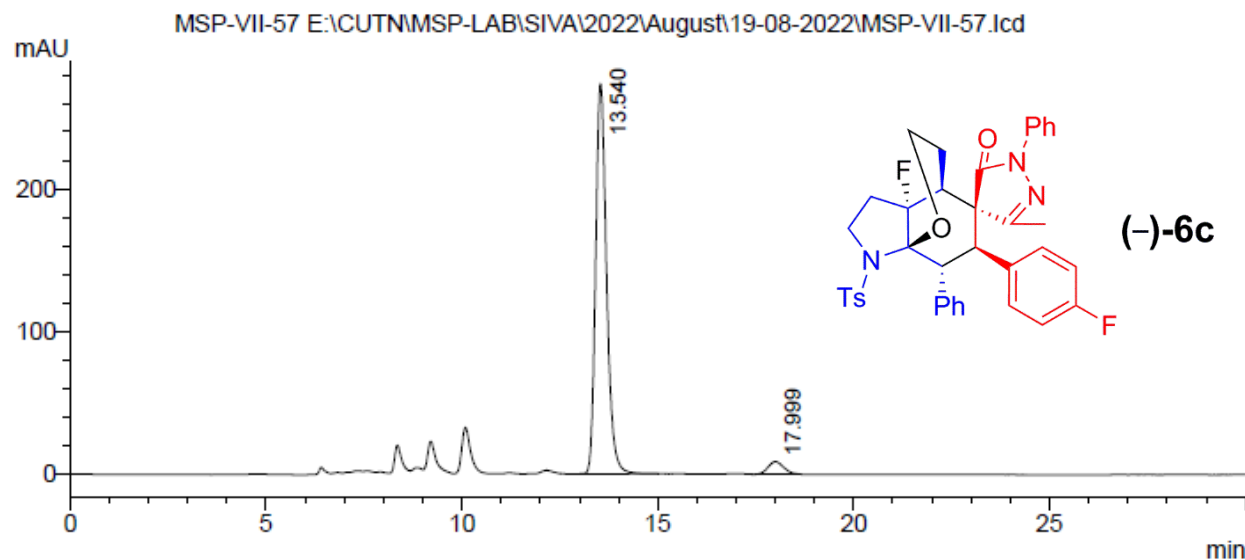

PDA Ch1 254nm

| Peak # | Ret. Time (min) | Area    | Height | Area%   |
|--------|-----------------|---------|--------|---------|
| 1      | 13.540          | 5319858 | 273692 | 95.708  |
| 2      | 17.999          | 238562  | 8762   | 4.292   |
| Total  |                 | 5558420 | 282453 | 100.000 |

### HPLC Data of racemic **6d**

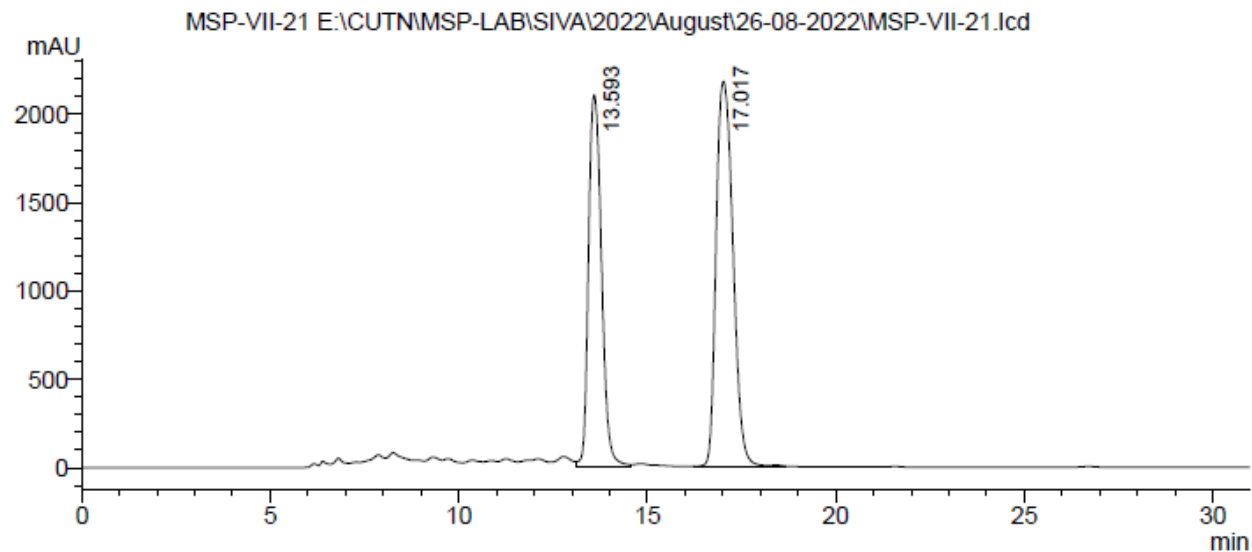

PDA Ch1 254nm

| Peak # | Ret. Time (min) | Area      | Height  | Area%   |
|--------|-----------------|-----------|---------|---------|
| 1      | 13.593          | 50881617  | 2108084 | 42.641  |
| 2      | 17.017          | 68444668  | 2184086 | 57.359  |
| Total  |                 | 119326284 | 4292170 | 100.000 |

### HPLC Data of chiral **6d**: 88% *ee*

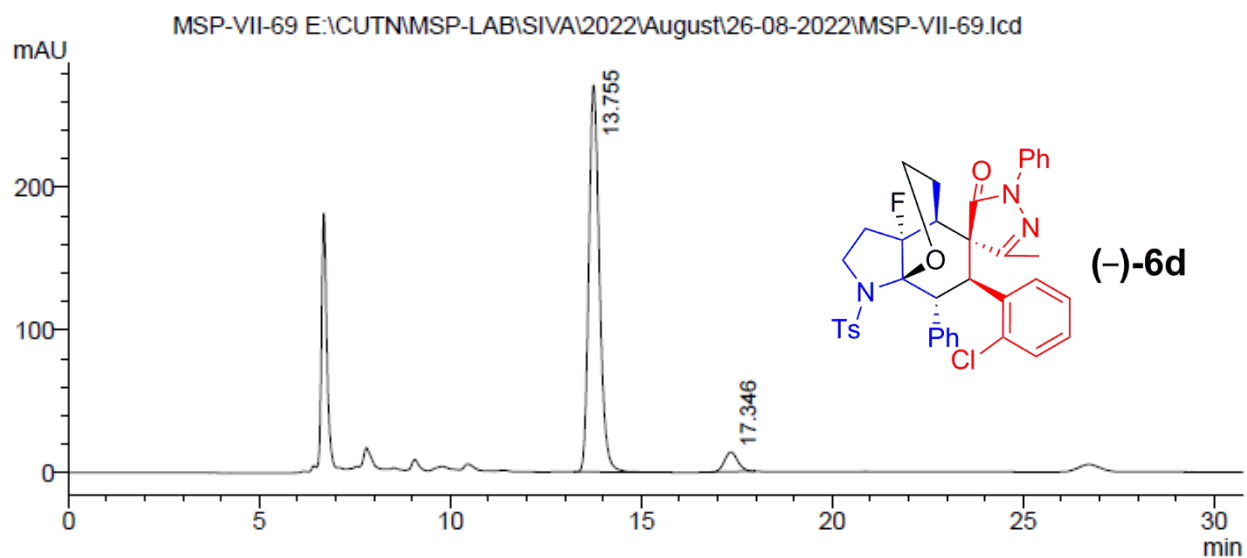

PDA Ch1 254nm

| Peak # | Ret. Time (min) | Area    | Height | Area%   |
|--------|-----------------|---------|--------|---------|
| 1      | 13.755          | 5212153 | 271104 | 93.949  |
| 2      | 17.346          | 335729  | 13718  | 6.051   |
| Total  |                 | 5547882 | 284822 | 100.000 |

### HPLC Data of racemic **6e**

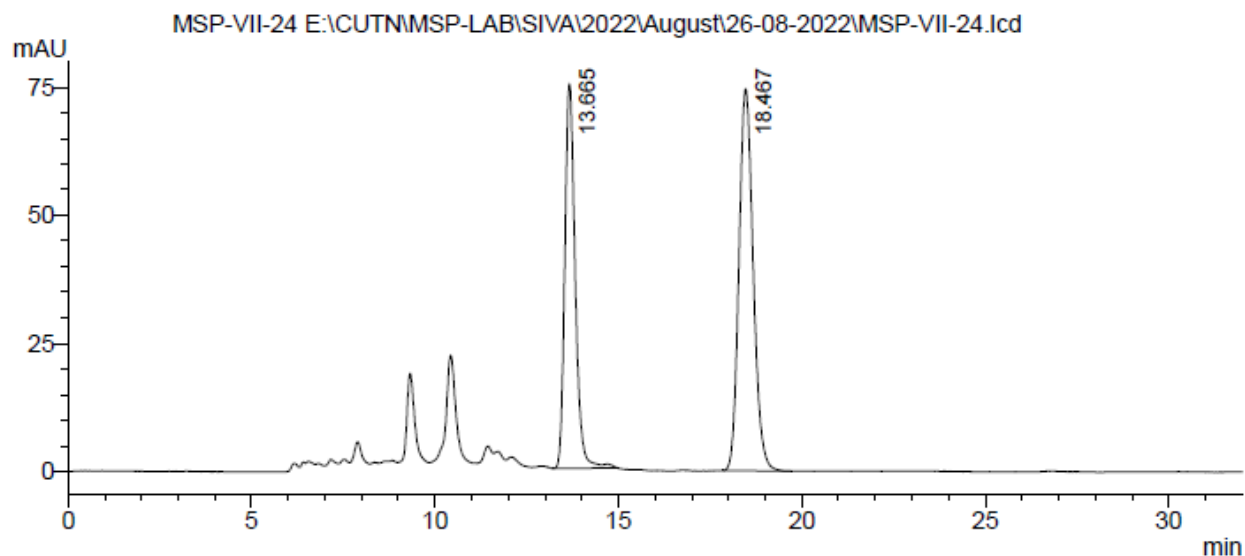

PDA Ch1 254nm

| Peak # | Ret. Time (min) | Area    | Height | Area%   |
|--------|-----------------|---------|--------|---------|
| 1      | 13.665          | 1479505 | 75068  | 42.425  |
| 2      | 18.467          | 2007818 | 74508  | 57.575  |
| Total  |                 | 3487323 | 149576 | 100.000 |

### HPLC Data of chiral **6e**: 92% ee

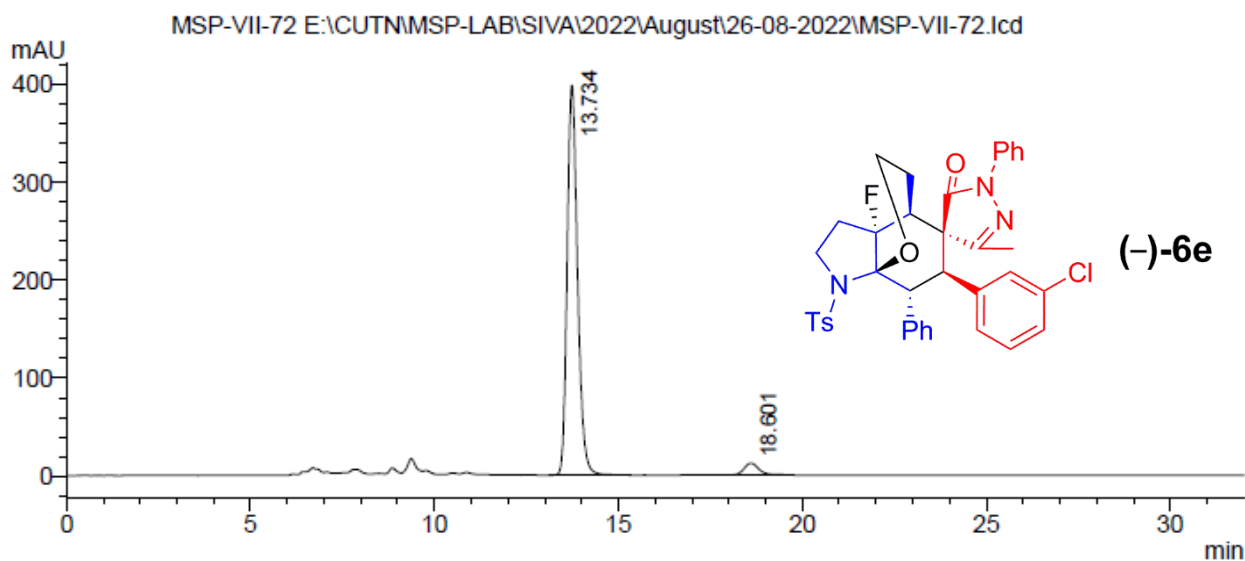

PDA Ch1 254nm

| Peak # | Ret. Time (min) | Area    | Height | Area%   |
|--------|-----------------|---------|--------|---------|
| 1      | 13.734          | 7837961 | 398662 | 95.972  |
| 2      | 18.601          | 328997  | 11943  | 4.028   |
| Total  |                 | 8166958 | 410606 | 100.000 |

HPLC Data of racemic **6f**

MSP-VII-12 E:\CUTNMSP-LAB\SIVA\2022\August\19-08-2022\MSP-VII-12.lcd

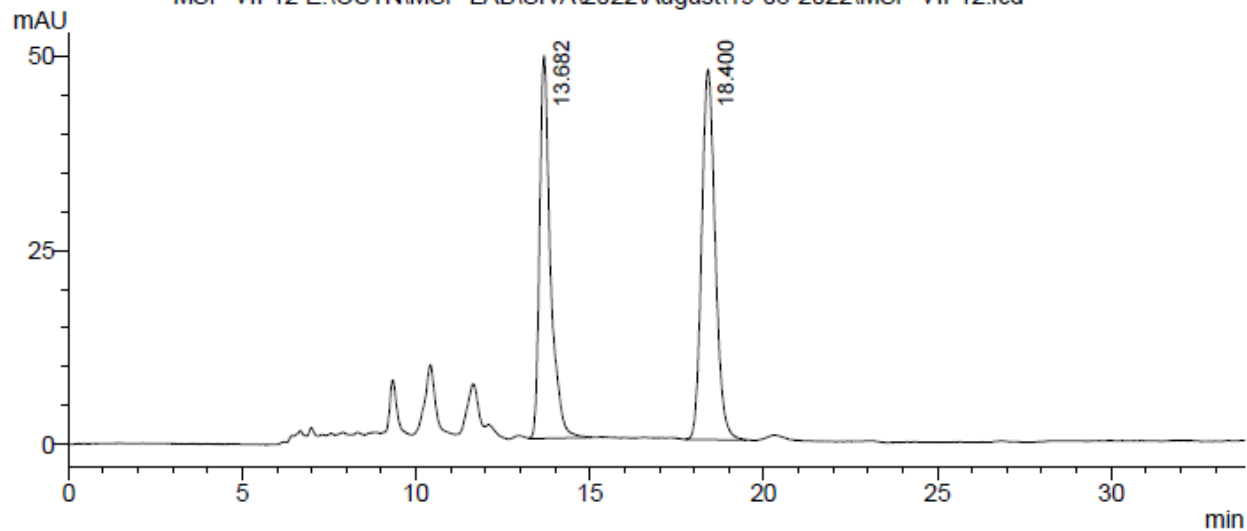

PDA Ch1 254nm

| Peak # | Ret. Time (min) | Area    | Height | Area%   |
|--------|-----------------|---------|--------|---------|
| 1      | 13.682          | 1067619 | 49254  | 45.235  |
| 2      | 18.400          | 1292540 | 47649  | 54.765  |
| Total  |                 | 2360159 | 96903  | 100.000 |

HPLC Data of chiral **6f**: 95% ee

MSP-VII-58 E:\CUTNMSP-LAB\SIVA\2022\August\19-08-2022\MSP-VII-58.lcd

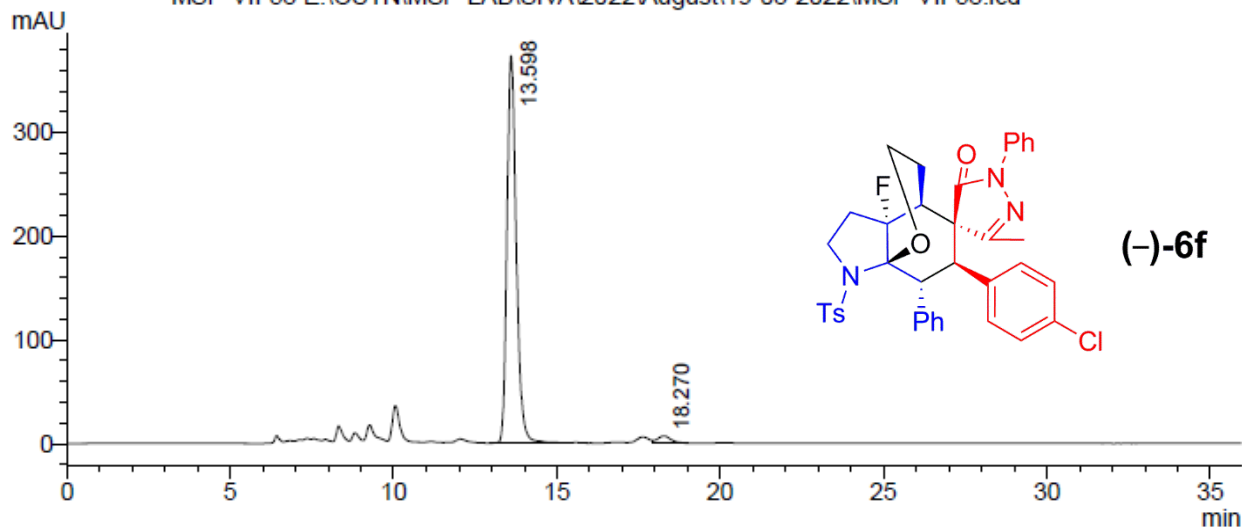

PDA Ch1 254nm

| Peak # | Ret. Time (min) | Area    | Height | Area%   |
|--------|-----------------|---------|--------|---------|
| 1      | 13.598          | 7409582 | 373258 | 97.500  |
| 2      | 18.270          | 189955  | 6822   | 2.500   |
| Total  |                 | 7599537 | 380080 | 100.000 |

HPLC Data of racemic **6g**

MSP-VII-22 E:\CUTNMSP-LAB\SIVA\2022\August26-08-2022\MSP-VII-22.lcd

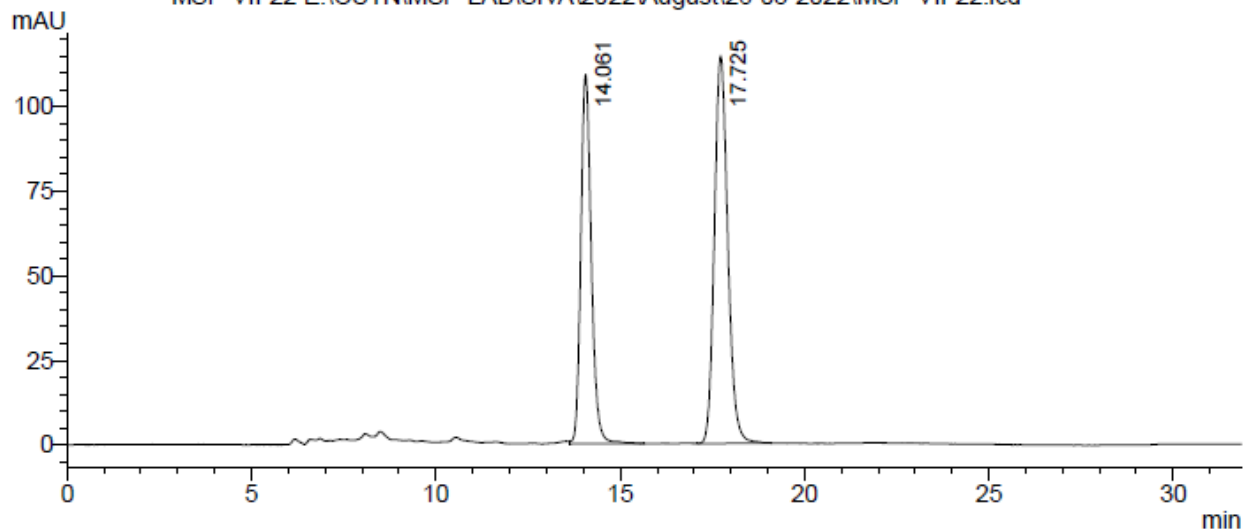

PDA Ch1 254nm

| Peak # | Ret. Time (min) | Area    | Height | Area%   |
|--------|-----------------|---------|--------|---------|
| 1      | 14.061          | 2152319 | 109125 | 42.676  |
| 2      | 17.725          | 2891099 | 114455 | 57.324  |
| Total  |                 | 5043417 | 223580 | 100.000 |

HPLC Data of chiral **6g**: 92% ee

MSP-VII-70 E:\CUTNMSP-LAB\SIVA\2022\August26-08-2022\MSP-VII-70.lcd

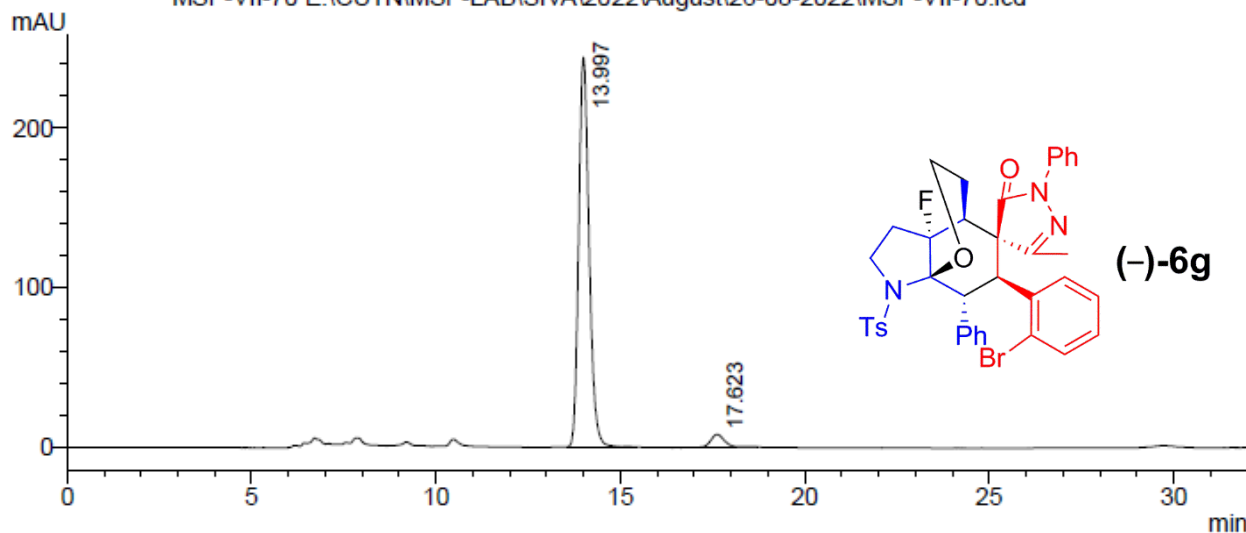

PDA Ch1 254nm

| Peak # | Ret. Time (min) | Area    | Height | Area%   |
|--------|-----------------|---------|--------|---------|
| 1      | 13.997          | 4786450 | 243927 | 95.914  |
| 2      | 17.623          | 203918  | 7956   | 4.086   |
| Total  |                 | 4990367 | 251883 | 100.000 |



### HPLC Data of racemic **6h**

MSP-VII-25 E:\CUTNMSP-LAB\SIVA\2022\August\26-08-2022\MSP-VII-25.lcd

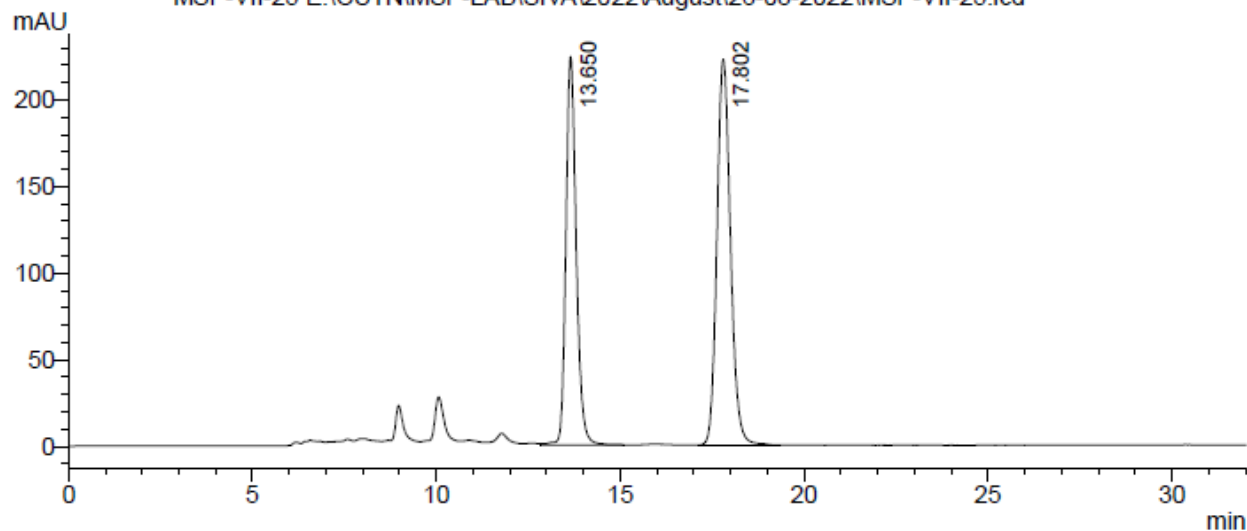

PDA Ch1 254nm

| Peak # | Ret. Time (min) | Area     | Height | Area%   |
|--------|-----------------|----------|--------|---------|
| 1      | 13.650          | 4365193  | 224149 | 43.269  |
| 2      | 17.802          | 5723398  | 222802 | 56.731  |
| Total  |                 | 10088591 | 446951 | 100.000 |

### HPLC Data of chiral **6h**: 91% ee

MSP-VII-73 E:\CUTNMSP-LAB\SIVA\2022\August\26-08-2022\MSP-VII-73.lcd

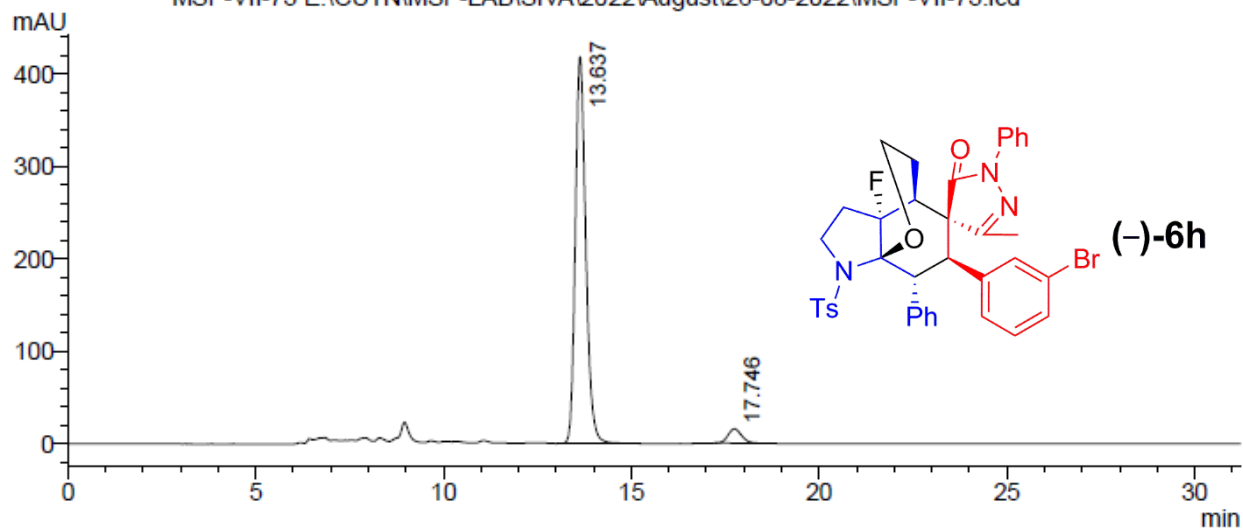

PDA Ch1 254nm

| Peak # | Ret. Time (min) | Area    | Height | Area%   |
|--------|-----------------|---------|--------|---------|
| 1      | 13.637          | 8094498 | 417965 | 95.475  |
| 2      | 17.746          | 383628  | 15376  | 4.525   |
| Total  |                 | 8478126 | 433341 | 100.000 |

HPLC Data of racemic **6i**

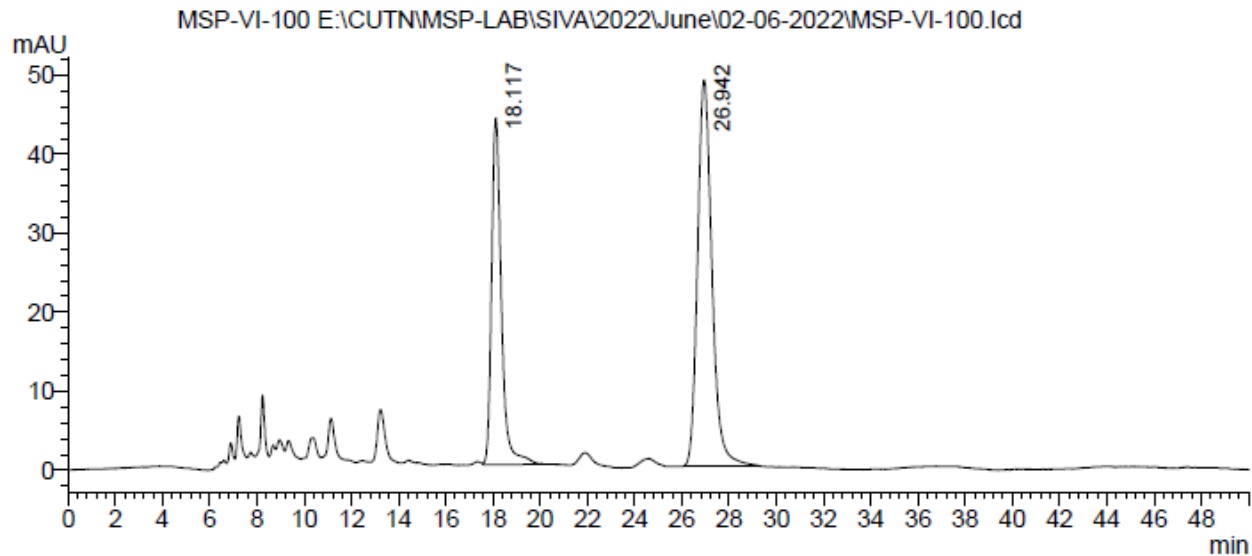

PDA Ch1 254nm

| Peak # | Ret. Time (min) | Area    | Height | Area%   |
|--------|-----------------|---------|--------|---------|
| 1      | 18.117          | 1260988 | 43872  | 37.802  |
| 2      | 26.942          | 2074770 | 48905  | 62.198  |
| Total  |                 | 3335758 | 92777  | 100.000 |

HPLC Data of chiral **6i**: 96% ee

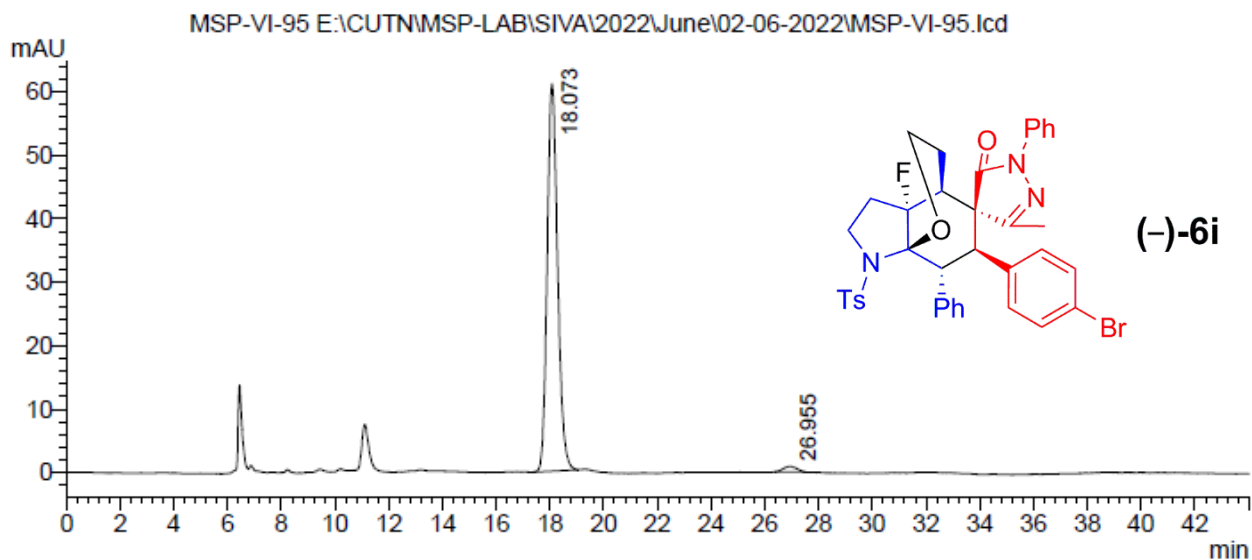

PDA Ch1 254nm

| Peak # | Ret. Time (min) | Area    | Height | Area%   |
|--------|-----------------|---------|--------|---------|
| 1      | 18.073          | 1649844 | 61036  | 98.140  |
| 2      | 26.955          | 31274   | 898    | 1.860   |
| Total  |                 | 1681118 | 61934  | 100.000 |

HPLC Data of racemic **6j**

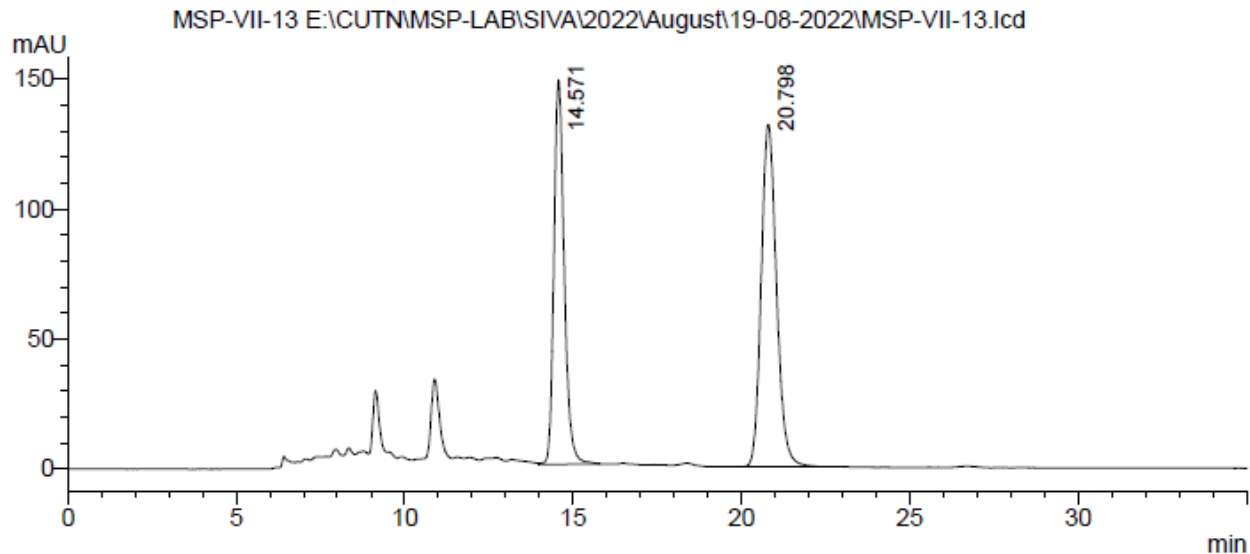

PDA Ch1 254nm

| Peak # | Ret. Time (min) | Area    | Height | Area%   |
|--------|-----------------|---------|--------|---------|
| 1      | 14.571          | 3147768 | 147992 | 43.115  |
| 2      | 20.798          | 4153152 | 131687 | 56.885  |
| Total  |                 | 7300920 | 279679 | 100.000 |

HPLC Data of chiral **6j**: 95% *ee*

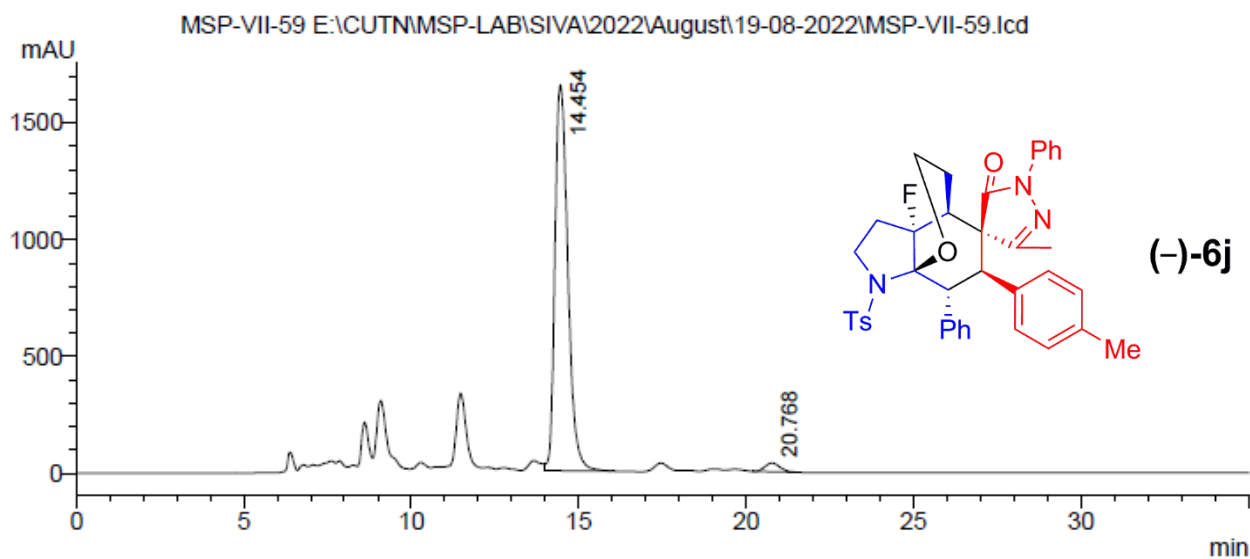

PDA Ch1 254nm

| Peak # | Ret. Time (min) | Area     | Height  | Area%   |
|--------|-----------------|----------|---------|---------|
| 1      | 14.454          | 44422887 | 1653102 | 97.466  |
| 2      | 20.768          | 1154973  | 37238   | 2.534   |
| Total  |                 | 45577860 | 1690340 | 100.000 |

HPLC Data of racemic **6k**

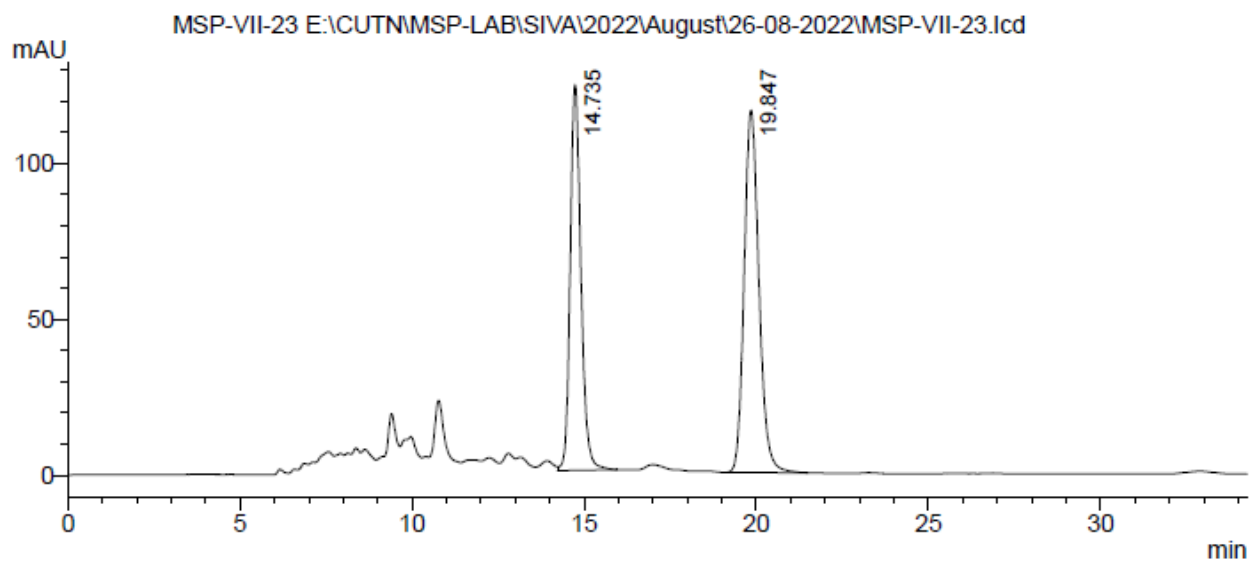

PDA Ch1 254nm

| Peak # | Ret. Time (min) | Area    | Height | Area%   |
|--------|-----------------|---------|--------|---------|
| 1      | 14.735          | 2675826 | 123594 | 43.535  |
| 2      | 19.847          | 3470545 | 116126 | 56.465  |
| Total  |                 | 6146371 | 239720 | 100.000 |

HPLC Data of chiral **6k**: 93% ee

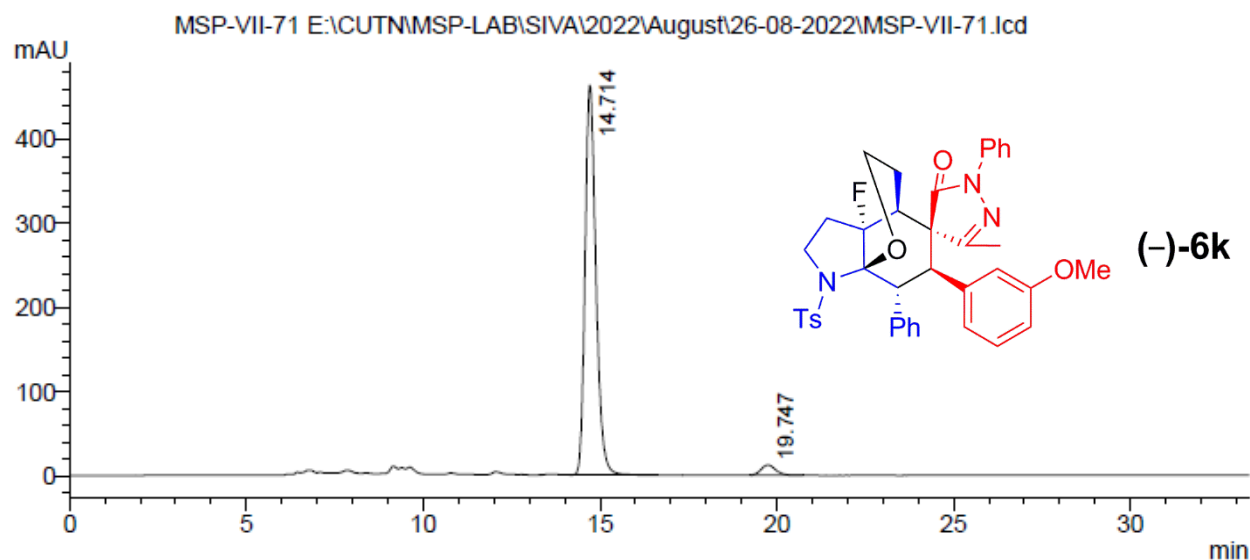

PDA Ch1 254nm

| Peak # | Ret. Time (min) | Area     | Height | Area%   |
|--------|-----------------|----------|--------|---------|
| 1      | 14.714          | 9900343  | 463575 | 96.567  |
| 2      | 19.747          | 351963   | 12173  | 3.433   |
| Total  |                 | 10252306 | 475748 | 100.000 |

HPLC Data of racemic **6I**

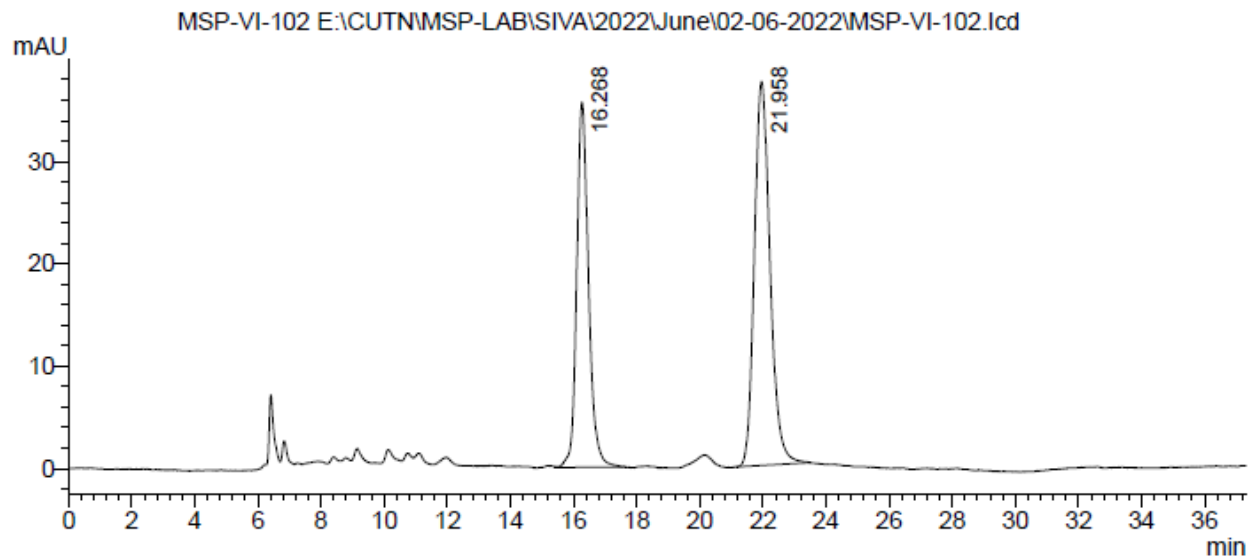

PDA Ch1 254nm

| Peak # | Ret. Time (min) | Area    | Height | Area%   |
|--------|-----------------|---------|--------|---------|
| 1      | 16.268          | 931220  | 35705  | 41.769  |
| 2      | 21.958          | 1298232 | 37521  | 58.231  |
| Total  |                 | 2229453 | 73226  | 100.000 |

HPLC Data of chiral **6I**: 97% ee

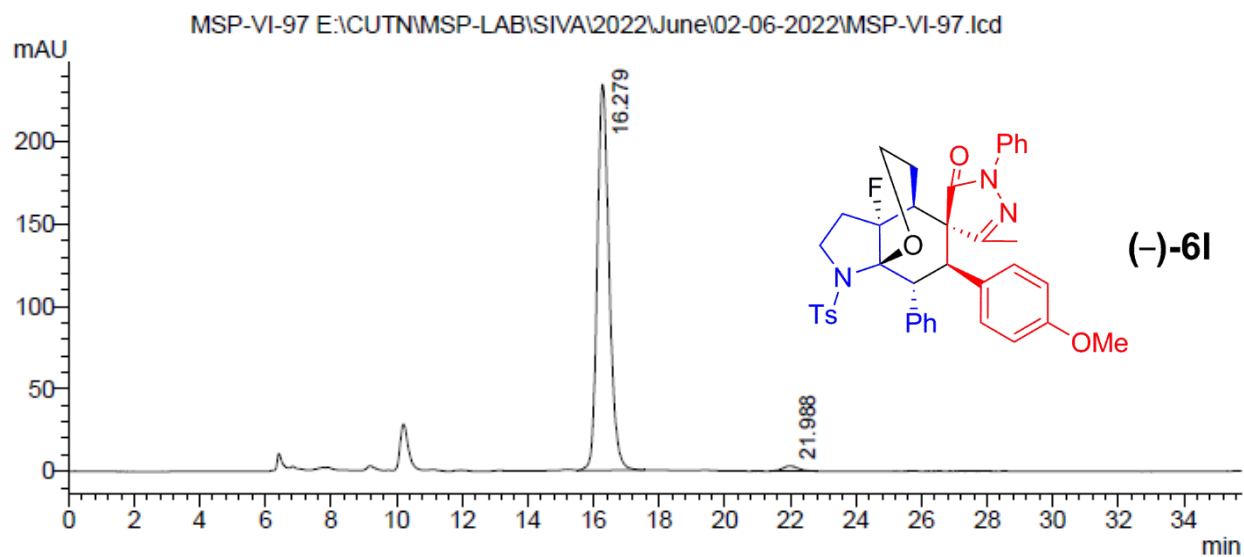

PDA Ch1 254nm

| Peak # | Ret. Time (min) | Area    | Height | Area%   |
|--------|-----------------|---------|--------|---------|
| 1      | 16.279          | 5902959 | 234154 | 98.290  |
| 2      | 21.988          | 102719  | 3095   | 1.710   |
| Total  |                 | 6005678 | 237249 | 100.000 |

### HPLC Data of racemic **6m**

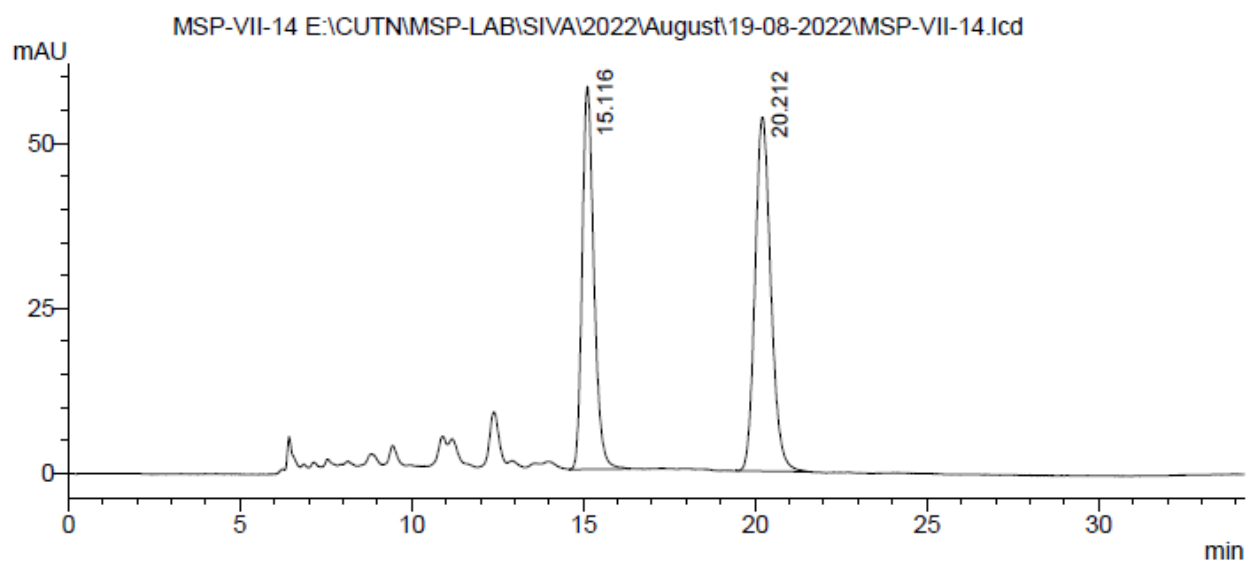

PDA Ch1 254nm

| Peak # | Ret. Time (min) | Area    | Height | Area%   |
|--------|-----------------|---------|--------|---------|
| 1      | 15.116          | 1374983 | 57966  | 44.497  |
| 2      | 20.212          | 1715075 | 53660  | 55.503  |
| Total  |                 | 3090059 | 111625 | 100.000 |

### HPLC Data of chiral **6m**: 92% *ee*

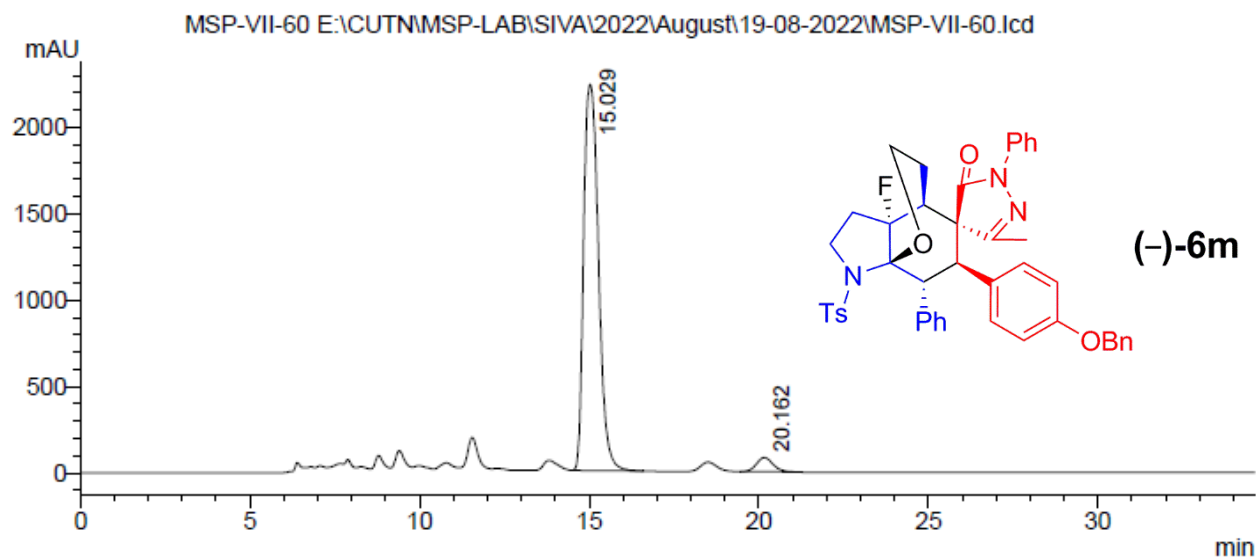

PDA Ch1 254nm

| Peak # | Ret. Time (min) | Area     | Height  | Area%   |
|--------|-----------------|----------|---------|---------|
| 1      | 15.029          | 67909354 | 2237007 | 96.059  |
| 2      | 20.162          | 2786085  | 82106   | 3.941   |
| Total  |                 | 70695438 | 2319113 | 100.000 |

### HPLC Data of racemic **6n**

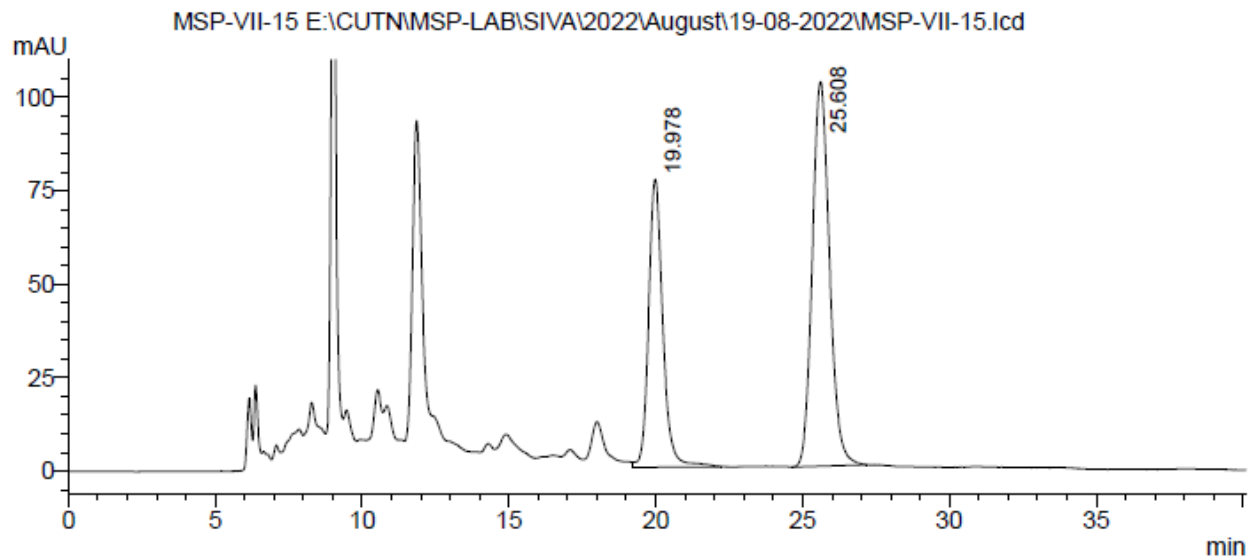

PDA Ch1 254nm

| Peak # | Ret. Time (min) | Area    | Height | Area%   |
|--------|-----------------|---------|--------|---------|
| 1      | 19.978          | 2595851 | 77005  | 38.221  |
| 2      | 25.608          | 4195749 | 102830 | 61.779  |
| Total  |                 | 6791600 | 179835 | 100.000 |

### HPLC Data of chiral **6n**: 95% *ee*

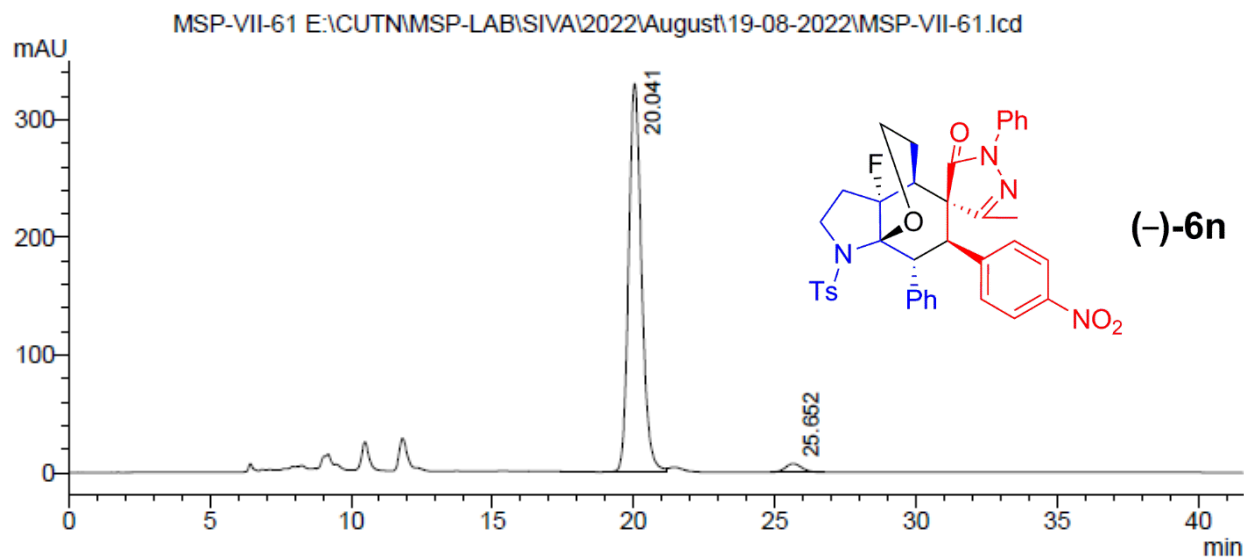

PDA Ch1 254nm

| Peak # | Ret. Time (min) | Area     | Height | Area%   |
|--------|-----------------|----------|--------|---------|
| 1      | 20.041          | 10467600 | 330021 | 97.253  |
| 2      | 25.652          | 295672   | 7300   | 2.747   |
| Total  |                 | 10763272 | 337320 | 100.000 |

HPLC Data of racemic **6o**

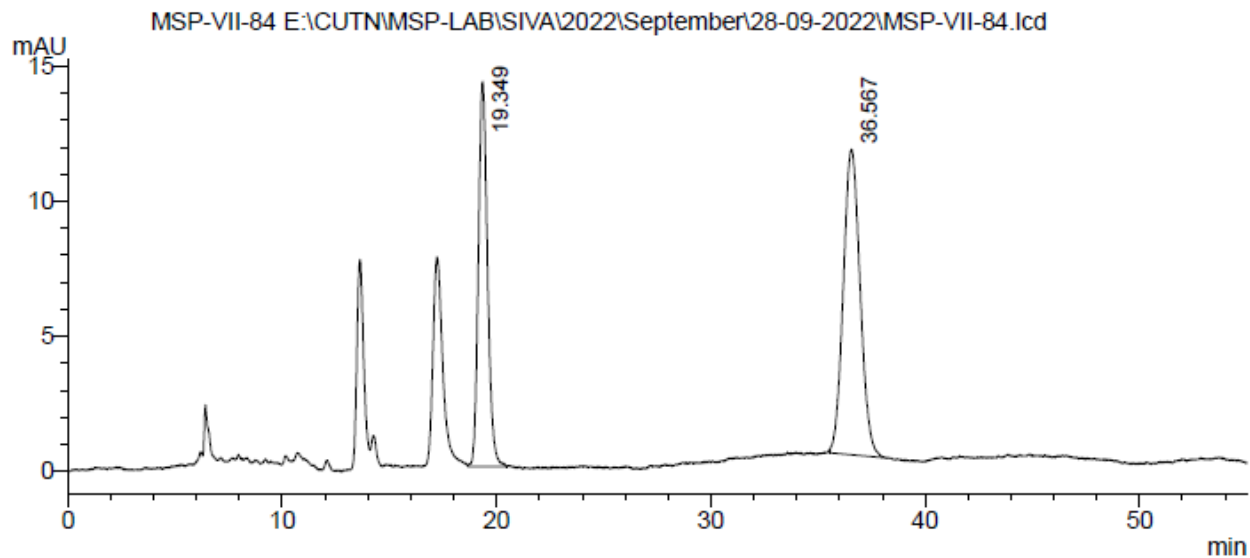

PDA Ch1 254nm

| Peak # | Ret. Time (min) | Area    | Height | Area%   |
|--------|-----------------|---------|--------|---------|
| 1      | 19.349          | 421656  | 14261  | 40.576  |
| 2      | 36.567          | 617511  | 11321  | 59.424  |
| Total  |                 | 1039167 | 25583  | 100.000 |

HPLC Data of chiral **6o**: 64% ee

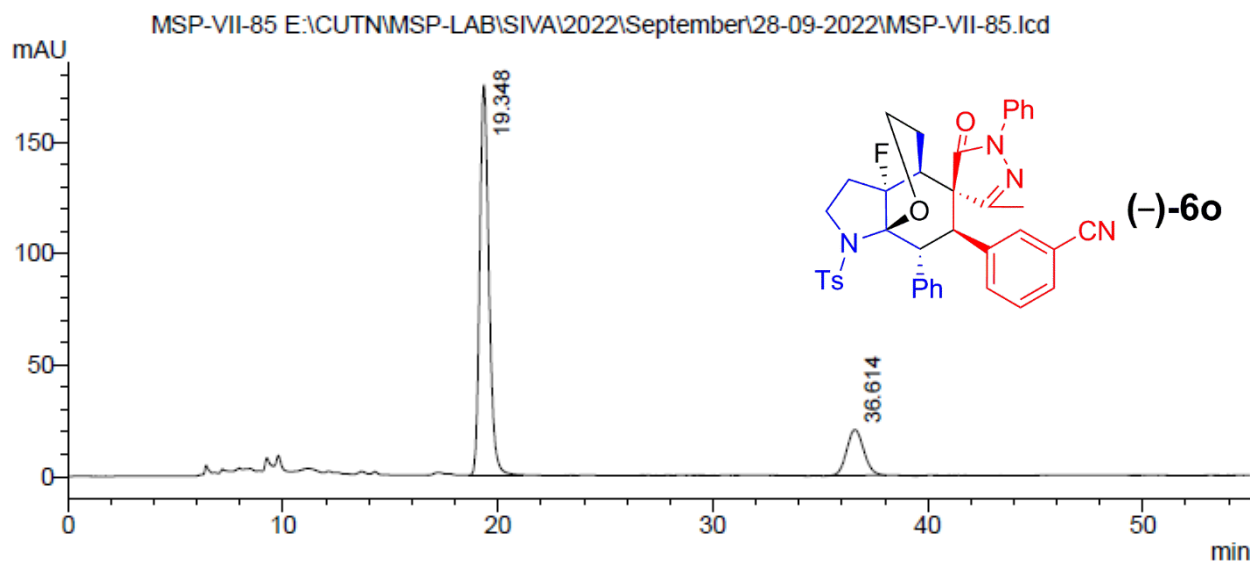

PDA Ch1 254nm

| Peak # | Ret. Time (min) | Area    | Height | Area%   |
|--------|-----------------|---------|--------|---------|
| 1      | 19.348          | 5183599 | 174825 | 82.047  |
| 2      | 36.614          | 1134247 | 20548  | 17.953  |
| Total  |                 | 6317846 | 195374 | 100.000 |



HPLC Data of racemic **6p**

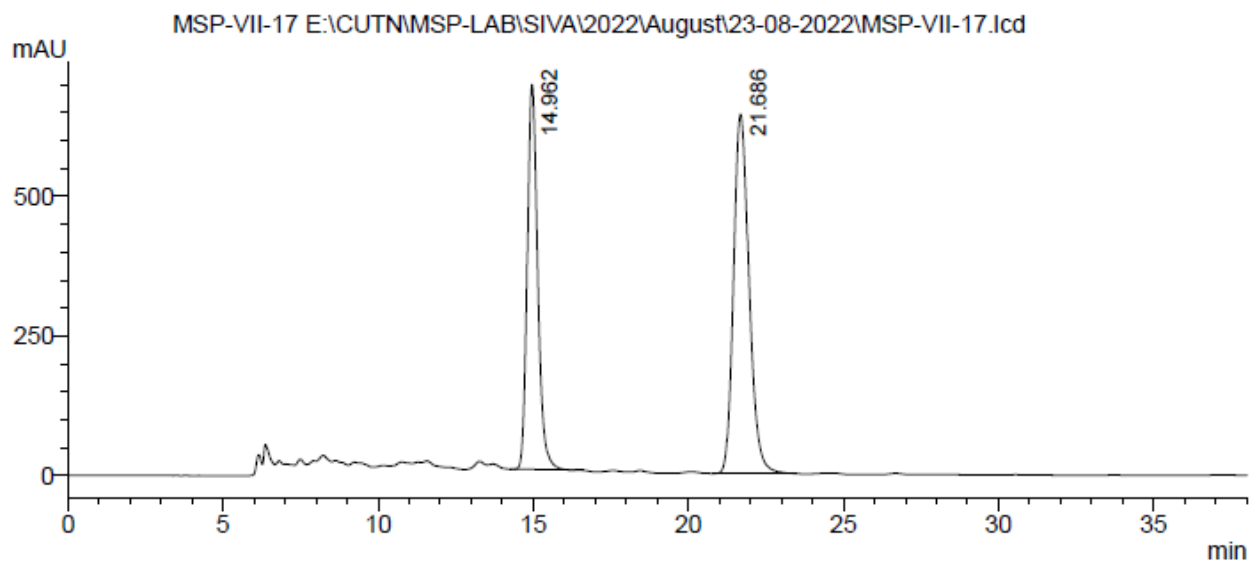

PDA Ch1 254nm

| Peak # | Ret. Time (min) | Area     | Height  | Area%   |
|--------|-----------------|----------|---------|---------|
| 1      | 14.962          | 16148090 | 688914  | 41.799  |
| 2      | 21.686          | 22485067 | 643178  | 58.201  |
| Total  |                 | 38633157 | 1332093 | 100.000 |

HPLC Data of chiral **6p**: 92% ee

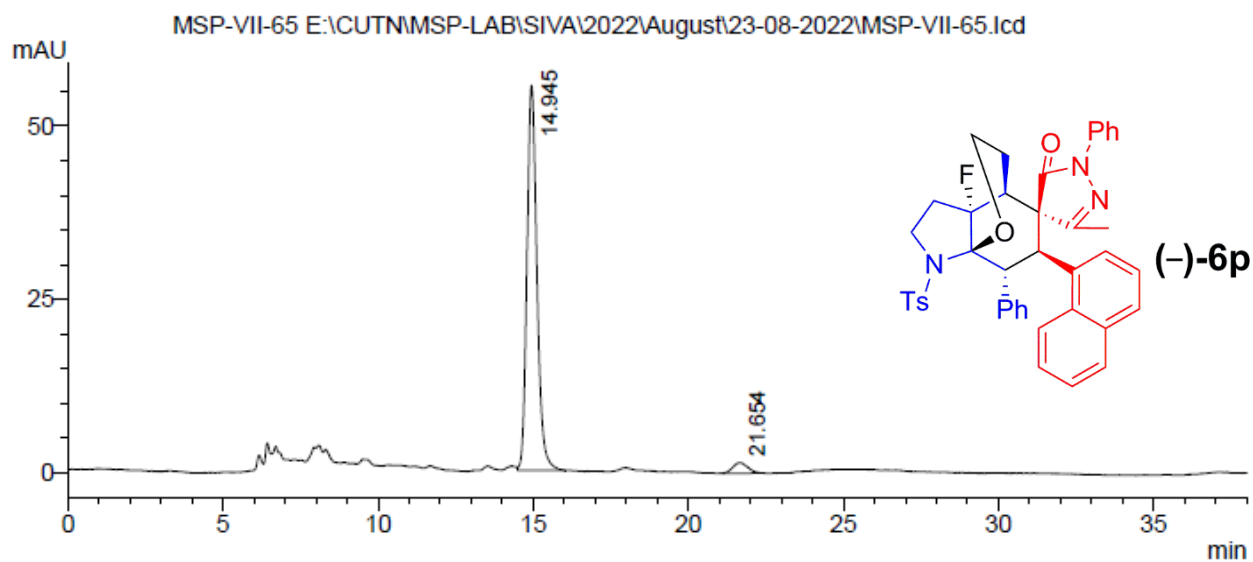

PDA Ch1 254nm

| Peak # | Ret. Time (min) | Area    | Height | Area%   |
|--------|-----------------|---------|--------|---------|
| 1      | 14.945          | 1234565 | 55380  | 96.083  |
| 2      | 21.654          | 50324   | 1518   | 3.917   |
| Total  |                 | 1284889 | 56898  | 100.000 |

### HPLC Data of racemic **6q**

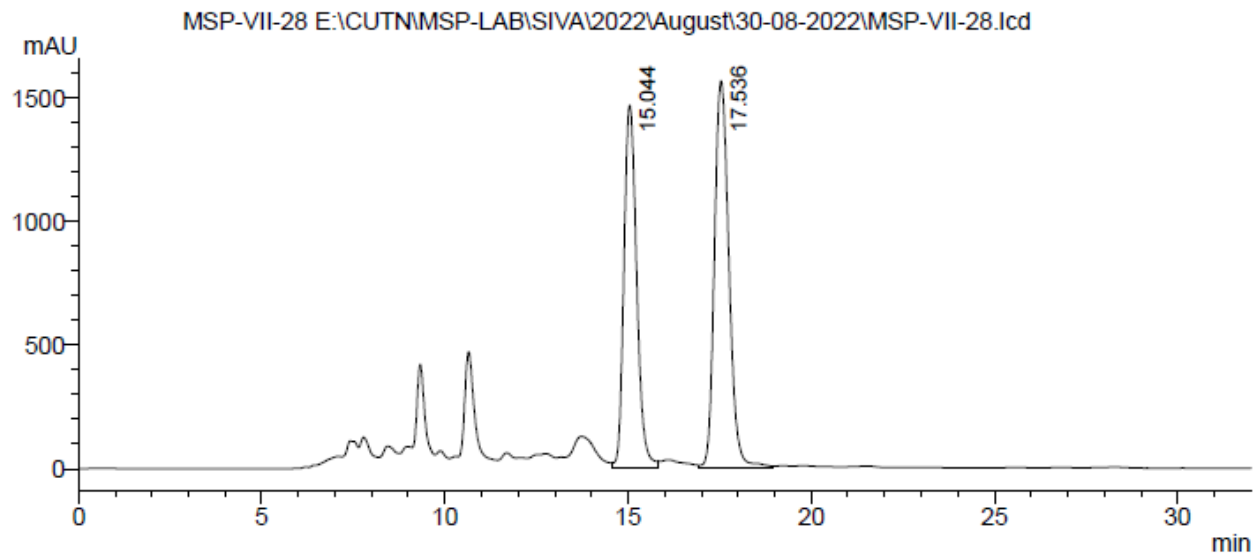

PDA Ch1 254nm

| Peak # | Ret. Time (min) | Area     | Height  | Area%   |
|--------|-----------------|----------|---------|---------|
| 1      | 15.044          | 35640103 | 1469383 | 45.175  |
| 2      | 17.536          | 43252962 | 1566401 | 54.825  |
| Total  |                 | 78893065 | 3035783 | 100.000 |

### HPLC Data of chiral **6q**: 95% *ee*

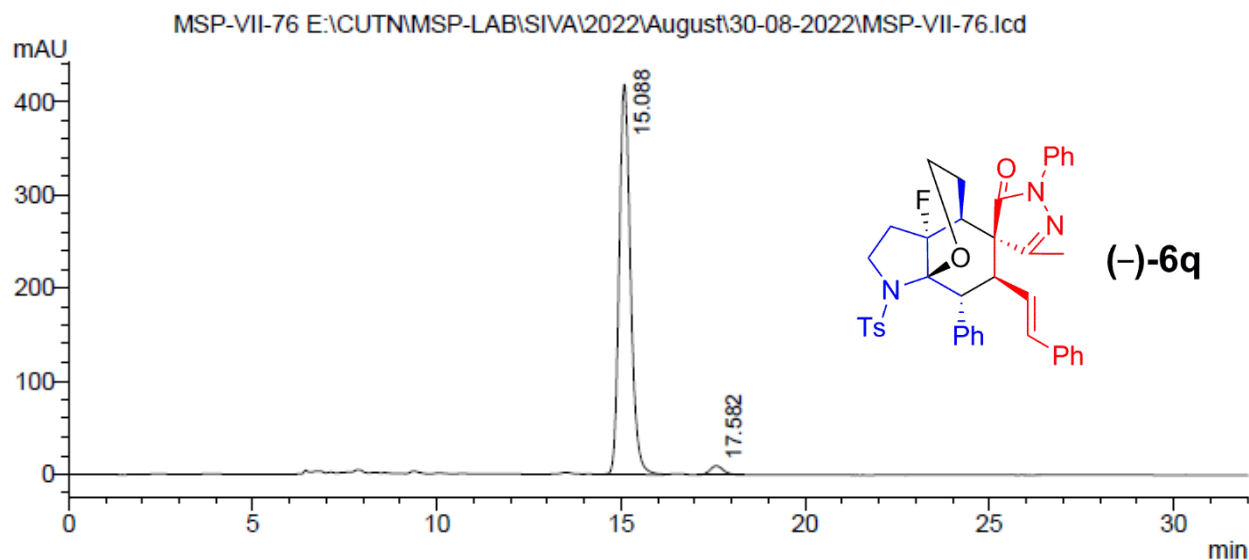

PDA Ch1 254nm

| Peak # | Ret. Time (min) | Area    | Height | Area%   |
|--------|-----------------|---------|--------|---------|
| 1      | 15.088          | 8948794 | 418573 | 97.432  |
| 2      | 17.582          | 235851  | 9601   | 2.568   |
| Total  |                 | 9184644 | 428174 | 100.000 |

### HPLC Data of racemic **6r**

MSP-VII-16 E:\CUTNMSP-LAB\SIVA\2022\August\23-08-2022\MSP-VII-16.lcd

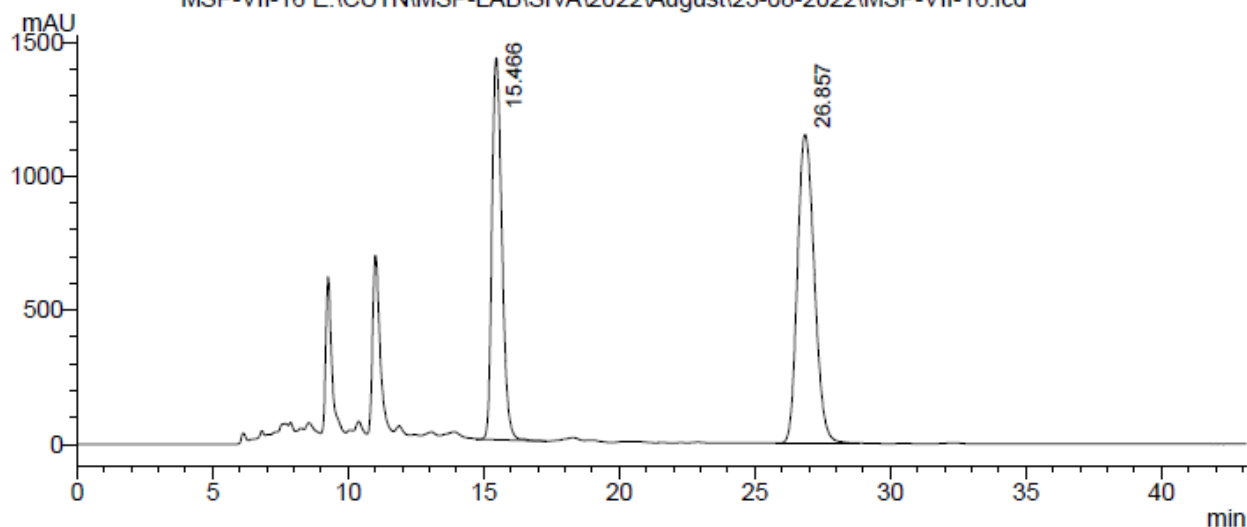

PDA Ch1 254nm

| Peak # | Ret. Time (min) | Area     | Height  | Area%   |
|--------|-----------------|----------|---------|---------|
| 1      | 15.466          | 36237747 | 1423766 | 42.145  |
| 2      | 26.857          | 49746312 | 1150331 | 57.855  |
| Total  |                 | 85984059 | 2574096 | 100.000 |

### HPLC Data of chiral **6r**: 95% ee

MSP-VII-64 E:\CUTNMSP-LAB\SIVA\2022\August\23-08-2022\MSP-VII-64.lcd

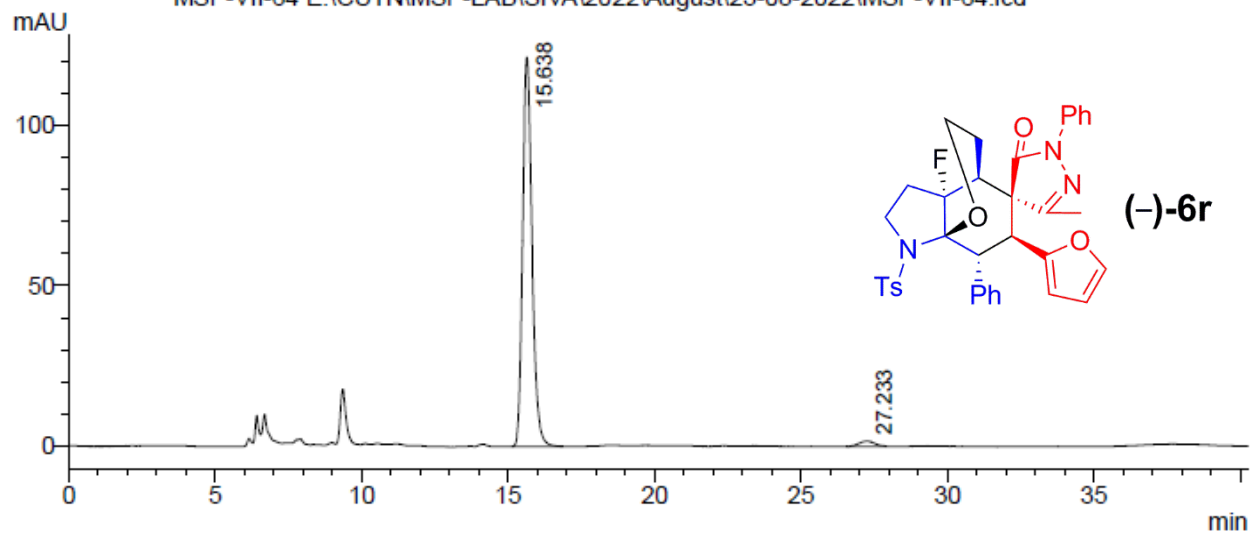

PDA Ch1 254nm

| Peak # | Ret. Time (min) | Area    | Height | Area%   |
|--------|-----------------|---------|--------|---------|
| 1      | 15.638          | 2718185 | 121490 | 97.722  |
| 2      | 27.233          | 63367   | 1662   | 2.278   |
| Total  |                 | 2781553 | 123151 | 100.000 |

### HPLC Data of racemic **6s**

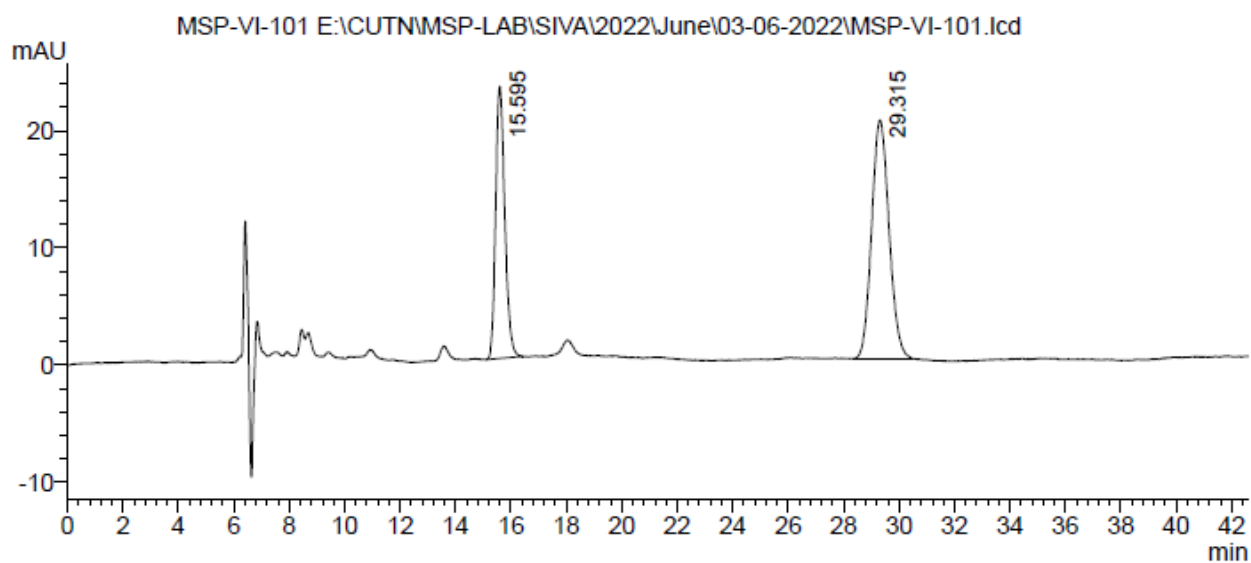

PDA Ch1 254nm

| Peak # | Ret. Time (min) | Area    | Height | Area%   |
|--------|-----------------|---------|--------|---------|
| 1      | 15.595          | 533437  | 23249  | 37.461  |
| 2      | 29.315          | 890558  | 20365  | 62.539  |
| Total  |                 | 1423995 | 43613  | 100.000 |

### HPLC Data of chiral **6s**: 97% ee

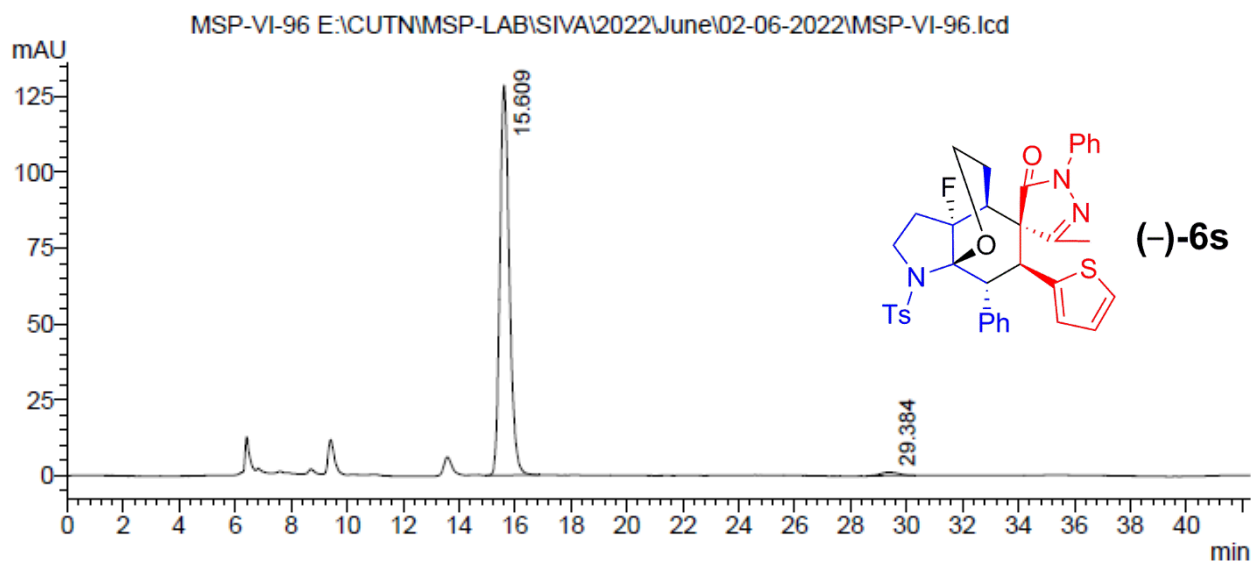

PDA Ch1 254nm

| Peak # | Ret. Time (min) | Area    | Height | Area%   |
|--------|-----------------|---------|--------|---------|
| 1      | 15.609          | 3027892 | 128549 | 98.345  |
| 2      | 29.384          | 50941   | 1183   | 1.655   |
| Total  |                 | 3078833 | 129732 | 100.000 |

HPLC Data of racemic **6t**

MSP-VII-20 E:\CUTNMSP-LAB\SIVA\2022\August\23-08-2022\MSP-VII-20.lcd

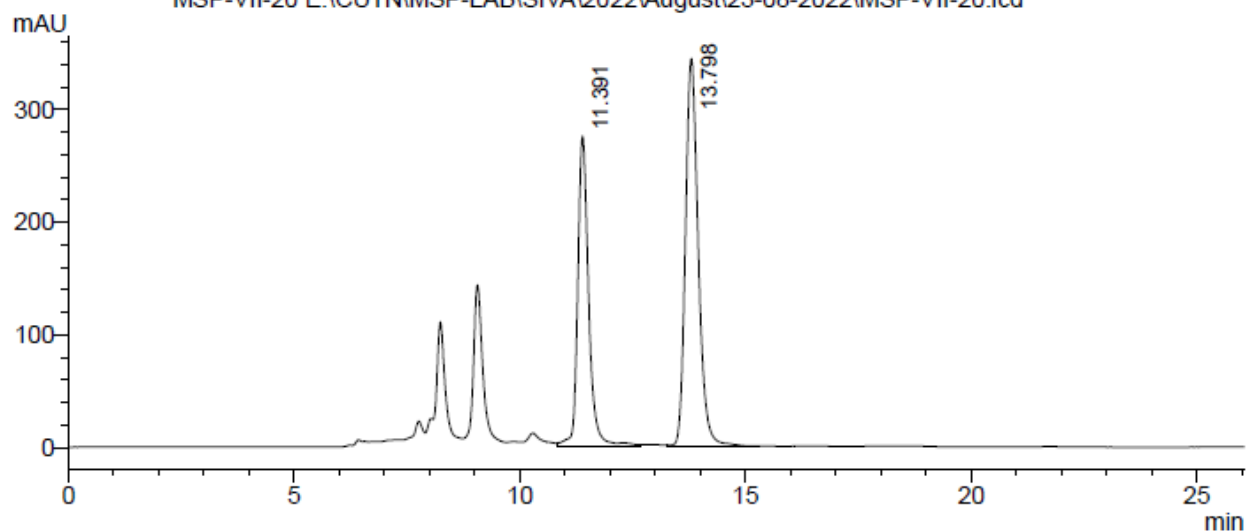

PDA Ch1 254nm

| Peak # | Ret. Time (min) | Area     | Height | Area%   |
|--------|-----------------|----------|--------|---------|
| 1      | 11.391          | 4647506  | 275644 | 40.568  |
| 2      | 13.798          | 6808547  | 344330 | 59.432  |
| Total  |                 | 11456053 | 619974 | 100.000 |

HPLC Data of chiral **6t**: 93% ee

MSP-VII-68 E:\CUTNMSP-LAB\SIVA\2022\August\23-08-2022\MSP-VII-68.lcd

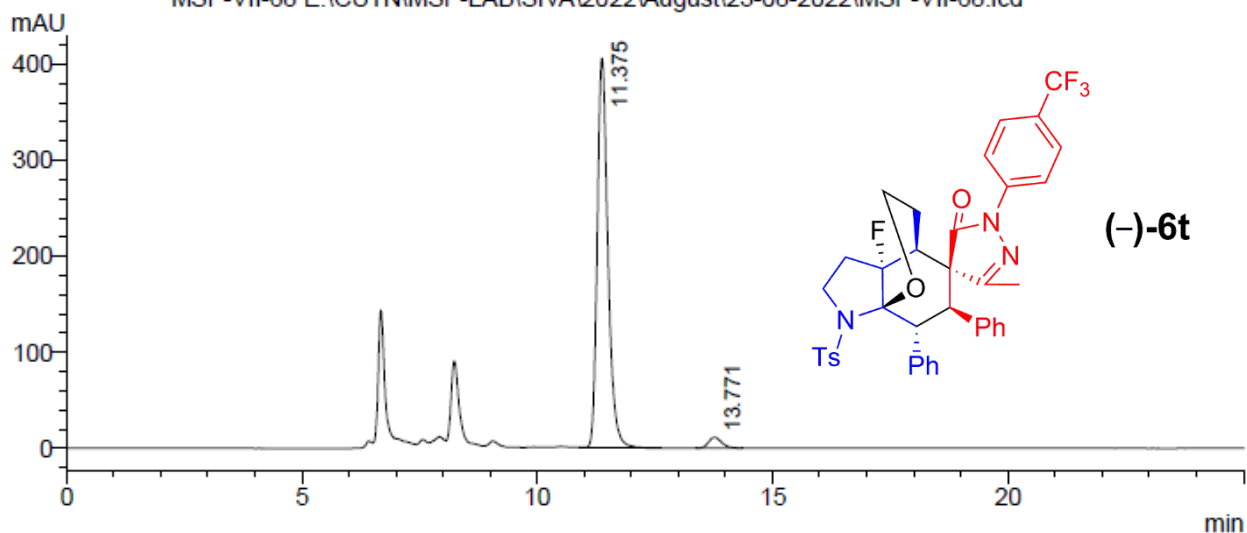

PDA Ch1 254nm

| Peak # | Ret. Time (min) | Area    | Height | Area%   |
|--------|-----------------|---------|--------|---------|
| 1      | 11.375          | 6434845 | 406294 | 96.650  |
| 2      | 13.771          | 223023  | 11431  | 3.350   |
| Total  |                 | 6657868 | 417725 | 100.000 |

### HPLC Data of racemic **6u**

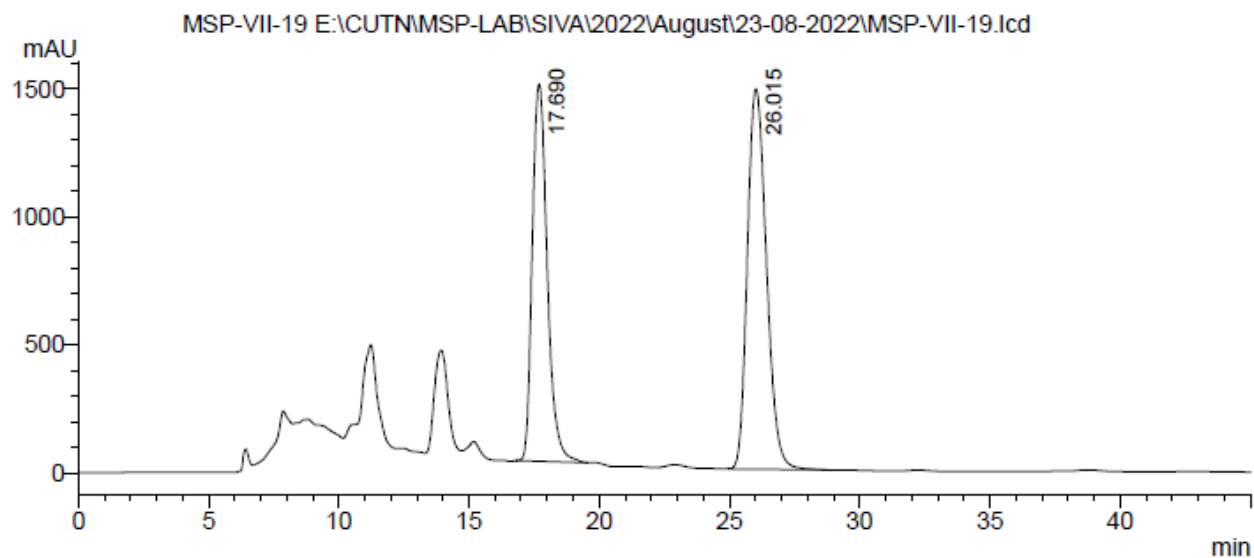

PDA Ch1 254nm

| Peak # | Ret. Time (min) | Area      | Height  | Area%   |
|--------|-----------------|-----------|---------|---------|
| 1      | 17.690          | 58792922  | 1474131 | 43.723  |
| 2      | 26.015          | 75675059  | 1485905 | 56.277  |
| Total  |                 | 134467981 | 2960036 | 100.000 |

### HPLC Data of chiral **6u**: 85% ee

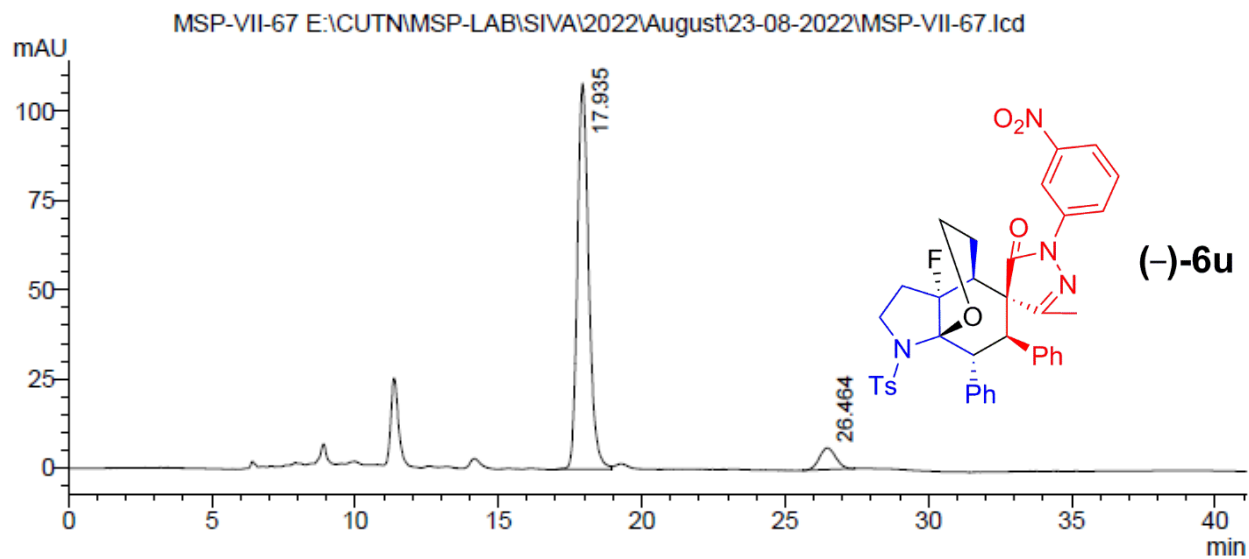

PDA Ch1 254nm

| Peak # | Ret. Time (min) | Area    | Height | Area%   |
|--------|-----------------|---------|--------|---------|
| 1      | 17.935          | 2980068 | 108141 | 92.525  |
| 2      | 26.464          | 240743  | 6065   | 7.475   |
| Total  |                 | 3220811 | 114206 | 100.000 |

HPLC Data of racemic **6v**

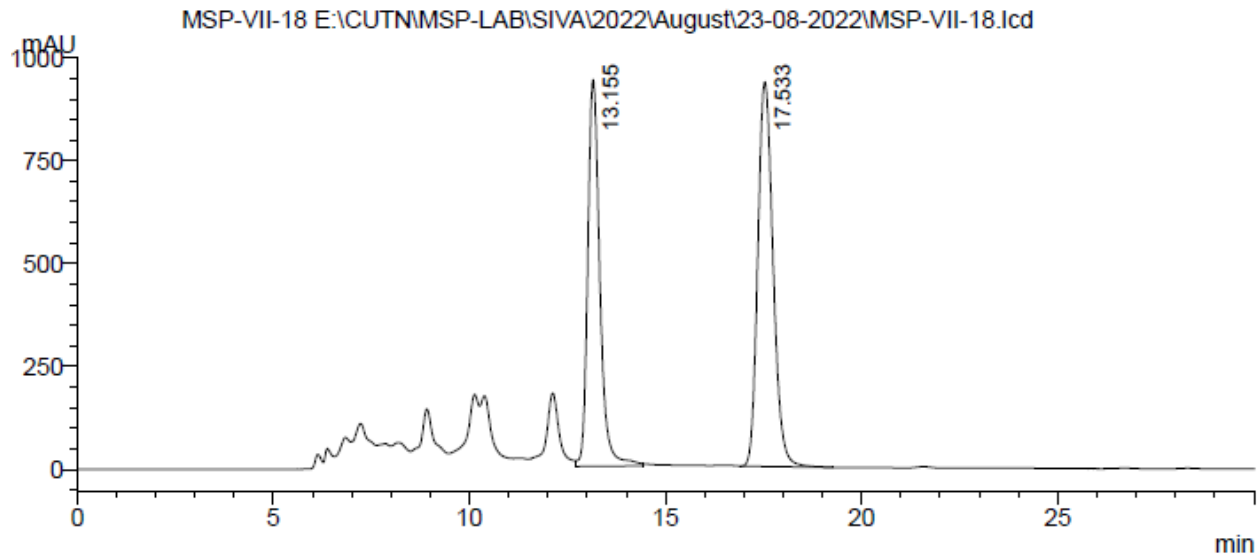

PDA Ch1 254nm

| Peak # | Ret. Time (min) | Area     | Height  | Area%   |
|--------|-----------------|----------|---------|---------|
| 1      | 13.155          | 20109745 | 939778  | 44.240  |
| 2      | 17.533          | 25345929 | 934811  | 55.760  |
| Total  |                 | 45455675 | 1874589 | 100.000 |

HPLC Data of chiral **6v**: 93% *ee*

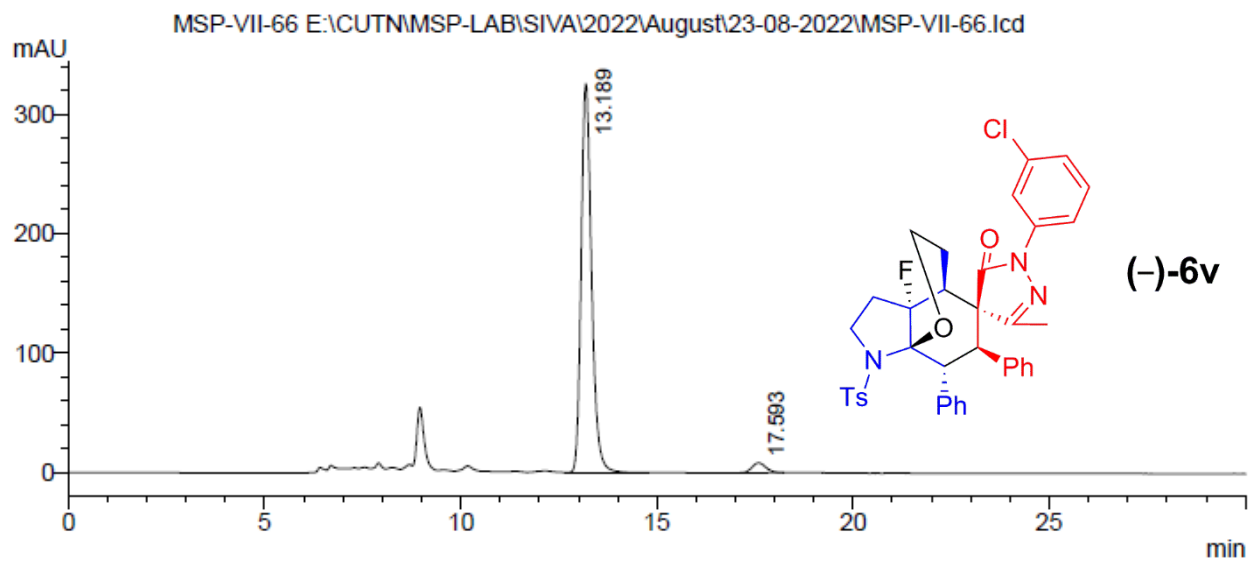

PDA Ch1 254nm

| Peak # | Ret. Time (min) | Area    | Height | Area%   |
|--------|-----------------|---------|--------|---------|
| 1      | 13.189          | 6048164 | 325440 | 96.728  |
| 2      | 17.593          | 204567  | 8281   | 3.272   |
| Total  |                 | 6252731 | 333721 | 100.000 |

HPLC Data of racemic **6w**

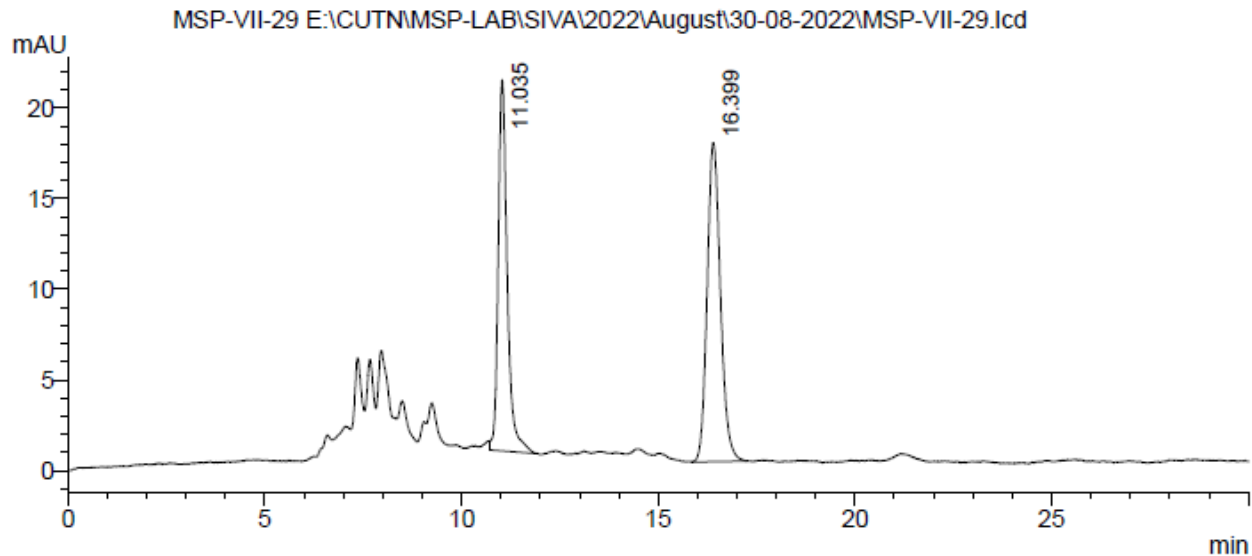

PDA Ch1 254nm

| Peak # | Ret. Time (min) | Area   | Height | Area%   |
|--------|-----------------|--------|--------|---------|
| 1      | 11.035          | 325635 | 20466  | 44.040  |
| 2      | 16.399          | 413779 | 17606  | 55.960  |
| Total  |                 | 739414 | 38072  | 100.000 |

HPLC Data of chiral **6w**: 90% *ee*

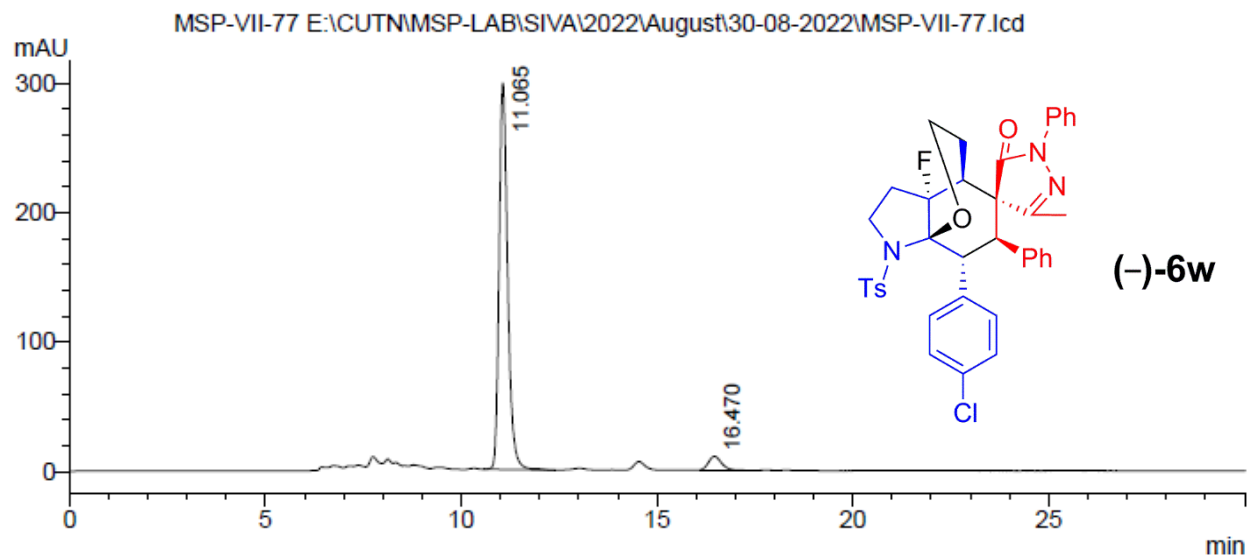

PDA Ch1 254nm

| Peak # | Ret. Time (min) | Area    | Height | Area%   |
|--------|-----------------|---------|--------|---------|
| 1      | 11.065          | 4570720 | 298676 | 94.932  |
| 2      | 16.470          | 244027  | 10656  | 5.068   |
| Total  |                 | 4814747 | 309333 | 100.000 |



### HPLC Data of racemic **6x**

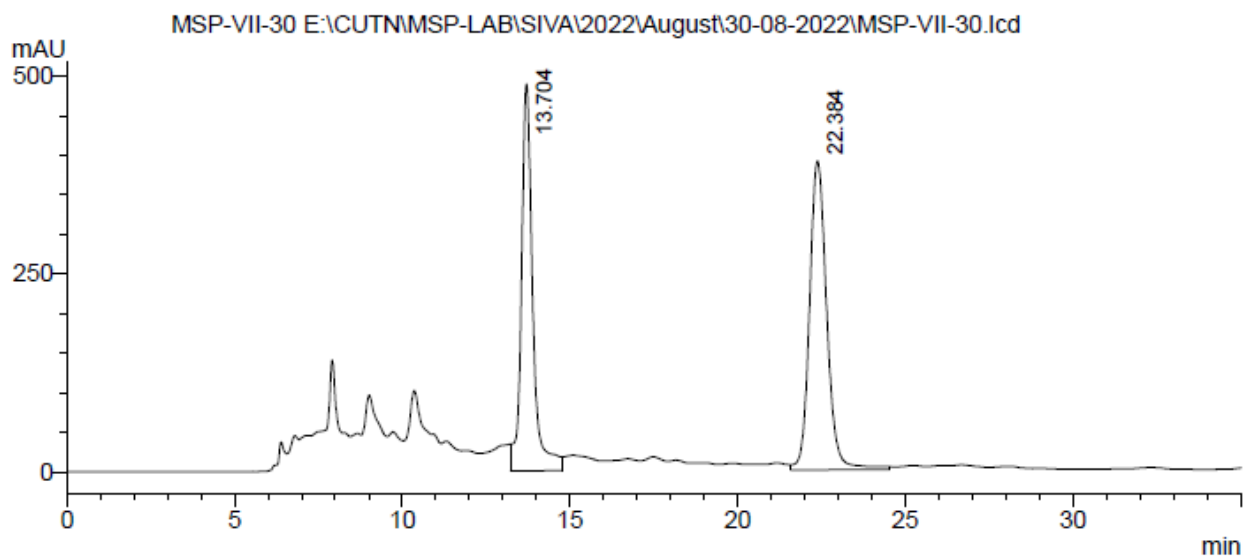

PDA Ch1 254nm

| Peak # | Ret. Time (min) | Area     | Height | Area%   |
|--------|-----------------|----------|--------|---------|
| 1      | 13.704          | 11400979 | 488672 | 44.948  |
| 2      | 22.384          | 13963906 | 390449 | 55.052  |
| Total  |                 | 25364885 | 879121 | 100.000 |

### HPLC Data of chiral **6x**: 92% *ee*

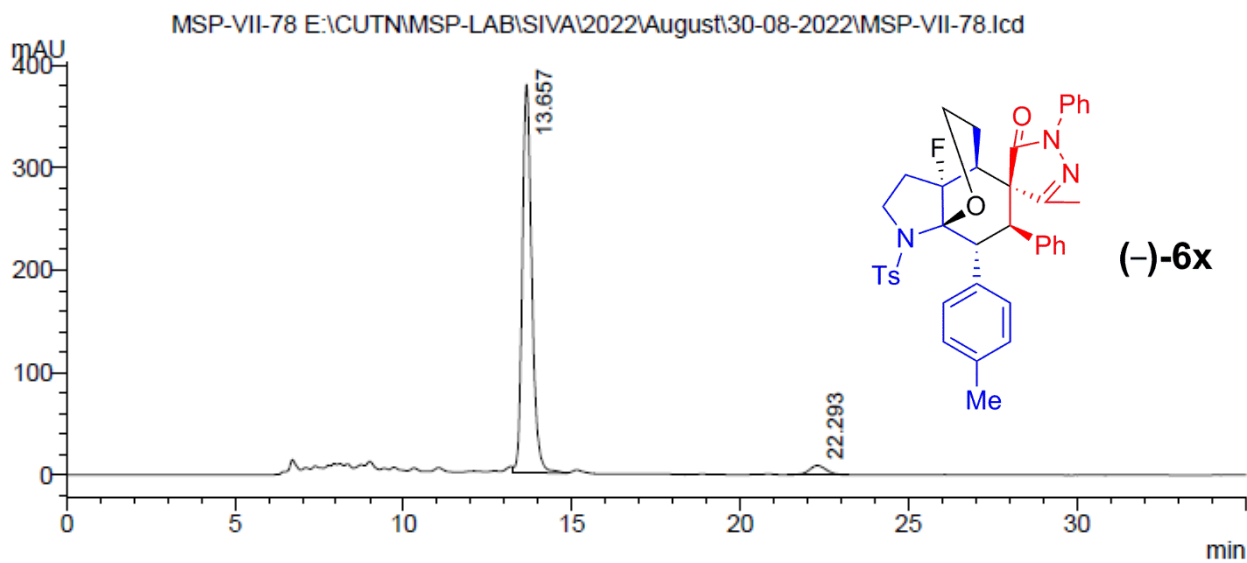

PDA Ch1 254nm

| Peak # | Ret. Time (min) | Area    | Height | Area%   |
|--------|-----------------|---------|--------|---------|
| 1      | 13.657          | 7422174 | 379191 | 95.912  |
| 2      | 22.293          | 316322  | 9018   | 4.088   |
| Total  |                 | 7738496 | 388209 | 100.000 |

### HPLC Data of racemic **6y**

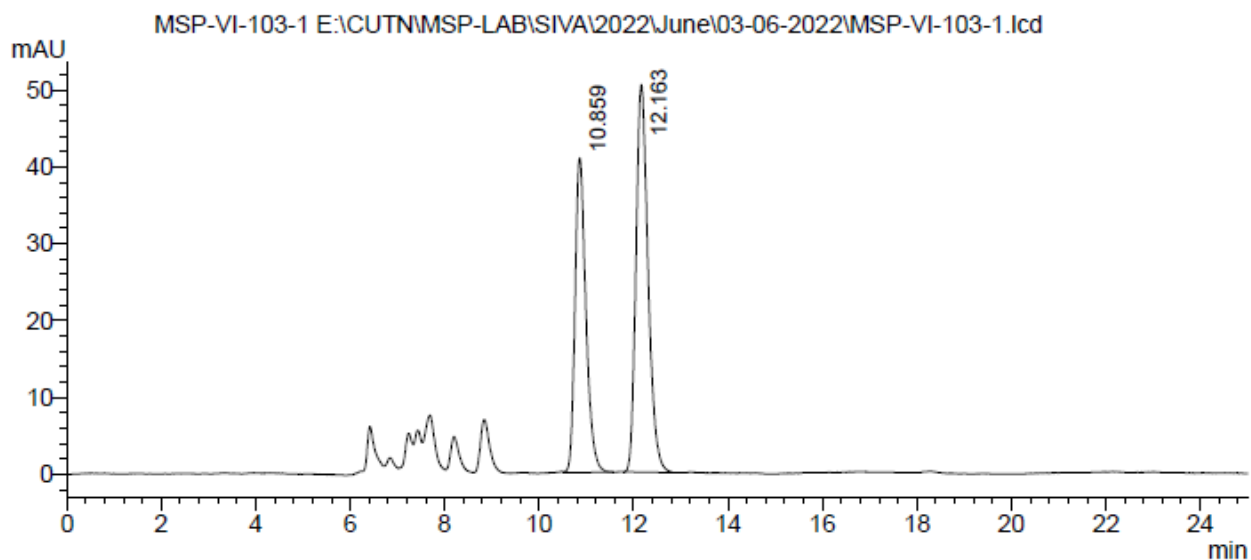

PDA Ch1 254nm

| Peak # | Ret. Time (min) | Area    | Height | Area%   |
|--------|-----------------|---------|--------|---------|
| 1      | 10.859          | 654902  | 40928  | 42.099  |
| 2      | 12.163          | 900709  | 50429  | 57.901  |
| Total  |                 | 1555611 | 91357  | 100.000 |

### HPLC Data of chiral **6y**: 96% ee

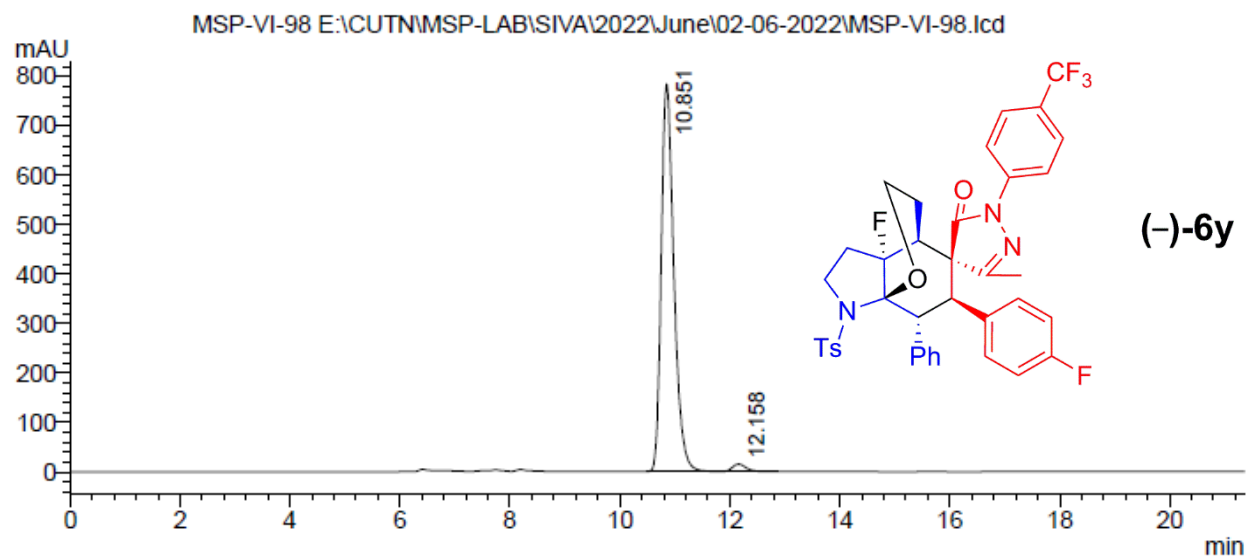

PDA Ch1 254nm

| Peak # | Ret. Time (min) | Area     | Height | Area%   |
|--------|-----------------|----------|--------|---------|
| 1      | 10.851          | 12541658 | 783907 | 97.843  |
| 2      | 12.158          | 276504   | 15380  | 2.157   |
| Total  |                 | 12818162 | 799288 | 100.000 |

### HPLC Data of racemic 6'a

MSP-VII-121-2 E:\CUTN\MSP-LAB\SIVA\2022\November\MSP-VII-121-2.lcd

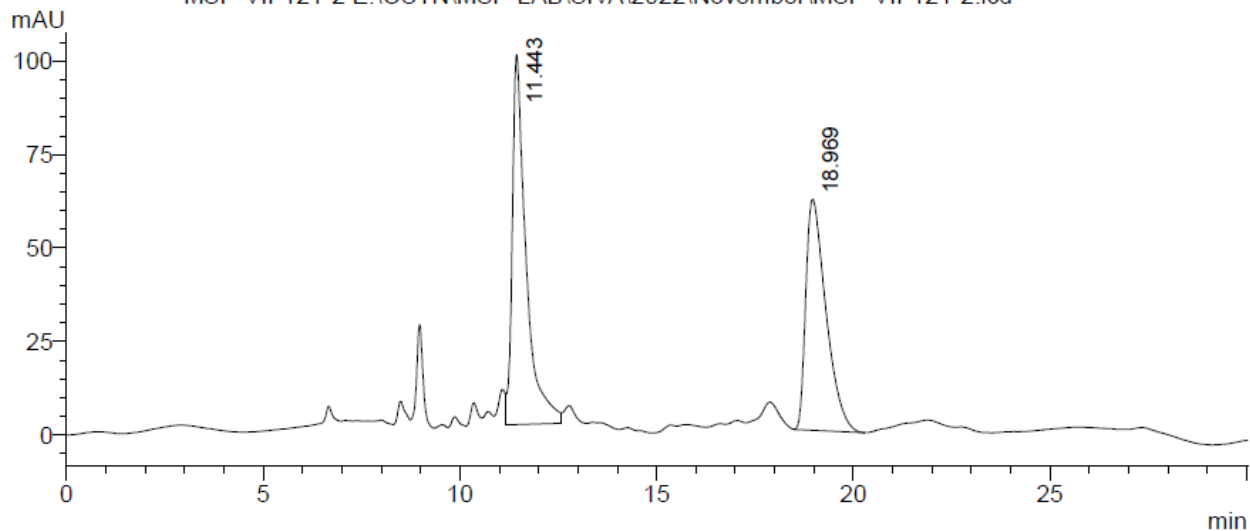

PDA Ch1 254nm

| Peak # | Ret. Time (min) | Area    | Height | Area%   |
|--------|-----------------|---------|--------|---------|
| 1      | 11.443          | 2404135 | 98897  | 52.176  |
| 2      | 18.969          | 2203639 | 61791  | 47.824  |
| Total  |                 | 4607774 | 160688 | 100.000 |

### HPLC Data of chiral 6'a: 99% ee

MSP-VII-118-2 E:\CUTN\MSP-LAB\SIVA\2022\November\MSP-VII-118-2.lcd

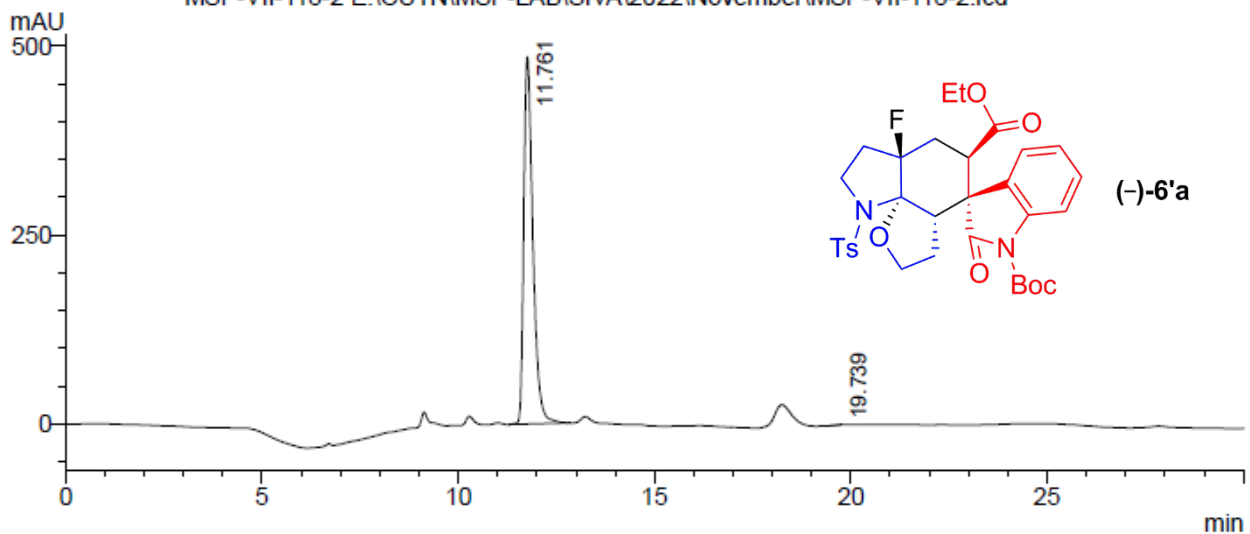

PDA Ch1 254nm

| Peak # | Ret. Time (min) | Area    | Height | Area%   |
|--------|-----------------|---------|--------|---------|
| 1      | 11.761          | 7863501 | 484636 | 99.998  |
| 2      | 19.739          | 138     | -31    | 0.002   |
| Total  |                 | 7863639 | 484605 | 100.000 |

HPLC Data of racemic **6'b**

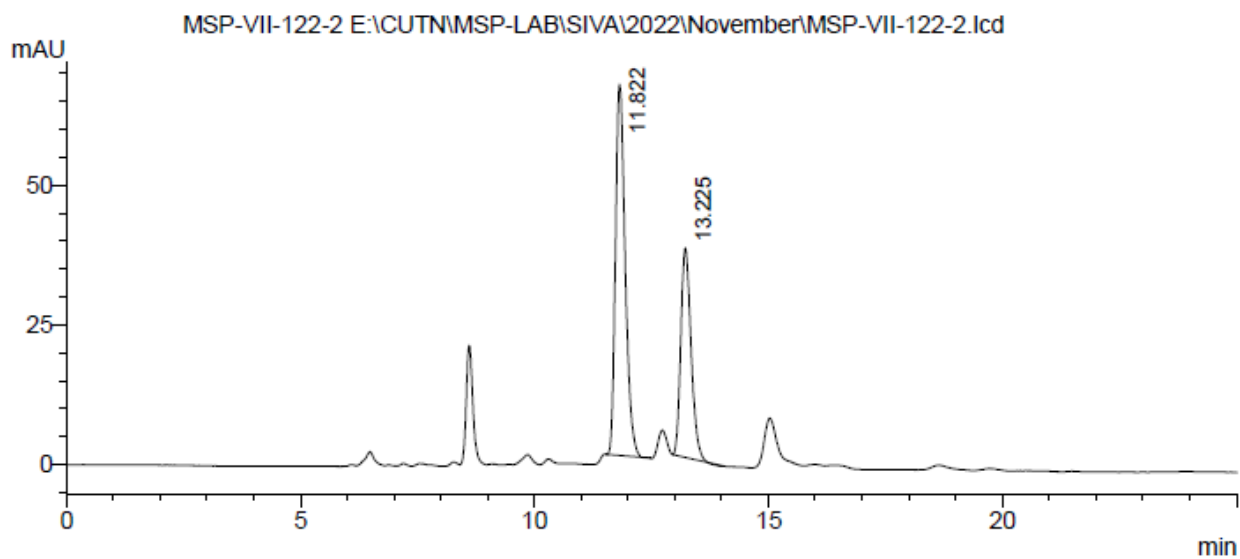

PDA Ch1 254nm

| Peak # | Ret. Time (min) | Area    | Height | Area%   |
|--------|-----------------|---------|--------|---------|
| 1      | 11.822          | 961146  | 66422  | 62.733  |
| 2      | 13.225          | 570987  | 37466  | 37.267  |
| Total  |                 | 1532134 | 103888 | 100.000 |

HPLC Data of chiral **6'b**: 98% *ee*

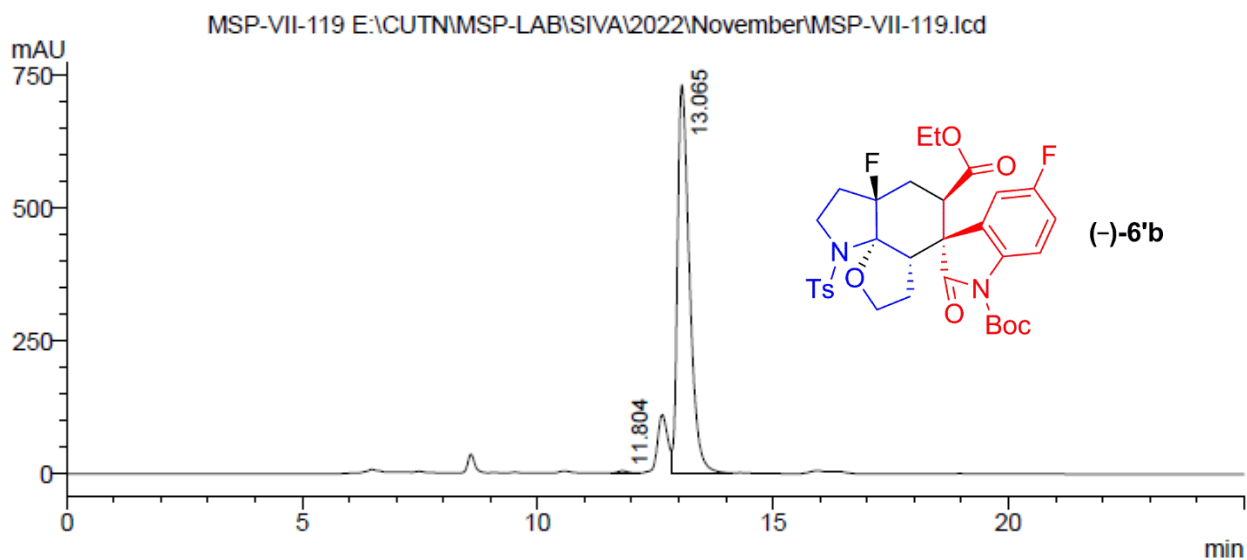

PDA Ch1 254nm

| Peak # | Ret. Time (min) | Area     | Height | Area%   |
|--------|-----------------|----------|--------|---------|
| 1      | 11.804          | 117114   | 5651   | 0.889   |
| 2      | 13.065          | 13057738 | 732531 | 99.111  |
| Total  |                 | 13174852 | 738183 | 100.000 |

HPLC Data of racemic **6'**c

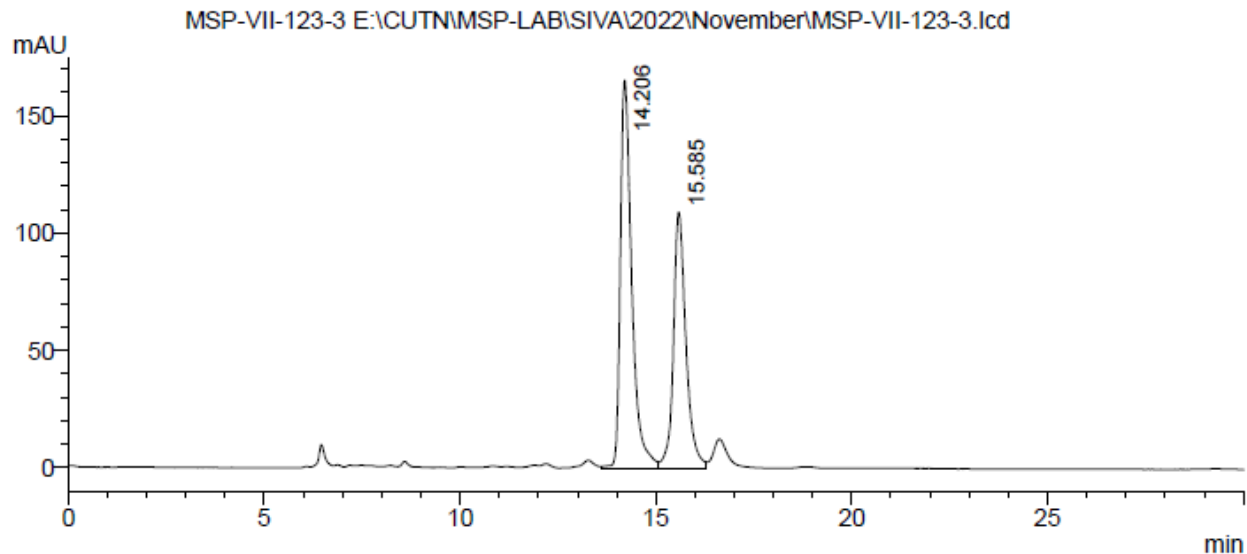

PDA Ch1 254nm

| Peak # | Ret. Time (min) | Area    | Height | Area%   |
|--------|-----------------|---------|--------|---------|
| 1      | 14.206          | 3357996 | 165302 | 58.059  |
| 2      | 15.585          | 2425801 | 109113 | 41.941  |
| Total  |                 | 5783798 | 274414 | 100.000 |

HPLC Data of chiral **6'**c: 93% ee

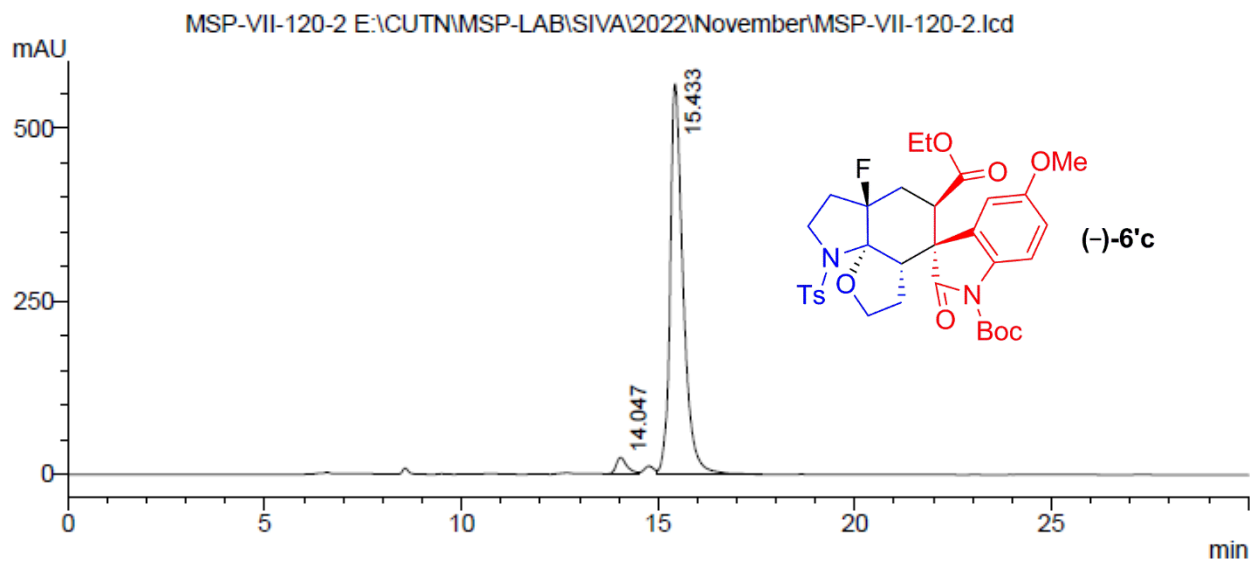

PDA Ch1 254nm

| Peak # | Ret. Time (min) | Area     | Height | Area%   |
|--------|-----------------|----------|--------|---------|
| 1      | 14.047          | 480451   | 24413  | 3.578   |
| 2      | 15.433          | 12947364 | 563205 | 96.422  |
| Total  |                 | 13427815 | 587618 | 100.000 |
